# Supplementary material for: Genetic Diversity Affects the Daily Transcriptional Oscillations of Marine Microbial Populations
Source: PLoS One. 2016 Jan 11;11(1):e0146706. doi: 10.1371/journal.pone.0146706 (PMC4709009; doi:10.1371/journal.pone.0146706)
Supplement: S1 Table — Transcription is shown for Prochlorococcus, Synechococcus and SAR11 genes and for the eukaryotic rbcL gene. (XLSX) [file pone.0146706.s005.xlsx]

## Sheet: Notes
Column	Description
Transcript ID	Transcript ID 6 digits									Sample ID	Date	Time			Sample ID	Date	Time
Full transcript ID	Full transcript ID as in the microarray design								CCS	SRX209108	2010-09-16	14:00:00		NPSG	SRS593027	2011-09-07	22:00:00
SRX…	Sample ID									SRX209284	2010-09-16	18:00:00			SRS593028	2011-09-08	01:00:00
Transcription Sum	Sum of transcription in all samples									SRX209285	2010-09-16	22:00:00			SRS593029	2011-09-08	03:00:00
Transcription cluster	Transcription cluster based on distance matrix calculated with the Pearson coef.									SRX209286	2010-09-17	02:00:00			SRS593030	2011-09-08	05:00:00
Significant cluster assignment?	Is the cluster assignment significant with P>0.95?									SRX209287	2010-09-17	06:00:00			SRS593032	2011-09-08	07:00:00
False discover rate for periodicity	False discover rate for periodicity based on Fourier score									SRX209288	2010-09-17	10:00:00			SRS593034	2011-09-08	09:00:00
Fourier	Fourier score									SRX209289	2010-09-17	14:00:00			SRS593036	2011-09-08	14:00:00
Closest organism	Closest organism based on Blastn vs NT (2012 and some in 2015)									SRX209290	2010-09-17	18:00:00			SRS593037	2011-09-08	17:00:00
NT identity %	Nucleotide identity (%) to the closest organism									SRX209295	2010-09-17	22:00:00			SRS593038	2011-09-08	19:00:00
Total score	Score for the best alignment									SRX209296	2010-09-18	02:00:00			SRS593041	2011-09-08	21:00:00
Gene	Gene									SRX209297	2010-09-18	06:00:00			SRS593043	2011-09-08	23:00:00
Gene annotation	Gene annotation									SRX209298	2010-09-18	10:00:00			SRS593045	2011-09-09	01:00:00
Pathway KEGG	Pathway KEGG									SRX209299	2010-09-18	14:00:00			SRS593048	2011-09-09	06:00:00
Source of the target seq	Where the target sequence was obtained from: environmental or genomic datasets														SRS593049	2011-09-09	09:00:00
Sequence	Nucleotide sequence of the target transcript														SRS593050	2011-09-09	11:00:00
Sequence length	Sequence length, nt														SRS593051	2011-09-09	13:00:00
															SRS593052	2011-09-09	15:00:00
															SRS593053	2011-09-09	17:00:00
															SRS593054	2011-09-09	22:00:00
															SRS593055	2011-09-10	01:00:00
															SRS593056	2011-09-10	03:00:00
															SRS593057	2011-09-10	05:00:00
															SRS593058	2011-09-10	07:00:00
															SRS593059	2011-09-10	09:00:00
															SRS593060	2011-09-10	14:00:00
															SRS593061	2011-09-10	17:00:00
															SRS593062	2011-09-10	19:00:00
															SRS593063	2011-09-10	21:00:00
															SRS593064	2011-09-10	23:00:00
															SRS593065	2011-09-11	01:00:00

## Sheet: SAR11.CCS
Transcript ID	Full transcript ID	SRX209108	SRX209284	SRX209285	SRX209286	SRX209287	SRX209288	SRX209289	SRX209290	SRX209295	SRX209296	SRX209297	SRX209298	SRX209299	Transcription Sum	Transcription cluster	Significant cluster assignment?	False discover rate for periodicity	Fourier	Closest organism	NT identity %	Total score	Gene	Gene annotation	Pathway KEGG	Source of the target seq	Sequence	Sequence length
359043	CAM_READ_0132359043	4.8	2.6	3.4	4	3.8	6.2	3.4	1.6	2.4	2.8	5.2	4	6.4	50.6	5	Yes	1.00317	4.74966	Candidatus Pelagibacter ubique HTCC1061	86	327	bop	bacteriorhodopsin	Signaling Molecules and Interaction	Environmental	GGGAAGAAGACGAAGGTACTAACTAAGTTAACGCTACTACGTTTTGGTTTTAGTAAGTCCGGTATGGCTGGATGGTTCTACATTCTTTATGAAGTATTTTCTGGTGAAGCAGGAAAAGCTGCAGCAAAAAGTGGTAACAAAGCTCTTGTTACTGCATTTGGTGCAATGAGAATGATTATTACAGTAGGTTGGGCTATTTACCCATTAGGTTACGTATTTGGTTACCTAACAGGTGGAGTTGACGCTAACACACTTAACGTTGTTTATAACGTTGCTGACTTCTTAAACAAAATTGCATTTGGTCTAGTAATTTGGGCTGCAGCTACGCAATCTAGTGGAAGAAAAGCTAAGTAATTAGTAACAC	364
878403	JCVI_READ_1092963878403	0	0	0	0	0	1	1	0	0	1	4	1	2	10	5	Yes	0.969875	4.41454	Candidatus Pelagibacter ubique HTCC7211	90	506	bop	bacteriorhodopsin	Signaling Molecules and Interaction	Environmental	GACGGGTCTGAGCATTCATACACTACATGTATATGAGAGAAGTATGGGTGTCTACTGGTGACTCGCCAACAGTTTACAGATATATCGACTGGTTGATTACTGTGCCACTACAAATGGTTGAATTCTATTTAATTCTATCTGCTGTAGGTAAAGCAAATTCAGGAATGTTCTGGAGATTGCTATTAGGTTCATTAGTAATGTTAATTGGTGGATACTTAGGTGAAGCTGGTTATATTAATGCAACACTTGGATTTATAGTTGGAATGGCAGGTTGGATATACATTCTATATGAAGTATTTTCAGGTGAGGCTGGTAAAGCTGCAGCTAAAAGTGGAAACAAGTCTCTTGTAACTGCTTTTGGTGCAATGAGAATGATTGTTACAGTAGGTTGGGCAATTT…	564
272649	JCVI_READ_1091143272649	0	0.4	0	0.8	0	2.6	0	0	0	0	0.2	0	1	5	5	Yes	0.86588	2.53778	Candidatus Pelagibacter ubique HTCC1062	79	363	bop	bacteriorhodopsin	Signaling Molecules and Interaction	Environmental	TTATGAAAAAACTTAAATTGTTTGCGCTTACAGCTGTTGCACTATTAGGTGTTACGGGTGTTGCAAACGCAGATGTTATGTTAGCTCAAGACGATTTTGTAGGAATTTCGTTTTGGGTGATTTCTATGGGAATGTTAGCAGCTACTGCTTTCTTTTTTATGGAAACAGGCAATGTAGCAGCAGGCTGGAGAACTTCAGTTATTGTTGCTGGTCTAGTAACTGGTATTGCATTTATACACTACATGTACATGAGAGAAGTATGGGTTAGTACTGGAGACTCACCAACAGTATACAGATATATTGACTGGTTAATTACTGTGCCACTACAAATGGTTGAATTCTATTTAATTCTATCTGCTGTAGGTAAAGCAAATTCTGGAATGTTCTGGAGATTGTTAC…	434
559607	JCVI_READ_1093015559607	0	0.75	1	0.75	1.75	0	0	0	0	0	0	0	0	4.25	3	Yes	0.756889	3.53139	Candidatus Pelagibacter ubique HTCC1062	80	538	bop	bacteriorhodopsin	Signaling Molecules and Interaction	Environmental	GGGGCCCTTTAAAACAAGCACGTCGCATCAGGCTGGAGAACATCAGTAATTGTTGCTGGTCTAGTAACTGGTATTGCTTTCATTCACTACATGTACATGAGAGAAGTATGGGTAAGCACAGGTGATTCACCTACTGTTTACAGATACATTGACTGGTTAATCACTGTACCATTACAGATGGTAGAATTTTACTTAATTCTAGCAGCTATTGGTAAAGCAAACTCAGGCATGTTCTGGAGATTATTAATTGGTTCAGTTGTTATGCTAGTTGGTGGATACTTAGGTGAAGCAGGATATATTAATGCTACACTTGGTTTCATCATTGGTATGGCAGGTTGGGTATACATTCTTTATGAAGTATTCTCAGGTGAAGCTGGAAAAGCTGCAGCAAAAAGTGGA…	627
468497	CAM_READ_0192468497	2.2	0.8	3.2	3	1.6	3.8	2.4	2.8	1.2	1.6	3	2.8	4.2	32.6	5	Yes	0.91875	1.5251	Candidatus Pelagibacter ubique HTCC1062	83	500	bop	bacteriorhodopsin	Signaling Molecules and Interaction	Environmental	ATCAACTGGTGACTCACCAACTGTTTACAGATATATTGACTGGTTAATCACTGTACCATTACAAATGGTAGAATTTTATTTAATTCTATCAGCTGTAGGAAAAGCAAATTCTGGAATGTTCTGGAGATTGTTAATTGGTTCAGTTGTAATGCTAGTTGGAGGATATTTAGGAGAAGCAGGTTACATCAATTCTATGCTTGGTTTTATTATCGGTATGGCTGGATGGATCTATATTCTTTATGAAATATTTTCAGGAGAAGCTGGAAAAGCAGCAGCAAAAAGTGGAAACAAAGCTCTTGTAACTGCATTTGGTGCTATGAGAATGATCGTTACAGTAGGTTGGGCAATTTACCCATTAGGTTACGTATTTGGTTACCTAACAGGTGGTGTGGATTCTAA…	495
675785	CAM_READ_0163675785	2.33	1	4	5.67	5.33	9.67	2.67	3.67	2.33	4.67	5	4.33	5.33	56	5	Yes	1.008	6.31664	Candidatus Pelagibacter ubique HTCC7214	83	422	bop	bacteriorhodopsin	Signaling Molecules and Interaction	Environmental	AATTCTAGCAGCTGTGGGAAAAGCAAATTCTGGAATATTCTGGAGATTGTTACTTGGTACAGTAGTAATGCTTGTCGGTGGATACTTAGGAGAAGCAGGTTACCTAGGCGAAGGTAGTGGTAAAATGCTTGGTTTCATAATTGGTATGGCCGGTTGGTTCTACATTCTTTATGAAGTATTCTCAGGTGAAGCAGGAAAAGCTGCAGCAAAAAGTGGAAACAAAGCTCTTGTTACTGCATTTGGTGCAATGAGAATGATCGTCACAGTAGGTTGGGCAATTTACCCACTAGGTTACGTATTTGGTGTCTTAACTGATTCTGCTAACCCAGAAGTACTTAATGTTATTTATAACCTTGCTGACTTCATAAACAAGATTGCATTTGGTCTAGTAATTTGGGC…	434
278215	NCBI_READ_1112614278215	3.33	4	4	8.33	5.67	14.67	4.67	4	4	6.33	7	8.33	11.33	85.66	5	Yes	1.06029	4.47407	Candidatus Pelagibacter ubique HTCC1062	85	827	bop	bacteriorhodopsin	Signaling Molecules and Interaction	Environmental	TTTATGAAAAACTAAAATTGTTTGCTCTTACAGCTGTAGCCCTAATAGGTGCTTCAGGTGTAGCAAACGCAGAAACTGCGCTGTTAGCTTCTAATGACTTTGTTGGAATCTCGTTTTGGGTGATTTCAATGGGTATGTTAGCAGCAACTGCTTTCTTTTTCTTAGAAGCAGGAAATGTAGCATCAGGTTGGAGAACATCAATAATTGTTGCTGGTCTAGTAACTGGTATCGCTTTTATACACTATATGTATATGAGAGATGTATGGGTTATGACTGGTGAGTCACCAACAGTATACAGATATATTGACTGGTTAATAACTGTACCATTACAAATGGTAGAATTTTACTTAATTCTATCTGCTGTAGGTAAAGCAAATTCTGGAATGTTCTGGAGATTGT…	780
648304	NCBI_READ_1112637648304	2	0.5	0.5	3	1.5	2.5	1.5	1	2	1.5	2.5	3.5	3	25	5	Yes	0.855333	3.64031	Candidatus Pelagibacter ubique HTCC1062	86	455	bop	bacteriorhodopsin	Signaling Molecules and Interaction	Environmental	TGGGCGGGCTGAGAGGCTAGCAGCTGTAGGAAAGCAAATTCTGGAATATTCTGGAGATTGTTAATTGGTACTGTTGTGATGCTAGTTGGTGGTTACTTAGGAGAAGCAGGATACATTAATGCTACACTTGGTTTTGTAATCGGTATGGCTGGATGGTTCTACATTCTTTATGAAGTATTTTCTGGTGAAGCAGGAAAAGCTGCAGCAAAAAGTGGTAACAAAGCTCTTGTTACTGCATTTGGTGCAATGAGAATGATTATTACAGTAGGTTGGGCTATTTACCCATTAGGTTACGTATTTGGTTACCTAACAGGTGGAGTTGACGCTAACACACTTAACGTTGTTTATAACGTTGCTGACTTCTTAAACAAAATTGCATTTGGTCTAGTAATTTGGGCT…	445
883216	JCVI_READ_1103242883216	13	11.4	16.8	15	12	45	12.8	22	5.8	20.6	25.2	17	34.6	251.2	5	Yes	0.858632	3.19508	Candidatus Pelagibacter ubique HTCC7211	93	479	bop	bacteriorhodopsin	Signaling Molecules and Interaction	Environmental	AAAAACGGCTGGGTTCTGCTGCATTGGTAAGCAATTCTGGAATGTTCTGGAGATTGTTACTTGGTTCAGTTGTAATGCTAGTAGGTGGATACTTAGGAGAAGCAGGATACATCAACGCTACACTTGGTTTCATTATCGGTATGGCAGGTTGGGTATACATTCTTTATGAAGTATTCTCAGGTGAAGCTGGTAAAGCTGCTGCAAAAAGTGGAAACAAAGCACTTGTTACTGCATTTGGCGCAATGAGAATGATTGTTACAGTAGGTTGGGCAATTTACCCATTAGGTTATGTATTTGGTTACTTAACAGGTGGTGTAGATGCTGAGTCACTTAACATCGTTTACAACTTAGCTGACTTTGTTAACAAAATTGCATTTGGTCTAGTAATTTGGGCTGCTG…	441
578615	JCVI_READ_1095901578615	0	0	0	0	1	0	0	2	2	1	0	0	0	6	2	Yes	0.776273	4.27867	Candidatus Pelagibacter ubique HTCC1062	89	791	bop	bacteriorhodopsin	Signaling Molecules and Interaction	Environmental	TTTTTTATGAAAAAACTAAAATTGTTTGCTCTTACAGCTGTTGCCCTAATGGGTGCATCAGGTGTAGCAAACGCAGAAACTGTGTTGTTAGCGTCTGATGACTTTGTTGGAATTTCATTCTGGCTTGTGTCAATGGCTTGTTTAGCAGCAACTGTGTTTTTCTTTTTAGAAAGAAGTTCAGTTCCAGCTGGCTGGAGAGTTTCAATCACTGTTGCAGGACTAGTTACTGGTATTGCATTCATACATTACATGTACATGAGAGAAGTATGGATCATGACTGGTGAGTCTCCAACAGTTTACAGATATATTGACTGGTTAATTACAGTTCCACTATTGATGCTAGAATTCTATTTTGTTCTTGCAGCAGTAGGTAAAGCAAACTCTGGAGTATTCTGGAGA…	612
442969	JCVI_READ_1091143442969	0.75	0	2.25	0.25	0.5	1	0.25	0.5	0	0	0.5	0.25	0.75	7	6	Yes	0.910879	1.43047	Candidatus Pelagibacter ubique HTCC1062	85	850	bop	bacteriorhodopsin	Signaling Molecules and Interaction	Environmental	TTTATGAAAAAACTAAAATTGTTTGCCTTACAGCTGTAGCCCTAATGGGTGCTTCAGGTGTAGCAAACGCAGAGACTGCGATGTTAGCGTCTGATGACTTTGTTGGAATCTCGTTTTGGGTGATTTCAATGGCGTTATTAGCGTCAACTGCTTTCTTTTTCCTAGAAGCAGGAAGTGTTGCTTCAGGTTGGAGAACGTCAATAATTGTTGCTGGTCTAGTAACTGGTATCGCTTTTATACATTACATGTATATGAGAGATGTGTGGGTTATGACTGGTGAGTCACCAACTGTTTACAGATATATTGATTGGTTAATCACTGTACCATTACAAATGATAGAATTTTATTTAATTCTAGCTGCTGTAGGAAAAGCAAATGCTGGAATATTCTGGAGATTGT…	780
584285	JCVI_READ_1091143584285	2.5	1.5	2.5	2.33	1.17	5.33	4.17	1.17	1.17	2.17	3	3.67	5.67	36.35	5	Yes	1.549	5.45539	Candidatus Pelagibacter ubique HTCC1062	85	854	bop	bacteriorhodopsin	Signaling Molecules and Interaction	Environmental	TTTTATGAAAAACTAAAATTGTTTGCTCTACAGCTGTAGCCCTAATGGGTGCTTCAGGTGTAGCAAACGCGGAAACAGCCATGTTGGCTTCTGACGACTTCGTTGGGATTTCATTCTGGCTAGTAACAATGGTGATGTTAGCGTCTACTGCTTTCTTTTTCTTAGAAGCAGGAAATGTTGCAGCAGGTTGGAGAACATCAATAATAGTAGCTGGTCTAGTTACTGGTATTGCATTTATCCATTACATGTACATGAGAGATGTATGGGTAACAACTGGTGAGTCACCAACTGTTTACAGATATATTGACTGGTTAATCACTGTACCATTACTGATGATAGAATTTTACCTAATTCTAGCAGCTGTAGGAAAAGCAAATTCTGGAATATTCTGGAGATTGT…	780
48033	NCBI_READ_1112309048033	0.8	1.6	0.6	0.4	0.4	2	0.6	0.8	0	1.4	0.8	0.2	1.4	11	4	Yes	0.848217	2.79648	Candidatus Pelagibacter ubique HTCC1062	91	913	bop	bacteriorhodopsin	Signaling Molecules and Interaction	Environmental	CAATGGCATGTCTAGCGGCAACTGTTTTTTTTTTTTTGAGAGAAGTTCAGTCCAGCACAATGGAGAACGTCAATAACTGTGCAGGACTAGTTACTGGTATTGCATTTATTCACTACATGTACATGAGAGATGTATGGATTACGACTGGTGAGTCACCAACAGTATACAGATATATTGACTGGTTAATTACAGTTCCATTATTGATGTTAGAATTCTATTTTGTTCTAGCAGCAGTAGGTAAAGCAAATTCTGGAGTATTCTGGAGATTGTTATTAGGAACACTAGTAATGTTAATCGGTGGATACTTAGGAGAAGCAGGATATATCAACTCTACACTTGGTTTCGTAATCGGTATGGCTGGTTGGTTCTACATTCTTTATGAAGTATTCTCAGGCGAAG…	654
396942	JCVI_READ_1091140396942	0.4	1	4.4	0.8	0	0.2	0.4	0	0	0.2	0.2	0	0.2	7.8	6	Yes	0.8465	4.29273	Candidatus Pelagibacter ubique HTCC1062	97	576	bop	bacteriorhodopsin	Signaling Molecules and Interaction	Environmental	TTATGAAAAAACTAAAATTGTTTGCTCTTACAGCTGTAGCCCTTATGGGTGTTACAGGTGTAGCAAACGCAGAAACTGCACTGTTAGCTTCTGATGACTTTGTCGGAATTTCGTTCTGGCTTGTGTCAATGGCGTTATTAGCGTCAACGGCATTCTTTTTTATTGAAAGAGCATCAGTTCCAGCTGGCTGGAGAGTTTCAATAACTGTTGCAGGACTAGTAACTGGTATTGCATTCATACACTACATGTACATGAGAGATGTGTGGATCATGACTGGTGAGTCACCAACAGTATACAGATATATTGACTGGTTAATTACAGTTCCATTATTGATGTTAGAATTCTATTTGTCTGCAGCTGCAAACCTTA	369
780168	JCVI_ORF_1105155780168	0	0	0	0	0	1	1.6	0	0	0	1	0	0	3.6	1	Yes	0.781941	3.57512	Candidatus Pelagibacter ubique HTCC1062	77	733	dmdA	dimethylsulfoniopropionate demethylase	Microbial metabolism in diverse environments	Environmental	ATTTGGGATGTTGCAGCAGAAAGACAAGTTGAAATTCAAGGTAAAGACTCAGCAAAACTTGTTCAACTAATGACATGCAGGGATTTATCAAAATCTAAAATTGGCAGATGTTATTATTGCCCAATCATTGATGACTCTGGTAATTTAGTAAATGATCCCGTAGTTTTAAAATTGGCAGAAGATAAATGGTGGATATCAATTGCAGACTCAGATGTTATCTTTTTTGCAAAAGGTTTAGCTACTGGATATAAATTTGATGTTAAAATTATTGAACCAATTGTAGATATTATTGCAGTCCAGGGTCCCAAATCTTTTGATTTGATGGAAAAAGTTTTTGGTAAGATAATTAAAGAATTGAAATTTTTTGGTTTTAGTTATTATGATTTTGAGGACACAAAA…	942
695960	WesternChannelOMM_READ_00695960	2	0	0	0	0	1	0.25	0.5	0	0	0.5	0	0.75	5	1	Yes	1.143	5.3549	Candidatus Pelagibacter ubique HTCC1062	77	358	dmdA	dimethylsulfoniopropionate demethylase	Microbial metabolism in diverse environments	Environmental	TTGAAAGTGGGTTGCTCTCTTATGGTAATGATTTTGATAATAATGATAATCCTTTAGAGTGNGGTTTTGATCAATATGTTTCATTAGACAGTGAAATCAATTTTTTAGGAAAAGAAGAATTAAAAAAGTTAGATCAGATGGATAAAAAAAAATTAATGGGAATTAAATTTGATGCTAAAGAAGTTAGTTTATCAGGATCATTAGATCTAAAAGATGAAGAGGATATTATTATCGGAGAATTGAGATCAGCATGCTATTCCCCACATTTTGAAAAAGTTATTGGCATAGCAATGATGAAAAAACCTTACTGGGAAGTGTCCCAAGGCGTTAAAGCTGAGATAAACGGTAATATTTGTACTGGAATCGTTTGCGATTTGCCTTTCATTTAGTATAAACTTC…	492
836118	WesternChannelOMM_READ_03836118	0	0	0	0	0	1	1.33	0	0	0	0	0.67	0	3	1	Yes	1.07475	5.12347	Candidatus Pelagibacter ubique HTCC1062	79	356	idiA	iron ABC transporter, substrate binding protein	Membrane Transport	Environmental	AAATGTTCAGACTCAGTAGAACCTTCCATTGCAGTAGTAGAGCTTTTTCCTGAACTAATAGTATTTGAAACTGCATCAAATAGATGTTCCAACTTCTCTTTGGTGCTTCACACTTGTGTAACCATCTTTTTCTCTAGCAAATTCTAATTCTTGAATTTTAGAATTATGTATTACTCACCAGAAAGAGTAAATGCAAATGAACTTAACGGTATGACTTACGAAGGTCTTGCTGATCCAAAATGGAAAGGTAGAGTTGTTATAAGAAAGTCTAACAATATCTATAACCAATCTCTTGTTGCATCATTAGTTAAAAATAATGGTAAAGCAGCAACTTGTTCTTGGGCAAAAGGTGTTGTGGCTAACATGGCTAGAGACTCTAA	380
232571	CAM_READ_0110232571	1.5	0.5	2.5	0.25	1.75	1.75	0.75	0.5	2.25	0	1	0.25	1	14	2	Yes	0.9272	2.91629	Candidatus Pelagibacter ubique HTCC1062	82	257	idiA	iron ABC transporter, substrate binding protein	Membrane Transport	Environmental	CAGTATCTTATTTAGGTAATATAGGTTCAAATAATACAGTCACTACAAATAATTTAGCTGTTAGTGAAACAATCGTTAATTTTAGTAAAACAGTTAATATTGGCATTCCTTTAAATCTCACATGAACATTAGTGGTGGTGGTGTATTAAAAAATGCTCCGAACAAAGCTAATGCAATTAAACTACTTGAGTTTTTATTAACTAAAGAAGCACAAACACATATAGTTAATAATACATTTGAATACCCAATGATTGATGGTGTTGAGCCTCATGCATTAGTTAAGCAAATGGGTCTTGGTTACAAACAAGATTTAGAAACAAAAGTTGCTAATTACGGAAAAAACCAGGCTGCAGCATTAGAAGTAATGTTAGCTGCTAAGTGGAAGTAAGTAATAAGTGA…	416
262174	WesternChannelOMM_READ_02262174	1.33	0.33	0	0	1	0	0	0	1.33	0	0	0	0	3.99	2	Yes	0.940867	1.69819	Candidatus Pelagibacter ubique HTCC1062	80	327	idiA	iron ABC transporter, substrate binding protein	Membrane Transport	Environmental	TAGCAGTTGCTGCTGGAGAGGCTGACTTAGCTGTAGCTAATACTTATTACTTAGCTTTAATGCTGTCTGGAAAAAAAGGAGCTGAACAACAAGCAGCAGCTAAAAAAGTATTACCATTTTTTCCAAATCAAAGGTGATAGAGGAACACACATGAATATTAGTGGTGGCGGAGTATTAAAAAATGCACCAAATCCGGAAAATGCAAAAAAACTTCTTGAGTTTTTATTAACTAAAGAAGCGCAAGAACACATTAGTTAATAATACATTTGAATATCCAATGATTGATGGTGTTGAACCNCATGATTTAGTAAAACAAATGGGTCTTGGATTTAAACAAGATTTAAATACTAAAAGTTGTTAATTATGGAAAAATAATTGTCCAATTAAAGCAATTTGAAG…	444
754137	CAM_READ_0124754137	1.5	0	0	0	0.5	0	0	0	1	0	0	0	0	3	2	Yes	0.888471	1.40402	Candidatus Pelagibacter ubique HTCC1062	80	367	idiA	iron ABC transporter, substrate binding protein	Membrane Transport	Environmental	GTACATGGCGAAAGGACGTTGTGGCTAACATGGNTAGAGATTCTAAAGGAAACGATAAGAGCTCAAATTTTAGCAGTAGCAGCAGGTGAAGCTGATTTAGCAGTAGCTAATACTTACTACTTAGCTTTGATGTTGTCTGGAAAAAAAGGTACCAGAACAACAAGCAGCAGCTAAAAAGTTTTACCATTCTTCCCTAATCAAGGAGATAGAGGAACTCACATGAACATTAGCGGAGGCGGTGTATTAGTAAATGCTCCAAACCCAGATAATGCAAAAAAACTACTTGAGTTTTTATTAACTAAAGAAGCACAAGAACATATAGTTAATAATACATTTGAATACCCAATGATTGCAGGTGTTGAGCCTCATGCATTAGTTAAACAAATGGGTCTTGGTTAC…	466
768568	WesternChannelOMM_READ_06768568	0.17	0	0	0.5	0.83	0	0.67	0	0.83	0.17	0	0	0.5	3.67	2	Yes	0.936259	2.08928	Candidatus Pelagibacter ubique HIMB5	72	114	idiA	iron ABC transporter, substrate binding protein	Membrane Transport	Environmental	TAGAAAACCACAAGGGAACGACAGATCTCAAATAATGGCCGTTGCAAATGGTGAAGCAGATATCGCTATAGCTAATAGCTATTACATTGGAATAATGCTTTCTGGATTAGCGGGACAAGAACAACAAAAAGCAGCAAATAAAGTCAAAATGGTTTTTCCTAATCAGCAAGACAGAGGCGCTCACATTAATATTAGCGGAGCTGGAATTTTAAAAAATTCCCCAAACACCTCTAACGCTAATTTATTTTTAGAATTTCTTTTATCGAAACGAGTGCAAGAGAATATGGTCAACAAATCTTATGAATACCCCATAGCTCAAGGAGTACTTCCAAGTAAAGAAATAGCTAGTTTCGGTACAAATTTTAAAGAAGATCAAACATCAGTAAAAAGCTTTGGAGA…	478
612855	CAM_READ_0165612855	0	1.8	0	0	1.6	0	0.2	0.4	0.4	0.6	0	0	0	5	3	Yes	0.936241	1.84703	Candidatus Pelagibacter ubique HTCC1062	80	381	idiA	iron ABC transporter, substrate binding protein	Membrane Transport	Environmental	TCTCCGACTCAGAGGTAATGATAGAGCTCAGATATTAGCAGTAGCAGCAGGTGAAGCAGATTTGGCTGTAGCAAATACTTATTATTATGCATTAATGTTATCTGGTAAAAAAGGTGCTGAACAGCAAGCAGCAGCAAAAAAAGTTTTACCTTTCTTCCCAAATCAAGGTGATAGAGGTACTCATATGAACATTAGTGGTGGTGGAATTTTAAAAACAGCACCTAATGCAGATAATGCAAAAAAAATTACTTGAGTTTTTATAACTAAAGAAGCACAGAGCCATATAGTTAATAATACATTTGAATACCCAATGATTGATGGTGTTGAGCCTCATGATTTAGTCAAAACAAATGGGGTCTTGGATACAATCAAGATTTAAAAAACTAAAGTTGTTAATTA…	479
287951	CAM_READ_0153287951	0.67	0	0.33	0.67	1.33	0	0.33	0	0.33	0	0.67	0	0.33	4.66	3	Yes	0.825538	3.94141	Candidatus Pelagibacter ubique HTCC1062	79	382	idiA	iron ABC transporter, substrate binding protein	Membrane Transport	Environmental	ATATCGCGAGGTTGCATCATTAGTTAAAAATAATGGAAAGTCAGCAACTTGTACTTGGGCAAAAGGTGTTGTGGCAAATATGGCTAGAGACTCTAAAGGAAACGACAGAGCTCAAATTTTAGCTGTAGCCGCAGGTGAAGCTGATTTAGCAGTAGCTAATACTTACTACTTAGCTTTGATGTTATCTGGAAAAAAAGGTCCAGAACAACAAGCAGCAGCTAAAAAAGTTCTACCATTTTTTCCAACCAAGGAGATAGAGGAACTCACATGAACATTAGTGGTGGTGGTGTATTAAAAAATGCCCCAAATCCAGATAATGCAATTAAATTACTTGAGTTTTTAATTAACTAAAGAAGCACAAACACACATAGTTAATAATACATTTGAATACCCAATGAT…	531
448804	JCVI_READ_1103180448804	0	0	0.5	0.5	2	1.5	1.5	0.5	4	0	2.5	0	0.5	13.5	2	Yes	0.860636	2.86986	Candidatus Pelagibacter ubique HTCC1062	78	313	idiA	iron ABC transporter, substrate binding protein	Membrane Transport	Environmental	AGAAAAGGTAGAAATCTGCGTAACTTGGTAATTGGGGAGTAATTTCGCGACTAGCGTCGAATTGAATTCCGCGTCGGATTAAGAATTATATGTAATTGCTTGAAAATACGCGAGGGGCGACTTCCGCTAATTTCATAACCGGTCTGAAAGATCGGCAAGAACCTAAAGTTGGCTCAGGTGTTACCTCTGCCCAATAAAGCAACTGTTCAAAAATTCAAAATAATAATGGGTGGGTAGCAAAAAGACAAGATAATTTATACTCACTTGAAAGAGTGGGGGCGCTGAATATCTGTTTACTTACGAAGGTTTAGCTGATCCAAAATGGAAAGGTAGATTAGTAAAAGAAATCAAGCATATTTATAACAAATCTCTTGTGGCTTCATTGATTGCAAATAATGG…	720
827473	JCVI_READ_1091120827473	0.6	1	1.2	0	1.6	0.4	0	0	0.4	0	0	0	0	5.2	3	Yes	0.916	2.04476	Candidatus Pelagibacter ubique HTCC1062	80	783	idiA	iron ABC transporter, substrate binding protein	Membrane Transport	Environmental	TAATGAAAAAAATAACATTAATAGTATTAATTTTAGCATTCTTTACTACTTTTGGTAATGCAGCTGAAGTTAACGTATTCAGTGCAAGACATTATGATTCAGATATTCAACTTTATGAAAAATTTACTGCTAAAACAGGAATTAAAGTAAACGTCATTTCTGGAAAAGATAAGGCTCTTCAAAAAAGAATTGTTGAAGAAGGAGCCGATTCTAAAGCGGATATTTATATTACAGCAGATGCCGGAAGATTAGGTGCATTTGATGCAAAAGGAATGTTTCAAAACTCTATGACACCTGTAATTAAATCAGCCGTACCTAAAAACTTTAGATCTACAAATTGGACTGGAATAGCTAAGAGAGCTAGAATTATGTATTACTCTCCAGAAAGAGTTAATGCCA…	957
540729	JCVI_READ_1095901540729	0	1	2	0	1.5	0	0	0	0.5	0	0	0	0	5	3	Yes	0.824929	3.81648	Candidatus Pelagibacter ubique HTCC1062	79	794	idiA	iron ABC transporter, substrate binding protein	Membrane Transport	Environmental	GCAGCTGAGATCGATATTCAGCTTTATCAAAATTTACAGAAAAAACCGGTATTAAAGTAAATGTTGTATCTGGAAAAGATAAAGCTCTTCAAAAAAGAATAACAGAAGAAGGATTAGACTCTAAAGCTGATATTTATATTACAGCAGATGCAGGAAGATTAGGTGCATTTGATGCAAAAGGAATGTTTCAAAACTCTATGACACCTGCAATTAAAGCAGCAGTTCCTAAAAACTTTAGATCTACAAATTGGACGGGGATAGCTAAGAGAGCTAGAATTATGTATTACTCACCAGATCGAGTTAATGCAAACGAGCTTAACGGCATGACATACGAAGGTCTCACAGACTCTAAATGGAAGGGTAGAGTTGTTATAAGAAAATCTAACAATATCTATAATC…	960
97570	JCVI_READ_1092256097570	1.33	0	0.67	0	0.67	0	0	0	1	0	0	0	0	3.67	2	Yes	0.863923	2.43597	Candidatus Pelagibacter ubique HTCC1062	79	850	idiA	iron ABC transporter, substrate binding protein	Membrane Transport	Environmental	ATAATGAAAAAACTCACAATTATTGCATTTTTCATGGCTTTATTTGCAAACATGACATTTGCTGCTGAAGTTAATGTATTCAGTGCAAGACATTACGACTCAGATATTCAACTTTACGAAAAATTTACAGCTAAAACTGGAATTAAAGTAAATGTTGTATCTGGTAAAGATAAAGCCCTTCAAAAAAGAATAACTGAAGAAGGTGCCGACTCAAAAGCTGATCTTTATATTACTGCTGACGCAGGAAGATTAGGTGCATTCGCTGCAAAAGGAATGTTCCAAAATTCTATGACTGCTGCAATCAAAGCTGCCGTACCAGCAAACTTTAGAACTGCTAAATGGACTGGAATAGCTAAGAGAGCAAGAATTATGTATTACTCACCAGAAAGAGTAAATGCA…	1023

## Sheet: Syn.CCS
Transcript ID	Full transcript ID	SRX209108	SRX209284	SRX209285	SRX209286	SRX209287	SRX209288	SRX209289	SRX209290	SRX209295	SRX209296	SRX209297	SRX209298	SRX209299	Transcription Sum	Transcription cluster	Significant cluster assignment?	False discover rate for periodicity	Fourier	Closest organism	NT identity %	Total score	Gene	Gene annotation	Pathway KEGG	Source of the target seq	Sequence	Sequence length
898229	CAM_READ_0161898229	0.33	0	1.33	0	1	0	0	0	0.33	0	0	1.33	0	4.32	0	0	NA	NA	Synechococcus sp. CC9902	89	562	aapJ	polar amino acid ABC transporter periplasmic amino acid-binding protein	Membrane Transport	Environmental	AGCTCGACAGATGGCTGATCTGAGTGGTAAAGCCATTTGCGTTGGATCGGGAACCACCACTGAGCAGAATTTGAACGATGCGTTCGCCGCGCAGGGTCTTCCCTACACACCGATCAAATACCAAGACCTAAGCCAAGTGGTGGGTGGCTATTTGCAAGGTCGTTGCGCCGCTATGACCTCCGATCGTTCGCAGCTGGCATCGGCCCGTTCTGGATTTAAAGACCCGCAAGAGCATGTGATTTTGGCGGACCGGTTGAGCAAAGAACCTCTGGCTCCAGCCGTTGTTGGGGGTGATCAACGGATGGCGGATGCCACCACTTGGGTGGTGTATGCCTTGATCGAAGCGGAGGAACGTGGCATCACCCAAGCCAACCTTGACGATGTTCTTGAGCAGGCTGT…	439
93281	CAM_READ_0165093281	0.4	0.4	1.2	0	0	0.6	0.2	0	0	0.2	0.2	2	1.8	7	0	0	NA	NA	Synechococcus sp. CC9902	85	532	amt	ammonium transporter	Membrane Transport	Environmental	CCTGGTGATCTTTATGAATGCTGGCTTCGCCATGGTCGAAGCAGGCATGTGCCGTACAGAAAATGCCGTCAATATTCTTGCCAAAACCTGTTTGTGTTTGCCCTCGCGGTGACTGCTTACTGGTTCATCGGTTACTCGTTGATGTACGGATCCAACGAGATCATTCCGGGAATTCTCTCTATTAATAGTTTGTTTTTCGATCCTGCCGTTAGCGCTGAAACCATCAGCGAAGCTGGCCTTGTGCCAACGGTTGATTTCCTCTTTCAGGCGGCGTTTGCTGGCACAGCAGCCACGATCGTTTCCGGCCTTGTGGCCGAACGAATCAAGTTTGGCGAATTTGTGATCTTCGCCCTAGTTCTTACAGCCTTCATTTATCCAGTTGCCGGCAGCTGGGAATGG…	511
604181	CAM_READ_0164604181	0	0	0	0	0	0	0.5	0	0	0	0	0	3	3.5	0	0	NA	NA	Synechococcus sp. CC9311	89	636	amt	ammonium transporter	Membrane Transport	Environmental	TGGTTCCCAGCTGGCAATGGATCAGTGGGTTCCTTACGTTGCTGTAACCACAACATTGGCTGCGGCGGGTGGCGCGATCGGGGCCACCGTGATCTCAACAGTCACATCCGGCAAACCTGATTTGACCATGATCATCAACGGCATCCTTGCCGGCTTGGTGAGCGTGACGGCAGGTTGTGGAAACCTCACTTTTGTTGGCTCCTGGGTTGCTGGTCTTGTTGGCGGAATCATCGTCGTCTTTGCAGTATCAGCTCTTGATTCAGCAGGCATCGACGATCCTGTCGGAGCCTTCTCTGTCCATGGCGTCTGTGGCGTCTGGGGAACCTTGGTGGTTGGTCTTTGGGGTTTTGACATCCAGGGCGATGGCTCACCACTGGGCTTACTTGTGGGAGGAGGCTT…	490
2851	S9902_02851	1.67	0.33	1	0	0	0.17	0.33	0.83	0	0.67	0	0.17	0.33	5.5	9	Yes	0.461471	4.85558	Synechococcus sp. CC9902	100	2914	amt	ammonium transporter	Membrane Transport	Genomic	ATGACAACTGCCTATCAATCGCCACCGTTGCGAAGGCGTAAAACGCTTCAAGAAGCAAGTCTTTTAAACGGCCCCATGTTGCTGCTCAACAGCATCAGGGGATTCAGCTCCAACCGCGCCGCCATCTGGCTCGCTTGCGCACCGCTGGCATTGCTTGGTCTTGGCATCTTTACGTTGTCGGCCAAGGCTGAAGAGCTTCCCGAGCTATCAGCCGCTTTCCTTGCCAACAACCTTTGGCTGCTGGTCGCCACGATCCTGGTGATCTTCATGAATGCCGGCTTCGCCATGGTCGAAGCCGGCATGTGCCGTCAGAAAAACGCCGTCAATATTCTTGCCAAAAACCTCTTCGTGTTTGCCCTCGCGGTGACCGCCTATTGGTTTGTTGGCTACTCCTTCATG…	1470
73805	CAM_READ_0165073805	1.33	0	0.5	1.83	0.17	0	1	0.83	1	1	0.17	1	2.17	11	0	0	NA	NA	Synechococcus sp. CC9902	84	379	arsC	arsenate reductase	Unclassified	Environmental	TCTTGGCTGAACCGCTTTTGGTTTACAGCTACAACCGCTGCAGTACTTGCCGAAAGGCCTTGGCCTGGCTCACGGATCAAGGACTGGCCCACGACGTGCACGACATCGTGGATCATCCCCCGTCTCGAGACGAGCTCGTTGCTGCCTATGCCTTTCTGGGGGATCGAAAGCTGTTGTTCAACACCAGTGGGCAGAGCTATCGCGCTCTCGGATCGTCCGTTGTGAAAGCCATGACCGATGCCGAAGCCCTCGATGCCCTGTCGAAGGACGGGAAGCTGATTAAGCGTCCGTTTTTGAAACGACCTGACGGCAGCTTTTTGGTTGGTTTCAAGCCCGAGGTTTGGGCGTCC	350
18151	S9902_18151	0.5	0	0.33	0.33	0	0.17	0.17	0.67	0	0	1.5	4	1.33	9	12	Yes	0.548148	3.99627	Synechococcus sp. CC9902	100	720	arsC	arsenate reductase	Unclassified	Genomic	TTGGCTGAACCGCTTCAGGTTTACAGCTATAACCGCTGCAGTACTTGCCGAAAGGCCTTGGCTTGGCTCACGGATCAAGGAATTGCCCACGATGTGCACGACATCGTGGAAAATCCTCCATCTCGAAACGATCTCGACGCTGCATTCGCCTTTTTGGGCGATCGCAAGCTGTTGTTCAACACCAGTGGTCAGAGCTACCGCGCCCTTGGTTCAGCTGTGGTGAAAGCCATGTCGGACTCGGAAGCCCTCGCGGCACTTGCAAAGGACGGGAAGTTGATCAAGCGACCGTTTGTGAAACGGTCGGATGGTTCTTTTCTGGTTGGTTTCAAGCCGGAGGTTTGGGCGTCCGGTCTGCAGGACTGA	363
188412	JCVI_READ_1091145188412	0	0	0	0	0	0	2	0	0	1	0	0	0	3	7	Yes	0.828539	1.98688	Synechococcus sp. WH8020	92	506	arsC	arsenate reductase	Unclassified	Environmental	CCGTGCCCACCATCCGTTTTGAGCAGGAAGGCCAACAGGTCGGTTGCATCGAAGGAGCGAATTTACGCAAAGCAGCCCTTTCCTCCGGGATCAATCCCTACAAAGGTCTGAACAACCTCAATAACTGTGGCGGGGTTGGCCAGTGCGGAACCTGCGTGATCGAGGTTCTCGAAGGGGCCCAGAACCTCTCCCCCCGTAGCGATGTTGAAGAGGTGTACCTCTCTGACCGACCTGCGAACTATCGCTTGAGCTGCCGCACCAGTGTGAATGGCGATGTGACGATTAAGACTCGCCCTGACGAAGGTGTGGGCAAGGGTTCGAACAGCCTGCTTGGTGCTGTGAAGAACTTG	350
579771	CAM_READ_0164579771	1	0.5	0	0.75	0.25	0	0	0.25	0	1.5	0	0.75	0	5	11	0	0.614032	3.55403	Synechococcus sp. CC9902	95	787	chpX	putative CO2 hydration protein ChpX	Unclassified	Environmental	AAGAGGAATTAATCCAGCGCCTGTTGTCCGACACCCCTTTGTTGGCGGATACGCAAGACCATCTCGTTCAGGTGGTGAATGTGTTGAGACCTATGGAATCGTCTTGACGCTTACAGCAGAACTTGGTGGATCAAGGCGAGAAGCAGTTTGCTTTAATCCCTTCCCCATCTTTCGTTTTTTTCCACGAGGGGTTAACGCCAAAGCGGCTCTGGGATCACCTTCTCGGTGATCGGATTAATTTCGAGTACGCCGAATATTGCCAAAAAGCTATGTTCTGGCATGGCACTGGTGGCCTTGATGCCTATCTCGATAGTGAGCCTTTTCAGGATGTTTGCCAGCGGATTATCCAGCGAAAGGCCCAGAGCGATCCTTTGCTGGCCCTCACCAACAAGCTGTATC…	513
218199	CAM_READ_0165218199	0	0	0	2	0	0	0	0	0	0	0	1	0	3	4	Yes	0.637344	3.4327	Synechococcus sp. CC9902	91	585	chpX	putative CO2 hydration protein ChpX	Unclassified	Environmental	TTCGTTCTCTCACCACGTATCTATTGCTTGGGCTTGTTCTGGCGGGTGATGAGTTGATCTCTTCGTTGATTTGGCTCGTCGCTATGCGATCAGGAAGTNACCTGCGTCAACGATGTGGTGCATCACATCCGTGATGGGCTTGTCGCCGCTGCCGCGAATCCAATCACCTATGAGGTGGACGTGGCTGGNGAAAAAATCTGGGTGTTACCGCCGGAAGCTGGGCTCACCTTTTTGGTGGATGTCGCTGTCCCCTACGTCGAAGCTGTGTTTTTCCGGGGAATGCCGTTTCTCGGCACCGTGTCGTATAACGCGCAGGCGCGCCAGATTTCACCAGATATCAGTGATTTCAAGTACGGCGCTCTCTATGCCGATCCGATTCCGAGCATGGGAGCTGGAATT…	428
19101	S9902_19101	1	3.33	1.33	1.5	0	0	0	0.33	1.17	0	0	0	1.33	9.99	4	Yes	0.360385	5.37727	Synechococcus sp. CC9902	100	3271	coxA	cytochrome c oxidase subunit I	Energy Metabolism	Genomic	ATGACTGTCACACTTCCTCCCAACAGCACGGCCCCAGCCCCAAAACTTCAGCCCACGGGCTGGTTGCGGTACTTCAGTTTCAGCGTTGATCACAAAGTGATTGGCCTGCAATATCTCGTCTGCGGGTTTGTTTTTTACCTGATCGGTGGAGCTCTCGCTGGAGCCATCCGCACAGAACTGGCCAGCCCCGTCGCCGACTTCATGGCTCGGGACGTCTACAACCAAGTGCTCACCTTGCATGGCACGGTGATGATTTTTCTTTGGATCGTTCCTGTGGTGAACGGCGCCTTTGGAAACTATTTGATCCCGTTTTATGTGGGTGCTCGGGACATGGCTTTCCCACGGCTGAATGCCGTTGCTTTTTGGCTGATTCCACCTGCTGGCCTGATGTTGGTGGCC…	1671
21881	S9311_21881	2.33	2.33	2.33	0	0	0	0.67	0	1.67	0.33	0	0	0	9.66	2	Yes	0.262381	5.8344	Synechococcus sp. CC9311	100	3301	coxA	cytochrome c oxidase subunit I	Energy Metabolism	Genomic	ATGACACTCACCCTTCCGCAGCAAAGCAAGCCCCCCTCGTTGCAACCCACTGGTTGGCTTCGCTATCTCAGTTTTAGCGTCGATCACAAAGTGATCGGGCTTCAATATCTTGTGTGTGGGTTCGCTTTTTACCTTATTGGTGGTGCCCTTGCTGGCGCTATTCGTACAGAGCTGACCAGCCCTGTGGCTGATTTTATGCCCCGGGATGTTTATAACCAGGTGCTTACATTGCACGGCACTGTGATGATCTTTCTCTGGATCGTTCCGGTGGTCAATGGTGCCTTTGGCAACTATCTGATTCCGTTTTATGTGGGAGCCAGGGATATGGCCTTCCCAAGGCTGAATGCTGTTGCATTTTGGTTGATTCCTCCAGCTGGATTACTTCTGATCACTAGTTAT…	1665
796069	CAM_READ_0166796069	2	1.33	0.67	0	0	0	0.67	0	0	0	0	0	0	4.67	7	Yes	0.342143	5.35945	Synechococcus sp. CC9311	91	650	coxA	cytochrome c oxidase subunit I	Energy Metabolism	Environmental	AAGCATGACTCTCACCTCCTCAGCAGACGCAAACCCCCTCGTTGCAACCCACTGGCTGGCTTCGCTATCTCAGTTTTAGCGTCGATCACAAAGTGATTGGGCTTCAATATCTTGTGTGTGGATTTGCTTTTTACTTTATTGGTGGTGCCCTTGCTGGCGCGATTCGTACAGAGCTGACCAGTCCCGTTTCAGACTTTATGCCCCGGGAGGTTTACAACCAGGTGCTTACATTGCACGGCACTGTGATGATCTTTCTTTGGATCGTCCCAGTTGTCAATGGCGCCTTTGGCAACTATTTGATTCCGTTTTATGTGGGAGCCAGGGATATGGCCTTCCCGAGATTGAATGCTGTTGCATTTTGGTTGATTCCTCCAGCTGGTTTACTCCTGATCACCAGTT…	475
757036	WesternChannelOMM_READ_00757036	1.5	0.5	0.5	0	0	0	0	1.5	0	0	0	0	0	4	9	Yes	0.514762	4.4619	Synechococcus sp. CC9311	90	727	coxA	cytochrome c oxidase subunit I	Energy Metabolism	Environmental	CTGGTACTTTGATTCTTCTGAGCTTCGATATCGTTGCGCACACGGGATTCTTTAATCCAGGAATGGGTGGAAACGTTGTTGTTTATCAGCACCTCTTCTGGTTTTACTCTCATCCAGCCGTCTACATCATGGTGTTGCCGGCATTTGGATTGGTGAGTGAAATTCTTCCGATTCATTGTCGGAAACCACTTTTTGGATACACCACGATGGTGTATTCGATCATGGCGATCGTTGTTCTTGGGCTTGTTGTTTGGGCCCATCACATGTTTACCAGTGGTACGCCTCCATGGATGCGTCTGTTTTTCACAATCGCAACGGCCTTTATTGCTGTTCCGACTGGCATTAAATTCTTTAACTGGATAGCTACTTTATGGGGAGGAAAAATCAGCCTTAATAGTG…	518
716319	CAM_READ_0166716319	1	1	0	0	0	0	0	0	0	0	0	0	1.5	3.5	2	Yes	0.344828	5.32186	Synechococcus sp. CC9311	92	681	coxA	cytochrome c oxidase subunit I	Energy Metabolism	Environmental	ATCAGACACCGTTTTGCTGCTTGGGGGAAGTTCAATTTTTGGTGGAATAAACTTTATCGCCACGATTCTGAAATTGCGTCGGCCTGGATTGAAGCTGATGCAATTGCCTATGTATTGCTGGGCAATGCTTGGAACGAGCATTCTTGTTGTTCTGTCAACACCAGTTCTTGCTGGCACTTTGATTCTTCTGAGCTTCGATATTGTTGCTCACACTGGATTCTTTAATCCCGGAATGGGCGGAAATGTTGTTGTCTATCAGCACCTTTTTTGGTTTACTCCCATCCAGCCGTCTATATCATGGTGTTGCCGGCCTTTGGTTTGGTGAGTGAAATTCTGCCGATTCATTGCCGAAAACACTTTTTGGATACACCACGATGGTGTATTCGATCATGGCGATCG…	498
19091	S9902_19091	0.67	2.17	0.17	0	0	0	0.33	0.83	0	0	0	0	0	4.17	9	Yes	0.2405	5.92294	Synechococcus sp. CC9902	100	1641	coxB	cytochrome c oxidase subunit II	Energy Metabolism	Genomic	GTGCAGATCCCGTCCGCGATTCTCACGCTTGTGCTGGGGATGGCCTTAGTCCTTGGGGGACTGTGGATCGGACAAACGATCAATCTTCTGCCGATCGACGCCAGCATCAACGCTCCGATTTACGACGAACTTTTCAAGGTTCTGTTCACAATTGGAACCATTCTGTTCGTTGGCATCACAGGTCTTCTGATTTTTAGCTTGATTCGTTTTCGACGACGAAGCGATCAAATCGGTGATGGAGTTGCCATTGAGGGCAACCTTCCTCTTGAAATTTTTTGGACGGCAGTCCCTGCCATCGTTGTGCTCTTCGTAGGTCTCTACAGCTACGACATCTATGACCGCATGGGAGGAATGGTTCCTTTGGCCCATGACCACATGGGAGGCATGCACGAGGAAAGA…	828
4981	S9311_04981	26.83	9.83	5.67	7.17	2.67	3.67	3.83	4.83	6.5	7.67	5	7.83	9.83	101.33	4	Yes	0.821277	1.8305	Synechococcus sp. CC9311	100	1100	cpaB1	phycocyanin, beta subunit	Energy Metabolism	Genomic	ATGCTCGACGCATTCTCACGTTCGGTCGTCAGTGCCGACGCCAAAACTGCTCCCGTTGGTGGTAGTGACCTCGCAGGTCTCCGCTCCTACGTTCGTGACGGCAATAAGCGTCTCGATGCCGTCAACGCCATCACCTCAAACGCCTCCTGCATCGTTTCTGATGCTGTTACGGGCATGATTTGTGAAAACACAGGTCTGATCCAGGCAGGTGGCAATTGCTATCCCAACCGTCGTATGGCAGCTTGCCTGCGCGACGGAGAGATCGTTCTCCGCTACATCAGCTATGCCCTTTTGGCAGGCGATGCATCCGTTCTTGATGATCGTTGCCTGAATGGTCTGAAGGAAACCTACATTGCACTGGGCGTTCCTACCCAGTCTGCAGGTCGTGCCGTGGCCATC…	555
20691	S9902_20691	21.5	5.67	6.17	4.33	9.5	8.5	1.33	4.33	4.33	8.67	8	11.83	6	100.16	10	Yes	0.17875	6.33634	Synechococcus sp. CC9902	100	1100	cpaB1	phycocyanin, beta subunit	Energy Metabolism	Genomic	ATGCTCGACGCATTTTCCCGTTCGGTCGTCAGCGCTGACGCCAAAACTGCACCTGTCGGTGGTAGCGACCTCGCTGGTCTGCGCTCCTATGTCAGTCAAGGCAACAAGCGTCTTGACGCTGTTAACGCCATTACATCCAACGCCTCCTGCATCGTTTCTGATGCAGTAACAGGCATGATTTGCGAGAACACTGGCCTGATCCAGGCTGGTGGTAATTGCTATCCCAACCGCCGCATGGCAGCTTGCCTGCGCGACGGAGAAATCGTTCTGCGTTACATCAGCTACGCCCTGCTGGCTGGCGATGCTTCCGTGCTCGATGACCGTTGCTTGAATGGTCTCAAGGAGACCTATATCGCTCTGGGCGTTCCTACCCAGTCCGCAGGTCGTGCCGTCGCCATC…	555
8906	BL107_08906	0.75	0.25	0	0.25	0.5	0.75	0.5	0	0.5	0.5	0.75	0.5	1.25	6.5	10	Yes	0.168182	6.56447	Synechococcus sp. BL107	100	1026	cpaB1	phycocyanin, beta subunit	Energy Metabolism	Genomic	ATGCTCGACGCATTTTCCCGTTCGGTCGTCAGCGCTGACGCCAAAACTGCACCTGTTGGTGGTACCGACCTCGCTGGTCTGCGTTCCTACGTCAGTCAAGGCAACAAGCGTCTAGACGCTGTTAACGCCATCACCTCCAACGCCTCCTGCATCGTTTCTGATGCCGTAACAGGCATGATTTGCGAAAACACTGGTTTGATTCAGGCTGGTGGCAACTGCTATCCCAACCGCCGCATGGCTGCTTGCCTGCGTGATGGTGAGATCGTTCTTCGCTACATCAGCTACGCCCTGCTGGCTGGTGACGCATCCGTGCTCGACGATCGCTGCTTGAACGGTCTTAAAGAGACCTACATCGCTCTGGGCGTTCCGACTCAGTCTGCAGCTCGCGCCGTGGCCATC…	555
8956	BL107_08956	36.5	9.5	2.5	7	13.5	38	6	8.5	6.5	16.5	39	25	22.5	231	10	Yes	0.234444	6.04051	Synechococcus sp. BL107	100	1291	cpaB2	phycocyanin, beta subunit	Energy Metabolism	Genomic	TTGAGCAAAAGCGAGATCATTCCGCTTTTATTCATATTTGATTCAGATTCAACGAATGCAAACTTTCTTGTCTACACATCTGCATTGAGCTGGGAGGCAAGGAACCAGGGTTACTGTCAACCCGATGCGGATTCGCATTCCCCCAACAACACTCCCACAACCATGCTCGACGCATTCTCCAGGAAGGCCGTATCGGCCGATTCCAGCGGTGCTTTCATCGGCGGAGGCGAGCTGGCCTCTCTGAAGTCTTTCATCGCTGATGGCAATAAGCGCCTTGACGCAGTGAACGCTATTTCTGGCAACGCCGCTTGCATCGTCTCTGACGCTGTTGCAGGCATCTGCTGCGAGAACACCGGCCTTACCGCTCCTAACGGTGGTGTGTACACCAACCGCAAAATG…	699
5081	S9311_05081	27.83	15	11.67	8.5	2.5	13.83	7.5	7.5	3	13.67	17.17	7.83	12	148	10	Yes	0.635714	3.4672	Synechococcus sp. CC9311	100	1166	cpaB2	phycocyanin, beta subunit	Energy Metabolism	Genomic	ATGTCCTTTTGGCGGATACGCATCCCCCCAAAAAACTCTTCCCAACTCCTCATGCTCGACGCATTCTCCAGGAAGGCCGTCTCGGCCGATTCAAGCGGCGCCTTCATTGGCGGAGGCGAGCTTGCCTCTCTCAAGTCATTCATTGCTGACGGCAACAAGCGCCTTGACGCTGTTAACGCCCTCTCATCAAATGCTGCTTGCATCGTCTCTGACGCCGTTGCTGGCATTTGCTGTGAAAACACCGGCTTAACTGCACCTAACGGTGGTGTGTACACCAACCGTAAAATGGCGGCTTGCCTCCGTGATGGCGAGATCGTTCTCCGTTATGTGAGCTACGCGCTTCTGGCAGGCGACGCTTCCGTCCTGCAGGATCGCTGCCTTAACGGACTCCGCGAAACC…	588
20741	S9902_20741	2.67	1.33	0.67	0.33	2.67	2.33	0	0.67	1.33	2	1.33	0.67	0.33	16.33	10	Yes	0.461429	4.82136	Synechococcus sp. CC9902	100	1029	cpc	phycocyanin, beta subunit	Energy Metabolism	Genomic	ATGTTCGACGCCTTCACCAAGGTTGTCGCCCAGGCAGACGCCCGGGGACAGTTCATCAGCACCAGCGAGATTGATGCTCTCGCCGCCGTCGTCTCCGACAGCAACAAGCGTTTGGACGCTGTGAGCCGGATCTCCAGCAACGCTTCGACCATCGTTGCGAATGCTGCCCGTCAGCTGTTTGCTCAACAGCCTGCGCTGATCGCTCCAGGTGGCAACGCTTACACCTCCCGTCGGATGGCTGCTTGCCTGCGCGACATGGAAATCATCCTCCGCTACGTCACTTACTCAGTGTTCACTGGCGATGCTTCCGTCATGGAAGACCGCTGCCTGAATGGCCTGCGCGAGACCTACCTGGCACTCGGAACTCCTGGCGCATCCGTCGCATCAGGCGTAAATCTG…	519
4921	S9311_04921	2.67	1.33	2.67	0	0	0	0.67	0.67	0.67	0.33	0.33	1.33	0.67	11.34	7	Yes	0.34	5.30507	Synechococcus sp. CC9311	100	1029	cpc	phycocyanin, beta subunit	Energy Metabolism	Genomic	ATGTTCGACGCCTTCACCAAGGTTGTCGCCCAGGCCGACGCCAGGGGACAGTTCATCAGTGCCAGTGAGATTGATGCTCTGGCTGCCATGGTTTCCGGCAGCAATAAGCGCTTGGATGCCGTGAGCCGGATTTCCAACAACGCCTCCACAATCGTTGCCAATGCTGCACGCGAGCTTTTCGCACAACAACCTGCTCTGATCTCTCCCGGAGGAAACGCATACACCTCCCGTCGTATGGCAGCTTGCCTGCGCGACATGGAGATCATCTTGCGTTATGTCACCTATTCAGCATTCACGGGTGACGCATCTGTCCTTGAAGATCGTTGTTTGAATGGTCTTCGTGAGACCTATCTCGCATTGGGAACACCTGGCACCTCTGTTGCAACTGGTGTGAACCTG…	519
868727	CAM_READ_0163868727	2	0	0	0	0	0	0	0	0	1	0	0	0	3	0	0	NA	NA	Synechococcus sp. CC9902	89	499	dnaA	chromosomal replication initiator protein	Replication and Repair	Environmental	GCTTGCAACAACGACTGATTTCTCGCTTTCAGATGGGACTGATTGCTGATATCCAATCCCCCGACCCTTGAGACGCGGATGGCGATTCTTCAAAAGAAAGCGGAGCAAGAGCGGATGGCTTTGCCTCGGGATCTGATCCAGTTCATCGCTGGTCGTTTCACCTCCAATATTCGAGAGCTGGAGGGAGCTCTGACCCGTGCGGTGGCGTTTGCTTCGATTACAGGCCTTCCGATGACGGTGGAGTCGGTCGCGCCGATGCTTGATCCCACCCGGACAAGGCGTGGAGGTGTCTCCTCAGCAGGTGATTGAGAAAGTTTACCGTAGGTGTTCGATGTCACCGCAGAGGAGATGTGCAGCAGTACCCGCCGTCGTGCCGTCAGCCAGGCTCGTC	391
981529	CAM_READ_0164981529	2.25	0	0.25	0.25	0	1	1	0	0	0	0	0.25	0	5	0	0	NA	NA	Synechococcus sp. CC9902	88	590	dnaE	DNA polymerase III subunit alpha	Replication and Repair	Environmental	CGGCCTGGACCGTTGGATGCTGGCTTGATTCCAAAATTACATTAATCGAAAACATGGCCGCGAAGCGATTGATTTCGCCCATGAGATCCTTGAGCCGATCTTGAGTGAAACCTATGGAATTATGGTTTATCAGGACAAATCATGCGGATCGCGCAGGATTTAGCGGGTTATTCACTCGGTCAAGCCGACCTTCTGCGTCGGGCGATGGGTAAGAAAAAGGTGTCGGAAATGCAAAAGCATCGCGACATTTTTGTTGAGGGTGCTAAGAAGCGCGGCGTCGATGTGAAAGTTTCCGATGAATTATTCGACCAAATGGTGCTCTTTGCCGAGTACTGCTTCAACAAGAGTCATTCCACCGCCTATGGCGCAGTGACGTATCAAACCGCATATCTCAAGGCG…	472
373721	CAM_READ_0165373721	1	1	0	0	0	0	0	0	1	0	0	0	1	4	0	0	NA	NA	Synechococcus sp. CC9902	86	453	dnaE	DNA polymerase III subunit alpha	Replication and Repair	Environmental	CGAAGGGCTCATCATTGCCACGGCATGTCTTGGAGGAGAGATCCCTCAAGCGATTTTGCGAGGTCGTCCGGAGGTTGCCCGTGATGTTGCCCGCTGGTACCAAGACGTTTTTGGAGATGACTTCTACCTAGAAATTCAAGACCATGGGTCTCCTGAAGACCGAATCGTCAATGCGGAAATCGTCAAGATTGCCCAGGAATTAGACATCCAACTTGTGGCGACGAATGATGCCCATACCTCACCAAGCAGGATGTAGAAGCGCACGATGCGCTCCTCTGTGTGTTGACCGGGAAGTTAATTAGCGATGAGAAACGTCTTCGCTATACCGGCACGGAATACATCAAAACAGAAGAAGAGATGAGTCGATTGTTTACGGACCTATCTCGA	387
673237	CAM_READ_0164673237	0.5	0.17	0	0.83	0	0	1	0	1	0	0	4.33	0.5	8.33	12	Yes	0.770641	2.60963	Synechococcus sp. CC9902	90	549	dnaE	DNA polymerase III subunit alpha	Replication and Repair	Environmental	CCAATGGCATTTGTTCCCCTCCATAACCACAGCGATTACAGCCTGCTCGACGGGGCGTCGCAGTTGCCGTCCATGGTGGAGCGGGCGAAGGAGCTGGGCATGCCCGCCATTGCACTCACCGATCACGGTGTGATGTATGGCGCGATCGAGCTGCTCAAGCTTTGCAAGGGAACCGATCTCAAGCCAATCATTGGTAATGAGATGTATGTCATCAATGGCTCGATTGATGACCCTCAGCCGAAAAAGGAGAAGCGCTACCACCTCGTCGTGTTGGCAAAAAATGCCACCGGGTATCGCAATCTTGTGAAGCTCACCAGCATCAGCCATTTGCGCGGCATGCGTGGTCGTGGCATTTTTTCCGGGCGTGTGTCGATAAACAGCTACTAAAGCTCTACAGCG…	415
470751	CAM_READ_0164470751	0.4	0.8	0.6	0	0	0	0.8	1.6	0.8	0	0	0.2	0	5.2	9	Yes	0.339091	5.20951	Synechococcus sp. CC9902	91	726	dnaE	DNA polymerase III subunit alpha	Replication and Repair	Environmental	CCCCACCTACTTCTTGGTGGTATGGGATTACATCCGCTTCGCTAGAGAACAGAGCATTCCAGTCGGACCAGGGCGGGGTTCTGCGGCGGGGTCCTTGGTGGCTTACGCCCTAGGGATCACCAACATTGATCCGGTGAGCAATGGCTTGCTGTTTGAGCGATTCCTCAATCCAGAACGGAAGTCAATGCCTGATATTGACACCGATTTTTGTATTGAGCGTCGTAGTGAAGTCATCGACTACGTCACTGAACGCTATGGGGACGACAAAGTTGCCCAGATCATCACGTTTAACCGGATGACATCCAAGGCCGTCCTCAAGGATGTGGCCCGTGTGCTCGATATTCCCTACGGAGATGCCGACCGTCTCGCCAAGTTGATCCCTGTCGTTCGGGGTAAGCC…	528
538911	CAM_READ_0164538911	0.83	1.5	3	1.5	0.67	1.5	0.33	0	0.67	1.67	0	1.33	0.83	13.83	0	0	NA	NA	Synechococcus sp. CC9902	86	601	dxs	1-deoxy-D-xylulose-5-phosphate synthase	Metabolism of Terpenoids and Polyketides	Environmental	TGACGGACCGACCGCTCGTGCGGATTCCGCGTGGTTCTGGAGAAGGGGCTCTTTTGATGGAAGAAGGATGGGAAGCCCTTTCCATTGGCCGAGGGGAATTACTGCGGGACGGTAATGATTTGGTGATCGTTGCCTATGGCTCCATGGTGGCCCCAGCCATGGAAACGGCAGCGCTTTTAGAGGCCGCTGGATTATCCGCCTCCGTGATCAATGCGCGTTTCGTAAGACCTCTTGATCAGGCCCTTATTCATCCTTTGGCCCGTCGGGTTTCCCGCGTCGTCACCATGGAAGAAGGCACATTGTCTGGTGGGTTTGGTGCAGCCGTTTTGGAGTCCCTCAATGATCACGACATCAATGTGCCTGTTTTAAGGATCGGTATTCCTGATCAACTGGTGGACC…	523
638285	CAM_READ_0163638285	1.5	0.17	0.67	0.33	0	0.17	0	0.5	1.33	0.67	2.17	0.5	0.17	8.18	0	0	NA	NA	Synechococcus sp. CC9902	87	637	dxs	1-deoxy-D-xylulose-5-phosphate synthase	Metabolism of Terpenoids and Polyketides	Environmental	CAACATGGTGTTGCTGGATATTTGAAGCGATCCGAAAGCCGATTCGATCACTTCGGTGCCGGTCATGCCAGTACGTCGATTTCAGCAGCCCTAGGAATGGCTTTGGGCCGCGATAATCGCGGAGAGGATTTCAAATGTGTTGCGGTTATTGGAGATGGAGCCCTAACGGGGGCATGGCCCTTGAAGCGATTAACCACGCTGGGCACCTTCCAAATACCCCTTTCTTGGTGGTGTTGAACGACAACGACATGTCGATTTCACCGCCGGTTGGTGCCCTTTCGAGCGTGCTTAACCGGGCACGACTGAGCCCTCCGATGCAGTTCCTTTCTGGAAGCGTCGAAGAAAGTGTTCGTCATCTGCCATTTATGGGGGGTGAGCTTCCTGCCGAGCTGGACCGTT…	531
548205	CAM_READ_0164548205	0.33	0	0.33	0.33	0.33	1	0	0	0.33	0	1.33	0.33	3.67	7.98	0	0	NA	NA	Synechococcus sp. CC9902	88	544	dxs	1-deoxy-D-xylulose-5-phosphate synthase	Metabolism of Terpenoids and Polyketides	Environmental	GCATCCGAACGAGTTGCACGGCCTCAGTCTTGCTGAGCTCGAAGACGTTGCCCGTCAGATCAGGGAACGCCATCTCGGCGTTGTTTCGACCAGTGGTGGACACCTTGGGCCAGGGCTCGGTGTCGTTGAACTCACCCTTGCTCTGTATCAAACGCTCGATCTGGATCGGGACAAAGTGTGTTGGGACGTTGGTCACCAGGCCTACCCCACAAGCTGATCACTGGTCGCTTCAATTCGTTTGATTCGCTGCGTCAGCAACATGGTGTTGCTGGGTATTTGAAGCGATCCGAAAGTCGATTCGATCACTTCGGTGCCGGTCATGCCAGTACGTCGATTTCAGCAGCCCTTGGAATGGCTTTGGGCCGCGATAATCGCGGAGAGGATTTCAAATGTGTTGCG…	443
296027	CAM_READ_0163296027	0.6	0.8	0.2	1.2	0.2	0	0.2	1	1.8	0.2	0.2	1.2	0	7.6	0	0	NA	NA	Synechococcus sp. CC9902	88	630	dxs	1-deoxy-D-xylulose-5-phosphate synthase	Metabolism of Terpenoids and Polyketides	Environmental	GACATGTCGATTTCGCCGCCGGTTGGTGCNCTTTCGAGCGTGCTTAACCGGGCACGACTGAGCCCTCCGATGAAGTTTCTTTCTGGAAGCGTCGAAGAAAGTGTTCGTCATCTGCCATTCATGGGGGTGAGCTTCCTGCCGAGCTGAACCGTTTAAAAGGCAGCATGCGTCGCTTGGCGGTCCCCAAAGTGGGTGCCGTTTTTGAGGAGCTCGGTTTTACCTATATGGGGCCGATCGATGGTCACGACATCGCCGAGATGACCCGCACGTTCCAAGCGGCCCACCGTGATGGTGGACCTGTGCTAGTTCATGTTGTCACCAAGAAAGGCAAGGGTTATCCCTATGCCGAGGCTGATCAAGTCGGTTATCACGCCCAGTCGGCATTCGACTTGAGCACCG…	495
650549	CAM_READ_0164650549	0	1	0.5	0.75	0.75	0	0	0	0	0.5	0	0	0	3.5	0	0	NA	NA	Synechococcus sp. CC9311	88	610	dxs	1-deoxy-D-xylulose-5-phosphate synthase	Metabolism of Terpenoids and Polyketides	Environmental	GCAAATTCGCGAACGCCGATCTGGAGGTGGTGTCGAACAGCGGCGGTCATCTTGGACCTGGATTAGGCGTGTTGATTAACCCTGGCCCTCTACCAAACCCTTGATCTGGATCAAGACAAGGTGTTTGGGATGTGGGACATCAGGCCTATCCGCACAAATTAATAACCGGACGCTACGGAAGCTTTGACTCCCTGCGTCAACAGGGAGGAGTGGCCGGTTATCTCAAGAGACCGAAAGTCGTTTTGATCATTTCGGTNCGGGGCATGCCAGCACATCCATCTCGGCAGCCCTCGGAATGGCCATAGCCCGTGATCGGCAAGGTCTTGATTACAAATGCGTTGCTGTTATTGGTGATGGAGCCTTAACCGGTGGCATGGCATTGGAAGCCATCAACCACGC…	491
416863	CAM_READ_0164416863	0.2	0.2	0.2	0	0.6	0.2	0	0	0.8	0.2	0.6	0.2	0.2	3.4	0	0	NA	NA	Synechococcus sp. CC9902	88	659	dxs	1-deoxy-D-xylulose-5-phosphate synthase	Metabolism of Terpenoids and Polyketides	Environmental	CGTGCTTAACCGGGCACGACTGAGCCCTCCGATGCAGTTCCTTTCTGGAAGCGTCGAAGAAAGTGTTCGTCATCTGCCATTTATGGGGGTGAGCTTCCTGCCGAGCTGGACCGTTTAAAAGGCAGCATGCGTCGCTTGGCGGTCCCCAAAGTGGGTGCCGTTTTTGAGGAGCTCGGCTTTACCTATATGGGGCCGATCGATGGTCACGACATTGCCGAGATGACCCGCACGTTCCAAGCGGCCCACCGTGATGGTGGACCTGTTTTGGTTCATGTTGTCACCAAGAAAGGCAAGGGTTATCCCTATGCCGAGGCTGATCAAGTCGGTTATCACGCCCAGTCGGCATTCGACTTGAGCACCGGTAAAGCCATCCCATCATCAAAACCAAAGCCACCGAGT…	526
11651	S9902_11651	0.4	0	1.2	0.2	0.2	0.2	0	0	0.4	0.8	0.2	0.2	0.2	4	1	Yes	0.175714	6.40783	Synechococcus sp. CC9902	100	3830	dxs	1-deoxy-D-xylulose-5-phosphate synthase	Metabolism of Terpenoids and Polyketides	Genomic	ATGCATCTCGGAGATCTCAAGCATCCGAACGAATTGCACGGCCTCAGTCTTGCTGAGCTCGAAGATGTCGCTCGTCAGATTAGGGAACGCCATCTCGACGTGGTTTCAACGAGTGGTGGACACCTTGGACCGGGGCTTGGTGTCGTTGAACTCACCATTGCTCTGTATCAAACCCTCGATCTCGATCGGGACAAAGTGTGTTGGGACGTGGGGCACCAGGCCTATCCCCACAAGTTGCTCACTGGTCGCTTCAATTCCTTTGACTCCCTCCGGCAGCAACGCGGTGTAGCTGGTTATTTGAAGCGTTCTGAGAGCCGTTTTGATCACTTCGGTGCAGGCCATGCCAGCACGTCGATTTCTGCAGCACTGGGGATGGCGTTGGGCCGTGATAACCGCGGT…	1932
780793	CAM_READ_0163780793	0	0	4	0	0	0	0	0	0	0	0	0	0	4	1	Yes	0.581695	3.75192	Synechococcus sp. CC9902	91	715	elaC	ribonuclease Z	Translation	Environmental	GAACTCCGGCTCTCGCAGCTCAGACGGGTCTTCGTGACCCATATGCACGGCGATCACGTGTTCGGCCTCCCAGGCCTGCTGGCCAGCCTTGGCCTAGCTGGCAATAGCAACGAAGGCGTCGACCTCTACGGCCCTGATCCCCTCGAGAGCTATCTCAGCGGTGTGCTGCGGACGAGCTCCACCCGGATCGGCTACCCACTCAAAGTGCACCGCGTCCATGACTGCGCCGAGAACGGAACACTGGTTTATGAAGACGATGATCTGATGGTGCGTTGCACACCACTCACCCATCGCGTTCCGGCCTATGCCTATCGGGTGGACCAAAAACCTTTGGCGGGTTACGATTCGATATCGCCAAGGCGAAGGAGCTAAAGATCCCTCCTGGCCCCATCTACGCCC…	510
832681	CAM_READ_0164832681	2	2.25	2	0	0.5	0.5	0.25	0.75	1	1	0	1.5	0.25	12	0	0	NA	NA	Synechococcus sp. CC9902	89	659	ftsZ	cell division protein FtsZ	Cell cycle	Environmental	CCAAAAACCGCTTACAACTCGGCCAAACCCTCACCCGAGGCTTGGGTGCTGGCGGCAACCCCACCATTGGACAAAGGCCGCGGAAGAATCCCGCACGGATCTGCATGATTCGCTCCAAGGCGCTGATCTGGTATTTATCGCGGCCGGCATGGGCGGCGGAACTGGAACGGGTGCTGCCCCCGTCGTCGCAGAAGTCGCCCGCGAAATTGGTGCCCTGACCGTTGGCATCGTCACCAAGCCGTTCAGCTTCGAAGGGCGTCGACGCATGCGCCAAGCCGATGAAGGTATTGCTCGACTTGCGGAGCATGTCGACACCCTGATCGTGATTCCGAACGATCGCCTACGAGATGCCATCGCCGGTTCACCTCTTCAAGAAGCATTCCGAAGCGCTGACGACGT…	512
82613	CAM_READ_0165082613	2	1.4	1.4	0.2	1	0.6	0.2	0.4	0.6	0.4	0	1.2	0.2	9.6	0	0	NA	NA	Synechococcus sp. CC9902	90	526	ftsZ	cell division protein FtsZ	Cell cycle	Environmental	CGACGCATGCGCCAAGCCGATGAAGGTATTGCTCGACTTGCGGAGCATGTCGANACCCTGATCGTGATTCCGAACGATCGCCTACGAGATGCCATCGCCGGTTCACCTCTTCAAGAAGCATTCCGAAGCGCTGACGACGTTTTGCGGATGGGTGTCAAAGGCATTAGCGACATCATTACCTGCCCTGGCCTCGTCAACGTTGACTTTGCGGATGTCCGCTCGGTGATGACCGAAGCAGGCACAGCACTGCTTGGCATTGGCATCGGGTCCGGTCGGTCCCGTGCCATCGAGGCAGCACAAGCGGCAATCGCCAGTCCACTTTTAGAAACCGAACGCATCGACGGAGCCAAAGGCTGCGTGATCAACATCAGCGGCGGTAAGGACATGACCC	391
66927	CAM_READ_0163066927	0.5	2	0.83	0	0	0	0	2.83	0.83	0.5	0	0	0	7.49	0	0	NA	NA	Synechococcus sp. CC9902	86	486	ftsZ	cell division protein FtsZ	Cell cycle	Environmental	GCGATCTAGAAGGTGTTGCTTATCGCGTGCTGAATACCGATGCACAAGCACTCATCCAGTCGCAATCCAAAAACCGCTTACAACTCGGCCAAACCCTCACCAGAGGCTTGGGTGCTGGCGGCAACCCCACCATTGGACAAAAGGCCGCGGAAGAATCCCGCACGGATCTGCATGATTCGCTCCAAGGCGCTGATCTGGTATTTATCGCGGCCGGCATGGGCGGCGGAACTGGAACGGGTGCTGCCCCCGTCGTCGCAGAAGTCGCCCGCGAAATTGGTGCCCTCACCGTTGGCATCGTCACGAAGCCGTTCAGCTTCGAAGGGCGTCGACGCATGCGCCAAGCCGATGAAGGTATTGCTCGACTTGCGGAGCATGTCGACACCCTGATCGTGATTCCGA…	412
532377	CAM_READ_0164532377	0	1	0	0	0	0	1	0	1.17	0	0	0	0	3.17	2	0	0.589649	3.78537	Synechococcus sp. CC9902	90	650	ftsZ	cell division protein FtsZ	Cell cycle	Environmental	CGAAGCGCTGATGACGTTTTGTCGGATGGGTGTCAAAGGCATTAGCGACATCATTACCTGCCCTGGCCTCGTCAACGTTGACTTTGCTGATGTCCGCTCGGTGATGACCGAAGCAGGAACAGCACTGCTCGGTATTGGCATCGGGTCCGGTCGGTCCCGTGCCATCGAGGCAGCACAAGCAGCAATAGCCAGTCCACTTTTGGAAACCGAATGCATCGACGGAGCCAAAGGCTGCGTGATCAACATCAGCGGCGGCAAGGACATGACCCTTGAGGACATGACCACAGCCTCTGAAGTGATTTACGACGTGGTGGATCCAGAAGCCAACATCATTGTTGGTGCCGTAGTTGATGAAGCTCTTGAAGGAGAGATTCACGTCACCGTGATCGCTACAGGATT…	477
697379	CAM_READ_0164697379	0.5	0.5	0.25	0.5	0	0	0.25	0.25	0	0	1.5	0	0.75	4.5	5	Yes	0.79378	2.3853	Synechococcus sp. CC9902	89	567	ftsZ	cell division protein FtsZ	Cell cycle	Environmental	CCGTCAACGTTGACTTTGCGGATGTCCGCTCGGTGATGACCGAAGCAGGCACAGCACTGCTTGGCATTGGCATCGGGTCTGGTCGGTCCCGTGCCATCGAGGCCGCACAAGCAGCAATCGCCAGTCCACTTTTAGAAACCGAACGTATCGACGGAGCCAAAGGCTGCGTGATCAACATCAGCGGCGGCAAGGACATGACCCTTGAGGACATGACCACAGCCTCTGAAGTGATTTACGACGTGGTCGACCCAGAAGCCAACATCATTGTTGGTGCCGTCGTTGATGAAGCTCTTGAAGGAGAGATTCACGTCACCGTGATCGCGACAGGATTCGAAAACAACAAGTCGTATAGCTCTGAACAGTCGAATCGCATATCAACCAATCCATTGTCTCCACAAG…	441
636583	CAM_READ_0164636583	0.83	1.83	3	0.17	1.67	1.5	0	0.33	1	2.67	0	0.67	0.67	14.34	0	0	NA	NA	Synechococcus sp. CC9902	90	612	glnA	glutamine synthetase, type I	Amino Acid Metabolism	Environmental	TACATGGCCAAAACCCTCAGGAGGTCCTTCGTCAAATCAAGGACGAAGGCATAGAGCTAATCGACCTGAAATTCACTGACCTCCACGGCAAGTGGCAACACCTGACGGTGTGCACCGAGTTGTTAGAGGAAGAGTCTTTCACCGAGGGATTGGCCTTCGATGGATCCTCCATTCGCGGATGGAAGGCGATTAATGCCTCCGATATGGCAATGGTGCCGGATCCAAGTTCCGCATGGATAGACCCGTTTTATCGGCATAAAACCTTGAGCATGATTTGCTCAATCCAGGACCCTCGCACCGGTCAGGATTACGACCGCTGTCCGCGGGCACTGGCGCAACGCGCTCTTAACCACCTCAACAACACTGGCCTTGCCGATACGGCCTTTTTTGGGTCCAGAA…	464
305905	CAM_READ_0167305905	0.6	0.4	2	0	0	0	0	0.4	0	0	0	0	0.4	3.8	0	0	NA	NA	Synechococcus sp. CC9311	84	443	glnA	glutamine synthetase, type I	Amino Acid Metabolism	Environmental	ATCAGACACGCCCTTTTATCGGCATAAAACCCTGAGCATGATCTGCTCAATTCAGGATCCGCGAACTCATCAACCTTTTGACCGTTGCCCGCGTGCATTAGCCCAGAAAGCATTGGCTTATCTCGCCAATACAGGTCTTGCAGACAAGGCATTTTTTGGTCCCGAGCCTGAGTTCTTCCTTTTCGATGATGTTCGCTACAACTCAAGCGAAGGCAGCTGTTTCTACAGCGTTGACACCATTGAGGCTGGCTGGAACTCCGGAAGAGTAGAAGAAGGTGGAAACCTCGCTTATAAAATCCAAACCAAGGAGGGTTACTTTCCTGTTGCACCAAACGACACAGCTCAGGATATTCGCTCTGAGATGTTGCTAATGATGGCGCAATTGGGGATTAAAATTGA…	425
400627	CAM_READ_0164400627	0	0	3.75	0	0	0	0	0	0	0	0	0	0	3.75	0	0	NA	NA	Synechococcus sp. CC9311	84	495	glnA	glutamine synthetase, type I	Amino Acid Metabolism	Environmental	TGCTCGGTGAAGACGAGTTTTCGGGAGGTTTTGGCCTTTGACGGCTCTTCGATTCGTGGCTGGAAAGCAATCAATGAGTCGGACATGTCCATGGTTCCAGACCCTTCAACAGCCTGGATTTGATCCCTTTTTATCGGCATAAAACCCTGAGCATGATCTGCTCAATTCAGGATCCGCGAACTCATCAACCTTTTTGACCGTTGCCCGCGTGCATTAGCCCAGAAAGCATTGGCTTATCTCGCCAATACAGGTCTTGCAGACAAGGCATTTTTTTGGTCCCGAGCCTGAGTTCTTCCTTTTCGATGATGTTCGCTACAACTCAAGCGAAGGAAGCTGTTTCTACAGCGTTGACACCATTGAGGCTGGCTGGAACTCCGGAAGAGTAGAAGAAGGTGGAAA…	512
13731	S9902_13731	1.6	2.6	1.2	0.4	0.4	0.4	0.8	0.2	0.8	1.2	0.2	0.2	1	11	2	Yes	0.4955	4.56315	Synechococcus sp. CC9902	100	2819	glnA	glutamine synthetase, type I	Amino Acid Metabolism	Genomic	ATGGCCAAAACCCCTCAGGAGGTCCTTCGTCAAATCAAGGACGAAGGCATAGAGCTGATTGATCTCAAATTCACTGACCTTCACGGCAAGTGGCAGCACCTGACGGTGTGCACTGACTTACTGGAGGAAGAGTCGTTCACCGAAGGACTGGCCTTCGATGGATCCTCCATTCGTGGATGGAAGGCCATTAACGCCTCGGATATGGCGATGGTGCCTGATCCAAGTTCCGCCTGGATCGATCCGTTTTACCGCCATAAAACCTTGAGCATGATTTGCTCAATTCAGGACCCTCGCACCGGTCAGGATTACGACCGTTGTCCTCGAGCACTGGCGCAACGCGCTCTCAACCATCTCAACAACACCGGACTTGCCGACACGGCGTTTTTCGGCCCAGAGCCT…	1422
5001	S9902_05001	1.5	1.17	4.17	0.67	0	0.83	0	0	1.67	0.17	0	1.5	1.5	13.18	1	Yes	0.806905	2.26195	Synechococcus sp. CC9902	100	672	glnB	nitrogen regulatory protein P-II	Signal Transduction	Genomic	ATGAAAAAGGTTGAAGCAATTATTCGCCCCTTCAAATTGGAAGACGTCAAGGTGGCGTTAGTGGAAGCCGGCATCATCGGCATGACCGTCAGCGAAGTCCGTGGTTTTGGCCGTCAAAAAGGGCAAGTGGAGCGCTACCGCGGCTCGGAATTCACTGTGGAATTCCTTCAAAAGCTGAAAATTGAAGTGGTCGTTGAATCCAACCGTGTCGATGAGGTGGTCACCGCCATCGCTGATGCAGCCCGCACCGGAGAGATCGGCGACGGCAAGATCTTCATTTCATCTGTGGAGTCTGTGGTTCGCATCCGCACGGGAGATCGCGACGGCACAGCCCTCTAA	339
646953	CAM_READ_0163646953	0	0.5	1	0.5	1.5	0.5	0	0	0	0	0	0	0	4	0	0	NA	NA	Synechococcus sp. CC9902	88	594	icd	isocitrate dehydrogenase	Carbohydrate Metabolism	Environmental	CCCTGGTGCACAAGGGCAACATAATGAAGTTCACAGAGGGAGCCTTCCGAGACTGGGGCTACGAGCTCGCCACAACGGAGTTTCGTGAGGTGTGCATCACGGAACGAGAGAGCTGGATCTTGGGCAATCTCGAGAAGGATTCAACGCTGAGCGTGCAAGACAACGCCCGCATGATCGAGCCGGGTTACGACAGCCTCACCCCCGAGAAACAATCCGATCTCGATGCCGAAGTTCAGGCCGTGATCGATGCCATCGGCAGCAGCCATGGCCAGGGAAAGTGGAAGGAGATGGTGCTGGTTGACGACCGCATCGCCGACAGCATTTTTCAGCAGATCCAAACCCGCCCGCAGGAGTATTCGATCCTGGCAACGCTGAACCTGAACGGGGATTACATCTCTG…	482
737190	WesternChannelOMM_READ_06737190	2.5	4	1	1	1	0.5	4	4.5	2	1	1.5	1.5	2	26.5	0	0	NA	NA	Synechococcus sp. CC9902	83	477	idiA	iron ABC transporter, substrate binding protein	Membrane Transport	Environmental	GTGGATGCTGCTCGTATTAACAATGACCGCAAAAGAAGGACTATTAGCGCCCATTCAGTCAGAACAAATACAAAAAGAATGTTCCTGCACGATATAGAGATCCAGGGAATCAATGGTTTGGCCTCACGCGTCGCGTGAGAGCAATCATTGTTAATCCAAAGCTCGTTGATCCAAACAGCATCAAAACATATGCAGACCTCGCCAATATAAATCTGAGAGGGAAATTATGCCTTCGCAAACGCAAAAACGTATACAATCAGTCTCTTGTAGCAGATCAAATTGTCTTAAAAGGACAAACCAATGCAACAAACTGGGTACAAAAACATGGTCGCGAATGTCAATCAACCATTTTTCGGCGGAGATACATCACTGATCAGAGCTGTAGGACAGGGAAAGTGT…	477
700111	CAM_READ_0164700111	1	1.83	0.5	0.17	0	0	0.5	1	0.5	0.5	0.17	0.67	2.83	9.67	0	0	NA	NA	Synechococcus sp. CC9311	88	655	idiA	iron ABC transporter, substrate binding protein	Membrane Transport	Environmental	TAAGTCTACAATCAATCACTTGTTGCTGATCAACTAGCGCTAAAGGGCACAACCAAGGTTAAATCATGGCTGAAAGGCCTTACAAGCAATGTAAGCCAGCCATATTTCGGTGGAGATATCGGGCTCATTCGGGCTGTTGCCCAAGGACAGTGTGGCGTTGGAGTAGTGAATCACTATTATCTAGCGCGAATGAGAGCAGGGGTTAACGGAAAAAAAGATCAACAATTGGGTAATGATGTTAAAATTGTGATGCCAAACCCTGCTCACGTCAACATTAGCGCTGCTGCGGTTTCTCGTTATTCTAAAAACCAGAAAAATGCGGTCAAATTGATTGAATTTCTGTCATCTCCTCAAGGAAGCGCTGGTATTGCAGGTCCTACCTATGAGTTCCCATTACAA…	521
939205	CAM_READ_0164939205	0.8	2.2	0.4	0.6	0.2	0	0.4	0.8	0.2	0	1	0.8	0.8	8.2	0	0	NA	NA	Synechococcus sp. CC9902	86	527	idiA	iron ABC transporter, substrate binding protein	Membrane Transport	Environmental	CGTTTTTGCTGGCTGTCTTGGCATTAGGGATGCCGCTAGCCATCACACTACCTGGCTTCTCCAAAGAGGTTCGCGTTTACTCAGGTCGGCACTACAACACTGATCGTACAGGTTTTTAAAAAATTTAGCGAAAATACTGGGATTAAGGTTCGATTAATTGAAGCAACTGGCATCACTCTAATTGAAAGACTGAAACGCGAAGGGAAGAACTCAAATGCAGACGTCATTTTACTTGTGGATGCTGCTCGTATTAATAATGCCGCAAAAGAAGGACTATTAGCGCCCATTCAATCAGAACAAATCAAAAAGAATGTTCCAGCACGATATAGAGATCCAGGGAACCAATGGTTTGGCCTCACGCGTCGTGTAAGAGCAATCATTGTTAATCCAAAGCTCGTT…	464
243677	CAM_READ_0162243677	3	0	0.5	0	0.5	0	0	0	0	0	0.5	0	1.5	6	0	0	NA	NA	Synechococcus sp. CC9311	84	352	idiA	iron ABC transporter, substrate binding protein	Membrane Transport	Environmental	ACGCTCGACACATTACAATACTGACCGCCAAGTTTATAAAAAGTTTTCAGATCAGACTGGAATCAAGGTTCGTTTAATAGAGGCATCAGGGATTTCCTTGGTTCAAAGATTGAAAAGTGAAGGCAAAAACACAAAGGCTGATGTAATCATTTTAGTTGATGCTGCGCGCATCAACAATGCCGCCAATGCTGAACTCTTTGCACCAATTCAATCTTCTTCTCTAGAGAAGTCTGTTCCGTCACGCTACCGAGATCCAGACAACAGGTGGTTTGGTTAACTCGACGAGTGCGGGCAATCATCGTTAATCCAACAATGGTTTCTCCATCTTCAGTGACGTCA	339
625244	WesternChannelOMM_READ_04625244	2	0.17	0	0.17	1.17	0	1	0	0.17	0	0	0	0.67	5.35	0	0	NA	NA	Synechococcus sp. BL107	97	773	idiA	iron ABC transporter, substrate binding protein	Membrane Transport	Environmental	ATCTGAAAGGAAAACTATGCCTTCGTAAACGCAAGAATGTATACAACCAATCCCTTGTTGCAGATCAAATTGTCTTAAAGGGAGAAGCTAATGCAACAAACTGGGTGAAAGGTATGGTCAAAAATGTGAATCAGCCATTTTTTGGTGGAGACACATCTCTGATCAGAGCCGTCGGGCAAGGCAAATGCGCTGTGGGTGTTGTTAATCACTATTACTTAGCCCGAATGCAAGCTGGTGCGAGCGGAGAAAATGATCAGAAACTTACCCAGCCAATAAAGTTAATCATGCCAAATCCTGCCCATGTGAATATCAGTGCTGCCGGAATGGCAAAAATCTGCCAAAAACAAAAAGGAAGCAATCGCATTAATTTCTTTTCTAACATCACCAAAAGGCAGTTCA…	461
992786	WesternChannelOMM_READ_05992786	1.8	0	0	0	1	0.4	0	0.6	0.8	0.8	0	0	2.4	7.8	6	Yes	0.823444	1.96962	Synechococcus sp. CC9902	97	630	idiA	iron ABC transporter, substrate binding protein	Membrane Transport	Environmental	CGGACAAAACGATCAGCAACTCACCCAGTCAATCAAGTTGATCATGCCAAACCCGGCCCATGTAAATAATCAGTGCGGCCGGCATGGCAAAATACCGCCAAAAATAAAAAGGAAAGCAATCGCATTGATTACATATCTAACATCGCCAAAGGTAAGTGCATCGATTGCTGGACCAACCTACGAATATCCTTTGAATGGTTTTGGAACAGCGAGCCAACTGAAGAATTTTGGTCGCTTCAATCCAGACAATGTATCGATCAGCCAACTAGGAGAAACACAAAAAGGGCCATCCAGATCATGGCAAACAGTGGATGGCGTTAATCTCAGAAACTAATTAATAGTGGAACATGGCGACGAGCATCGCCATGGTTTCTGATAATGACT	384
821567	CAM_READ_0164821567	12.67	11	7.67	6.67	13	9.33	11.67	8.67	4.67	18	6.33	9.33	12.67	131.68	0	0	NA	NA	Synechococcus sp. CC9902	87	609	isiB	Flavodoxin	Energy Metabolism	Environmental	TTGGCTCTTCTGACGAACTTGTTGCGGCTGATGCACTCGTTTGCTGCGTTCCGACATGGAACACAGGCGCTGACGAAGGAAGATCTGGAACGGCATGGGATGATCTTGCACAAGAGATTCCCAATCTTGATTTCGCCGGTAAATCCGTCGCTATTCTTGGTTTAGGTGATTCCTCTGGCTATTCAGATTTTTTCTGTGATGCCATGGAAGAACTCTATACAGCTTTTCTTCAATCTGGTGCCAAGTTAATTGGTAAGGTTCCTACCGCTGGCTATACCTTTGATTCCTCGAAGAGCGTTATAGATGGAAAATTTTGTGGTCTTCCGATTGATGAAGATAATGAATCTGAGCTGTCAGATCAACGCCTATCAGCTTGGGTTCAACAGATTAATAGTGAGG…	500
802909	CAM_READ_0164802909	0.5	0.5	0.67	1.83	1.17	0	0	1.33	1.17	3.5	1.33	0.33	0	12.33	0	0	NA	NA	Synechococcus sp. CC9902	88	603	isiB	Flavodoxin	Energy Metabolism	Environmental	GGTAAACGGAAGACGTAGCAGACCGCTTGAAGAACTTCTTCCAGGTGCAGAAGCTAAGATGTTGATAATCTTGGCTCTTCTGACGAACTTGGTTGCGGCTGATGCACTCGTTTGCTGCGTTCCGACATGGAACACAGGCGCTGACGAAGGAAGGTCTGGAACGGCATGGGATGATCTTGCACAAGAGATTCCAAATCTTGATTTCGCCGGCAAATCTGTGGCTATTCTTGGCTTAGGTGATTCCTCTGGCTACTCAGATTTTTTCTGTGATGCAATGGAAGAACTCTATACAGCTTTTCTTCAATCTGGTGCCAAGTTAATTGGTAAGGTTCCTACTGCTGGCTATACCTTTGATTCCTCGAAGAGCGTTATAGATGGAAAATTTTGTGGTCTTCCGAT…	486
743062	JCVI_READ_1091145743062	0.83	3.33	1.17	1.67	0.67	0.83	0.83	1.17	1.33	2.5	1.83	1.67	1.5	19.33	5	Yes	0.577705	3.70827	Synechococcus sp. CC9902	93	930	isiB	Flavodoxin	Energy Metabolism	Environmental	TCATGACTTTCACCATTTTTTTTGCGACATCAACTGGTAAAACCGAAGACGTCGCAGACCGTTTGAAAGAGCTTCTTCCGGGTGCAGAAGCAAAAGATGTTGATAATCTTGGCTCCTCTGACGAACTGGTCGCGGCTGATGCACTCGTGTGCTGTGTCCCGACTTGGAATACGGGAGCCGACGAAGCAAGGTCTGGAACAGCATGGGATGATCTTGCTCAAGAAATTCCAAATCTTGATTTTGCAGGCAAATCTGTTGCGATTCTTGGGCTAGGTGATTCCTCTGGCTATTCAGATTTTTTCTGTGATGCTATGGAAGAATTGTATACAGCTTTTCTTCAGTCTGGGGCTAAACTTATTGGTAAAGTGCCTACAGCTGGTTATACGTTTGATGCCTCTA…	618
764815	CAM_READ_0164764815	3.67	1	2.33	0	0	0	1	1.67	1.33	0	0	0	0.67	11.67	0	0	NA	NA	Synechococcus sp. CC9902	89	479	kaiC	circadian clock protein KaiC	Unclassified	Environmental	CGCCTTTCGTCAATTCGTAATTGGCGTCACTGGGTATGCAAAACAGGAGGAAATTGCAGGGTTTTTCACCAATACATCTGAGGAATTTATGGGGAGTCACTCGATCACTGATTCCCATATTTCCACGATTACTGACACCATTCTGTTGCTTCAATATGTAGAGATTCGCGGTGAAATGGCCCGCGCTCTCAATGTGTTCAAAATGCGTGGATCATGGCATGACAAGGGCATACGCGAATTTGTGATCACCGGAAATGGTCCGCAGATCAAAGATTCTTTCTCCAACTTTGAGCGGATTATCTCGGGTGTACCCCATCGCGTATCCACCGATGAGCGCAGCGAACTTTCGCGAATAGCGAGGAGTATGTCTT	371
528073	CAM_READ_0164528073	2.4	1.2	1.4	0.2	0.2	0	1.6	1	1.4	0.4	0	0.2	1	11	0	0	NA	NA	Synechococcus sp. CC9902	88	605	kaiC	circadian clock protein KaiC	Unclassified	Environmental	CATCTTCGTCACCTTTGAAGAATCACCGCTCGACATCCTGCGGAATGCTGCAAGCTTCGGCTGGAATCTTCAGGAGATGGTGGAACAGGACAAGCTATTTATTTTGGATGCTTCTCCGGATCCCGATGGGCAGGATGTTGCCGGCAGCTTTGATCTTTCGGGTCTGATTGAGCGGATCAATTATGCGATTCGCAAATACAAAGCGAAGCGTGTTGTGATCGACTCAATCACTGCAGTTTTCCAACAATATGATGCCGTATTTGTTGTTCGTCGTGAAATCTTTCGCCTGATTGCTCGGCTGAAGGAAATTGGCGTTACCACGGTGATGACCACCGAGCGCATTGACGAATATGGACCGATCGCTCGGTACGGAGTAGAGGAGTTTGTTTCCGACAATGT…	489
996285	CAM_READ_0161996285	1.2	3.4	0.6	1	0	0	0.8	0.4	0	0.4	0	0	0.8	8.6	0	0	NA	NA	Synechococcus sp. CC9902	89	500	kaiC	circadian clock protein KaiC	Unclassified	Environmental	TTATGCAATTCCCTTCCGCTAGCGGTCAGTCACAAATGCAGGTCCAGAAGCTCGCAACGGGGATTGAGGGCTTTGATGATGTCTGTCACGGTGGGCTGCCAATCGGGCGCAGCACCCTGATTAGCGGAACGTCCGGCAGCGGTAAAACTGTTTTATCACTGCATTTTCTACATAATGGAATCAAGCATTTCGAAGAGCCAGGTATCTTCGTCACTTTTGAAGAATCACCGCTCGACATCCTTCGGAATGCTGCCAGTTTCGGCTGGAATCTTCAGGAGATGGTGGAACAGGACAAGCTCTTTATCTTGGATGCTTCTCCGGATCCCGATGGGCAGGATGTTGCCGGCAGCTTTGATCTCTCGGGTCTGATTGAGCGGATCAATTGTCGAGCGT	393
586579	CAM_READ_0164586579	0.4	1.2	1	0.2	0.2	1.2	0.6	1	0.4	0.2	0	0	0.2	6.6	0	0	NA	NA	Synechococcus sp. CC9902	87	607	kaiC	circadian clock protein KaiC	Unclassified	Environmental	ATCGACTCAATCACTGCAGTTTTCCAACAATATGATGCCGTATTTGTTGTTCGTCGTGAAATCTTTTCGCCTGATTGCTCGGCTGAAGGAAATTGGCGTTACCACGGTGATGACCACCGAGCGCATTGACGAATATGGACCGATCGCTCGGTACGGAGTGGAGGAGTTTGTTTCCGACAATGTCGTGATTCTGCGCAATGTGCTCGAAGGGGAACGCCGTCGACGCACGGTGGAAATCCTCAAATTGCGTGGCACAACGCATATGAAAGGAGAGTTCCCTTTCACGATGGGTGCCAATGGCATCAGTATTTTCCCGCTGGGTGCAATGCGACTCACCCAACGTTCATCCAATGTGCGGGTGAGCTCTGGAGTGCCCCGGCTGGATGAGATGTGCGGTGG…	499
57523	CAM_READ_0165057523	0.75	0.5	1	0	0	0.25	0.75	1	0.5	0.75	0	0	0.25	5.75	0	0	NA	NA	Synechococcus sp. CC9902	87	581	kaiC	circadian clock protein KaiC	Unclassified	Environmental	GATGGGCAGGATGTTGCCGGCAGCTTTGATCTTTCGGGTCTGATTGAGCGGATCAATTATGCGATTCGCAAATACAAAGCGAAGCGTGTTGTGATCGACTCAATCACTGCAGTTTTCCAACAATATGATGCCGTATTTGTTGTTCGTCGTGAAATCTTTCGCCTGATTGCTCGGCTGAAGGAAATTGGCGTTACCACGGTGATGACCACCGAGCGCATTGACGAATATGGACCGATCGCTCGGTACGGAGTGGAGGAGTTTGTTTCCGACAATGTCGTGATTCTGCGCAATGTGCTCGAAGGGGAACGCCGTCGACGCACGGTGGAAATCCTCAAATTACGTGGCACAACGCATATGAAAGGAGAGTTCCCTTTCACGATGGGTGCCAATGGCATCAGT…	482
186495	CAM_READ_0165186495	0.5	0.75	1.75	0	0	0	0	0.5	1	0	0	0.25	0	4.75	0	0	NA	NA	Synechococcus sp. CC9902	87	508	kaiC	circadian clock protein KaiC	Unclassified	Environmental	CAAGACAATGTTGGTGTCCAAGTTATTGTAGAATGCCTGCCGCAGTAAGGAACGTGCCTATCCTTTTTGTCCTATGAAGAATCCCGTGCTCAGCTAATGCGAAATGGCAGTAGCTGGGGGATTGATTTGAGCAGATGGAGCAGGACGGGCTGCTGAAGATTATTTGTGCCTATCCCGAATCCACTGGATTGGAGGATCATCTTCAAATCATCAAAACTGAAATCAGTGAATTCAAGCCATCACGAATGGCGATCGACTCCTTATCTGCTTTAGCCCGTGGTGTGAGTCATAACGCCTTTCGTCAATTCGTAATTGGCGTCACTGGCTATGCAAAACAGGAGGAAATTGCAGGCTTTTTCACTAATACATCTGAGGAGTTTATGGGGAGTCACTCGATCA…	434
5871	S9902_05871	0.6	2.6	0.8	0.2	0	0	0.8	0.4	0.6	0.6	0	0.2	0.8	7.6	2	Yes	0.132857	6.91585	Synechococcus sp. CC9902	100	3051	kaiC	circadian clock protein KaiC	Unclassified	Genomic	ATGCAATTTCCTCCCGCTAGCGGTCAGTCACAAATGCAGGTACAAAAGCTCGCAACGGGAATTGAGGGCTTTGATGATGTTTGTCACGGTGGACTTCCAATTGGTCGAAGCACCCTGATCAGCGGAACGTCCGGCAGCGGTAAAACGGTGTTATCGCTTCACTTCCTCCATAACGGAATTAAGCATTTCGAAGAGCCGGGTATTTTCGTCACCTTCGAAGAATCACCGCTCGACATCCTGCGCAATGCGGCCAGCTTCGGATGGAATCTCCAGGAGATGGTTGAACAAGACAAACTGTTCATTTTGGATGCCTCTCCTGATCCCGATGGTCAGGATGTGGCCGGCAGCTTTGATCTCTCGGGTCTGATTGAGCGAATCAATTATGCGATTCGCAAATAC…	1539
142543	CAM_READ_0163142543	0	1.5	0.5	0	0	0	0	0	0	0	0	0	1	3	2	Yes	0.505	4.42567	Synechococcus sp. CC9902	89	576	metC	Cystathionine beta-lyase family protein involved in aluminum resistance	Amino Acid Metabolism	Environmental	GCACCCATGCAATTACGGCAGCTTTGTTTGGTGTGCTGAGGCCTGGTGATCGTTTGCTTTCGATCACAGGTCGTCCCTACGAAACCCTTGAGGAAGTCATCGGTTTAAGGGGAACGGATCAGGGGTCGTTAGCCGACTTTGGGATCGATTACGACGAAGTGCCATTAACGCCTGAGGGGGCTGTGGACCGGTTGGGTCTGGACCAAGCGCTGGCTTTTTCCTCAGCGCATGGTGCTGATTCAACGCAGTTGTGGCTACAGCTGGCGCCCATCGTTGTCGGTGAAGGAAATCGGTGAGCTCTGCTCCCTTATTCATGCGCGTCAGCCCCATTGCATCTGTTTTGTCGACAATTGCTACGGAGAATTGGTGCAGGACTGTGAGCCGCCAGAGGTCGGAGCC…	442
666375	CAM_READ_0164666375	0	0	1.75	0	1.5	0	0	0	1	1	0	0	0	5.25	0	0	NA	NA	Synechococcus sp. CC9902	88	513	ndhI	NADH dehydrogenase subunit I	Energy Metabolism	Environmental	AGATGTTCGGATTCCTTAAACAGGTCGGTGACTACACCCGGGACGCCGTAGATGCCGCCCGTAATTTGGCGCAGGGTTTTGCGGTCACCTTTGACCACATGCAGCGCCGCCCCGTCACGGTTCAATATCCCTACGAAAAGCTCATTCCTTCGGAGCGCTATAGGGGGAGGATTCACTACGAGTTCGATAAGTGCATTGCCTGTGAGGTGTGTGTCAGGGTTTGCCCGATCAACCTCCCGGTGGTCGATTGGGTAATGAATAAGGCCACCAAGAGAGGAGTTGCGCAATTACTCCATTGATTTTGGNGTTTGCATTTTTGTGGAAATTGTGTCGAGTACTGCCCGACCAATTGCTTGTCGATGACCGTAAGAATATGAATTAGCAGCATTTGACCGCCAT…	408
28909	CAM_READ_0164028909	0	0.33	2.67	0.67	0.33	1.33	0	1	0.67	1.33	0.33	1	0.33	9.99	3	Yes	0.821477	2.05123	Synechococcus sp. CC9902	91	690	ndhI	NADH dehydrogenase subunit I	Energy Metabolism	Environmental	CGTATGACCGAAGAATATGAATTAGCAGTCATTTGATCGCCATAGCCTCAATTACGACAACGTTGCTCTTGGTCGTTTGCCCACGAGCGTGACGACCGACCCATCCGTGCAGCCTCTGCGAGAGCTCGTGTATCTCCCCGCTGGGGAAATGGATCCTCACACCGTTCCAGCTGATCGTCCCCGCGCTGGCAAGCTTCCTGCTGAAGTGTTGGAAACCCTTGCTCCAGTCAAGGATGAGGGACAATCCTCCAAGGCTGCTTTGAAGGAGGACGCATGACTATCGCGACAAGCACTGAACTGATTTGCTTTCTGGTGCTTTCCGTTGTCGTTGTGGCCGGGGCACTTGGTGTGGTCCTCCTGAGCAACATTGTTTATTCGGCCTTCCTCCTTGGTGGAGTG…	502
267066	JCVI_READ_1091143267066	1.33	0.33	0.33	0.67	0	0	0.33	0.33	0.33	1	1	0	1.67	7.32	5	Yes	0.857938	1.51962	Synechococcus sp. CC9902	96	1404	ndhI	NADH dehydrogenase subunit I	Energy Metabolism	Environmental	GCATGACTATTGCGACAAGCACGGAACTGATTTGTTTTCTAGTGCTGTCCGCTGTCGTCGTGACCGGCGCGCTTGGTGTTGTCCTTCTCAGCAACATTGTTTACTCAGCCTTCCTCCTTGGTGGAGTGTTTATGGCAGTGGCTGGTCTTTATCTGCTCTTGAACGCCAGCTTCGTTGCGGCGGCACAAGTGATGATCTACGTCGGTGCCATCAACGTTTTGATCTTGTTCGCGATCATGCTCGTGAACAAGCGGGAAGATCTCAAGGCGATCGCCAACCTCACCACCCGTCGGATTGTGTCGGGTGGAGTTTGCTTAGGACTTCTAGCCCTCTTAGTGCGCGTGGTGGTGACAACACCCTGGTCCCTGCCTGGACCAGCTGCGGTGGGAGAAGAAGCTA…	866
817465	CAM_READ_0164817465	0	1	2	0.5	0	0.5	0	0	0.5	0.67	0	1.17	0	6.34	1	Yes	0.774935	2.62638	Synechococcus sp. CC9902	91	675	ndhI	NADH dehydrogenase subunit I	Energy Metabolism	Environmental	ATTCGATTTTGGTGTTTGCATTTTCTGTGGAAATTGTGTCGAGTACTGCCCGACCAATTGTTTGTCGATGACCGAAGAATATGAATTAGCAGCATTTGATCGCCATAGCCTTAATTACGACAACGTTGCTCTTGGTCGTTTGCCCACGAGCGTGACGACCGACCCATCCGTGCAGCCTTTGCGAGAACTCGTGTACCTCCCCGCTGGGGAAATGGATCCCCACACCGTTCCAGCTGATCGCCCCCGCGCTGGCAAACTTCCTGCTGAAGTGTTGGAAACCCTTGCTCCAGTTAAGGATGAGGGACAATCCTCCAAGGTTGCTTTGAAGGAGGACGCATGACTATCGCGACAAGCACTGAATTGATTTGCTTTCTGGTGCTGTCCGTTGTCGTTGTGGCC…	491
26841	S9311_26841	0.5	0.5	0.25	0	0	0	0.25	0	0	0.75	0	0.5	0.75	3.5	7	Yes	0.736533	2.82533	Synechococcus sp. CC9311	100	1308	ndhI	NADH dehydrogenase subunit I	Energy Metabolism	Genomic	ATGTTCGGCTTCCTTAAACAGGTTGGTGATTACACCAGGGATGCAGTGGATGCGGCCCGTAATCTCACGCAAGGCCTGTCGGTCACCTTCGATCACATGAAGCGCCGTCCGGTCACGGTGCAATACCCCTACGAAAAGCTGATTCCCTCGGAGCGCTATCGAGGACGCATTCATTACGAGTTCGATAAGTGCATTGCTTGTGAGGTCTGTGTGAGGGTGTGTCCCATCAATCTCCCAGTGGTTGATTGGGTGATGAACAAGGAAACGAAGAAAAAAGAGCTACGCAATTACTCGATTGATTTTGGGGTTTGTATTTTCTGTGGCAACTGCGTTGAGTACTGCCCCACCAATTGCTTATCGATGACCGAAGAATATGAATTGGCTGCCTTCGATCGCCAT…	660
24651	S9902_24651	0.25	0	0	0	0	2	0.5	0	0	0	0	0.25	0	3	3	Yes	0.571429	4.08834	Synechococcus sp. CC9902	100	3009	nirA	Ferredoxin-nitrite reductase	Energy Metabolism	Genomic	ATGACAGCCAGCTCCCCATCCAAGCCCTATCTAGATGGCAAGAAACTGAACAAGATTGAGCAAAAAAAAGCCGATAAGGACGGCCTACTCATCGGAACCGAAATTGATCAGTTTGCTGAGCTGGGTTGGGAGAAAGTAGACGAGACAGATTTACAACTCCGACTGAAGTGGTACGGCATGTTTTGGCGCCCCAAAACGCCGGGCAAGTTCATGCTTCGACTCAGAGTTCCAAACGGTGTGTTGTCGTCTCAACAGCTAAGGGTCGTTGCATCAATTGTTGAGCGTTACGGAGAGAATGGAAGCTGCGATATCACAACACGCCAGAATCTTCAGCTCCGTGGTGTCTTGCTTGGAGATTTTCCTGAAATTCTCAAACGCTTAAAAGAAGTAGGCTTGAGT…	1542
551858	WesternChannelOMM_READ_01551858	0.5	1	1.5	0	1	0.5	0	1	2	1.5	0.5	0.5	2	12	6	Yes	0.662703	3.08023	Synechococcus sp. BL107	94	713	sodN	putative nickel-containing superoxide dismutase precursor	Unclassified	Environmental	ACAATGTTGCGCTCGGCCCTCAACGCCATTGTCTGCGCTCTGCCAGCTTCCGTCGTGGAAGCCCATTGCGATGGTCCTTGCGGCGTCTACGACCCCGCTTCCGCGCGTGTTCACGCTGAAGCGGTGCTCGCCATGACGAAAAAGCTCAAGGCTTTGGAAGCACCTGCTGCAGGAAATGCTGCAGCGCTTGCCACTTACAACAACACCTTCTCCCGCTTCGTTGCGGTCAAAGAAGACGAAGCCCAAAAGACCAAGAAAGAATTGTTGATCCTTTGGACCGACTACTTCAAGCCAGAGCACCTCGCCACTTTCCCCGATCTCCACGACACCTTCTGGAAAGCGGCCAAGCTTTGCAGCGCCTGCAAGGTGCACATCGACCAAGGCAAAGCCGAGGAACTG…	476
111937	WesternChannelOMM_READ_05111937	1.5	1.5	3.5	0	0.5	0.5	0	0	0.5	1.5	0	0	2	11.5	1	Yes	0.755263	2.73376	Synechococcus sp. CC9311	91	574	sodN	putative nickel-containing superoxide dismutase precursor	Unclassified	Environmental	ACCCTGCGGTGTCTATGACCCTGCTTCAGCTCGTGTTCACGCTGAAGCAGTGCTCGCGATGACTAAAAAGCTCAAGGCTTTGGAAGCGCCTGCAGCCGGAAATGCTGCAGCTCTTGCCACCTACAACAACACCTTCTCCCGCTTCGTTGCGGTCAAGGAAGACGAAGCCCAAAAGACCAAGAAGGAACTCTTGATCCTTTGGACCGACTACTTCAAGCCCGAGCACCTAGCAACGTTCCCCGATCTCCACGACACCTTCTGGAAAGCGGCGAAACTTTGCAGCGCCTGCAAGGTGCACATCGACCAAGGCAAAGCGGAAGAGCTTCTCGCCGCTGTTGAGAAAATCCACGGCATGTTCTGGCAGTCCAAAGGCCGCTCTGACGCCTGGGTGACCGCCTC…	419
347589	CAM_READ_0165347589	4.67	4.33	5	0.17	0	0.5	2.17	0	1.33	0.5	0	0	2.67	21.34	0	0	NA	NA	Synechococcus sp. CC9311	88	654	petF	Ferredoxin	Energy Metabolism	Environmental	TGTCATGGCTCTTTCACGATCAGCATCGAAGTGGATCCAGCTTCAGCTGCGCCGATGATCAATACATCCTTGATGCTGCTGAAGAGCAAGGCATTGATCTCGCCTATTCCTGCCGTGCTGGCGCGTGCAGCACATGCGCCGGAAAAATCCTCAACGGAAGCGTTGATCAGGCTGACCAAAGCTTCCTGGATGAGGAGCAAATGTCGAAGGGCTTTGCCTTGCTTTGTGTGAGCTATCCGCTGAGTGATTGCTCGATCAAGTCCAACGTGGAAGACGAGCTGTAAGCGAGCTTGATCACGTCAGGGGTTTCTCCATGGGTCTGGCCGATTAACAAGGCATGGCTCACGGCCC	351
541989	CAM_READ_0164541989	3	0.5	0.75	0	0.75	0	1.5	1.5	1	0	0.25	0	0	9.25	0	0	NA	NA	Synechococcus sp. CC9311	87	492	petF	Ferredoxin	Energy Metabolism	Environmental	GTTTTCAATTGCCCAGATGATCAATATATCCTTGATGCTGCTGAAGAGCATGGAATTGATATGCCGTATTCCTGTCGAGCAGGTGCATGCTCAACTTGTGCTGGGAAGGTAACGACTGGCTCTATCGATCAAAGTGATCAAAGCTTCCTGGATGATGACCAGCTTGCTGCAGGTTTTGCCCTTTTATGTGTTTCGTATCCCGTTAGTGACTGTTCAGTGTCTGCAAATGCAGAAGATGAACTTTATTGAGTTAATACTTGCTTAGTAGAGAGATACTAGCCAGAATGAGATGGCCTGCTGAATAGTTTTTTCTAGCTTCTTGAATGCGGAGAATTAGTAAAATTTGTCAATTATGCTT	358
23121	S9311_23121	0.5	1	0	0	0	0	0	0	0	2	1	0	1.5	6	5	0	0.806706	2.22864	Synechococcus sp. CC9311	100	827	petF	Ferredoxin	Energy Metabolism	Genomic	TTGATTGGGCTTGAATGGAAAACCCTGATGAATCCCGTATCAAGGCGTCTGTCCGATATAGAAAGGACCGGTCCAGCAGATTCAGATCGATCCGATCTCTGCGCATTACATCCATCCATGGCTTCTTATAAGGTCACCCTGGTCAGCGAGAGCGAAGGCCTCAACAAGACCATCGAAGTTCCTGACGATCAGTACATCCTCGATGCTGCTGAAGAGCAAGGTATCGATCTTCCCTATTCCTGCCGTGCAGGCGCTTGTTCCACTTGCGCAGGCAAAATCACTGCAGGCACTGTTGATCAGTCCGACCAGAGCTTCCTGGACGACGACCAGATTGAAGCTGGTTTCGTTCTGACCTGCGTGGCTTACCCCACCTCTGATTGCACCATCAAGACTCACGCT…	417
755669	CAM_READ_0163755669	0	0.2	0.8	0.6	0	0	0.2	0	0.8	0.2	0.2	0	0	3	0	0	NA	NA	Synechococcus sp. CC9902	83	383	petF	Ferredoxin	Energy Metabolism	Environmental	GGATGTCTGACACATCAGCGGTGGTGGCCATTTATTCCGTGTCCGCTGAAATTGAGGGTGAAGTCCACCAATTCCCCTGTCGAGAGGATCAAACGGTGTTGAACGGAGCCGAGGCCGCGAATATCAGCCTTCCTAGTTCTTGCTGTACAGGTGTCTGCACCACATGTGCGGCCGTGATTACGGCGGGCAATGTGTATCAGCCAGATGCCATGGGTCTTCGATCCGACCTTCAGGAGCATGGCTATGCCCTGTTGTGTGTGTCCTATCCCCGTGCTGACCTCACTCTCAAAACGGGTCAAGAAGATGCTTTATACGAAGCTCAGTTTGGTCAGTTTCAAAAGTGAAGCTGCTTCGCCTGCAGCGTCAG	367
179491	CAM_READ_0165179491	0.83	0.83	0.67	0.33	0.67	1	1.33	0.33	0.67	0.33	0.17	5.33	8	20.49	6	Yes	0.351481	5.36492	Synechococcus sp. CC9902	93	630	petF	Ferredoxin	Energy Metabolism	Environmental	AGAGCGAAGGTCTTAACAAGACCATCGAAGTCCCTGATGATCAGTACATCCTCGATGCAGCAGAAGAGCAAGGCATCGACCTGCCTTACTCCTGCCGCGCTGGCGCTTGCTCGACTTGCGCCGGCAAACTCACCGCTGGCACCGTTGATCAATCCGACCAGAGCTTTCTGGACGATGATCAAATCGAAGCCGGCTTCGTGCTCACATGCGTGGCTTACCCCACCTCCGACTGCACCATCAAGACCCACGCTGAAGAAGAGCTCTATTGAGCCTTCACTTCGTTCATTGAACGTTGGTTCAACCACCCCTCCGGGGGTGGTTTTTTGTTGCTTGGCCGCTTTGTATGGCTAGTCCTCTTTGCTTTTAAGCCGTCGTGAGCCG	381
751419	WesternChannelOMM_READ_00751419	0	0	0	1.25	0	0	0.25	0	0	0	1.25	0	0.75	3.5	5	Yes	0.58	4.16687	Synechococcus sp. CC9311	94	708	petF	Ferredoxin	Energy Metabolism	Environmental	TTGATTGGGGCTTTGGACGGAAAACCCTGATGAATCCCGTATCAAGGCGTCTGTCCGATGTAGAAGGGTTCGGTCCAGCAGGTTCAGATCGATTCGATCTCTGCGCATTACATCCATCCATGGCTTCTTATAAAGGGTCACCCTGGTCAGCGAGAGCGAAGGCCTCAACAAGACCATCGAAGTTCCTGACGATCAGTACATCCTCGATGCTGCTGAGGAGCAAGGCATCGATCTTCCCTATTCCTGCCGTGCAGGCGCTTGCTCCACGTGTGCAGGCAAAATCACTGCCGGCACCGTTGATCAGTCCGACCAGAGCTTCCTTGACGACGACCAG	334
603379	CAM_READ_0164603379	1.33	2.17	7.5	3.33	1.33	0	0.17	0	0.33	0	0	0	0.67	16.83	0	0	NA	NA	Synechococcus sp. CC9902	87	587	phoH	Phosphate starvation-inducible protein	Unclassified	Environmental	TGGGCGACCGCGGTCGTTTCGTCCTCGACCTTCCTGATCCTGAAGCTGCCCTCGCCATCGCTGGGGAAGCTGAAGTGACGTTGCACCGACTCGAGGCCCTCACAGGGGCTTCAGTCGTTTTGCGCGGGCTTCAACTGGTGATTTCCGGTCGAGCTGCTCAGATTGAGAGAGCTGCATCTGTTGTCGAGTTGGTTCGCCCTATTTGGCAAGACGGTCAAGCGGTTTCCTCCGTAGATCTTCAATCGGCGCTTGGGGCACTGAACACAGGTCGCGGCGACGACCACTCCGCCATGGCAGAGCAAGTTTTGGTGCGAAGTCCGCAGGGCAACACCTTGAGACCGCGCACCCTGCGACAAAAGAGTTATGTGGATGCGATGGAGCGTCACGACCTCACGTTCG…	482
820009	CAM_READ_0164820009	0.67	0	0.83	1.17	0.17	0.17	0	0	1.67	0	0	2	0	6.68	0	0	NA	NA	Synechococcus sp. CC9902	85	477	phoH	Phosphate starvation-inducible protein	Unclassified	Environmental	GTTGTTTTGCGCGGGCTTCAACTGGTGATTTCCGGTCGGGCTGCTCAGATTGAGCGAGCTGCGTCTGTTGTCGAGCTGGTTCGCCCCATTTGGCAAGACGGTCAAGCGGTGTCCTCTGTTGATCTGCAATCGGCTCTTGGGGCACTGAACACCGGTCGAGGCGACGACCACTCCGCCATGGCCGAGCAAGTTTTGGTGCGAAGTCCGCAGGGCAACACCTTGAGACCGCGCACCCTGCGACAGAAGAGTTATGTAGATGCGATGGAGCGCCACGATCTCACGTTCGCTCTAGGGCCGGCAGGAACAGGAAAACATTTTTGGCCACCGTTTTGGCGGTGCGCATGCTGACTGAACGCAAGGTTGATCGTTTGATCTTGACCCGACCGGCGGTGGAAGCAG…	433
11166	BL107_11166	0	1.25	1	0	0	0	0.25	0	0	0	0	0.75	0	3.25	7	Yes	0.781013	2.53655	Synechococcus sp. BL107	100	1674	phoH	Phosphate starvation-inducible protein	Unclassified	Genomic	GTGTTGCGGGGACTTCAATTGGTGATCACTGGTCGAGCCGCTCAGATTGAGCGAGCCGCTTCGGTTGTCGAGTTGGTTCGACCCATTTGGCAAGACGGTCAAGCGGTGTCGTCCGTTGATCTTCAGTCGGCTTTGGGGGCTCTGAATACAGGTCGCGGAGACGACCACTCGGCGATGGCAGAGCAAGTGTTGGTGCGAAGTCCGCAGGGCCAAACCTTGAGGCCACGAACCCTGCGACAGAAAAGTTACGTAGACGCCATGGAGCGCCACGACCTCACCTTTGCCCTGGGACCTGCCGGAACAGGGAAAACATTCTTGGCCGCCGTATTGGCGGTTCGCATGCTGACCGAACGCAAGGTTGAGCGACTGATCTTGACGCGACCGGCGGTGGAAGCTGGG…	906
477505	CAM_READ_0164477505	1.67	0	0	0	0	0	0	0	0	1	0	0	1	3.67	0	0	NA	NA	Synechococcus sp. CC9902	85	560	phrB	putative DNA photolyase	Replication and Repair	Environmental	CCCTACAGCCGTGAACGGGATCGGCAGGTGGCGAAGCGGTTGCAGGCTGATGGTCGAAAGGTGTTTGTGGATTGGGATCAGTTGTTGATCGCCCCGGAGTTACTCAAAACAGGAGCCGGCGCCCCCTATCGGGTGTATGGCCCATTCCTGCGCAATTGGCGGGGCAAGGTTGAGGCCCAACAGCCCATCACGATTGAGCCTCCATCGGGCCTTGTCGATCTGGAAGCAGACTTGGTACCGGATGGGGATCCCCTGGCTGCGATCCGTCATACCCATGGATTTGAAGGCACAGAGATCTGCCCATGTAGGCCTGGTGAATCTGCAGCCATGGAGCAACTCAGCTGTTTTGCTGATGGGGCACTTTCTGGCTACGAGCCAGATCGGAATTTCCCTAGCGTT…	498
599325	CAM_READ_0164599325	0	1	2	0	0	0	0	0	1	0.33	0	0	0	4.33	0	0	NA	NA	Synechococcus sp. CC9902	90	605	pmm1148	possible EF-1 guanine nucleotide exchange domain	Unclassified	Environmental	TCGTGTTTTGTATGGGTCTCACCGCAATCGAATGTCCAGATGGCATTTGCCACAGCCACCATGGCGGTCATGCGGTGGAACGTGAAACGATGAAATCCACCCTGCAGGACCACGGCAGGGACTGGTGCGAACGCCTGGCTGAGCGGATTTATGAGATGTCGGTCGACACGTTCTCCCAGAGCGTGATGCCCAGCTTGCATGCATCGGGCTGGCAGCGTCGCCATCTGGACTTGGAGTTCAAACTCGCCGAGAACGACTCCGAACTCGATCAAACCCTGGTGGACGGCATCTTTAATGCCACCGAGAGCTTTCTGCGTAGCAGTGAAGTGCATCGCTTGTTCATCCAAGAGCTTGTACAGGGCACGTTTGCCGAGGCAAGTGAAGACGAACTCCGCGTCC…	462
7321	S9902_07321	0.6	0.6	1	0	0	0	0	0	0.8	1	0	0	0	4	1	Yes	0.209412	6.16538	Synechococcus sp. CC9902	100	1166	pmm1148	possible EF-1 guanine nucleotide exchange domain	Unclassified	Genomic	GTGTTTTGTATGGGTCTCAGCGCAATCGAATGTCCAGATGGCGTTTGCCACAGCCACCACGGTGGCCACTCAGTAGAACGCGAAACGATGAAATCGACCCTGCAGGAGCACGGCAGGGACTGGTGCGAACGCTTGGCTGAGCGGATTTATGAGATGTCGGTCGACACGTTCTCTCAAAGCGTGATGCCCAGCCTGCATGCATCGGGCTGGCAACGGCGCCATCTGGACTGGGAGTTCAAACTTGCCGAAAACGATTCCGAGCCCGATCAGACCTTGGTCGACGGCATCATCAATGCCACCGAAAGCTTCCTGCGCAGCAGTGAAGTGCACCGCTTGTTCATCCAAGAGCTGGTGCAGGGCACGTTTGCTGAGGCGAGTGAAGACGAGCTTCGTGTTCAA…	588
20991	S9902_20991	0	0.67	0	0	0	0	0.33	0	0.33	0.33	3	0	0	4.66	5	Yes	0.644848	3.35205	Synechococcus sp. CC9902	100	5923	ppc	Phosphoenolpyruvate carboxylase	Carbohydrate Metabolism	Genomic	ATGCCTGAGTCCACCGCCCATGCACTCCAAGGCGAACAGCCCAGGGAGAGCGGTGTGACTGCTGGAGCCGGCCGATTGCTGCAGAACCGCTTGGTGTTGGTCGAAGACCTTTGGCAAACGGTTCTCCGCAGCGAGTGTCCCCCAGAACAAAGTGCTCGCCTCCTCCGACTAAAACAACTGAGTGATCCCGTGGCCCTTGAGGGGCGAGACGGTGACAGCACAAGCGAGGCGATTGTTGAATTGATCCGTGCCATGGATCTTTCAGAAGCCATTGCCGCGGCCAGAGCGTTCTCGCTGTATTTCCAACTCATCAACATCCTCGAACAACGCATCGAGGAAGACAGTTATCTCGACAGCCTGGCCCCCCGGAAATCAGCAGCAGACGACGGCCGCGACGCC…	2988
770599	CAM_READ_0163770599	1	1	0	1	0	0	0	0	0	1	0	0	0	4	4	Yes	0.584483	3.77339	Synechococcus sp. CC9902	91	677	ppc	Phosphoenolpyruvate carboxylase	Carbohydrate Metabolism	Environmental	ATGAGCTCACGCGTTTTCTCGAGTTGCCACAGCCCTACGGCGAGATGGAGGAGTCCACACGTATGGCCTGGTTGCTGGAAGAGCTCCGTACCCGGCGTCCATTGATTCCTACGGCAGTTCGCTGGTCAGACACCACCGCGGAGACCATGGCCCGTGTTCCGCATGTTGCATCGACTCCAGGAAGAGTTCGGGCCAGCGAATCTGCCATTCCTATGTGATATCGATGAGCCATACGGCCTCCGATCTATTGGAGGTGTTGCTGCTCGCGAAGGAAGCGGGATTAGTGGATCCAGCCGCCCGCAAAGCGTCGCTGCTAGTGGTGCCACTGTTCGAAACGGTGGAGGATTTACAACGCGCTCCAGCCGTGATGGACGAACTTTTTAACACCCCCCTCTATCG…	498
702281	CAM_READ_0164702281	0.5	0.25	0	0	0	0.25	0	0	0.5	0.5	0	0	1	3	6	Yes	0.833516	1.88915	Synechococcus sp. CC9902	90	616	ppc	Phosphoenolpyruvate carboxylase	Carbohydrate Metabolism	Environmental	CACCAGCGCTGGCCTTTTTTCCGAACCCTGATTTCCAAGGCGGAGATGACCCTCTCCAAAGTGGATCTCGACTTGGCTCATCACTACATGAACAGCCTTGGGAAACCAGAGCAACGTGAGGCCTTTGAGGCGATTTTTGCCGTGATTGCAACGGAATACGCCTTGACGCGGAAACTGGTTTTGGAGATCACCGGGCAACCCCGTCTACTCGGGGCTGATCAAGGACTGCAGCTCTCCGTAGACCTACGGAATCGCACCATCGTGCCTCTGGGATTTCTCCAGGTTGCGCTGCTGAAACGGTTGCGGGATCAAAACCGTCAGCCCCCGATGAGTGAAAGTCCTGGGGCACCAGAAGACACCCGGACCTACAGCCGCAGCGAACTACTCCGCGGAGCTCTG…	454
102755	CAM_READ_0162102755	1.33	1.67	0.67	0	0	0	0.33	0	1	3.33	0	1	1.33	10.66	7	Yes	0.805814	2.18883	Synechococcus sp. BL107	93	660	prsA	ribose-phosphate pyrophosphokinase	Carbohydrate Metabolism	Environmental	TGACGGCCTCGGATTGTAAAGCGGTTTGCTGATGGAGAGCTCTACGTCCAGATCCAAGAGTCGATCCGTGGCTGTGATGTCTTTCTGATCCAGCCCACCTGTGCTCCGGTGAACGATCACTTGATGGAGCTGTTGATCATGGTGGATGCGTGTCGACGCGCCTCTGCCCGACAAATCACAGCGGTAGTTCCTTACTACGGCTATGCGAGGGCTGATCGCAAAACAGCTGGTCGCGAGTCGATCACCGCCAAGCTCACCGCAAACCTGTTGGTGACCTCCGGAGTCGATCGCGTGCTGGCGATGGATCTCCATTCGGCTCAAATCCAGGGTTATTTCGATATTCCGTGTGATCACATTTATGGATCACCCGTTCTGGTGGATTATTTATCAACCCAAAAT…	451
14901	S9902_14901	1.5	1	0	0	1	0	0	0	0	0	0	0	0.5	4	8	Yes	0.822366	1.86135	Synechococcus sp. CC9902	100	1974	prsA	ribose-phosphate pyrophosphokinase	Carbohydrate Metabolism	Genomic	GTGACCAGCTTCCTGACAGCACCGCGGGCCGAGCAAGAGAAGCTTTCTGGTGAAAGTCCAAGGCTTCGACTTTTTAGCGGTACCTCTAACCCTGGCTTGGCTCGGGAGATTGCCGCATACCTGGGAGTTCCTGACGGCCCTCGGATTGTGAAGCGGTTTGCCGATGGGGAGCTCTACGTTCAAATCCAAGAGTCGATCCGCGGCTGTGATGTCTTTCTGATCCAGCCCACCTGTGCTCCGGTGAATGATCACTTAATGGAGCTGCTGATCATGGTGGATGCGTGTCGACGCGCATCCGCTCGACAAATCACAGCAGTGGTTCCTTACTACGGCTATGCGAGGGCTGATCGCAAAACAGCGGGTCGTGAGTCGATCACCGCCAAGCTCACCGCAAACCTG…	996
21601	S9902_21601	9.5	4	7.5	3.5	4	1.83	1.5	3.83	4	6.5	4.67	1.67	2.83	55.33	11	Yes	0.489167	4.71747	Synechococcus sp. CC9902	100	4567	psaA	photosystem I P700 chlorophyll a apoprotein A1	Energy Metabolism	Genomic	ATGACCATCAGCCCACCTGAACGTGGGAGTGACGCGAAGAGCCAGGTCGAAAAGGTTGACAATCCTGCAACCTTTGAATTGTTCGGCAAGCCCGGACATTTCGACCGAGCCCTCGCAAAGGGTCCCAAAACCACAACCTGGGTTTGGAACCTTCACGCCAACGCTCACGATTTCGACGCTCATACGAGTGACCTTCAAGAGGTCTCTCGGCGAATCTTCTCAGCTCATTTCGGCCATTTGGCCGTCATTTTCATCTGGCTGAGCGGCGCCTTCTTCCACGGCGCTCGCTTCTCCAACTATTCCGGTTGGCTAGCTGATCCCACCCACGTGAAGCCAAGTGCTCAGGTGGTGTGGCCGATCTTTGGCCAGGAAATCCTGAACGGTGACATGGGTGCCGGA…	2304
411869	JCVI_READ_1093015411869	3	2	1	2	1	3	0	2	2	3	4	3	1	27	10	Yes	0.540667	4.30656	Synechococcus sp. WH8020	93	1126	psaA	photosystem I P700 chlorophyll a apoprotein A1	Energy Metabolism	Environmental	CGATTGCCGTTGGTGGCAAGGTTGCTGCAGCAGCGATTCTCTGGGACCGCTGACTTCATGGTGCACACATCCACGCATCACGATTCACGTGACTGTGTTGATCATCTCAAAGGTGTGCTCTATGCCCGTAGCTCCCGCCTCGTTCCAGATAAAGCAAACCTGGGCTTCCGCTTCCCTTGCGACGGACCTGGCCGAGGTGGCACTGTCAGGTGTCTGCTTGGGACCATGTGTTCCTAGGCCTGTTCTGGATGTACAACTCCCTCTCCATCGTGATTTTCCACTTCAGCTGGAAGATGCAAAGCGATGTTTGGGGAACCGTGAATGCTGATGGCAGTGTCCAACACATCACGAATGGCAATTTCGCCAACAGTGCAATCACCATCAATGGCTGGCTGCGTG…	739
3911	S9311_03911	1.67	0.67	1	1	0.67	1	0.33	0.33	1.33	0.67	1.67	0	0.33	10.67	10	Yes	0.487568	4.69111	Synechococcus sp. CC9311	100	4567	psaA	photosystem I P700 chlorophyll a apoprotein A1	Energy Metabolism	Genomic	ATGACCATTAGCCCACCAGAGCGTGGGAGCACCGCGAAGAGCCAAGTCGAAAAGGTTGACAATCCAGCAACCTTTGAATTGTTCGGCAAGCCCGGACATTTCGACCGAGCTCTCGCGAAAGGCCCCAAGACCACAACCTGGGTCTGGAACCTCCACGCCAACGCTCACGATTTCGATAGTCACACGAGTGACCTTGAAGAGGTTTCTCGGAAGATCTTTAGTGCTCACTTCGGCCATTTGGCCGTGATCTTCATCTGGCTAAGCGGCGCCTTCTTCCACGGAGCCCGCTTCTCCAACTTCTCCGGCTGGCTCGCCGATCCCACCCACGTGAAGCCAAGTGCTCAGGTGGTGTGGCCCGTGTTTGGCCAGGAGATTCTCAATGGCGACATGGGTGCCGGA…	2304
840302	JCVI_READ_1092963840302	0.5	0	1.5	0.5	0	0.5	0	0	0.5	0.5	0	0	0	4	1	Yes	0.569792	4.12192	Synechococcus sp. CC9311	90	1650	psaA	photosystem I P700 chlorophyll a apoprotein A1	Energy Metabolism	Environmental	CCCCGGGGTGGAAATCTGACTTTTAAGGTGGAATTAATCCAGTTACTGGAAGCATGTGGATGAGCGATATCGCTCATCACCACCTAGCCATCGCGGTGTTGTTCATCGTGGCTGGTCACATGTACCGCACGAACTGGGGCATCGGGCACTCCATCAAGGAGATCCTCGAAGGTCAGAAGGGTGATCCCCTTCTATTCCCTGCAACCAATGGGCACGACGGACTCTTTGAGTTCATGACGACCTCTTGGCATGCTCAGTTGGGAGTCAATCTGGCCATGCTCGGTTCGCTGAGCATCATCGTGGCCCAGCACATGTATGCGATGCCTCCGTATCCGTACATGGCGATTGACTATCCGACGCAGATCGGACTGTTCACCCACCACATGTGGATCGGTGGCT…	1160
21591	S9902_21591	4.83	7.33	5.17	1	1.83	2.5	1.17	1.5	3.83	6.17	4.83	4.17	3.83	48.16	5	Yes	0.671233	3.08236	Synechococcus sp. CC9902	100	4377	psaB	photosystem I P700 chlorophyll a apoprotein A10	Energy Metabolism	Genomic	ATGGCAACGAAATTTCCTTCGTTCAGCCAGGGTCTGGCCCAGGACCCGACAACCCGCCGTATTTGGTACGGGATCGCCACGGCTCACGACTTCGAGAGCCATGACGGAATGACGGAGGAGCGGCTTTATCAAAAGCTCTTCTCCACACATTTCGGCCATCTCGCGATCATCGGCCTGTGGGTTTCGGGAAACCTGTTCCACATCGCCTGGCAGGGCAACTTCGAGCAGTGGGTCGCCGACCCTCTGCACGTGCGCCCCATCGCTCACGCAATTTGGGATCCCCACTTTGGTCAAGGCGCCATTGACGCCTTTACCCAAGCTGGTGCTTCCTCCCCAGTGAACATTGCCTACTCAGGCCTTTATCACTGGTTTTACACAATCGGCATGACCACGAATGCC…	2208
12869	CAM_READ_0162012869	4	1	0.67	0	0	3	0.67	1	0.67	1	1	0	0	13.01	3	Yes	0.671806	3.11268	Synechococcus sp. WH8020	92	686	psaB	photosystem I P700 chlorophyll a apoprotein A10	Energy Metabolism	Environmental	AAGTTGATGCCTGACAGAAGGACTTCGGTTACTCTTCCCCTCGCGACGGCCCTGGCCGTGGCGGTACCTGTGACATCTCTGCCTGGGACTCTTTCTATCTAGCTGTCTTCTGGGCTCTGAACACAGTGGGTTGGGTCACCTTCTACTGGCACTGGAAGCACCTTGCGATTTGGCAGGGCAACGTGGCTCAGTTCAACGAATCCAGCACCTATCTGATGGGCTGGTTCCGCGACTACCTCTGGCTGAACAGGTTCACAGCTGATCAATGGCTACAACCCATTTGGCAGCAACAACCTGGCTGTTTGGTCTTGGATGTTCTTGTTCGGTCACTTGGTTTGGGCGACAGGATTCATGTTCCTGATCTCCTGGCGTGGTTATTGGCAGGAGTTGATTGAGACC…	452
335005	CAM_READ_0165335005	2.2	0	0	0	0	2	1.6	1	0	2.6	0	2	0	11.4	12	Yes	0.572553	4.14941	Synechococcus sp. CC9902	96	538	psaB	photosystem I P700 chlorophyll a apoprotein A10	Energy Metabolism	Environmental	CCTTTGGCAGTAACAATTTGGCCGTTTGGTCTTGGATGTTCCTGTTCGGTCACCTGGTATGGGCGACAGGTTTCATGTTCCTTATTTCCTGGAGAGGTTATTGGCAGGAACTTATTGAGACCATCGTTTGGGCTCATCAGCGCAGCCCTATCGCCAACATGATGGGTTGGCGTGATAAGCCAGTGGCTCTCTCGATTGTCCAGGCTAGGGTTGTGGGTCTCGCTCACTTCTCGGTTGGTTACGTACTCACCTACGCGGCCTTCCTCATAGCCTCGACCTCAGGCAAGTTCGGTTGATCAATATCAATTCAACGGTCTGATTCGCGAGTCATTC	333
686715	CAM_READ_0217686715	0.5	2.5	3.5	0.5	0.5	0	0.5	0	0.5	1	0	0	0	9.5	1	Yes	0.312609	5.61901	Synechococcus sp. CC9605	99	677	psaB	photosystem I P700 chlorophyll a apoprotein A10	Energy Metabolism	Environmental	TACCGGGTACCGGTACCTACCGGTTCGTACCGTACGGTCGACGTACTCCCGAAGCCCGCGGTCAGCACGTTGGTTGGGACAACTTCCTCAACGTTCTGCCTCACCCCGCCGGTCTTGGACCCTTCTTCACCGGCAACTGGGGTGTGTACGCCGAAAACCCCGATTCTCTGAATCAGGTCTTCGGTAGTTCCGAAGGTGCCGGCACCGCCATCCTCACCTTCCTCGGTGGCTTCCACCCTCAGACAGAAGCCCTCTGGCTGACGGACATCGCCCACCACCACCTGGCCATCGGTTGCCTCTTCGTGATCGCCGGCCACATGTACCGGACCAACTTCGGTATCGGTCACTCCATCAAGGAGATCC	363
368689	CAM_READ_0167368689	1	0	0.33	0	0	0.33	0.33	0.33	0	0.67	0.67	2	1.33	6.99	12	Yes	0.34129	5.27222	Synechococcus sp. CC9311	93	491	psaB	photosystem I P700 chlorophyll a apoprotein A10	Energy Metabolism	Environmental	ATCAGACACGGGACTCCACACCACCACCCTGATCCTTGTGAAGGGTGCTCTGGATGCACGTGGATCCAAGTTGATGCCTGACAAGAAGGACTTCGGTTACTCCTTCCCCTGCGACGGCCCTGGTCGTGGCGGTACTTGTGACATCTCTGCCTGGGACGCTTTCTATCTAGCTGTCTTCTGGGCTCTGAATACAGTCGGTTGGGTCACCTTCTACTGGCACTGGAAGCACCTTGCGATTTGGCAGGGCAATGTGGCTCAGTTCAATGAGTCCAGCACCTATCTCATGGGCTGGTTCCGCGACTACCTCTGGCTGAACAGTTCACAGCTGATCAATGGTACAACCACTTAGTCGACNCAACAACCTACGGTCGTGTTTGGTTCGTTCGGTAGTG	392
3921	S9311_03921	1	0.75	2.5	0	0	0.75	0.25	0.25	0.25	0.5	0.25	0	0	6.5	3	Yes	0.83087	1.86391	Synechococcus sp. CC9311	100	4395	psaB	photosystem I P700 chlorophyll a apoprotein A10	Energy Metabolism	Genomic	ATGGCAACGAAATTTCCTTCGTTTAGCCAGGGTCTGGCACAGGACCCGACAACCCGCCGCATTTGGTACGGGATCGCCACGGCTCACGACTTCGAGAGCCATGACGGAATGACGGAGGAGAAGCTTTACCAAAAGCTCTTCTCCACCCATTTCGGGCATCTCGCGATCATCGGCCTTTGGGTTTCGGGAAACCTGTTCCATATCGCCTGGCAGGGCAACTTCGAACAGTGGGTCTCCGACCCACTGCACGTCCGCCCAATCGCTCATGCAATTTGGGATCCCCACTTTGGTCAAGGCGCAATTGATGCCTTCACTCAAGCGGGTGCATCCTCCCCAGTGAATATTGCCTATTCAGGCCTTTATCACTGGTTTTACACCATCGGCATGACCACGAATGCC…	2217
299979	CAM_READ_0162299979	0.6	2	1	0	0	0	0	0	1	0	0.6	0	0	5.2	2	Yes	0.568545	3.91161	Synechococcus sp. CC9311	93	504	psaB	photosystem I P700 chlorophyll a apoprotein A10	Energy Metabolism	Environmental	ACGCTCGACAGCGATTACGACCCCGAAGCCAATAAGGACAACGTCCTGGCTCGGATGCTCGAGCACAAAGAAGCCATCATTAGTCACCTGAGCTGGGTCTCACTTTTTCTGGGCTTTCACACTCTCGGCCTGTACGTCCATAACGACGTGGTGGTTGCGTTTGGAACCCCTGAGAAGCAGATCTTGGTTGAGCCTGTCTTTGCACAGTTCGTCCAGGCTGCTTCCGGTAAAGCGATTTACGGCTTTGATGTTCTCCTAGCGAATGCTGGTGGTGCTGCTGCCAATGCCAACGCTGCCTACATGGGCGGTTGGATGGATGCCATCAACGGTGTTCGTGGCAGCAACGACTTG	351
10141	S9902_10141	5.17	4.67	1.67	0.67	0.67	0.83	2.5	2.17	2.33	1.17	0.83	1.5	5.33	29.51	9	Yes	0.00333333	7.82917	Synechococcus sp. CC9902	100	2135	psbA	photosystem II PsbA protein (D1)	Energy Metabolism	Genomic	ATGTCCACCGCAATTCGCAGCGGACGCCAGAGCAACTGGGGATCCTTTTGTGATTGGGTCACCAACACCAACAACCGCATTTATGTGGGTTGGTTTGGAGTCTTGATGATTCCTTGCCTGCTGGCTGCCACCATTTGCTTCATCATCGCGTTTGTTGCCGCTCCTCCGGTTGACATCGATGGCATTCGCGAGCCTGTCGCTGGCTCCTTGATCTACGGCAACAACATCATTTCTGGTGCTGTTGTTCCTTCCAGCAACGCCATCGGCTTGCACTTCTATCCCATCTGGGAAGCAGCTTCACTCGACGAGTGGCTGTACAACGGCGGTCCTTTCCAGCTCGTCGTCTTCCACTTCCTCATCGGCATTTCCGCCTACATGGGTCGTCAGTGGGAACTCTCT…	1077
19261	S9311_19261	3.5	5.83	1.33	0.67	0	0.33	2.83	1.5	0.67	1.5	0.67	0	3.17	22	2	Yes	0.15375	6.78619	Synechococcus sp. CC9311	100	2135	psbA	photosystem II PsbA protein (D1)	Energy Metabolism	Genomic	ATGGCTACTGCCGTTCGCAGCGGTCGCTTAAGCAGCTGGCAAAGCTTTTGTCAGTGGGTCACAGATACCAACAACCGTATTTATATCGGTTGGTTTGGTGTGCTGATGATTCCTTGTCTGCTTGCCGCTACCACCTGCTTCATCGTCGCTTTCATCGCCGCACCTCCGGTTGATATCGACGGCATCCGCGAGCCTGTCGCTGGCTCACTGCTTTATGGCAACAACATCATTTCTGGTGCTGTTGTTCCTTCCAGCAACGCCATTGGCTTGCACTTCTACCCAATTTGGGATGCTGCCTCACTCGATGAGTGGCTCTACAACGGCGGCACCTATCAGCTGGTTGTTTTCCACTTCCTGATTGGTATTTCGGCCTATATGGGCCGTCAGTGGGAACTTTCC…	1077
494741	JCVI_READ_1091143494741	0.67	1	0	0	0	0.83	0	0	0	0	0	1	9	12.5	6	Yes	0.506512	4.45203	Synechococcus sp. CC9902	98	4250	psbA	photosystem II PsbA protein (D1)	Energy Metabolism	Environmental	GAAGGCTTTGAGGTTCGTTCTCTGATGCATGCCCCTGGGCATCTCTGGAACCTTCAACTACATGTTGGTGTTCCACGGTTGAGCACAACATCCTGATGCACCCCTTCCACATGCTGGGTGTTGCAGGCGTCTTCGGCGGCAGCTTGTTCTCCGCCATGCACGGCTCACTGGTGACCTCCTCCTTGGTGCGTGAAACCACCGAAAGCGAGTCCCAGAACTACGGCTACAAATTCGGCCAAGAAGAAGAGACGTACAACATCGTGGCTGCTCACGGCTACTTCGGTCGCCTGATCTTCCAATACGCCTCCTTCAACAACAGCCGTAGCCTCCACTTTTTCCTGGGTGCATGGCCTGTTGTCGGCATCTGGTTTACGTCCATGGGCATTTCAACCATGGCCT…	663
845671	CAM_READ_0164845671	4.33	1.33	1.83	0	4.67	0	1.67	1.17	1	2.5	3.83	0.33	0	22.66	0	0	NA	NA	Synechococcus sp. CC9902	89	646	psbB	photosystem II PsbB protein (CP47)	Energy Metabolism	Environmental	ATCGTTGCGCACCACATTGCGGCTGGAATTGTTGGCATTATCGCCGGCATTTTCCACATCACCACGCGACCGCCTGAGCGACTTTATAAAGCTCTCCGCATGGGCAACATCGAAACAGTCTTAGCGAGTGCCATCGCAGCTGTTTTATTTGCTGCATTCATTGTGGCTGGAACTATGTGGTACGGCTCAGCCGCCACCCCAGTCGAGTTGTTCGGTCCCACTCGTTATCAGTGGGATCAGAGCTACTTCAAGACGGAAATCAACCGTCGCGTTCAAACGGCCATGGACGATGGCGCGACTCGTGAAGAAGCCTTTGCGTCTATCCCAGAGAAGCTGGCTTTCTACGACTACGTCGGGAATAGCCCGGCCAAGGGTGGATTATTCCGAGTTGGCCCAATG…	493
845845	CAM_READ_0164845845	2.5	0.5	2.83	1.17	0.67	2.17	1.33	0.67	0	3.33	1.17	0.67	1.33	18.34	0	0	NA	NA	Synechococcus sp. CC9902	87	499	psbB	photosystem II PsbB protein (CP47)	Energy Metabolism	Environmental	CAGAGGGATTCAACTTCCCCTTTAACCCCGGTGGCATCGTTGCGCACCACATTGCAGCTGGAATTGTTGGCATTATTGCCGGCATTTTCCACATCACCACGCGACCGCCTGAGCGGCTTTATAAAGCTCTCCGCATGGGCAACATCGAAACAGTCTTAGCGAGTGCCATCGCAGCTGTTTTCTTTGCTGCATTCATTGTCGCTGGAACGATGTGGTACGGCTCAGCCGCCACCCCAGTTGAGTTGTTCGGTCCCACCCGTTATCAGTGGGATCAGAGCTATTTCAAGACGGAAATCAACCGTCGGGTTCAAACGGCCATGGACGATGGCGCGACTCGTGAAGAAGCCTTTGCATCTATTCCAGAGAAGCTGGCTTTTTATGACTACGTCGGCAACAGTC…	412
327941	CAM_READ_0161327941	3.4	2	1.8	0.4	1.4	0	2.6	2.4	0.4	1.6	0.2	0.4	0.8	17.4	0	0	NA	NA	Synechococcus sp. CC9902	87	434	psbB	photosystem II PsbB protein (CP47)	Energy Metabolism	Environmental	TCTGGCACTGGACCTACTGGGATCTTGAGATCTGGCAGGACCCCCAGAACCCGGAGTAACCCAGCCCTTTGATTTACCTAAGATTTTCGGCATTCACCTGCTCTTAGCTGGCCTTGGCTGCTTCGGATTTGGTGCTTTCCATCTCACAGGTGTCTTCGGACCAGGCATGTGGATCTCTGATCCTTATTCCATCACCGGCCACCTCGAGGCGGTTCAACCATCATGGGGGCCAGAGGGATTCAATCCCTTTAACCCCGGTGGCATCGTTGCGCACCACATTGCAGCTGGAATTGTTGGCATTATTGCCGGCATTTTCCACATCACCACGCGACCGCCCGAGCGGCTTTATAAAGCTCTCCGCATGGGCAGAGTGCGTCT	378
855269	CAM_READ_0109855269	0	1	0	1	0	0	0	0	0	1	0	0	0	3	0	0	NA	NA	Synechococcus sp. CC9311	89	531	psbB	photosystem II PsbB protein (CP47)	Energy Metabolism	Environmental	AAACATCGAGACTGTGCTTGCTAGCGCGATCGCAGCTGTTTTCTTCGCTGCTTTCATTGTGGCTGGAACCATGTGGTATGGCGCAGCTGCAACCCCTGTTGAGTTGTTCGGACCCACTCGCTATCAGTGGGATCAGAGCTACTTCAAAACTGAAATCAATCGCCGCGTTCAGACGGCCCTTGACGAAGGGGCAACCGTCGATGAGGCCTACGCTGCTATTCCTGAAAAACTCGCCTTCTACGACTACGTGGGTAATAGTCCTGCCAAGGGCGGCCTATTCCGCGTTGGTCCGATGGTGAATGGAGATGGTCTTGCAACTGGATGGATTGGTCACCCTGTCTTCACCGACAAAGAGGACGTGAACTTCAAGTGCGTCGTCTTCCCAACTTCTTCGAGAAC…	413
20281	S9902_20281	1.5	1.17	2.17	0.67	1.5	1	0.17	0.67	0.5	2	2	0.83	2.83	17.01	5	Yes	0.34625	5.21981	Synechococcus sp. CC9902	100	3092	psbB	photosystem II PsbB protein (CP47)	Energy Metabolism	Genomic	ATGGGATTGCCCTGGTATCGGGTGCACACCGTCGTCATCAATGACCCGGGTCGCCTTTTGGCGGTGCACCTCATGCATACAGCCCTCGTTGCCGGCTGGGCCGGCTCCATGGCTCTGTACGAATTAGCGATTTTCGATCCATCCGATGCTGTCCTGAACCCCATGTGGCGTCAGGGCATGTTTGTGATGCCCTTCATGTCTCGCCTGGGAGTTACCGGGAGCTGGGGTGGTTGGAGCATCACTGGTGAAACCGGGGTTGACCCTGGCTTCTGGAGCTTCGAAGGTGTTGCCGCCGCCCACATTATTTTTTCAGGCCTGCTGATGCTGGCCGCCATCTGGCACTGGACCTACTGGGATCTTGAGATCTGGCAGGACCCCAGAACCGGAGAACCAGCCCTT…	1560
139391	CAM_READ_0155139391	6.2	1.2	0	0.8	1.2	0.6	0.4	0.4	1	0.8	0	0.6	0	13.2	4	Yes	0.850521	1.6062	Synechococcus sp. CC9311	89	663	psbB	photosystem II PsbB protein (CP47)	Energy Metabolism	Environmental	CGGCCTATTGATGCTCGCTGCGATTTGGCACTGGACGTATTGGGATCTTGAAATTTGGCAAGATCCCGTACAGGCGAACCAGCTCTAGACCTTCCGAAAATTTTCGGCATCCACCTTCTCCTCGCAGGATTGGGTTGTTTTGGATTTGGTGCTTTTCACCTCACCGGTGTCTTCGGACCTGGCATGTGGATTTCTGATCCCTATGCATTAACAGGTCATCTCGAGGCAGTTCAACCGTCGTGGGGACCGGAAGGCTTCAACCCGTTCAATCCAGGCGGAATTGTTGCCCACCACATTGCCGCAGGCATCGTGGGAATTATTGCAGGTATTTTCCACATCACAACTCGACCGCCGGAGCGCCTTTATAAGGCTTTGCGTATGGGAAACATCGAGACTGTG…	507
841397	CAM_READ_0164841397	1	0.5	1	1	2.5	0	0	0	0	1	2	1.5	0.5	11	0	0	NA	NA	Synechococcus sp. CC9902	82	502	pyk	pyruvate kinase	Carbohydrate Metabolism	Environmental	TCCCCTCGCACCATTCCCAATGCCTTAAGCGGAGCAGTTAGCACCATTGCAAGCCAGCTAAACNCCGCTGCCATCATTCCCCTCACCAAAACTGGAGCTACGGCCCACAATGTGAGCAAATTCAGGCCAGCGGCGCCGATTCTCGCCGTCACCCCTGATCAATCCGTTGCTTGCAGATTGCAACTTGTTTGGGGGGTGACACCATTGGTAATCCCTGAAGAAAACGACACGACGGCCACGTTTATTTCGGCCATGCGAAAGGCCAAAGAGCTCAACCTCCTAAAAGAGGGTGATCTTGTGGTTCAAACAGCAGGAACCCATTCCGGGGTCTCGGGCTCCACGGATCTCGTGAAGGTTGGAATTGTGACCTCAACTGACGACTGCAGCTTTTTTTAGAAT…	503
63569	CAM_READ_0165063569	0.67	0	0.67	1	1.33	0	0	0	1.67	0	0.67	0	0	6.01	0	0	NA	NA	Synechococcus sp. CC9902	89	480	pyk	pyruvate kinase	Carbohydrate Metabolism	Environmental	GATTCCATGGCATCAAGTCCCCGCCCTACGCGGGCGGAGGTGAGCGATGTTGCGAACGCGATTCTGGATGGCACCGATGCCGTCATGCTCTCCAACGAAACCGCTGTTGGCGACTTCCCTGTGGAAGCAGTGCAGACCATGGCCACCATTGCGGGGAGAATCGAAAAGGATTACCCAGAGCGGTCGATTGACAGCAACCTCGCCTGCACAATTCCAAATGCCTTAAGCGGAGCGGTTAGCACCATTGCAAGCCAGCTCAACGCCGCTGCCATCATTCCCCTCNCCAAAACTGGAGCGACGGCCCACAACGTAAGCAAATTCAGGCCAGCGGCTCCGATTCTCGCCGTCACCCCTGATCAATCCGTAGCTTGC	372
888479	CAM_READ_0164888479	0	0.5	0.75	0	1	0.5	0	0.25	0.25	1.25	0.25	0.75	0.25	5.75	0	0	NA	NA	Synechococcus sp. CC9902	89	654	pyk	pyruvate kinase	Carbohydrate Metabolism	Environmental	TGACTTACGAGAAGTTGGCGGATGAAGTCACAGCCGGAAGCCGCATTCTTTTGGATGACGGACGGGTGGAGATGAAAGTCGAACGCGTCGATCAAGGGCAGCAAACGCTGCACTGCAGCGTCACGGTGGGGGGAGTTCTCTCCAACAACAAGGGAGTGAATTTCCCGGATGTTCAGTTGTCCGTTCGTGCTCTTACGCATAAAGACAAAGAAGATCTCGCCTTTGGCTTGAGCCAAGGGGTGGACTGGGTAGCCCTGAGCTTCGTCCGGAACCCATCCGACATGGAGGAAATACGTGGTCTCATTCGCCAACACGGCTACGAAACCCCGGTCGTTGCCAAGATCGAAAATTTGAAGCCATCGATCAGATCGATGCAATTTTGCCCCTGTGCGATGGCGT…	518
8835	CAM_READ_0163008835	0	0.4	0.4	0	0.6	0	0	0	0	1.4	0	1.2	0.8	4.8	0	0	NA	NA	Synechococcus sp. CC9902	88	610	pyk	pyruvate kinase	Carbohydrate Metabolism	Environmental	CCTCGCGAATGGCGATCCTTTTTCGCTGACCTCAAGGCCTGTGAGTTGCGGGCAGAGCATCGCAACAGTGACCTACGAGAAGTTGGCGGATGAAGTCACAGCCGGAAGCCGCATTCTTTTGGATGACGGACGGGTGGAGATGAAAGTCGAACGCGTCGATCAAGGGCAGCAAACGCTGCACTGCAGCGTCACGGTGGGGGAGTTCTCTCTAACAACAAGGGAGTCAATTTCCCGGATGTTCAGTTGTCCGTTCGTGCTCTTACGGATAAAGACAAAGAAGATCTCGCCTTTGGCTTGAGCCAAGGGGTGGACTGGGTAGCCCTGAGCTTCGTCCGGAACCCGTCCGACATGGAGGAAATACGTGGTCTCATTCGCCAACACGGGTACGAAACCCCGGTC…	494
117349	CAM_READ_0165117349	0	0	0	0.25	0.5	0	1	0	0	0	0	1	0.5	3.25	0	0	NA	NA	Synechococcus sp. CC9902	85	580	pyk	pyruvate kinase	Carbohydrate Metabolism	Environmental	AGAGCTAGGCCAAACCATCGGGATCCTCCAGGATCTCCAGGGTCCAAAGATCAGATTGGGGCGATTTGCCGATGGGCCCATCACCCTCGCGAATGGAGATCCTTTTTCGCTGACCTCAAGGCCTGTGAGTTGCGGGCAGAGCATCGCAACAGTGACTTACGAGAAGTTGGCCGATGAAGTCACAGCCGGAAGCCGCATTCTTTTGGATGATGGACGGGTGGAGATGAAAGTCGAACGCGTTGATCAAGGGCAGCAAACTTTGCACTGCAGCGTCACGGTGGGGGGGAGTTCTCTCCAACAACAAGGGAGTCAATTTCCCGGATGTTCAGTTGTCCGTTCGTGCCCTTACAGATAAAGACAAAAAAGATCTCGCCTTTGGCCTGAGCCAAGGGGTGGACT…	516
contig949	rbcL_synechococcus_Contig_949	1	0.5	1.5	1.67	2.17	1.67	0.83	0	0.67	2.17	1.67	3.67	2.83	20.35	2	0	0.329889	4.6914	Synechococcus sp. CC9902	93	1474	rbcL	ribulose-bisphosphate carboxylase large chain	Energy Metabolism	Environmental	ACCGGCACCTGGTCCACTGTGTGGTCCGAGCTCCTCACCGATCTCGACTTCTACAAAGGGCGTTGCTATCGCATCGAAGACGTTCCTGGTGACAAGGAAGCCTTYTATGCCTTCATCGCTTACCCCCTCGACTTGTTCGAAGAGGGTTCAATCACCAACGTTCTGACCTCTCTGGTCGGCAACGTGTTCGGATTCAAAGCTCTGCGCCACCTGCGTCTGGAAGACATTCGCTTCCCGATTGCGTTCATCAAGTGCTGCGCAGGCCCGCCAAACGGTATTGCCGTTGAGCGTGACCGGATGAACAAGTACGGCCGCCCTCTTCTGGGTTGCACCATCAARCCTAARCTCGGCCTGAGCGGTAAGAACTACGGCCGTGTTGTCTATGAGTGCCTTCGCGGC…	988
Contig953	rbcL_synechococcus_Contig_953	10.5	1.75	7.75	12.25	17.75	15.75	5	0	4.75	22.75	7.75	26.25	40.25	172.5	10	Yes	0.178889	6.65254	Synechococcus sp. CC9902	94	1384	rbcL	ribulose-bisphosphate carboxylase large chain	Energy Metabolism	Environmental	TGAGTCGCCGTCGCGGCGGTCGTGACTCACAGGACGATGAGAACATCAACTCTCAGCCGTTCCAGCGTTGGCAGAACCGCTTCGAATTCGTTGCGGAAGCCATCAAGATTGCCGAACAGGAAACCGGAGAGCGAAAGGGTCACTACCTCAACGTGACCGCGAACACTCCGGAAGAAATGTATGAGCGCGCTGAGTTCGCTAAGGAACTCAATCAGCCGATCATCATGCACGACTTCATCACCGGTGGCTTCACAGCCAACACCGGTTTGTCGAAGTGGTGCCGCAAGAACGGCATGTTGCTGCACATTCACCGTGCCATGCACGCTGTGATTGACCGTCATCCCAAGCACGGCATCCACTTCCGCGTTCTCGCCAAGTGTCTGCGTTTGTCAGGTGGTG…	902
Contig957	rbcL_synechococcus_Contig_957	2	0.67	5.17	7.67	9.83	6.67	0.17	0.17	5	11.67	8.67	7.17	3.83	68.69	10	Yes	0	8.43459	Synechococcus sp. CC9902	94	1229	rbcL	ribulose-bisphosphate carboxylase large chain	Energy Metabolism	Environmental	AAGGAGTACAGGGACACTTACTCGGACTCCTGACTTACGTCCCCCTAGACACCGACCTGCTGGCCTGCTTTAAATGCACAGGCCAAGAAGGTGTGCCCAAGGAAGAAGTTGCTGCTGCTGTGGCTGCTGAATCCTCAACCGGCACCTGGTCCACTGTGTGGTCAGAGCTCCTCACCGACCTCGACTTCTACAAGGGCCGTTGCTACCGCATCGAAGACGTTCCTGGTGACAAGGAAGCGTTCTACGCCTTTATCGCTTACCCCCTCGACTTGTTCGAAGAGGGTTCCATCACCAACGTTCTGACCTCACTGGTCGGCAACGTTTTTGGATTCAAAGCTTTGCGTCACCTGCGTCTGGAAGACATTCGCTTCCCGATTGCATTCATCAAGTGCTGCGCTG…	816
Contig951	rbcL_synechococcus_Contig_951	1.67	1.67	4.67	1	4.33	5	2	0.33	0.33	4.33	4.33	10.33	9	48.99	10	Yes	0.13	7.09741	Synechococcus sp. KORDI-49	99	1231	rbcL	ribulose-bisphosphate carboxylase large chain	Energy Metabolism	Environmental	ATGATCTTTTTGAGGAAGGGTCCATCACCAACGTTCTGACCTCACTGGTCGGCAACGTGTTCGGCTTCAAGGCCCTGCGCCACCTGCGTCTCGAAGACCTGCGCTTCCCGCTGGCCTTCATCAAGACCTGCTACGGCCCGCCGAACGGCATCCAGGTCGAGCGCGACCGGATGAACAAGTACGGCCGTCCTCTGCTGGGTTGCACCATCAAGCCGAAGCTCGGCCTGAGCGGTAAGAACTACGGCCGTGTCGTCTATGAGTGCCTTCGCGGCGGTCTGGACTTCACCAAGGACGACGAGAACATCAACTCCCAGCCGTTCCAGCGTTGGCAGAACCGCTTCGAATTCGTTGCGGAAGCCATCAAGCTGTCCGAGCAGGAGACCGGCGAGAAGAAGGGTC…	722
Contig928	rbcL_synechococcus_Contig_928	2.67	0.5	1	1	2.17	3.67	0.67	0.33	1	2.17	1.83	3.5	6.17	26.68	10	Yes	0.172	6.63086	Synechococcus sp. CC9902	99	2489	rbcL	ribulose-bisphosphate carboxylase large chain	Energy Metabolism	Environmental	ATGAGCAAGAAGTACGACGCTGGGGTCAAGGAGTACAGGGACACTTACTGGACTCCTGATTACGTTCCCCTAGACACCGACCTCCTGGCCTGCTTCAAGTGCACCGGCCAAGAAGGTGTTCCCAAGGAAGAAGTTGCCGCTGCTGTGGCTGCTGAATCCTCAACCGGCACCTGGTCCACTGTGTGGTCCGAGCTCCTCACCGACCTCGACTTCTACAAGGGCCGTTGCTACCGCATCGAAGACGTTCCTGGTGACAAGGAGGCGTTCTATGCCTTCATCGCTTACCCCCTCGACCTGTTCGAAGAGGGTTCCATCACCAACGTTCTGACCTCATTGGTCGGCAACGTGTTCGGCTTCAAAGCTTTGCGCCACCTGCGTCTGGAAGAYATTCGCTTCCCG…	1413
Contig936	rbcL_synechococcus_Contig_936	1	0	1.5	1	0.5	0.5	1.5	0	1	2	0.5	2	1	12.5	12	Yes	0.569	4.06601	Synechococcus sp. WH8102	96	1196	rbcL	ribulose-bisphosphate carboxylase large chain	Energy Metabolism	Environmental	TCACCGACCTAACGGAGTTTTCCCATGAGCAAGAAGTACGACGCTGGGGTCAAGGAGTACAGGGACACTTACTGGACTCCTGATTACGTTCCCCTCGACACCGACCTGCTGGCCTGTTTCAAGTGCACCGGCCAGGACGGTGTGCCCAAGGAAGAAGTTGCCGCTGCTGTGGCTGCTGAATCCTCCACCGGCACCTGGTCCACTGTGTGGTCCGAGCTCCTCACCGACCTCGACTTCTACAAAGGCCGCTGCTACCGCATCGAAGACGTCCCTGGTGACAAGGAGTCGTTCTATGCCTTCATCGCCTACCCCCTCGACCTGTTCGAAGAGGGTTCCATCACCAACGTTCTGACCTCCCTGGTCGGCAACGTGTTCGGTTTCAAGGCACTGCGTCACCTC…	747
Contig931	rbcL_synechococcus_Contig_931	1	0.33	1	1.33	0.33	1	0.33	0	0.33	1.67	1	1	1	10.32	10	Yes	0.178667	6.36992	Synechococcus sp. CC9311	100	2549	rbcL	ribulose-bisphosphate carboxylase large chain	Energy Metabolism	Environmental	ATGAGCAAGAAGTACGACGCTGGGGTCAAGGAGTACAGAGACACTTACTGGACTCCCGATTACGTTCCCCTCGACACCGACCTGCTGGCCTGCTTCAAGTGCACCGGCCAAGAAGGTGTTCCCAAAGAAGAAGTTGCAGCTGCTGTTGCCGCTGAATCTTCAACTGGTACCTGGTCCACTGTGTGGTCCGAGCTCCTCACCGACCTCGACTTCTACAAAGGCCGCTGCTATCGCATCGAAGACGTCCCTGGTGACAAGGAGTCGTTCTATGCCTTCATCGCTTACCCCCTCGACCTGTTCGAAGAGGGTTCAATCACTAACGTTCTGACCTCATTGGTCGGCAACGTGTTTGGTTTCAAAGCACTGCGTCATCTCCGTCTGGAAGACATTCGCTTCCCG…	1413
725693	CAM_READ_0164725693	1.5	0	2.33	0.83	0	0	0.83	0	0	0	0	0	0.33	5.82	4	0	0.790723	2.35775	Synechococcus sp. BL107	92	630	recA	recombinase A	Replication and Repair	Environmental	TCCATGCCTGCTGACATGAAGACCACCGCTCCTGGCTCCGATGCTCGTTCCTCCGGAGAGCGCGATAAGGCCCTGAATTTGGTGCTCGGCCAAATCGAGCGCAATTTCGGGAAAGGCTCAATCATGCGCCTTGGAGATGCCTCCCGCATGAGGGTGGAAACCATCTCGACTGGGGCGTTGACGCTTGATTTAGCCCTCGGCGGTGGATATCCGAAAGGGCGTGTGGTCGAGATCTATGGCCCTGAAAGTTCAGGTAAAACCACGCTGACGCTCCATGCGATTGCCGAGATTCAAAAGCGTGGAGGTGTAGCAGCGTTTGTGGATGCAGAGCACGCTCTTGATCCTCATATGCGGCATCCCTCGGTGTGGATGTTGAAAATCTTCTGGTGTCCCAGCCGG…	444
21151	S9902_21151	3	2.33	1.33	0.17	0	0	0.33	0.17	0	0	0.83	0.5	2.33	10.99	2	Yes	0.523659	4.46692	Synechococcus sp. CC9902	100	2242	recA	recombinase A	Replication and Repair	Genomic	ATGCCTGCTGACATGAAAACCACCGCTCCCGGTTCCGATGCTCGTTCCTCCGGAGAGCGCGATAAGGCGCTGAATTTGGTGCTCGGTCAAATCGAGCGAAATTTTGGCAAGGGCTCAATCATGCGCCTTGGTGATGCCTCCCGCATGAGGGTGGAAACCATCTCTACGGGCGCGTTGACCCTTGATTTAGCCCTCGGTGGTGGGTACCCCAAAGGTCGGGTGGTCGAGATCTATGGCCCTGAAAGCTCGGGTAAAACCACGCTGACGCTCCATGCGATTGCCGAGGTTCAAAAGCGTGGCGGTGTTGCAGCGTTTGTGGACGCTGAGCATGCACTGGATCCCCATTACGCGGCATCCCTGGGCGTGGATGTTGAGAACCTTTTGGTGTCCCAGCCGGAT…	1131
829757	CAM_READ_0163829757	11.17	1	6	0.5	0	0.67	3.33	2.5	1.33	0.83	0	2.67	4.33	34.33	0	0	NA	NA	Synechococcus sp. CC9902	86	1077	rpoD	RNA polymerase primary sigma factor	Transcription	Environmental	AATACCAGGGCAAGGGGCTAGAGCTTTTGGATCTGATTCAAGAAGGCTCTTTGGGGCTTGAACGTGCTGTTGAAAAATTTGATCCCACTCGGGGATACAAATTCTCCACCTATGCCTTTTGGTGGATTCGCCAAAGCATGACAAGGGCCATTGCTTGCCAATCCCGCACGATTCGACTCCCCGTTCATCTGAGCGAACGTCTCACCACGATTCGCAAAGTGAGTTTGGATTTGGCCCACAAACTTGGCGCCATGCCTAACCGGCTTGAAATTGCTGAGGAGATGGACATTGGGCTCGAGGAGCTTGATTCCCTCTTGCGTCAGGCCCTGACCACCAGCAGTCTTGATGCCCCTGTTAACGGAGAGGAAGGGCGGAGCTTCCTTGGCGACTTGATTGCCG…	506
477351	CAM_READ_0164477351	1	1.5	2	0.5	0.83	1	0.5	5.5	3.83	6.33	1.17	3.17	1.83	29.16	0	0	NA	NA	Synechococcus sp. CC9902	86	504	rpoD	RNA polymerase sigma factor	Transcription	Environmental	CTCAGTCAGGAGTTTGGACGCAAACCAACTGAAGAAGAGATTGCAGAATCAATGGAGATGACCATTGAGAAGCTTCGGTTTATCGCCAAGAGCGCTCAATTGCCCATCTCCCTGGAAACTCCTATCGGGAAAGAAGAGGATTCACGCTTGGGTGACTTCATCGAAGCCGACATCGAGAATCCTGAACAAGATGTTGCAAAAAATCTTCTTCGGGAAGATTTAGAAGGTGTACTGGCAACATTGAGCCCTCGCGAGCGAGATGTACTGCGGTTGCGCTACGGCCTTGATGACGGTCGCATGAAAACCCTTGAAGAGATTGGTCAGATCTTTGATGTAACGCGCGAGCGTATTCGCCAAATCGAAGCCAAGGCCCTTCGCAAATTGCGCCATCCAAACCGC…	439
571601	CAM_READ_0164571601	0	0.83	4.33	0	0.83	0.67	0.83	0	0	1	0.33	0	0	8.82	0	0	NA	NA	Synechococcus sp. CC9902	86	511	rpoD	RNA polymerase sigma factor	Transcription	Environmental	AGAGGACACCACCAAAACATCAGAGGGGAAAACGAAAAAAGCAGCCCCGAAAGCCACATCGGTGAAAAGCACGGCCAAGAAAACAACAGCGAAGAAAGCAGCCACAACAAAAGCCAAACCAGCAGCGGCCAAACCAGCGGCACCAGAACTCACAGCCGAGGAAAAAGCAAAAGCTGCCAGTGCAGAAAAAGAAGCCAAGGCCAAAGCTTTGGCAAGCATCAAAATCGGCCCAAAAGGGGTCTACACCGAAGATTCGATTCGTGTTTACCTGCAGGAGATCGGACGGATTCGTCTCTTACGTCCCGACGAAGAAATCGAACTGGCCCGCAAAATTGCCGATCTGCTTCATCTCGAAGAACTCGCCGCACAATTTGAAAGCGACAACGGGCGTGAGCCCGA…	437
608437	CAM_READ_0164608437	4	1.83	0	0	0	0	1.67	0.33	0	0.67	0	0	0	8.5	0	0	NA	NA	Synechococcus sp. WH8020	90	639	rpoD	RNA polymerase primary sigma factor	Transcription	Environmental	CGCACCATTCGCTTGCCTGTGCACTTAAGCGAGCGTCTCACCACCATTCGCAAAGTGAGTCTGGATCTTGCTCACAAGCTCGGAGCGATGCCGAGCCGCCTTGAGATTTCAGAAGCGCTTGATATGCCTGTTGAGGAGCTCGACTCCCTGCTGCGCCAGGCGCTCACCACCAGCAGTCTTGATGCTCCTGTGAATGGAGAGGATGGTCGTAGTTTCCTTGGCGATTTGATTGCCGATTCCTCTGCGGAAGAGCCTCTCGACAAGGTTGAACAGCGCATTCACCATGAACAACTTGGCCGCTGGTTGAGCCATCTCAGTGAGCAGGAGCAACACGTGCTCACCCTGCGTTTTGGTTTAAACGGCAATGAGCGCCACACCTTGGCTCAAATTGGCCGTTTG…	472
559591	CAM_READ_0164559591	6.17	0.17	0	0	0	0	0.17	0	0	0	0	0	1.33	7.84	0	0	NA	NA	Synechococcus sp. WH8020	90	627	rpoD	RNA polymerase primary sigma factor	Transcription	Environmental	TGGATCCGTCAGAGCATGACTCGGGCGATTGCTTGTCAGTCACGCACCATTCGCCTGCCGGTTCATTTGAGCGAGCGTCTCACCACCATCCGCAAGGTGAGTTTGGATCTTGCTCACAAGCTTGGAGCGATGCCGAGCCGCCTCGAGATTTCAGAAGCCTTGGATATGCCTGTTGAGGAGCTCGACTCCCTGCTGCGCCAGGCCCTCACCACCAGCAGTCTGGATGCTCCTGTGAATGGAGAGGATGGTCGCAGTTTCCTTGGCGATTTGATTGCAGACTCTTCTGCGGAAGAGCCTCTCGACAAGGTTGAACAGCGCATTCACCACGAACAACTTGGCCGCTGGTTGAGTCATCTCAGTGAGCAGGAGCAACACGTGCTCACCTTGAGGTTTGGTTTA…	471
613119	CAM_READ_0157613119	0.75	0.75	0	0	0	0	0	0	1.25	0	0	0	1.5	4.25	0	0	NA	NA	Synechococcus sp. CC9311	86	580	rpoD	RNA polymerase sigma factor	Transcription	Environmental	TCTCTATGCGGATCATGATGCTGGCCGATGAAAACGGTCAACCAAAGCACGTAAAGGCCAAAGGCAAGCCTGGCCTCGGAAGCCAAAGCAGCAACAAAGGCCACTACCAAAACAAAAGCGAGTAAAACCACCCCCAAAGCCAAAAACCAGCAAAGCCAGCGGCAAAGCAAAGGTCACCTCGACTGCAGCCAACCTGGACGCATCAGCTGATCAACTACTTGCTGCTACTGAGACAACTGCAAGCGCAGCAAAAGCCACTGAAGCGGCCGCAACTAAGGCCAAAGCAGAAGCGAAAGCCAAAGTTTTGGCGAGCATCAAAGTAGGGCCAAAAGGCGTTTATACCGAAGACTCCATTCGGGTTTACCTACAGGAAATCGGACGCATTCGCCTACTGCGACC…	510
328111	WesternChannelOMM_READ_06328111	1.5	0	1.25	0	0	0	0.25	0	0	0	0	0	0.25	3.25	0	0	NA	NA	Synechococcus sp. WH8020	90	674	rpoD	RNA polymerase primary sigma factor	Transcription	Environmental	AAATGATTACGGCCAATTTAAGGCTGGTGTCAATCTGCAAAGCGTTATCAAGGCAAGGGACTTGATCTTCTTGACCTCATCCAAGAGGGCACTCTCGGACTGACCAGAGCTGTTGAAAAATACGATCCCACCCGAGGCCATCGTTTTTCTACCTACGCCTATTGGTGGATTCGTCAAGGCTTGAACCGCGCCCTCTCTACGCAAAGCAGAACGATTCGTATCCCCTGTAAAATGTCAATGAAAAACTGACGAAATTACGTGCTGCCAAAGCGCGTCTCATGCAAAGCAATGGACTTGCCCCATCCGCGGAGCTATTGGCCGAAAGCATGAAGCTGCCGATCAGCGAAGTCGAGGACTTGTTGGGCTGTGAACTTCGCAGTGT	382
16601	S9902_16601	7.6	1	0.8	0	0.2	0.2	2	0.8	0.6	0	0	0.6	1.2	15	7	Yes	0.180769	6.42346	Synechococcus sp. CC9902	100	1867	rpoD	RNA polymerase primary sigma factor	Transcription	Genomic	ATGGTGTCCACAGCTTCTAAGCCGCTCGAGACGCAGCGTCGCCGTAGTAGCGATCCTGTGAGTTGGTATTTATCAACGATCGGAAGGATCCCTCTGCTGACGGCGGCAGAGGAAATTGAATTGGGGAATCAAGTGCAAGCCATGATGGCTTTCACGGAAGATGGTTCGAAGGACTTCAAAGTTGAAGACCTAACCACCAAACAGCGGCGAATGCTGCGTATTGGTCGTCGAGCTAAAGAACGAATGATGAAGGCGAACCTTCGCCTTGTCGTCAGCGTTGCCAAGAAATATCAGGGCAAAGGCCTGGAGCTTTTGGATTTGATCCAGGAAGGATCGCTTGGCTTGGAACGGGCTGTTGAAAAATTCGATCCCACCCGGGGATACAAGTTTTCGACCTAT…	942
250143	CAM_READ_0110250143	1	2.25	1.75	0	0	0	0.5	1	1.25	0	0	0	1.5	9.25	9	Yes	0	7.88206	Synechococcus sp. CC9311	90	841	rpoD	RNA polymerase primary sigma factor	Transcription	Environmental	GGTGAGTTCTCTGAGTGCTTTTCTCGGCGAAATCGGTCGGCATCAACNGTTGACGCCTGAACAGGAATTAACCCTGGGCCGCAAGGTGCAGGCTATGGCGGCTCTCACTGAGCGCTGCACGATGGCAGGTGGCGAAGGAGACTGCGTGCGTTTATAACGACGCAGAGAAGCGCACAATTAAGCGCGGAGAAAAAGGCAAAAAATCAAATGATTACGGCCAACTTAAGGTTGGTTGTCAATCTTGCGAAGCGCTACCAAGGCAAGGGACTAGATCTTTTAGACCTCATCCAAGAGGGCACACTCGGACTGACCAGGGCTGTTGAAAAATACGATCCCACTAGAGGCCATCGTTTTTCTACTTATGCCTATTGGTGGATTCGTCAAGGCTTGAACCGAGCC…	435
562945	CAM_READ_0167562945	6	0.67	0.67	0	0	0	1.33	0	0	0	0	0	0	8.67	7	Yes	0.483684	4.66899	Synechococcus sp. WH8020	92	1267	rpoD	RNA polymerase primary sigma factor	Transcription	Environmental	ATCAGACACGATGAAGGCCAATCTTCGCCTTGTCGTGAGTGTCGCCAAGAAATATCAAGGCAAAGGCCTTGAGCTTCTCGATCTCATTCAAGAGGGATCCCTTGGCTTGGAACGGGCGGTTGAGAAGTTTGATCCCACCCGTGGATACAAGTTTTCGACATATGCCTTTTGGTGGATCCGTCAGAGCATGACTCGGGCGATTGCTTGTCAGTCACGCACCATTCGCCTGCCGGTGCACTTGAGCGAGCGTCTCACCACCATCCGCAAGGTGAGTTTGGATCTTGCTCACAAGCTTGGAGCGATGCCGAGCCGCCTCGAGATTTCAGAAGCCTTGGATATGCCTGTTGAGGAGCTCGACTCCCNGCTGCGCCAGGCTCTCACCACGAGCAGTCTTGATGC…	423
18331	S9902_18331	0	0	1.33	1.33	0.33	0	0	0	0	0.67	0	0	0	3.66	4	Yes	0.246842	5.94325	Synechococcus sp. CC9902	100	2605	rpoD	RNA polymerase sigma factor	Transcription	Genomic	ATGACTCCTGCTGCCACCAAATCCGCGAAACCGGACATCGTTCTATTGGCGAACGCCGAAGGACAGGTGAAGAATGTGGTGCCGACTGCCAAGGGCGCAACAAAAAAAGCTCCGGCACGGAAACGGAAGGCAAGCTCAAGCGCTGAGGATTTGAATGCGGCAGCAGACGAACTTCTTGCCAAGGCAGACGGCAGCACCAAGACATCAGAAGGGAAAACAAAAAAAGCAGCAACAAAGGCGACGTCAGTGAAAAGCGCGGCCAAGAAAACAACAGCCAAGAAAGCAGCTACACCAAAAGCCAAAACTGCGGCACCAGAACTCACAGCTGAGGAAAAAGCCAAAGCGGCCAGTGCAGAAAAAGAAGCCAAAGCAAAGGCTTTGGCCAGCATCAAAATCGGG…	1356
7761	S9311_07761	1.5	0	0	0	0	0	1	0	0	0	0	1	0	3.5	7	Yes	0.35	5.45111	Synechococcus sp. CC9311	100	1867	rpoD	RNA polymerase primary sigma factor	Transcription	Genomic	ATGGTTTCCTCAACAGCTCGGACCTCCGAGACTCAGAGACGCAGAAGCAGTGATCCGATTAGTTGGTATTTGGCGACGATTGGCCGAATACCACTGCTGACTGCTGCTGAAGAAATCGAGCTTGGCAATCAGGTCCAGAAGTTCATGGAGCTGACGCAGGATGGATCGGTCTCTCCTGACAGTGAGGAGTTCAGCTCCAAAGATCGCCGCATGATTCGCGTTGGCCAGCGAGCCAAGCAACGGATGATGAAAGCCAACCTTCGCCTTGTGGTGAGTGTCGCGAAAAAATATCAAGGCAAAGGCCTTGAGCTTCTCGATCTCATTCAAGAGGGTTCCCTTGGCTTGGAACGCGCCGTTGAGAAGTTTGATCCAACTCGCGGATACAAGTTTTCGACTTAC…	942
736527	CAM_READ_0164736527	17	1.17	1.33	1	0	0.33	3	0	0	0	0	2.33	1.33	27.49	0	0	NA	NA	Synechococcus sp. CC9902	88	1158	sigAII	type II alternative sigma-70 family RNA polymerase sigma factor	Transcription	Environmental	CCATGGTGTCCTCAGCTTCTAAGCCGCTCGAGACCCAGCGTCGCCGTAGTAGCGATCCTGTGAGTTGGTATTTGTCCACGATCGGAAGAATCCCCCTGCTGACCCGGCAGAGGAAATTGAATTAGGCAATCAAGTGCAAGCCATGCAGGCTTTCACGGAAGACGGTTCTAAGGATTTCAAGGTTGAGGATCTAACAACGCAACAGCGACGCATGTTGCGGATTGGCCGTCGTGCCAAAGAAAGAATGATGAAGGCGAACCTTCGTCTTGTTGTCAGCGTCGCCAAGAAATACCAGGGCAAAGGGCTAGAGCTTTTGGATCTGATCCAAGAAGGCTCTTTGGGTCTTGAACGTGCTGTTGAAAAATTCGATCCAACTAGGGGATACAAATTCTCCACTTA…	485
32843	CAM_READ_0165032843	0.6	1.2	0.4	0.4	1.2	0.2	0.2	1.2	3	2.2	0.2	0.4	0.8	12	0	0	NA	NA	Synechococcus sp. CC9902	88	739	sigAII	type II alternative sigma-70 family RNA polymerase sigma factor	Transcription	Environmental	GGTGCAGTCCAACTTGCGCCTTGTGGTGTCGATTGCGAAGAAGTACATGAATCGAGGCCTGAGCTTCCAGGACTTGATTCAAGAAGGCAGCCTTGGCCTCATCCGCGCCGCTGAAAAATTCGATCACGAAAAGGGTTATAAATTCTCCACATATGCCACCTGGTGGATCCGTCAGGCGATCACACGGGCGATCGCCGATCAAAGCAGGACGATTCGCCTGCCTGTTCACCTTTACGAAACTATTTCACGAATCAAGAAAACAACAAAAGTGCTCAGTCAGGAGTTTGGACGCAAACCCACTGAAGAGGAGATTGCAGAATCAATGGAGATGACCATTGAGAAGCTTCGGTTTATCGCCAAGAGCGCTCAATTGCCTATCTCCCTGGAAACTCCTATCGG…	410
821078	WesternChannelOMM_READ_06821078	1.5	2	0	0	0	0	0.5	0	1.5	0	0	0	2	7.5	0	0	NA	NA	Synechococcus sp. CC9311	88	800	sigAII	type II alternative sigma-70 family RNA polymerase sigma factor	Transcription	Environmental	CATCAACTGTGACGCCTGAAACCAGGGAATTAACCCCTGGGGCCCGCAAGGTGCAGGCTATGGCAGCTCTGACTGAGCGATGCACGATCGCAGGTGGCGAAGGAGATGCGTGCGTTTATAACGACGAAGAGAAGCGCACAATCAAACGCGGAGAAAAGGCAAAAAATCAAATGATTACGGCCAATTTAAGGTTGGTTGTCAATCTTGCGAAGCGCTACCAAGGCAAGGGACTTGATCTTCTTGACCTCATCCAAGAGGGGACGCTCGGACTGACCAGAGCTGTTGAAAAATACGATCCCACCCGAGGCCATCGTTTTTCTACCTATGCCTATTGGTGGATTCGCCAAGGCTTGAATCGCGCCCTTTCTACGCAAAGTAGAACGATTCGCATCCCTGTCA…	446
642521	CAM_READ_0164642521	3.67	0.83	0	0	0	0	1	0	0.33	0	0	0	1	6.83	0	0	NA	NA	Synechococcus sp. WH8020	89	1156	sigAII	type II alternative sigma-70 family RNA polymerase sigma factor	Transcription	Environmental	TCGTTTAGTGGTGAGTGTCGCGAAGAAATATCAAGGCAAGGGCCTTGAACTTCTCGACCTCATTCAGGAAGGTTCACTTGGATTGGAACGGGCTGTTGAGAAATTTGATCCAACCCGCGGTTATAAGTTTCAACCTACGCCTTTTGGTGGATTCGCCAGAGCATGACTCGGGCAATCGCTTGTCAGTCACGCACCATTCGCTTGCCTGTGCACTTAAGCGAGCGTCTCACCACCATTCGCAAAGTGAGTCTGGATCTAGCTCACAAGCTCGGAGCGATGCCGAGCCGCCTTGAGATTTCAGAAGCGCTTGATATGCCTGTTGAGGAGCTCGACTCCCTGCTGCGCCAGGCGCTCACCACCAGCAGTCTTGATGCTCCTGTGAATGGAGAAGATGGTCGC…	473
494967	CAM_READ_0164494967	0	0	0	0	2	0.67	0	0	0.67	0	0	0	0.33	3.67	0	0	NA	NA	Synechococcus sp. CC9902	87	542	sigAII	type II alternative sigma-70 family RNA polymerase sigma factor	Transcription	Environmental	TTCACATCACTGAGATGCTGAATAAGCTCAAAAAGGGCCAACGAGAGCTAAGCCAAGAGCTCGGTCGTACCCCGACCGTTACTGAGCTTGCTCAATTCGTCGATTTGCCTGAAGATGAAGTCAAGGATCTGATGTGTCGTGCTCGTCAGCCGGTGAGCCTTGAGATGAAGGTGGGTGATGGCGACGACACTGAATTGTTGGAGCTTCTTTCCGGAGACAATGAGCTCCCAAGCGATCAAGTTGAGGAGGATTGCCTCAAGGGTGATTTGCGCAGCTTGCTGGGTCAGCTGCCCCACCTGCAGGAGCAAGTGCTCCGGATGCGTTTCGGCATGGATGGTGAAGATCCGATGAGCCTCACTGGCAGTCGGTCGGATCCTTGGCATGAGCCGTGATCGAGTA…	460
862303	CAM_READ_0164862303	0.67	0	0	0	0.67	0	0.67	0	0.33	0.33	0	0	0.67	3.34	0	0	NA	NA	Synechococcus sp. CC9311	89	1495	sigAII	type II alternative sigma-70 family RNA polymerase sigma factor	Transcription	Environmental	TGCGTGGCGTAGAGAAATTTGATCCCACCCGGGGCTACAAATTCAGCACCTATGCGTACTGGTGGATTCGTCAGGGCATCACGCGTGCGATTGCGGAGAAGAGCCGCACCATTCGCCTACCGATTCACATCACCGAGATGTTGAACAAGCTCAAGAAAGGCCAACGGGAATTAAGCCAAGAGCTAGGTCGCACTCCATCGGTTACGGAATTGGCATCGTTTGTGGAGCTTCCAGAAGATGAGGTGAAGGATTTGATGTGCCGGGCCCGCCAGCCAGTGAGTTTGGAGATGAAGGTGGGTGATGGCGATGACACCGAACTGCTGGAATTGTTGGCCGGCGATGGTGAGCTGCCATCAGATCAGGTGGAAGGCGAATGCTTGAAGGGAGACTTGGCTGATT…	457
968369	CAM_READ_0161968369	2.8	3.4	0.8	2.4	1.2	0	2	0.6	0.2	0	0.2	0	2.2	15.8	4	Yes	0.835053	1.72545	Synechococcus sp. WH8020	94	1321	sigAII	type II alternative sigma-70 family RNA polymerase sigma factor	Transcription	Environmental	AAGAAATTGAGCTTGCACATCATGTGCAGGCCATGAAAGAGCTGCTTGAAACTCAAGAAGAAGACCGCACACCCAAACAACGCCATCGCATTCGGATGGGGAAGAGGGCACGTGATCGAATGATGGCTGCCAACCTCAGGTTGGTGGTAAGTGTCGCCAAGAAATACCAAAACCAAGGTCTCGAACTTCTCGACCTCGTTCAGGAAGGAGCCATAGGACTTGAGCGTGCCGTCGACAAATTTGACCCAGCCATGGGTTACAAGTTTTCGACTTACGCCTACTGGTGGATTCGTCAAGGCATGACAAGGGCGATCGACAACAGTGCGCGCACGATCCGCCTGCCGATTCACATCAGTGAAAAGCTGTCGAAAATGCGCAAGATCACCCGGGAGCTCTCCC…	418
24741	S9902_24741	2.17	1.33	1.17	0.33	0.67	0	0.17	0.17	1.17	1.83	0.17	0.83	0.33	10.34	1	Yes	0.56098	4.06024	Synechococcus sp. CC9902	100	1957	sigAII	type II alternative sigma-70 family RNA polymerase sigma factor	Transcription	Genomic	ATGGGGATCCCTCTGGAGACTTCCAAGTCGACAACTCAGTCGACCCGGAAGCAACCTGCTTTGCCGTCCACCGGACGTCGCTCAGCTTCACGTCAAAGTGGACGCTTGGCAACAGACTCCATTGGCTTTTATCTGAGCAGTATTGGACGCGTTCCACTGCTCACCGCAGCCGAAGAAATTGAGCTCGCCCATCATGTCCAAGACATGAAACAGCTCAAAGAGTTGCCCCAAGAGGAACTCACCTCGCGACAAAAGCACAAGATCCGGATGGGAAAACGTGCCCGCGATCGAATGATGGCAGCCAACCTGCGACTGGTTGTGAGCGTGGCCAAGAAGTATCAAAACCAAGGTTTGGAATTGCTCGACCTCGTTCAAGAGGGAGCGATTGGCCTCGAGCGT…	987
134573	CAM_READ_0165134573	0.25	0	3	0.25	0	0	0.5	0.25	2.5	2.5	0.25	0.25	0	9.75	1	Yes	0.179167	6.48626	Synechococcus sp. CC9902	89	903	sigAII	type II alternative sigma-70 family RNA polymerase sigma factor	Transcription	Environmental	CGGATTCGTCTCTTACGTCCCGACGAAGAAATCGAACTGGCCCGCAAAATTGCCGATCTGCTTCATCTCGAAGAACTCGCCGCACAATTTGAGAGCGACAACGGGCGTGAGCCCGACAAAAAAGAGTGGGCAGCACTCGTTGAAATGCCGCTCATTCGCTTCCGCCGCCGGCTAATGCTGGGCAGGCGAGCCAAAGAAAAAATGGTGCAGTCCAACCTGCGCCTTGTGGTGTCGATTGCGAAGAAGTACATGAATCGAGGCCTGAGCTTCCAGGACTTGATTCAAGAAGGCAGCCTTGGCCTCATTCGCGCCGCTGAAAAATTCGATCACGAAAAGGGTTACAAATTCTCCACTTACGCCACCTGGTGGATCCGTCAGGCGATCACACGGGCGATCGCG…	480
120989	CAM_READ_0110120989	0	1.2	0.4	0	0.4	0.2	0.4	0.2	0.2	0	0	0	1.8	4.8	6	Yes	0.487949	4.62619	Synechococcus sp. CC9311	92	887	sigAII	type II alternative sigma-70 family RNA polymerase sigma factor	Transcription	Environmental	TTATACCGAAGACTCCATTCGGGTTTACCTACAGGAAATCGGACGCATTCGCCTACTGCGACCGGACGAAGAGATTGAATTGGCTCGCAAAATTGCGGACCTCCTGCATCTCGAGGAACTCGCTGCGCAGTTCGAAAGCGATAACGGCAAACTTCCTGATACCAAGGAATGGGCAGCACTGGTTGAGATGCCAGTGATTCGCTTCCGCCGAAGACTGATGCTGGGCAGACGCGCCAAAGAAAAAATGGTGCAATCCAACTTGCGCCTGGTTGTGTCGATTGCCAAGAAATACATGAACCGAGGCCTGAGCTTTCAGGACCTCATTCAGGAAGGCAGCCTAGGTCTCATTCGTGCTGCAGAAAAATTCGATCACGAAAAAGGGTATAAGTTCTCGACCTA…	518
8439	CAM_READ_0165008439	0	0	1.6	0	0	0.6	0	0.6	0.6	0	0	0	0.6	4	3	Yes	0.631	3.28577	Synechococcus sp. CC9902	91	994	sigAII	type II alternative sigma-70 family RNA polymerase sigma factor	Transcription	Environmental	CGAGGCGCTTTTAAAACAGCAGCGCGAGCTGTCCGACACCAATCCAACCATTGGTGAACTGAATCGCTTAGAGGATCTCCAACGCCGCGAGGCGAATCACCACAGCCATTGGCCCACCAAACAAGAGTGGGCCCGCGCCGCGGGTCTGACCCTTCAGGAGCTGCAATCACGAATCGATGCGGGCTACGAGGCGTGGGCTGACAAAGCCGCAATCGACGCCAAAGAACTCAAGGTGAGCCTGCGCAACGGACGACGGGCTAAGGACCACATGATCCAGGCCAACCTCAGGCTTGTGGTTGCTGTGGCCAAGAAATACCAACAGCGTGGTATGGAAATCCTTGACCTGGTTCAGGAAGGAACCCTTGGCCTAGAACGGGCTGTTGAAAAATTCGATCCCAC…	450
923399	CAM_READ_0164923399	1.83	1	0	0	0	0	0	0	0.5	0	0.33	0	0	3.66	2	Yes	0.798519	2.40336	Synechococcus sp. CC9902	92	1126	sigAII	type II alternative sigma-70 family RNA polymerase sigma factor	Transcription	Environmental	TACGAGGCGTGGGCTGACAAAGCCGCAATCGACGCCAAAGAACTCAAGGTGAGCCTGCGCAACGGACGACGGGCTAAGGACCACATGATCCAGGCCAACCTCAGGCTTGTGGTGGCTGTGGCCAAGAAATACCAACAGCGGGGGATGGAAATCCTTGACCTGGTTCAGGAAGGAACCCTTGGCCTCGAACGGGCTGTTGAAAAATTCGATCCCACCCGGGGCTTCCGATTCAGCACGTATGCCTACTGGTGGATTCGCCAAGGCATGACCCGGCATTGCCACCCAGAGCCGCACCATTCGGCTCCCTGTGCACATCACAGAGAAGCTCAACCGGATCAAACGGGTCCAGCAGGACATCGCCAGCAACGAGGGGCGTATCGCCTCGATTGCCGATCTAGC…	447
86295	CAM_READ_0110086295	0	0.67	0	0	0	0	0	0	0	0	1.5	1.33	0	3.5	5	Yes	0.562308	4.01734	Synechococcus sp. WH8020	93	1163	sigAII	type II alternative sigma-70 family RNA polymerase sigma factor	Transcription	Environmental	CCTTGGCTCTGCTCCCCGATGCGGACCTCGTGCGTTCGTACTTGCGAGACATCGGCCGGGTGCCGTTGTTGAGCCATCAACAGGAGATCACCCTGGGCCGTCAGGTGCAGGAGTTGATGGATTTAGAGGCGTTAGAAGCAGAACTCAAGGATCAGCGTGGCGGAGAAGAGGTCGCAAGAGAAGAGTGGGCCAAAGCTGCTGGCGTGAGTGCGGCGCAACTGAAGCGAAAGCTGCAGGCGGGTCGCCGCGCCAAGGAGCGGATGGTGGCTGCCAACTTGCGATTGGTGGTGAGCGTCGCCAAGAAATACACCAAACGGAATATGGAACTGCTGGATTTAATCCAGGAGGGAACGATTGGCTTGGTGCGTGGTGTAGAGAAATTTGAT	386
835295	CAM_READ_0109835295	1	0	0	0	0	0	0	0	0	1	0	0	3	5	0	0	NA	NA	Synechococcus sp. CC9311	88	471	sodC	Copper/zinc superoxide dismutase	Unclassified	Environmental	AAGGGGCCTCCATTGCAGGTCTGGCAGCACTCGGACATTGGGATCCTGACCAAACAGACACCCATCTCGGACCTTTCGGCAATGGCCATCGCGGTGACCTCAGCCGATTAGTGGTGGACCGTGATGGCAATACCACCACAAGCGTTGTGGCACCAAGGCTCAAGGCCTCAGACCTTCGCGGCCGTGCCCTTGTGGTGCATGCAGGGAGTGATACTTACACCGATACGCCTCCCCTAGGCGGAGGTGGTGCTCGCATTGCCTGCGGTGTCGGGTCTTGAACGCACCACGTTTGCTCCTCATTCATCCCATTGGCGTTGGCTTATCCAGTCGGTTTTGGGATCGTTTTATTACCTGTTGGCGAGCCTCAGACCAAACGACTGCATT	384
385643	CAM_READ_0155385643	1	0	0	0	0	0	0	0	0	1	0	0	3	5	0	0	NA	NA	Synechococcus sp. CC9311	87	437	sodC	Copper/zinc superoxide dismutase	Unclassified	Environmental	ACTTGCATGCTGGCGATCAGTGTGATCCNCAACCAATGCTNAAGGGGCCTCCATTGCAGGTCTGGCAGCACTCGGACATTGGGATCCTGACCAAACAGACACCCATCTCGGACCTTTCGGCAATGGCCATCGCGGTGACCTCAGCCGATTAGTGGTGGACCGTGATGGCAATACCACCACAAGCGTTGTGGCACCAAGGCTCAAGGCCTCAGACCTTCGCGGCCGTGCCCTTGTGGTGCATGCAGGGAGTGATACTTACACCGATACGCCTCCCCTAGGCGGAGGTGGTGCTCGCATTGCCTGCGGTGTCGGGTCTTGAACGCACCACGTTTGCTCCTCATTCATCCCATTGGCGGACACGCGAG	365
269829	CAM_READ_0165269829	0	0	0.5	0	0.25	0	0.5	0	0.75	0	1	0.25	0	3.25	0	0	NA	NA	Synechococcus sp. CC9902	81	255	sodC	Copper/zinc superoxide dismutase	Unclassified	Environmental	TATCCGGACTAGCCGCAGGAGGCCACTGGGATCCAGACAACAGTGGAACTCACCTTGGACCCTTTGGGAATGGACATCGCGGCGACCTCAGCAAACTGATTGTTGATGCAAATGGAACAACGAATACGAGCATCGTTGCACCACGCCTCACTACAAACGACCTCAAGGACCATGCCTTGATTGTTCACGCCGGAGGTGACACCTACAGCGACACACCAGCTCTAGGAGGAGGAGGCGCACGCGTTGCTTGTGGTGTAATCAATTAATGAGTCAGGCAATATGTTTGTTGAATATAATTCAATTCAAAATAATTTTACAAAAATAAAATATGGTCACGCATG	341
8031	S9902_08031	2	0.67	0.67	0	0	0.33	0.33	1	0	0	0	0.33	0.33	5.66	9	Yes	0.321364	5.63759	Synechococcus sp. CC9902	100	3021	zwf	glucose-6-phosphate 1-dehydrogenase	Carbohydrate Metabolism	Genomic	ATGGTCGCCACGATCACCAATCCGCTCCGCGTTGGACTTCGACAGGAACGGGTCATTGCACCGCAATGTTTGGTGATTTTTGGAGCCAGCGGCGATTTAACCCACCGCAAACTTGTGCCGGCGTTGTTCGAACTGTTCAAACAACGCCGACTCCCCAGTGAATTCGCTCTTTTGGGTTGCGCCCGTCGCCCTTGGACCGATGACGTGTTTCGGGGAAAAATGGCTGAAGCACTCGCCCCCCGCATTGCAGAGAATCCAGCGGCGTGGGATCAATTCGTCGGCAAGCTGTTTTACGAACCAGTTGACCTGCAAAAACCAGAGGATGTCGTGCGGCTCGGCGGACGCCTTGAACTGATCGATCAACAGTGCGCCACTCGGAGCAATCGCACCTTCTACCTC…	1524

## Sheet: Euks.CCS
Transcript ID	Full transcript ID	SRX209108	SRX209284	SRX209285	SRX209286	SRX209287	SRX209288	SRX209289	SRX209290	SRX209295	SRX209296	SRX209297	SRX209298	SRX209299	Transcription Sum	Transcription cluster	Significant cluster assignment?	False discover rate for periodicity	Fourier	Closest organism	NT identity %	Total score	Gene	Gene annotation	Pathway KEGG	Source of the target seq	Sequence	Sequence length
cercozoa_26	rbcL_cercozoa_contig__26	2.25	1.75	0.25	1	0.75	5.75	4	1.25	0.75	4.5	4.75	7.75	9.25	44	2	Yes	0.211947	5.60332	Prasinoderma coloniale CCMP1220	98	1301	rbcL	ribulose-bisphosphate carboxylase large chain	Energy Metabolism	Environmental	GTAACGTATTTGGTTTCAAGGCTCTACGTTCACTTCGTCTAGAAGATCTACGTATCCCTCCAGCTTACGTTAAGACTTTCGCTGGACCTCCTCACGGTATCCAGGTTGAGCGTGATAAGCTTAACAAGTATGGACGTGCTCTACTAGGTTGTACTATTAAGCCTAAGCTAGGTCTTTCTGCTAAGAACTACGGACGTGCAGTATACGAATGTCTTCGTGGTGGTCTTGATTTCACAAAGGATGATGAGAACGTAAACTCACAGCCATTCATGCGTTGGCGTGATCGTTTCCTTTTCGTAGCTGAGGCTTCTTACAAGGCTCAAGCAGAAACTGGAGAGGTTAAGGGTCACTACCTAAACGCAACTGCTGCTACTTGTGAAGAAATGCTTAAGCGTGCAG…	757
chlorophyceae_333	rbcL_chlorophyceae_contig_333	21.67	8.67	9.17	65	55	111.83	17.17	10.33	12	27.67	31.83	62.5	53	485.84	2	0	0.11925	7.04631	Micromonas sp. RCC299	98	2403	rbcL	ribulose-bisphosphate carboxylase large chain	Energy Metabolism	Environmental	GGATTCAAGGCTGGAGTTAAGGACTACCGTTTAACTTACTACACTCCTGACTACCAAGTACAAGCAACTGATGTACTCGCAGCATTCCGTATGACTCCACAGCCAGGTGTACCTGCTGAAGAGTGTGGAGCAGCTGTAGCAGCTGAGTCTTCAACTGGAACATGGACAACTGTATGGACTGATGGTCTTACTCAGCTTGACCGTTACAAGGGTCGTTGTTACGACATCGAGCCAGTTCCTGGAGAAGATAACCAGTTCATCGCATACGTAGCTTACCCACTTGACTTATTCGAGGAAGGTTCTGTAACTAACCTTTTCACATCAATTGTAGGTAACGTATTCGGTTTCAAGGCACTTCGTGCACTTCGTTTAGAGGACTTACGTATTCCTGTAGCTTAC…	1386
chlorophyceae_341	rbcL_chlorophyceae_contig_341	3	7.33	5.67	18	5.33	28.33	5.67	14.67	5.33	16	21.67	22	28	181	2	Yes	0.579722	3.11299	Micromonas sp. RCC299	87	1599	rbcL	ribulose-bisphosphate carboxylase large chain	Energy Metabolism	Environmental	AAAAGACTACCGTTTAACGTACTACACTCCTGATTACCAGGTATCTGAGACTGATATTCTTGCAGCATTCCGTATGACACCACAACCAGGTGTACCACCAGAAGAGTGTGGAGCAGCTGTAGCAGCTGAGTCATCAACTGGTACTTGGACTACTGTATGGACTGACGGACTTACTCAACTTGACCGTTACAAGGGACGTTGTTACGATATCGAGCCAGTTCCTGGTGAAGATAACCARTACATCGCTTACGTTGCTTACCCACTCGACCTTTTCGAGGAAGGATCAGTAACTAACCTTTTCACATCAATCGTTGGTAACGTATTCGGATTCAAGGCTCTTCGTGCACTTCGTTTAGAAGATTTACGTATYCCTGTAGCTTACTGTAAGACTTTCCAGGG…	1331
chlorophyceae_345	rbcL_chlorophyceae_contig_345	0	1	0	4.5	1	6	1.5	2	0	1	2	2.5	3.5	25	1	0	0.406258	4.14958	Ostreococcus tauri RCC1561	93	2089	rbcL	ribulose-bisphosphate carboxylase large chain	Energy Metabolism	Environmental	AAAGACTACCGTTTAACATACTACACACCTGACTACCAGGTAAAGGATACTGATGTTCTTGCAGCATTCCGTATGACTCCACAACCTGGAGTACCTGCAGAGGAGTGTGGAGCAGCTGTAGCAGCTGAGTCATCAACTGGTACTTGGACTACTGTATGGACWGATGGTCTTACTCARCTTGACCGTTACAAGGGWCGTTGTTACGACMTCGAGCCWGTTCCAGGTGARGACAACCAGTACATCGCRTACGTTKCTTACCCACTCGACCTTTTCGAGGAAGGATCAGTAACTAACCTTTTCACATCAATCGTAGGWAACGTATTCGGATTCAAGGCACTTCGTGCTCTCCGTTTAGAAGACCTTCGTATTCCTGTAGCATACTGTAAGACTTTCCAGGGT…	1367
chlorophyceae_358	rbcL_chlorophyceae_contig_358	3.5	3.25	4.5	14.25	11.5	27.25	7.5	9.75	4.5	11	22.25	16.25	29.5	165	2	Yes	0.30587	5.00212	Micromonas sp. RCC299	92	1669	rbcL	ribulose-bisphosphate carboxylase large chain	Energy Metabolism	Environmental	TAAAGATTACCGTTTAACATACTACACACCTGATTACCAGGTACAAGCAACTGATGTTCTTGCAGCATTCCGTATGACACCACAACCAGGTGTACCTTGTGAAGAGTGTGGAGCAGCTGTAGCAGCTGAGTCWTCAACTGGWACWTGGACAACTGTATGGACTGATGGTCTTACTCAGCTTGACCGTTACAAGGGTCGTTGTTACGATATCGAGCCAGTTCCTGGTGAAGATAACCAGTACATCGCGTACATTGCTTACCCAATCGACTTATTYGAGGAAGGGTCAGTAACTAACCTTTTCACATCTATTGTAGGTAACGTATTCGGATTCAAGGCACTTCGTCGACTTCGTTTAGAGGATTTACGTATTCCTGTAGCTTACTGTAAGACTTTCGTTGG…	1105
chlorophyceae_369	rbcL_chlorophyceae_contig_369	12	10.5	2.5	2.5	11.5	31	16.5	7	10.5	31.5	34.5	62.5	69.5	302	2	Yes	0.33036	4.79504	Pyramimonas sp.	100	1909	rbcL	ribulose-bisphosphate carboxylase large chain	Energy Metabolism	Environmental	TTAAAGATTACCGCCTTACTTACTACACTCCTGACTACCAAGTAAAGGAAACTGATATTCTTGCGGCTTTCCGTATGACTCCTCAGCCTGGTGTACCACCTGAAGAGTGTGGCGCAGCTGTAGCAGCAGAATCTTCTACAGGTACTTGGACTACAGTATGGACTGATGGTCTTACTAGCCTTGACCGTTACAAGGGTCGTTGTTACGATATCGAGCCAGTTCCAGGTGAAGAGAACCAGTACATTTGTTACATTGCTTACCCAATCGATCTTTTCGAAGAAGGTTCTGTAACTAACCTATTTACTTCAATTGTAGGTAACGTATTCGGTTTCAAGGCACTTCGTCGTCTTCGTCTTGAGGATTTACGTATTTCTTCTGCTTACTGTAAGACTTTCCTAG…	1066
chlorophyceae_383	rbcL_chlorophyceae_contig_383	18.33	19.33	12.67	53.33	32	102	19	33.33	22.67	41.33	63.33	70	72.67	559.99	2	Yes	0.2474	5.40055	Ostreococcus tauri RCC1561	87	1472	rbcL	ribulose-bisphosphate carboxylase large chain	Energy Metabolism	Environmental	AACTGGTACTTGGACTACTGTATGGACTGACGGACTTACTCAACTTGACCGTTACAAGGGGCGTTGTTACGATATCGAGCCAGTTCCTGGTGAAGATAACCAATACATCGCTTACGTTGCTTACCCACTCGACCTTTTCGAAGAAGGATCDGTTACTAACCTTTTCACATCAATCGTTGGTAACGTATTCGGATTCAAGGCTCTTCGTGCACTTCGTTTAGAAGATTTACGTATTCCTGTAGCTTACTGTAAGACTTTCCAGGGTGCTCCTCACGGAATCCAGGTTGAGCGTGATAAGTTAAACAAGTACGGACGTGGTCTCCTTGGATGTACTATTAAGCCGAAGCTTGGACTTTCTGCTAAGAACTACGGTCGTGCAGTATACGAGTGTCTTCGTGG…	1199
chlorophyceae_385	rbcL_chlorophyceae_contig_385	0	0.33	1	2.67	1.5	2	0	0.33	0.17	0	0.5	0	1	9.5	3	Yes	0.404719	4.10121	Micromonas pusilla strain CCMP490	100	1663	rbcL	ribulose-bisphosphate carboxylase large chain	Energy Metabolism	Environmental	TCATCAACTGGTACTTGGACAACTGTATGGACTGATGGTCTTACTCAGCTTGACCGTTACAAGGGTCGTTGTTACGATATCGAGCCAGTTCCTGGTGAAGATAACCAGTACATTGCATACATTGCATACCCAATCGACTTATTTGAGGAAGGGTCAGTAACTAACCTTTTCACATCAATTGTAGGTAACGTATTCGGATTCAAGGCACTTCGTGCACTCCGTTTAGAGGACTTACGTATTCCAGTAGCTTACTGTAAGACTTTCCAGGGTGCTCCTCACGGAATCCAGGTTGAGCGTGATAAGTTAAACAAGTACGGACGTGGTCTTCTTGGATGTACTATTAAGCCTAAGCTTGGACTTTCTGCTAAGAACTACGGTCGTGCAGTATACGAGTGTCTT…	951
chlorophyceae_389	rbcL_chlorophyceae_contig_389	186.33	15.5	44.17	89.83	151.17	297	75.5	28.67	33.67	67	115.83	157.33	187	1449	1	0	0.293	7.23487	Ostreococcus tauri RCC1561	90	681	rbcL	ribulose-bisphosphate carboxylase large chain	Energy Metabolism	Environmental	TGGTCTTCGGCTAAGAACTACGGACGTGCAGTATACGAGTGTCTCCGTGGTGGACTTGACTTCACTAAGGATGACGAGACGTAAACTCACRGMCATTCATGCGCTGGCGTGACCGTTTCCTTTTCGTAGCTGAGGCTATCTACAAGTCACAAGCTGATACTGGTGAGGTTAAGGGACACTACCTTAACGCAACAGCTGGAACTTGTGAAGATGGAATGAAGCGTGCGGTTTGTGCTAAAGAACTTGGTATGCCTATTATCATGCACGACTACCTTACTGGTGGTTTCACTTACAACACAACTCTTGCTCACTACTGTCGTGACCACGGACTTCTTCTCCACATTCACCGTGCAATGCACGCAGTAATTGACCGTCAGCGTAACCACGGAATCCACTTCC…	508
diatoms_1172	rbcL_diatoms_contig_1172	0.17	0	0	0.83	0.17	1.17	0.33	0.17	0.83	0	0.33	0.5	0.33	4.83	0	0	NA	NA	Thalassiosira tumida strain CCMP1469	95	2199	rbcL	ribulose-bisphosphate carboxylase large chain	Energy Metabolism	Environmental	TCACACCACAACCAGGTGTAGATCCAGTAGAAGCTGCTGCTGCYGTAGCAGGTGAATCTTCWACTGCAACTTGGACTGTTGTRTGGACAGATTTATTAACAGCTTGTGAACGCTACCGTGCTAAAGCTTACCGTGTAGATCCAGTRCCWARTGCAACWGATCAATAYTTTGCRTTTATYGCATAYGAATGTGATTTATTYGAAGAAKCTTCTTTATCTAATTTAACAGCRTCTATTATTGGTAACGTTTTTGGATTYAAAGCARTTKCTGCTTTACGTTTAGAAGATATGCGTATTCCTCACTCATAYTTAAAAACATTCCAAGGTCCTGCTACAGGTATYATTGTAGAACGTGAACGTTTAAAYAAATAYGGTACTCCRTTATTAGGTGCWACTGTAA…	1309
diatoms_1187	rbcL_diatoms_contig_1187	1.33	0.33	0.33	0.33	1.67	0.67	1	1.67	0	1	1.67	1	1	12	2	0	0.531939	3.51326	Kryptoperidinium foliaceum strain CCMP1326	96	2232	rbcL	ribulose-bisphosphate carboxylase large chain	Energy Metabolism	Environmental	TTACTCCTCAACCAGGTGTAGATCCAGTAGAAGCAGCAGCAGCAGTAGCTGGTGAATCTTCTACAGCAACTTGGACAGTTGTATGGACTGATTTATTAACAGCTTGTGACCGTTACCGTGCAAAAGCTTACCGTGTAGATCCAGTTCCAAGTACACCTGACCAATACTTCGCWTTTATCGCATACGAATGTGATTTATTYGAAGAAGGTTCWTTAGCTAACTTAACAGCRTCTATYATTGGTAACGTRTTCGGTTTYAAAGCTRTYTCWGCGTTACGTTTAGAAGATATGCGTATTCCTCACTCATACTTAAAAACATTCCAAGGTCCTGCWACAGGTATCATTGTWGAACGTGARCGTTTAAACAAATAYGGTRTTCCTTTATTAGGTGCKACAGTAA…	1309
haptophytes_339	rbcL_haptophytes_Contig_339	0.67	0	0	1	1.5	3.5	1	0.5	0.17	0.5	0	0.33	0.33	9.5	1	0	0.345586	4.5155	Chrysochromulina alifera	91	1929	rbcL	ribulose-bisphosphate carboxylase large chain	Energy Metabolism	Environmental	GTAATCCCTTACGCTAAAATGGGTTACTGGGATCCTGATTACACAATTAAGGAAACTGATATCCTTGCTCTATTCCGTTGTACTCCACAACCAGGTGTAGACCCAGTAGAAGCAGCAGCAGCACTAGCTGGTGAGTCTTCAACTGCWACATGGACWGTTGTATGGACTGACCTACTAACWGCRTGTGATCTWTACCGTGCTAAGGCATAYCGTGTAGACCCTGTACCAWSTGCWGCWGATACTTACTTCTGTTACGTWGCTTACGATATCGACCTTTTCGAGGAAGGATCTCTAGCTAACCTAACTGCATCTATTATTGGTAACATCTTCGGATTCAAGGCTGTTAAAGCTCTTCGTCTAGAAGATATGCGTTTCCCTTACGCACTTCTTAAGACTTAC…	1390
haptophytes_340	rbcL_haptophytes_Contig_340	6.2	2.2	2.6	5.2	6.4	38	8.8	0	1.6	5.6	10	6.4	5	98	1	Yes	0.140125	6.56024	Phaeocystis antarctica CCMP1374	99	2165	rbcL	ribulose-bisphosphate carboxylase large chain	Energy Metabolism	Environmental	CCGTTGTACTCCACAACCTGGAGTAGATCCAGTAGAAGCAGGTGCTGCACTAGCAGGTGAATCATCTACTGCTACTTGGACTGTTGTATGGACTGACCTTTTAACTGCGTGTGATCTATACCGTGCGAAAGCTTACCGTGTAGACCCAGTTCCAAGTACACCTGATACATACTTCGTATACGTAGCATACGATCTAGATCTATTTGAAGAAGGTTCGCTTGCTAACCTAACTGCTTCAATTATTGGTAACATYTTCGGATTCAAAGCTGTTAAAGCTCTAAGATTAGAAGATATGAGAATGCCAGTTGCACTATTAAAGACTTACCAAGGTCCTGCTTGTGGTCTAATTGTAGAGCGTGAGAGAATGGATAAGTTTGGTCGTCCTCTACTTGGTGCTAC…	1223
haptophytes_343	rbcL_haptophytes_Contig_343	8.4	8.6	3.6	16.4	9.8	90.6	10	7.2	1	3.6	14	20.4	13.2	206.8	1	Yes	0.137313	6.12746	Phaeocystis antarctica CCMP1374	97	1801	rbcL	ribulose-bisphosphate carboxylase large chain	Energy Metabolism	Environmental	ACTGCATCAATTATTGGTAACATCTTCGGTTTCAAGGCTGTAAAGGCTCTTCGTCTTGAAGATATGCGTTTCCCTGTAGCTCTACTTAAGACTTACCAAGGTCCTGCAACAGGTGTTGTTGTTGAGCGTGAGCGTATGGATAAGTTTGGTCGTCCWCTACTTGGTGCTACAGTTAAGCCTAARYTAGGTCTTTCTGGTAAGAACTATGGTCGTGTAGTATTCGAAGGTCTTAAAGGTGGTCTTGATTTCCTTAAGGATGATGAGAACATTAACTCACAACCATTCATGCGTTACAGAGAGCGTTTCCTTTACTCAATGGAAGGTGTTAACCACGCTGCTGCAACAAGTGGTGAAATTAAAGGTCACTACCTGAACTCTACTGCTGCTACTATGGAAGAT…	1082
haptophytes_351	rbcL_haptophytes_Contig_351	0.83	0.17	0.33	0.5	1.5	4.83	2	0.33	0.17	0.5	0.5	1.67	0.33	13.66	1	0	0.136083	6.32697	Chrysochromulina sp. CCMP291	91	1119	rbcL	ribulose-bisphosphate carboxylase large chain	Energy Metabolism	Environmental	TAACAGCATCTATCATTGGTAACATTTTCGGTTTCAAGGCTGTTAAAGCTCTTCGTCTAGAAGATATGCGTTTCCCTTACGCACTTCTTAAGACTTACCAAGGTCCTGCAACTGGTGTTGTTGTAGAGCGTGAGCGTATGGATAAGTTCGGTCGTCCACTTCTAGGTGCTACTGTAAAGCCTAAGCTAGGTCTTTCTGGTAAGAACTACGGTCGTGTAGTATTCGAAGGTCTTAAAGGTGGTCTAGATTTCCTTAAGGATGATGAGAACATTAACTCACAGCCATTCATGCGTTACAGAGAGCGTTTCCTTTACTCAATGGAAGGTGTTAACCACGCTGCTTGTCTAACAGGTGAAGTTAAGGGTCACTACCTAAACGCWACTGCTGCAACTATGGAAG…	784
haptophytes_353	rbcL_haptophytes_Contig_353	3	0	0	1.5	1.17	8.33	0.67	0.5	0	0	1.67	3.17	0.83	20.84	1	0	0.1128	6.96114	Chrysochromulina parva	90	1101	rbcL	ribulose-bisphosphate carboxylase large chain	Energy Metabolism	Environmental	ACTGCGTCTATTATTGGTAACATTTTCGGTTTCAAAGCCGTTAAAGCTCTTCGTCTAGAAGATATGCGTTTCCCTTACGCAATGCTTAAAACTTTCCAAGGTCCAGCTACTGGTCTGATCGTAGAGCGTGAGCGTATGGATAAGTTTGGTCGTCCACTTCTAGGTGCTACAGTTAAGCCTAAGCTAGGTCTTTCTGGTAAGAACTATGGTCGTGTAGTATTCGAAGGTCTTAAAGGTGGTCTAGATTTCCTTAAGGATGATGAGAACATTAACTCACAGCCRTTYATGCGTTACMGWGAGCGTTTCCTTTACTCAATGGAAGGTGTTAACCACGCTGCTTGTCTAACAGGTGAAGTTAAAGGTCACTACCTAAACKCWACTGCTKCTACTATGGAAGAT…	788
haptophytes_356	rbcL_haptophytes_Contig_356	2	1.75	0.75	5	4.75	20	2.25	3.5	0.75	1	6.25	3.75	4.75	56.5	1	Yes	0.137429	6.22291	Uncultured haptophyte clone 994EH2	98	1066	rbcL	ribulose-bisphosphate carboxylase large chain	Energy Metabolism	Environmental	AACTACGGTCGTGTAGTATTCGAAGGTCTTAAAGGTGGTCTTGACTTCCTTAAGGATGATGAGAACATTAACTCTCAGCCATTCATGCGTTACAGAGAGCGTTTCCTTTACTCAATGGAAGGTGTTAACCATGCAGCTGCACTAAGTGGTGAAGTTAAAGGTCACTACCTAAACGCTACTGCTTCTACTATGGAAGATATGTAYGAGCGTGCTGATTTCGCTGTACARCTAGGTTCAGTTATYGTTATGATTGACCTTGTAATTGGTTATACTGCAATCCAAACAATGGGTAAGCAYGCACGTGATAACGATATYCTTCTTCACCTTCACCGTGCCGGTAACTCGACTTACTCACGTCAGAAGAACCACGGTATGAACTTCCGTGTAATCTGTAAGTGG…	668
haptophytes_358	rbcL_haptophytes_Contig_358	3.5	1.33	1.33	2.17	2.83	13.83	4.33	1.67	0.83	1.17	5.67	2.17	2.83	43.66	1	Yes	0.1159	6.53419	Emiliania huxleyi CCMP1516	93	982	rbcL	ribulose-bisphosphate carboxylase large chain	Energy Metabolism	Environmental	ACTGCTTCRATTATTGGTAACATCTTCGGATTCAAAGCTGTTAAAGCTCTAAGATTAGAAGATATGAGAATGCCAGTTGCACTATTAAAGACTTACCAAGGTCCTGCTTGTGGTCTAATTGTAGAGCGTGAGAGAATGGATAAGTTTGGTCGTCCTCTACTTGGTGCTACAGTTAAGCCTAAGCTAGGTCTTTCTGGTAAGAACTATGGTCGTGTAGTATTCGAAGGTCTWAAAGGTGGTCTWGACTTCCTTAAGGATGATGAGAACATTAACTCACAGCCATTCATGCGTTACCGTGAGCGTTTCCTTTACTCAATGGAAGGTGTTAACCATGCGGCTTGTCTAACTGGTGAAGTTAAAGGTCACTACCTTAACACAACTGCGGCAACAATGGAAGAT…	659
haptophytes_362	rbcL_haptophytes_Contig_362	1.83	2.17	0.5	5.33	5.67	22.17	1.17	0.5	0.17	1.33	5.67	4.17	8	58.68	1	Yes	0.125333	6.55463	Phaeocystis antarctica CCMP1374	91	845	rbcL	ribulose-bisphosphate carboxylase large chain	Energy Metabolism	Environmental	ACAGCTTCTATTATTGGTAATGTATTCGGGTTTAAAGCTGTTAAAGCTTTACGTTTAGAAGATATGCGTCTTCCTTATGCTTACTTAAAAACTTTTTTAGGTCCAGCTTCAGGTGTTATTGTAGAACGCGAAAGACTTGATGTATTTGGACGTCCGTTATTAGGTGCAACCGTTAAACCAAAATTAGGTCTTTCTGGTAAGAACTATGGTCGTGTAGTATTCGAAGGTCTTAAAGGTGGTCTTGATTTCCTTAAGGATGATGAGAACATTAACTCACAACCGTTCATGCGTTACAGAGAGCGTTTCCTTTACTCAATGGAAGGTGTTAACCACGCTGCTGCAACAAGTGGTGAAATTAAAGGTCACTACCTGAACTCTACTGGTGCTACTATGGAAGAT…	596
haptophytes_365	rbcL_haptophytes_Contig_365	0.17	0	0	0.17	0.5	2.17	0	0.5	0.17	0	0.5	0	0.17	4.35	0	0	NA	NA	Uncultured marine microorganism clone FormID_90 ribulose-1,5-bisphosphate carboxylase/oxygenase large subunit (rbcL) gene, partial cds	100	1066	rbcL	ribulose-bisphosphate carboxylase large chain	Energy Metabolism	Environmental	AACTCACAGCCATTCATGCGTTACAGAGAGCGTTTCCTTTACTCAATGGAAGGTGTTAACCACGCGGCTTCTCTATCTGGTGAAGTTAAAGGTCACTACCTAAACACTACTGGTGCAACTATGGAAGATATGTACGAACGTGCAAACTTCGCAGCTGAGCTAGGTTCTATCATTGTTATGATTGACCTTGTAATCGGTTACACAGCTATTCAATCAATGGCTAAGTGGTCTCGTGATAACGACGTAATTCTTCACCTTCACCGTGCAGGTAACTCAACTTACTCACGTCAGAAGAACCACGGTATGAACTTCCGTGTAATCTGTAAGTGGATGCGTATGGCTGGTGTTGACCACATTCACGCTGGTACTGTAGTTGGTAAGCTTGAAGGTGATCCACTA…	538
haptophytes_370	rbcL_haptophytes_Contig_370	0.17	0.17	0.17	0	0.5	1.17	0.33	0	0.17	0	4.83	0	0	7.51	0	0	NA	NA	Haptophyceae gen. sp. 4DCH7	96	870	rbcL	ribulose-bisphosphate carboxylase large chain	Energy Metabolism	Environmental	TCACARCCATTCATGCGTTACCGTGAGCGTTTCCTATAYTCAATTGAAGGTGTTAACCACGCKGCTGCACTAASTGGKGAAGTTAAGGGTCACTACCTAAACGCTACWGCTGCAACTATGGAAGACATGTATGAGCGTTCAGATTTCTGTGCTYMAATTGGTTCAATYATTGTAATGATTGACCTTGTAATCGGTTACACAGCAATCCARWCAATGGCTTACTGGTCACGTAAGAAYGATGTAATTTTACACCTTCACCGTGCAGGTAACTCAACTTACTCTCGTCARAAGAACCACGGTATGAACTTCCGTGTAATYTGTAAGTGGATGCGTATGGCTGGTGTAGACCACATTCACGCAGGTACTGTAGTAGGTAAGCTTGAAGGTGATCCTYTAAYG…	515
haptophytes_379	rbcL_haptophytes_Contig_379	4.67	2.5	1.17	3.33	7.5	24.33	4.83	3.33	0.5	0.67	3.33	3.17	4.83	64.16	1	Yes	0.126462	6.32261	Uncultured haptophyte clone 994BH15 gb|KF961953.1|	95	861	rbcL	ribulose-bisphosphate carboxylase large chain	Energy Metabolism	Environmental	ACAGCCRTTCATGCGTTACAGAGAGCGTTTCCTTTACTCAATGGAAGGTGTTAACCACGCTGCTTGTCTAACAGGTGARGTTAARGGTCACTACCTAAACACWACWGGTGCKACTATGGAAGATATGTACGAGCGTGCAGATTTCGCTGYAGAGCTWGGTTCARTTRTTGTWATGATTGACCTTGTAATCGGTTAYACAGCTATCCAGTCAATGTCTTACTGGGCTCGTAAGAACGATKKWCTTCTTCACCTTCACCGWGCKGGTAACTCAACTTACTCTCGTCAGAAGAACCACGGTATGAACTTCCGTGTAATCTGTAAGTGGATGCGTATGGCYGGTGTWGACCACATTCACGCWGGTACWGTAGTAGGTAAGCTAGAGGGTGACCCTCTAATGAT…	513
haptophytes_380	rbcL_haptophytes_Contig_380	0.5	0.25	0	1.25	2	8.25	1	0	0.5	0.75	1	2.25	2.25	20	1	Yes	0.104571	6.82515	Phaeocystis cordata RCC1383	99	919	rbcL	ribulose-bisphosphate carboxylase large chain	Energy Metabolism	Environmental	CAGCCATTCATGCGTTACAGAGAGCGTTTCCTTTATTCAATGGAAGGTGTTAACCACGCAGCTGCAATGTCTGGTGAAGTTAAGGGTCACTACCTAAACACTACTGGTGCAACTATGGAAGATATGTACGAACGTGCTAACTTCGCTGTTGAACTAGGTTCAGTTATTGTAATGATTGACCTTGTAATTGGTTACACTGCAATCCAATCAATGGCTAAATGGTCTCGTGATGTTGATTGTATCCTTCACTTACACCGTGCTGGTAACTCGACTTACTCACGTCAGAAGAACCACGGTATGAACTTCCGTGTAATCTGTAAGTGGATGCGTATGGCTGGTGTGGATCACATCCACGCAGGTACTGTAGTTGGTAAGCTAGAAGGTGATCCTCTAATGATT…	512
haptophytes_386	rbcL_haptophytes_Contig_386	1	0	0	0.5	1.5	7.5	1	3	0.5	0	1	3	3.5	22.5	1	0	0.139611	6.02191	Chrysochromulina sp. CCMP291	93	762	rbcL	ribulose-bisphosphate carboxylase large chain	Energy Metabolism	Environmental	CAACCATTCATGCGTTACAGAGAGCGTTTCCTTTACTCAATGGAAGGTGTTAACCACGCAGCCGCTATGACTGGTGAGGTTAAGGGTCACTACCTAAACGCTACTGCAGCTACTATGGAAGATATGTACGAGCGTGCTAACTTCTGTAAAGATCTAGGTTCTATCATTGTTATGATTGACCTTGTAATCGGTTACACAGCTATTCAATCAATGGCTAAGTGGTCTCGTAGGTACGATATGATTCTTCACCTTCACCGTGCAGGTAACTCAACTTACTCACGTCAGAAGAATCACGGTATGAACTTCCGTGTTATCTGTAAGTGGATGCGTATGTCTGGTGTAGACCACATTCACGCAGGTACTGTAGTAGGTAAGCTTGAAGGTGATCCTCTAATGATT…	512
haptophytes_388	rbcL_haptophytes_Contig_388	0.4	0.2	0	1	1.8	1.8	0.8	0.4	0.4	0.2	2	0.6	0.4	10	3	Yes	0.1294	6.21734	Uncultured microorganism clone E705D26 gb|KF962018.1|	99	910	rbcL	ribulose-bisphosphate carboxylase large chain	Energy Metabolism	Environmental	GCCATTCATGCGTTACAGAGAGCGTTTCCTTTACTCAATGGAAGGTGTTAACCACGCTGCTGCAATGTCAGGTGAAGTTAAGGGTCACTACCTAAACGCTACTGSTGCWACAATGGAAGATATGTAYGAGCGTGCAGATTTCTGTAAAGAGCTTGGTTCAATTATTGTAATGATTGACCTTGTAATCGGTTACACTGCAATTCAAACAATGGGTAAGTGGTCTCGTCAGAACGATGTTATCCTTCACCTWCACCGTGCAGGTAACTCAACTTACTCACGTCAGAAGAACCACGGTATGAACTTCCGTGTAATCTGTAAGTGGATGCGTATGGCTGGTGTTGACCACATTCACGCAGGTACTGTAGTAGGTAAGCTAGAAGGTGATCCTCTAATGATTAA…	510
haptophytes_391	rbcL_haptophytes_Contig_391	1.6	0.6	0.8	1	4.2	9.6	1.8	0.6	0	0.2	2.4	2.6	1.2	26.6	1	Yes	0.152667	7.06398	Phaeocystis antarctica CCMP1374	94	792	rbcL	ribulose-bisphosphate carboxylase large chain	Energy Metabolism	Environmental	GTAGAGCGTGAGAGAATGGATAAGTTTGGTCGTCCTCTACTTGGTGCTACAGTTAAGCCTAAGCTAGGTCTTTCTGGTAAGAACTATGGTCGTGTAGTATTCGAAGGTCTTAAAGGTGGTCTTGATTTCCTTAAGGATGATGAGAACATTAACTCACAACCATTCATGCGTTACAGAGAGCGTTTCCTTTACTCRATGGAAGGTGTTAACCACGCTGCTGCAACAAGTGGTGAAATTAAAGGTCACTACCTRAACTCTACTGCTGCTACTATGGAAGATATGTATGARCGTGCTGAATTTGCTGTTGAGCTAGGTYMRKTWWTKKAATGATTGACCTTGTAATCGGTTAYACTGCAATYCAATCAATGGMYWAAGTGGTGTCGTAAAGTTGATTGTATC…	510
haptophytes_408	rbcL_haptophytes_Contig_408	0	0	0	1	0	0	1	2.17	1	0	0	2	0	7.17	4	0	0.727216	2.35744	Teleaulax amphioxeia strain HACCP-CR01	94	740	rbcL	ribulose-bisphosphate carboxylase large chain	Energy Metabolism	Environmental	ATCAGACACGGCAGCTATCGCTGGTGAATCTTCTACTGCTACATGGACTGTTGTATGGACAGACCTTCTAACAGCTTGTGACCTTTACAGAGCAAAGGCTTACAGAGTTGACCCAGTTCCAGGTGCAGCTGATCAATATTTCGCTTACATCGCTTACGAATTAGATCTATTCGAAGAAGGATCTCTTTCTAACCTAACAGCTTCTATTATCGGTAACGTATTCGGTTTCAAAGCCGTTAACGCTTTACGTCTAGAAGATATGCGTATGCCAGTTGCATATCTTAAGACTTACCAAGGTCCTGCAACAGGTGTAATTGTAGAGCGTGAGAGACTAGACAAGTTCGGTCGTCCTCTACTTGGTGCTACTGTTAAGCCTAAGCTAGGTCTTTCTGGAAAGAA…	498
haptophytes_417	rbcL_haptophytes_Contig_417	1	1	0.5	4.17	2	5.5	0	1.5	0	1	5	2	1	24.67	3	Yes	0.138941	6.07247	Teleaulax amphioxeia strain HACCP-CR01	100	823	rbcL	ribulose-bisphosphate carboxylase large chain	Energy Metabolism	Environmental	TGTTGTATGGACAGACCTTCTAACAGCTTGTGATCTTTACAGAGCTAAAGCTTACAGAGTTGACCCTGTTCCAGGTGCACAAGACCAATACTTCGCATACATCGCTTACGAGCTAGACCTATTCGAAGAAGGTTCTCTTTCTAACCTAACAGCTTCTATCATCGGTAACGTATTCGGTTTCAAGGCCGTTAATGCTCTACGTTTAGAAGATATGCGTATGCCAGTTGCATACCTTAAGACTTACCAAGGTCCTGCTACAGGTGTAATTGTAGAGCGTGAGAGACTAGACAAGTTCGGTCGTCCTCTACTAGGTGCTACTGTTAAGCCTAAGTTAGGTCTTTCTGGTAAGAACTACGGTCGTGTAGTTTACGAAGGTCTTAAAGGTGGTCTAGACTTCCT…	456
haptophytes_428	rbcL_haptophytes_Contig_428	0.17	1	0	0.33	0	1.33	0.17	0.5	0	0.17	0.5	0.67	1	5.84	0	0	NA	NA	Teleaulax amphioxeia strain HACCP-CR01	94	592	rbcL	ribulose-bisphosphate carboxylase large chain	Energy Metabolism	Environmental	ATTAGCCTAACTCAAGGTCTATTCTTCGCACAAGATTGGGCTGCTCTTAACAAGTGTCTACCTGTAGCTTCAGGTGGTATTCACTGTGGTCAAATGCACCAACTAATTCACTACCTAGGTGATGATGTTGTACTTCAATTCGGTGGTGGTACTATTGGTCACCCTGATGGTATTCAAGCTGGTGCGACTGCTAACCGTGTAGCTCTTGAGAGTATGGTTGTAGCTCGTAACGAAGGACGCGATTACCTTTCAGAAGGTCCTGGTATCCTTAAGAATGCAGCTAAGAGCTGTGGTCCTCTTCAAACAGCTCTGATCTATGGAAGGATATTACATTCAACTATGCTTCTACAGATACAGCTGACTTCGTTGAAACAGCTACATCTAACAGATAA	392
haptophytes_436	rbcL_haptophytes_436	0.83	0.67	0.5	4.33	2	6.5	0.5	1.17	0	0.67	4	1.83	0.83	23.83	3	Yes	0.119455	6.46001	Teleaulax amphioxeia strain HACCP-CR01	99	1577	rbcL	ribulose-bisphosphate carboxylase large chain	Energy Metabolism	Environmental	AATCTTGAKCARASAMKAGACCTTGAGGTAGGTTAATCTCTGATTGAGTTGCAAGAAGAGTTGTGTAGAAACCTTTAACCATTARAGGGTCACCTTCAAGCTTACCTACAACAGTACCAGCGTGAATGTGGTCAACACCAGCCATACGCATCCACTTACAGATTACACGGAAGTTCATACCGTGAGTCTTTTGACGTGCATATGTAGAGTTACCTGCACGGTGTAAGTGAAGAATCATACTGTTCTGACGAGACCACTTAGCAATACTTTGGATAGCTGTGTAACCCATTACAAGGTCGATCATGATGATCACAGATCCTAGTTCCTTACCGAATTCAGCACGCTCGTAAACGTCTTCCATTGTACCAGCAGTTACGTTGAAGTAGTGACCTTTAATTT…	890
haptophytes_840	rbcL_haptophytes_contig_840	2	1	1.5	6.33	6.33	9.33	0	3	0	1	8.33	0	2	40.82	3	Yes	0.26619	5.27157	Teleaulax amphioxeia strain HACCP-CR01	99	1602	rbcL	ribulose-bisphosphate carboxylase large chain	Energy Metabolism	Environmental	ACCTGGAACAGGGTCAACTCTGTAAGCTTTAGCTCTGTAAAGATCACAAGCTGTTAGAAGGTCTTAAAGGTGGTCTAGACTTCCTTAAGGATGACGAGAACATTAACTCTCAACCATTCATGAGATGGAGAGAGCGTTTCTTATTCGGTATGGAAGGTGTTAACCGTGCATCTGCAGCTACGGGTGAAATTAAAGGTCACTACTTCAACGTAACTGCTGGTACAATGGAAGACGTTTACGAGCGTGCTGAATTCGGTAAGGAACTAGGATCTGTGATCATCATGATCGACCTTGTAATGGGTTACACAGCTATCCAAAGTATTGCTAAGTGGTCTCGTCAGAACAGTATGATTCTTCACTTACACCGTGCAGGTAACTCTACATATGCACGTCAAAAGA…	897
haptophytes_853	rbcL_haptophytes_contig_853	0	0	0.2	0.6	0.2	3.2	1	0.6	0.2	0	0.8	1.6	0.2	8.6	0	0	NA	NA	Emiliania huxleyi/Chrysochromulina alifera	92	1016	rbcL	ribulose-bisphosphate carboxylase large chain	Energy Metabolism	Environmental	TAAAGGCTCTTCGTCTTGAAGATATGCGTTTCCCTGTAGCTCTACTTAAGACTTACCAAGGTCCTGCAACAGGTGTTGTTGTTGAGCGTGAGCGTATGGATAAGTTCGGTCGTCCACTTCTAGGTGCAACAGTTAAGCCTAAGCTAGGTCTTTCTGGTAAGAACTATGGTCGTGTAGTATTCGAAGGTCTAAAAGGTGGTCTAGACTTCCTTAAGGATGATGAGAACATTAACTCACAGCCATTCATGCGTTACCGTGAGCGTTTCCTATACTCAATGGAAGGTGTTAACCACGCAGCTGCTTTATCTGGTGAAGTTAAAGGTCACTACCTAAACACTACTGCTAGCACAATGGAAGATATGTACGAGCGTGCAGACTTCGCTGCTGAGCTAGGTTCTA…	697
haptophytes_905	rbcL_haptophytes_contig_905	0.4	0	0	0.2	0.6	3.4	0.4	0	0	0.4	0.2	0.6	0	6.2	0	0	NA	NA	Chrysochromulina sp. CCMP291	90	756	rbcL	ribulose-bisphosphate carboxylase large chain	Energy Metabolism	Environmental	TTCATGTCTCAAGCTGTAGAATCACGTACTCGWATYAAAAGTGAACGTTACGAATCAGGTGTAATCCCWTAYGCAAAAATGGGTTACTGGGATCCTGATTACRCAATCAAGGAAACAGATATTCTAGCTCTATTCCGTTGTACTCCACAACCAGGTGTAGAYCCWGTAGAAGCAGCAGCAGCACTAGCTGGTGAGTCTTCAACWGCWACATGGACWGTTGTATGGACRGAYCTAYTAACTGCATGTGACCTATACCGTGCRAAAGCATACCGTGTAGACCCTGTACCAAGTGCAGCWGATACTTACTTCTGTTACRTYGCTTACGATATCGAYCTTTTCGAGGAAGGATCTYTAGCTAACCTAACAGCWTCWATTATTGGTAACATCTTSGGTTTCAAG…	538
haptophytes_907	rbcL_haptophytes_contig_907	0.2	0	0	0.2	2	2.6	0.4	0.4	0.2	0.2	0.2	1	0.2	7.6	0	0	NA	NA	Chrysochromulina alifera	91	1142	rbcL	ribulose-bisphosphate carboxylase large chain	Energy Metabolism	Environmental	ATCGCTTACGATATCGACCTTTTCGAGGAAGGATCTCTAGCTAACCTAACAGCATCTATCATTGGTAACATTTTCGGTTTCAAGGCTGTTAAAGCTCTTCGTCTAGAAGATATGCGTTTCCCTTACGCACTTCTTAAGACTTACCAAGGTCCTGCAACTGGTGTTGTTGTAGAGCGTGAGCGTATGGATAAGTTCGGTCGTCCACTTCTAGGTGCTACTGTAAAGCCTAAGCTAGGTCTTTCTGGTAAGAACTACGGTCGTGTAGTATTCGAAGGTCTTAAAGGTGGTCTAGATTTCCTTAAGGATGATGAGAACATTAACTCACAGCCATTCATGCGTTACAGAGAGCGTTTCCTTTACTCAATGGAAGGTGTTAACCACGCTGCTTGTCTAACAGGT…	822
haptophytes_919	rbcL_haptophytes_contig_919	2.4	0.2	0	0.8	2.4	13.2	2.8	0.8	1	0.6	2	2	3.2	31.4	1	Yes	0.0978333	6.94439	Chrysochromulina hirta	92	996	rbcL	ribulose-bisphosphate carboxylase large chain	Energy Metabolism	Environmental	TCAATCATCGTAATGATYGACCTTGTAATCGGTTATACTGCAATCCAAWCAATGGGTWASTGGKCTCGTSMGAACGATGTTMTYCTTCACTTACACCGTGCAGGTAACTCAACTTAYTCACGTCAGAAGAACCACGGTATGAACTTCCGTGTAATCTGTAAGTGGATGCGTATGGCTGGTGTTGACCACATTCACGCAGGTACTGTAGTAGGTAAGCTAGAAGGTGATCCTCTAATGATTAAAGGTTTCTACAACACTCTTCTTGACTTTAAGAGTGATGTAAACCTACCTGAAGGTCTATTCTTCGCACAAGATTGGGCATCTCTACGTAAGTGTGTACCAGTATCTTCTGGTGGTATCCACTGTGGTCAAATGCACCAACTAATTAACTACCTTGGT…	672
stramenopiles_1263	rbcL_stramenopiles_other_contig_1263	3.4	3.4	3.6	33	7.4	96.4	12.8	11	3	2	10.6	3.4	16.2	206.2	1	Yes	0.538171	3.36004	Pelagomonas calceolata strain CCMP1756	98	1530	rbcL	ribulose-bisphosphate carboxylase large chain	Energy Metabolism	Environmental	GGTAAGAACTACGGTCGTGTAGTATTTAGAAGGTTTAAAAGGTGGTTTAGACTTACTTAAAGGATGATGAGAACATTAACTCACAACCATTTATGCGTTGGAGAGAGCGTTTCTTATACTGTATCGAAGGTATCAACCGTGCTGCTGCAGCTACTGGTGAAGTTAAGGGTTCTTACTTAAACATAACTGCTGGTAACAACGATGAGTTAATGAATCGTGGTGAATTCGCTAAAGAGTTAGGTTCAGTAATTGTAATGATTGAYTTAGTAATCGGTTACACTGCTATCCAAACTGCTGCAATCTGGGCTCGTGCTAACCACATGATCTTACACTTACACCGTGCTGGTAACTCAACTTACGCACGTCAAAAGAACCACGGTATCAACTTCCGTGTAATYT…	886
stramenopiles_802	rbcL_stramenopiles_other_contig_802	0	0	0	0.4	0.4	2.2	0.6	0.8	0.6	0.4	0	0.8	0.4	6.6	0	0	NA	NA	Dictyocha speculum	98	2358	rbcL	ribulose-bisphosphate carboxylase large chain	Energy Metabolism	Environmental	TACATGTCTCAATCTGTATCAGAACGTACACGAATTAAAAGCGAGCGTTATGAATCCGGAGTAATCCCTTATGCAAAGATGGGTTACTGGGATGCTGCATATTCGGTAAAACAGACTGACCTACTTGCTTTATTCCGTATCACACCACAACAAGGTGTAGATCCGGTTGAAGCAACAGCAGCCGTAGCTGGTGAATCATCAACTGCTACTTGGACTGTTGTATGGACAGATCTTTTAACAGCATGTGATGTTTATCGTGCTAAAGCTTATCGTGTCGATCCTGTACCTAATACACCGGGACAGTATTTTGGTTATGTTGCGTATGAAGTTGATCTTTTCGAAGAAGGATCACTTGCCAATATGACAGCGTCTATTATTGGTAACGTTTTCGGTTTCAAA…	1470
stramenopiles_806	rbcL_stramenopiles_other_contig_806	0.2	0.6	0	1.2	0.6	3.6	0.2	0.2	0	0.2	0.8	1.2	0.6	9.4	0	0	NA	NA	Aureococcus anophagefferens strain CCMP 1984	85	955	rbcL	ribulose-bisphosphate carboxylase large chain	Energy Metabolism	Environmental	ATTGGTAACGTATTTGGTTTTAAGGCTCTTAAAGCTCTTCGTTTAGAAGATATGCGTGTTCCTTACGCGTACTTAAGAACTTTCCAAGGTCCAGCTACAGGTGTTATTGTAGAGCGTGAGCGTATGGATAAATTCGGTAAGCCTCTTTTAGGTGCAACTGTTAAGCCTAAGTTAGGTTTATCTGGTAAGAACTACGGTCGTGTAGTATTCGAAGGTCTTAAGGGTGGTCTTGACTTCCTTAAAGATGATGAGAATATTAACTCTCAAGCATTCATGCGTTGGAGAGAGCGTTTCCTTTACGTAATTGAAGGTATCAACCGTGCGGTTGCTACTTCTGGTGAAGTTAAAGGTTCATACCTTAACGTAACTGCTGGTACTATGGAAGACGTTTACGAACGT…	832
stramenopiles_808	rbcL_stramenopiles_other_contig_808	14.83	2.5	4.67	24.17	12.5	133.33	22	19.5	4.17	1.5	7	11.67	13.67	271.51	1	Yes	0.326071	4.65213	Pelagomonas calceolata	96	1918	rbcL	ribulose-bisphosphate carboxylase large chain	Energy Metabolism	Environmental	TATATGTCTCAAAACGTATCTGAACGTACAAGAATTAAAAGTGAACGTTACGAATCTGGTGTAATCCCTTACGCTAAAATGGGTTACTGGGATGCTAACTACGCAGTTAAAGCAACTGATTTATTAGCATTATTCCGTATCACTCCACAACCAGGTGTTGACCCAGTTGAAGCTGCTGCTGCAGTTGCTGGTGAGTCTTCTACTGCAACATGGACTGTTGTATGGACAGATTTATTAACTGCTTGTGATATCTACCGTGCTAAGGCATTCCGTGTAGATCCAGTTCCAAGCGCTCCTGATCAATTCTTCGCGTACGTAGCATACGAAGGTGACTTATTCGAGGAAGGTTCATTAGCTAACATGACTGCTTCTATTATTGGTAACGTATTCGGTTTCAAA…	1200
stramenopiles_810	rbcL_stramenopiles_other_contig_810	2	2.8	3.4	10	1.8	50.6	4.4	4.8	0.6	1.2	5.8	8	2.8	98.2	1	Yes	0.408333	4.19969	Pelagococcus subviridis	98	1957	rbcL	ribulose-bisphosphate carboxylase large chain	Energy Metabolism	Environmental	GGGTTACTGGGATGCTAACTACGCAGTTAAAGCAACTGACTTATTAGCATTATTCCGTATCACTCCACAACCAGGTGTTGACCCAGTAGAAGCTGCTGCTGCGGTTGCTGGTGAGTCTTCAACTGCAACATGGACTGTTGTATGGACTGACTTATTAACTGCTTGTGATATCTACCGTGCTAAGGCATTCCGTGTAGATCCAGTTCCAAGCGCTCCTGATYRATWCKTCTCKTACGTWGCWTAYGAAGGTGACTTATTTRRGRAAGGTTCATTAGCTAACATGACTGCTTCTATTATTGGTAACGTATTCGGTTTCAAAGCTGTTAAAGCGTTACGTTTAGAAGATATGCGTATCCCACACTCATACTTAAAGACTTTCCAAGGTCCTGCTTCTGGTGT…	1126
stramenopiles_816	rbcL_stramenopiles_other_contig_816	3.17	1.67	3	26.67	5	80	10.67	10.17	1.67	1.67	8.5	4.17	11.67	168.03	1	Yes	0.523882	3.48339	Pelagomonas calceolata strain CCMP1756	97	1333	rbcL	ribulose-bisphosphate carboxylase large chain	Energy Metabolism	Environmental	AACCGTGCTGCTGCAGCGACTGGTGAAGTTAAGGGTTCTTACTTAAACATGACTGCTGGTAACAACGAYGAGWTRATKAMTCGTGGTGAATTCGCTAAAGAGTTAGGTTCAGTAATTGTAATGATTGAYTTAGTAATCGGTTACACTGCTATCCAAACTGCTGCAATCTGGGCTCGTGCTAACCACATGATCTTACACTTACACCGTGCTGGTAACTCAACTTACGCACGTCAAAAGAACCACGGTATCAACTTCCGTGTAATTTGTAAGTGGATGCGTATGGCTGGTGTTGATCACATTCACGCTGGTACAGTTGTAGGTAAGTTAGAAGGTGATCCATTAATGATCCAAGGTTTCTACGACACATTATTAAAGACTAAGTTAGCTATCGATTTACCT…	780
stramenopiles_837	rbcL_stramenopiles_other_contig_837	0.67	0.17	0.33	1	3.17	6.17	0.83	0.33	0	0.17	1.83	2	0.67	17.34	1	Yes	0.1475	7.23398	Pseudochattonella verruculosa	90	1876	rbcL	ribulose-bisphosphate carboxylase large chain	Energy Metabolism	Environmental	TTCATGTCTAACTCTGTATCAGAACGTACACGAATTAAAAGCGAACGTTACGAATCTGGTGTAATCCCTTACGCTAAGATGGGTTACTGGGATGCTACTTACACAGTAAAAACTACTGATGTTCTAGCTCTATTCCGTATTTCACCACAACCAGGGGTTGACCCTGTAGAAGCTACTGCAGCAGTAGCTGGTGAGTCTTCAACTGCAACATGGACTGTTGTATGGACTGACCTACTAACAGCTTGTGATATTTACCGTGCGAAAGCATACCGTGTTGACCCTGTTCCAAACACACCTGACCAATTCTTTGGTTACATCGCATACGAATGTGATCTTTTCGAGGAAGGTTCACTTGCAAACATTACTGCATCAATCATTGGTAACGTATTTGGTTTCAAG…	1470
stramenopiles_842	rbcL_stramenopiles_other_contig_842	2.2	0.6	1	5.2	4.2	11	1.4	1	1	0.2	1.4	1.8	1.8	32.8	1	0	0.295125	4.99324	Aureococcus anophagefferens strain CCMP 1984	90	1231	rbcL	ribulose-bisphosphate carboxylase large chain	Energy Metabolism	Environmental	CTACGGTCGTGTAGTATTCGAAGGTCTTAAGGGTGGTCTTGACTTCCTTAAGGATGACGAGAACATTAACTCACAGCCATTCATGCGTTGGCGTGAGCGTTTCCTTTACGTACAAGAAGGTATTACTCGTGCTTCTGCAGCTACTGGTGAAGTTAAAGGTTCTTACCTTAACATTACTGCTGGTACAATGGAAGAAGTTTACACTCGTGCAGAGTACGCTAAGGAACTTGGTACTGTAATCGTAATGATTGACCTTGTAATGGGTTACACAGCTATCCAATCTGCAGCTATCTGGGCTCGTGATAACGACCTAATCCTTCACTTACACCGTGCTGGTAACTCAACTTACGCACGTCAGAAGAACCACGGTATTAACTTCCGTGTTATCTGTAAGTGGAT…	905
stramenopiles_846	rbcL_stramenopiles_other_contig_846	0.67	0.5	0.83	0	1.5	3.5	0.83	1	0	1.5	2	1	0.33	13.66	2	0	0.307455	5.04603	Aureococcus anophagefferens strain CCMP 1984	99	2639	rbcL	ribulose-bisphosphate carboxylase large chain	Energy Metabolism	Environmental	AATGTCTCAATCTGTATCTGAACGTACAAGAATCAAAAGTGAMCGTTAYGAATCTGGTGTAATCCCATACGCAAAAATGGGTTACTGGGATGCTAGCTACCAAGTTAAAGCAACTGACCTTTTAGCGTTATTCCGTATCACACCACAACCAGGTGTTGACCCAGTTGAAGCAGCTGCTGCTGTTGCTGGTGAGTCTTCAACTGCGACATGGACTGTTGTATGGACTGACTTATTAACTGCTTGTGATGTATACCGTGCTAAAGCATTCCGTGTAGATCCAGTTCCTAGCGCACCTGATCAATTCTTCGCGTACATCGCATACGAAGGTGACTTATTTGAGGAAGGTTCATTAGCGAACATGACTGCTTCTATTATTGGTAACGTATTCGGTTTCAAGGC…	1468
stramenopiles_851	rbcL_stramenopiles_other_contig_851	2	0	0	0.75	2	3.5	1.75	0	1.75	0.75	0.75	7	0.75	21	2	0	0.328308	4.75071	Cymatopleura solea strain L1348	86	600	rbcL	ribulose-bisphosphate carboxylase large chain	Energy Metabolism	Environmental	TTCATGTCTCAATCTGTATCAGAACGTACTCGAATTAAGTCAGAGCGTTACGAATCTGGTGTAATCCCTTACGCTAAGATGGGTTACTGGGATGCTACTTACACAGTTAAAGATACTGATGTATTAGCTCTTTTCCGTATTACACCTCAGCCAGGTGTAGACCCTGTAGAAGCTACAGCAGCTGTAGCTGGTGAGTCTTCGACTGCAACATGGACTGTTGTATGGACTGACCTACTAACTGCTTGTGATATTTACCGTGCGAAAGCATACCGTGTAGATCCAGTACCTAACACACCTGATCAGTACTTCGGTTACATCGCTTACGAATGTGAATTATTTGAAGAAGGTTCACTTGCTAACTTAACTGCGTCTATCATTGGTAACGTATTTGGTTTCAAG…	515
stramenopiles_901	rbcL_stramenopiles_other_contig_901	0	0	0	0	0	0	1	1	0	0	1	0	0	3	0	0	NA	NA	Ochromonas sp. aestuarii	88	1025	rbcL	ribulose-bisphosphate carboxylase large chain	Energy Metabolism	Environmental	CTTCAATTATTGGTAACGTATTTGGATTCAAAGCCGTTAAAGCTTTACGTTTAGAAGATATGCGTCTTCCTTATGCTTACTTAAAAACTTTCATTGGACCTGCAGCTGGTGTAATTGTAGAACGTGAAAGATTAGATGTATTCGGACGTCCATTATTAGGTGCAACAGTTAAACCAAAATTAGGTCTTTCTGGTAAAAACTACGGTCGTGTAGTATACGAAGGGTTAAAAGGTGGTTTAGACTTCTTAAAAGATGAYGAAAACATTAACTCWCAACCATTCATGAGATGGCGTGAAAGATTCTTATACGTWATGGAAGGKATCAAYAAAGCTGCTGCTAAATCTGGTTCAGTTAAAGGTTCTTACTTAAACGTAACWGCTGSTACAATGGAAGATATGT…	804

## Sheet: SAR11.NPSG
Transcript ID	Full transcript ID	SRS593027	SRS593028	SRS593029	SRS593030	SRS593032	SRS593034	SRS593036	SRS593037	SRS593038	SRS593041	SRS593043	SRS593045	SRS593048	SRS593049	SRS593050	SRS593051	SRS593052	SRS593053	SRS593054	SRS593055	SRS593056	SRS593057	SRS593058	SRS593059	SRS593060	SRS593061	SRS593062	SRS593063	SRS593064	SRS593065	Transcription Sum	Transcription cluster	Significant cluster assignment?	False discover rate for periodicity	Fourier	Closest organism	NT identity %	Total score	Gene	Gene annotation	Pathway KEGG	Source of the target seq	Sequence	Sequence length
694958	JCVI_ORF_1105093694958	0.17	0	0.17	0	0.17	0.5	0	0.17	0.5	0.5	0	0	0.17	0.33	0.83	0	0.83	0.33	0.67	0.17	0.33	0	0	0	0.17	0	0.17	0.17	0	0.17	6.52	2	Yes	0.52	7.96	Candidatus Pelagibacter ubique HTCC1062	76	627	dmdA	dimethylsulfoniopropionate demethylase	Microbial metabolism in diverse environments	Environmental	ATAGCAAAATCAAGAAGGCTTAGAGGTACACCGTATACCTCTAGAATTGAAAAACAAGGTGTAACTGCTTATACTATATATAATCATATGTTGCTGCCAGCAGCATTTGGTTCTGTAGAGGATGCTTATCATCACTTGAAAGAGCATGTTCAGATTTGGGATGTTGCCGCTGAAAGACAAGTTGAAATTTCTGGTAAAGACTCAGCAAAATTGGTTCAATTGATGACTTGCAGAGATTTATCAAAATCCAAAGATGGAAGATGTTATTACTGCCCAATCATTGATGACAATGCAGGTTTAATTAATGATCCTGTAGTTCTAAGATTAAATGAAAATAGGTGGTGGGTGTCTTTAGCGGACTCAGATGTAATTCTATTTGCCAAAGGATTAGCGATTGGA…	870
550490	JCVI_ORF_1105103550490	0	0.5	0	0	0.5	0	0.25	0	0.5	0.5	0.75	0.25	0	0	0.25	0.5	1	0.5	0.75	0	0.25	0.75	0.75	0.5	0	0.25	1.5	0	0	0.5	10.75	2	Yes	0.58	5.55	Candidatus Pelagibacter ubique HTCC1062	75	697	dmdA	dimethylsulfoniopropionate demethylase	Microbial metabolism in diverse environments	Environmental	GTGTTCGCTTACACAATATACAATCATATGTTGCTTCCTGCTGCATTTGGTTCTTTAGAAGACTCATATCATCATTTAAAAGAGCATGTTCAAGTTTGGGATGTGGCTGCTGAAAGACAAGTAGAGATTACTGGAAAAGATGCTGCAAAATTGGTTCAACTTATGACTTGTAGAGATCTTTCGAAATCAAAAGATGGAAGATGTTATTATTGTCCAATCATAGATGATAATGCTGGATTAATTAATGATCCAGTTGTTCTAAGATTTAATGAGAATAAATGGTGGGTTTCTATTGCAGATACGGATGTAATCTTATTTGCAAAAGGATTGGCAATTGGAAATAAATTTGATGTAAATATTATCGAACCCGAAGTTGACATTATGGCTGTACAAGGGCCT…	1035
952414	JCVI_ORF_1105122952414	2	0	1	0	0	0	0	0	0	0	0	0	0	0	0	0	0	0.6	0	0	0	0	0	0	0	0	1	0	0	0.6	5.2	4	Yes	0.56	6.07	Candidatus Pelagibacter ubique HTCC1062	75	641	dmdA	dimethylsulfoniopropionate demethylase	Microbial metabolism in diverse environments	Environmental	GGTGAAGATTTCACTATATATAATCATATGTTGCTGCCAGCAGCATTTGGTTCTGTAGAAGATGCTTATCATCACTTAAAAGAGCATGTTCAGATTTGGGATGTTGCCGCTGAAAGACAAGTTGAAATTTCTGGTAAAGATTCAGCTAAATTAGTTCAATTGATGACTTGCAGAGATTTATCAAAATCTAAAGACGGAAGATGTTATTATTGCCCTATCATTGATGATAATGCAGGTTTAATTAATGATCCTGTAGTTCTAAGATTAAATGAAAATAGGTGGTGGGTCTCTTTAGCTGACTCAGATGTAATTCTATTTGCCAAAGGATTAGCGATTGGAAATAAATTTGATGTAAAGATTTCTGAACCTGATGTTGATATAATGGCAGTGCAAGGACCA…	996
815396	JCVI_READ_1093015815396	2.5	5	2	3	3.25	5.75	0.5	0.75	0.25	1	8.5	1.5	5.75	8	6.25	6.75	1.75	3.25	5.75	4.25	5	5.25	7.75	4.75	1.5	2.75	7.5	5.25	1.5	10.5	127.5	3	0	0.67	8.73	Candidatus Pelagibacter ubique HTCC1025	76	457	bop	bacteriorhodopsin	Signaling Molecules and Interaction	Environmental	TTCTATGAGAGCAATGAACATGTTAGCTTTAGTGCTAGTTTTTTCGGAGCTACTACAGCAGCTAACTCTGCAACAGCATTTTAGCTACAGATGATTTCGTAGGTATTTCATTTTGGCTAATTTCAATGGGTATGTTGGCAGCTACAGCATTTTTCTTTATGGAGCAAGCAAACGTTGGTGCTCAGTGGAGAAAATCAGTAAACGTAGCTGGATTAGTAACAGGTATTGCATTTATCCACTATATGTACATGAGAGCGGTTTGGGTTGAAACAGGTGATACTCCAACTGTTTACAGATACATCGATTGGTTAATTACTGTACCACTACAGTTAGTAGAATTTTATCTAATTCTATCTGCAGTTAAGAAAGTACCAACAGGAATATTCTGGAGAATTTTAA…	780
359043	CAM_READ_0132359043	1	0.67	2	0.67	0.33	1.33	0	0	0	2.67	1.67	0	1.33	3	1.33	1	1.33	1	3	0	1.33	0	0.67	0.67	0.33	0	1.33	0	0	0.33	26.99	3	0	0.79	3.04	Candidatus Pelagibacter ubique HTCC1061	86	327	bop	bacteriorhodopsin	Signaling Molecules and Interaction	Environmental	GGGAAGAAGACGAAGGTACTAACTAAGTTAACGCTACTACGTTTTGGTTTTAGTAAGTCCGGTATGGCTGGATGGTTCTACATTCTTTATGAAGTATTTTCTGGTGAAGCAGGAAAAGCTGCAGCAAAAAGTGGTAACAAAGCTCTTGTTACTGCATTTGGTGCAATGAGAATGATTATTACAGTAGGTTGGGCTATTTACCCATTAGGTTACGTATTTGGTTACCTAACAGGTGGAGTTGACGCTAACACACTTAACGTTGTTTATAACGTTGCTGACTTCTTAAACAAAATTGCATTTGGTCTAGTAATTTGGGCTGCAGCTACGCAATCTAGTGGAAGAAAAGCTAAGTAATTAGTAACAC	364
684666	JCVI_READ_684666	1	0.5	0	0.5	0	0	0	0	1	1	0	0.5	0.5	1	0	0	0	0.5	0.5	0	0.5	0.5	0.5	0	0	0	0	0	0	0.5	9	4	Yes	0.57	5.82	Candidatus Pelagibacter ubique HTCC7211	67	63	bop	bacteriorhodopsin	Signaling Molecules and Interaction	Environmental	GCGGTGGAATGAGTCTCCTCTCTTGAAGTTGTTGGAAAAGTTACTTCTTCTGTATTCTGGCAATTATTAACAGCATCAGTTGTTATGTTAGTTGGTGGACTACTTGGAGAAACAGTTGATGGCTTCGAATTAATAGGTTTCATTATTGGAATGTTAGGTTGGGCTTACGTTGTATTCTTAATATTTGCTGGAGGTGCTGCTAAGGCAAGCGCTGAAAGTAAGAATGCAGCTGTAACATCAGCTTTCAATTCAATGAAGCTAATTGTGCTAGTTGGTTGGGCAATTTACCCAATTGGATACATAATTGGTAATTTAGTAACAGTTACTGATGGTATTCAGATTATGAATATTGTTTACAACTTTGCAGACTTGATTAACAAAGCCGCTTTTGGTCTTGTT…	451
878403	JCVI_READ_1092963878403	0	0	0	0	0	0.75	0	0	0	0	0	0	0	0.75	0	0.75	0	0	0.75	0.75	0	0.25	0.75	0	0.75	0	1.5	0.75	1	0.75	9.5	5	0	0.98	0.73	Candidatus Pelagibacter ubique HTCC7211	90	506	bop	bacteriorhodopsin	Signaling Molecules and Interaction	Environmental	GACGGGTCTGAGCATTCATACACTACATGTATATGAGAGAAGTATGGGTGTCTACTGGTGACTCGCCAACAGTTTACAGATATATCGACTGGTTGATTACTGTGCCACTACAAATGGTTGAATTCTATTTAATTCTATCTGCTGTAGGTAAAGCAAATTCAGGAATGTTCTGGAGATTGCTATTAGGTTCATTAGTAATGTTAATTGGTGGATACTTAGGTGAAGCTGGTTATATTAATGCAACACTTGGATTTATAGTTGGAATGGCAGGTTGGATATACATTCTATATGAAGTATTTTCAGGTGAGGCTGGTAAAGCTGCAGCTAAAAGTGGAAACAAGTCTCTTGTAACTGCTTTTGGTGCAATGAGAATGATTGTTACAGTAGGTTGGGCAATTT…	564
559607	JCVI_READ_1093015559607	5.5	1	4.5	5.75	2.75	4.75	0.75	0	0.25	0.5	8.75	3.75	2.75	5.25	6.25	5.25	3	2.25	4.75	5	7.25	3.25	5.5	4.25	0.75	1	8.75	3	4.5	10.75	121.75	3	0	0.23	11.27	Candidatus Pelagibacter ubique HTCC1062	80	538	bop	bacteriorhodopsin	Signaling Molecules and Interaction	Environmental	GGGGCCCTTTAAAACAAGCACGTCGCATCAGGCTGGAGAACATCAGTAATTGTTGCTGGTCTAGTAACTGGTATTGCTTTCATTCACTACATGTACATGAGAGAAGTATGGGTAAGCACAGGTGATTCACCTACTGTTTACAGATACATTGACTGGTTAATCACTGTACCATTACAGATGGTAGAATTTTACTTAATTCTAGCAGCTATTGGTAAAGCAAACTCAGGCATGTTCTGGAGATTATTAATTGGTTCAGTTGTTATGCTAGTTGGTGGATACTTAGGTGAAGCAGGATATATTAATGCTACACTTGGTTTCATCATTGGTATGGCAGGTTGGGTATACATTCTTTATGAAGTATTCTCAGGTGAAGCTGGAAAAGCTGCAGCAAAAAGTGGA…	627
308936	JCVI_READ_1108829308936	2	1.67	1.67	2.33	1	1.67	1	1.33	1.33	3.33	2	1.33	3.33	6	3.33	1.33	3	1.67	3.33	5	8.33	4.67	3.67	7.67	0.67	2	4.33	4	3	7	92.99	5	0	0.54	7.3	Candidatus Pelagibacter ubique HTCC8049	89	345	bop	bacteriorhodopsin	Signaling Molecules and Interaction	Environmental	TTATGAAAAAACTTAAATTGTTTGCTCTTACAGTTGTAGCCCTATTAGGTGTTACAGGTGTAGCAAACGCAGATGCCATGTTAGCTCAAGATGATTTCGTAGGAATTTCATTCTGGGTTATATCTATGGGGATGTTAGCAGCTACTGCTTTCTTCTTTATGGAAACTGGTAACGTTGCAGCAGGCTGGAGAACTTCAGTTATTGTTGCTGGTCTAGTAACAGGTATTGCATTCATACACTACATGTATATGAGAGAAGTGTGGGTGACTACAGGTGACTCGCCAACAGTTTACAGATATATTGACTGGTTAATTAACTGCCGTCAGACTCCAAAAAAA	338
468497	CAM_READ_0192468497	2.5	4.5	5	3.5	3.5	7.5	1	1	1.5	5	12.5	2.5	4	12.5	13.5	5	4.5	4	11	3.5	6	6.5	6.5	5.5	1	1.5	6	6.5	2.5	5.5	155.5	3	0	0.59	6.35	Candidatus Pelagibacter ubique HTCC1062	83	500	bop	bacteriorhodopsin	Signaling Molecules and Interaction	Environmental	ATCAACTGGTGACTCACCAACTGTTTACAGATATATTGACTGGTTAATCACTGTACCATTACAAATGGTAGAATTTTATTTAATTCTATCAGCTGTAGGAAAAGCAAATTCTGGAATGTTCTGGAGATTGTTAATTGGTTCAGTTGTAATGCTAGTTGGAGGATATTTAGGAGAAGCAGGTTACATCAATTCTATGCTTGGTTTTATTATCGGTATGGCTGGATGGATCTATATTCTTTATGAAATATTTTCAGGAGAAGCTGGAAAAGCAGCAGCAAAAAGTGGAAACAAAGCTCTTGTAACTGCATTTGGTGCTATGAGAATGATCGTTACAGTAGGTTGGGCAATTTACCCATTAGGTTACGTATTTGGTTACCTAACAGGTGGTGTGGATTCTAA…	495
675785	CAM_READ_0163675785	2	1	1	1	1.5	1.5	0	0	0.5	1	4	0.5	0.5	1.5	2.5	1	2	0	0.5	0	1	1	1	0.5	0	0	0.5	0	0	0.5	26.5	3	0	0.6	5.28	Candidatus Pelagibacter ubique HTCC7214	83	422	bop	bacteriorhodopsin	Signaling Molecules and Interaction	Environmental	AATTCTAGCAGCTGTGGGAAAAGCAAATTCTGGAATATTCTGGAGATTGTTACTTGGTACAGTAGTAATGCTTGTCGGTGGATACTTAGGAGAAGCAGGTTACCTAGGCGAAGGTAGTGGTAAAATGCTTGGTTTCATAATTGGTATGGCCGGTTGGTTCTACATTCTTTATGAAGTATTCTCAGGTGAAGCAGGAAAAGCTGCAGCAAAAAGTGGAAACAAAGCTCTTGTTACTGCATTTGGTGCAATGAGAATGATCGTCACAGTAGGTTGGGCAATTTACCCACTAGGTTACGTATTTGGTGTCTTAACTGATTCTGCTAACCCAGAAGTACTTAATGTTATTTATAACCTTGCTGACTTCATAAACAAGATTGCATTTGGTCTAGTAATTTGGGC…	434
673333	CAM_READ_0127673333	1	1	1	0	0	0	0	0	0	2	0	0	0	1	0	0	0	0	0	0	0.5	0	0.5	0.5	0.5	0.5	0.5	0	0	0.5	9.5	4	Yes	0.67	4.57	Candidatus Pelagibacter ubique HTCC8049	85	419	bop	bacteriorhodopsin	Signaling Molecules and Interaction	Environmental	TCTCATTTTGGGTGATTTCAATGGGGATGTTAGCAGCGACTGCTTTCTTTTTCTTAGAAGCGGGTAATGTTGCAGCAGGATGGAGAACGTCAGTAATTGTTGCCGGTCTAGTAACTGGTATTGCATTTATTCATTACATGTTACATGAGAGATGTATGGGTAACTACTGGTGATTCACCAACTGTTTACAGATATATTGACTGGTTAATTACAGTTCCATTACAGATGGTAGAATTTTATTTAATTCTAGCTGCTGTAGGTAAAGCAAATTCTGGAATGTTCTGGAGATTGCTAATTGGTTCAGTTGTGATGCTTAGTTGGAGGATTATTTTAGGAGAAGCAGGTTACATCAATGCTATGCTTGGTTTCGTTATCGGTATGGCTGGATGGG	391
395861	CAM_READ_0162395861	1	2.67	1	1	0	1.33	0.33	0	0	1	2	0.33	0.67	0.33	2	2.33	1	0.33	1	2.33	2	0.33	2	1	0.33	0.67	2.33	2	0.33	2	33.64	3	0	0.56	8.14	Candidatus Pelagibacter ubique HTCC8049	91	677	bop	bacteriorhodopsin	Signaling Molecules and Interaction	Environmental	CAGACGCAAATATGTTATTGCAAGATGACTTCGTTGGTATTTCATTTTGGGTAATATCTATGGGAATGTTAGCAGCTACTGCTTTCTTTTTATGGAAGCAGGTAATGTTGCAGCAGGCTGGAGAACTTCAGTTATTGTTGCTGGTCTAGTTACTGGTATTGCATTCATACACTACATGTACATGAGAGAAGTATGGGTAAGTACTGGAGACTCACCAACAGTTTACAGATACATTGATTGGTTAATCACTGTACCACTACAAATGGTTGAATTTTATCTAATTCTATCAGCTGTAGGAAAAGCAAATTCAGGAATGTTCTGGAGATTGCTACTTGGTTCAGTTGTGATGCTAGTAGGTGGATATTTAGGAGAAGCTGGATACATCAACGCTATGCTTGG…	494
865799	CAM_READ_0085865799	0.5	2.67	2.17	2.33	0.67	1	0.33	0	0.83	1	2	0.5	0.5	4.33	4.5	1.67	0.83	1.83	0.5	1.5	0.83	0.5	0.5	0	0	0	0.67	0.33	0.17	1	33.66	3	0	0.58	6.19	Candidatus Pelagibacter ubique HTCC1061	80	313	bop	bacteriorhodopsin	Signaling Molecules and Interaction	Environmental	GGAGAATATTAATTGGTTCTATCGTAATGCTTGTTGGTGGATATGCAGGAGAAGCTGGATTCATTAATGCGATGCTTGGTTTCATAATCGGTATGGCAGGATGGATTTACATTCTTTATGAAATATTCTCTGGTGAAGCAGGTAAATCAATGGCTAAGTCAGGTAACAAGTCTCTTGTTACTGCATTCAGTGCATTGAGAATGATCGTTACTGTTGGTTGGGCAATCTACCCACTAGGATATGTATTTGGATATCTAACAAGTGGAATAGATGCAAACTCTTTGAACGTAATTTACAACTTAGCTGACTTTGTAAATAAGATCGCTTTTGGTCTAATTATCTGGTCATGTGCAGTTGCTAATTCCGGAAAAAGCAGAGCTTAATTAGTAGAAC	393
721827	JCVI_READ_721827	3	11.25	16.5	5.5	3.25	11	2	2	2.5	11.5	11.25	4.75	8	21.75	17.25	9	7.75	6	5.5	12.75	12.5	8.25	13	13.25	3	1.75	10.5	6.75	4.25	13	258.75	3	0	0.62	9.56	Candidatus Pelagibacter ubique HTCC8049	87	682	bop	bacteriorhodopsin	Signaling Molecules and Interaction	Environmental	TTATGAAAAAACTTAAATTGTTTGCTCTTACAGCTATTGCACTATTAAGTGTATCAGGTGTAGCAAACGCAGATGCCATGTTAGCTCAAGATGATTTCGTAGGAATTTCATTTTGGGTGATTTCAATGGGGATGTTAGCAGCGACTGCTTTCTTTTTCATGGAAGCGGGTAATGTAGCATCAGGCTGGAGAACTTCAGTTATTGTTGCCGGTTTAATCACTGGTATCGCATTCATACACTACATGTATATGAGAGATGTATGGGTAAGCACTGGAGACTCACCAACAGTATATAGATATATTGACTGGCTAATAACTGTGCCATTACAGATGGTAGAATTCTACTTAATTCTAGCAGCTGTAGGAAAAGCAAATTCTGGAATGTTCTGGAGATTGTTAA…	770
10376	JCVI_READ_1103359010376	1	0	1.5	0.5	2	0.5	0	0.25	0	1	3	0	0	1.5	0	2	1	0.5	0.5	2.5	1	0	1	0	0	0	1.25	0.5	1	0	22.5	3	0	0.68	4.35	Candidatus Pelagibacter ubique HTCC8049	88	529	bop	bacteriorhodopsin	Signaling Molecules and Interaction	Environmental	TTATGAAAAAACTTAAATTGTTTGCTCTTACAGTTGTTGCATTATTAGGTGTAACAGGTGTTGCAAACGCAGACGCCATGTTAGCTCAAGATGATTTCGTAGGAATTTCATTTTGGGTGATTTCTATGGGAATGTTAGCAGCTACTGCTTTCTTTTTTATGGAAACAGGCAATGTAGCATCAGGCTGGAGAACTTCAGTTATTGTTGCAGGTCTAGTTACTGGTATTGCATTCATACACTACATGTACATGAGAGAAGTATGGGTGACTACAGGTGATTCACCAACAGTTTACAGATACATTGACTGGCTAATTACTGTGCCACTACAGATGGTAGAATTTTATTTAATTCTAGCAGCTATTAATAAAGCAAATTCAGGCATGTTCTGGAGATTATTAA…	493
883216	JCVI_READ_1103242883216	0.5	0.75	1.25	0.5	1	2	0	0.25	0	1.25	0.25	0.5	0.75	0.75	2	1.25	0.25	0.75	1.5	1	0.5	1	1.75	2	0.25	0	2.75	1	0.25	1.5	27.5	5	0	0.46	7.89	Candidatus Pelagibacter ubique HTCC7211	93	479	bop	bacteriorhodopsin	Signaling Molecules and Interaction	Environmental	AAAAACGGCTGGGTTCTGCTGCATTGGTAAGCAATTCTGGAATGTTCTGGAGATTGTTACTTGGTTCAGTTGTAATGCTAGTAGGTGGATACTTAGGAGAAGCAGGATACATCAACGCTACACTTGGTTTCATTATCGGTATGGCAGGTTGGGTATACATTCTTTATGAAGTATTCTCAGGTGAAGCTGGTAAAGCTGCTGCAAAAAGTGGAAACAAAGCACTTGTTACTGCATTTGGCGCAATGAGAATGATTGTTACAGTAGGTTGGGCAATTTACCCATTAGGTTATGTATTTGGTTACTTAACAGGTGGTGTAGATGCTGAGTCACTTAACATCGTTTACAACTTAGCTGACTTTGTTAACAAAATTGCATTTGGTCTAGTAATTTGGGCTGCTG…	441
48033	NCBI_READ_1112309048033	2.5	8	6	5.5	1.5	3.5	1.5	2.5	3.5	6.5	8	1.5	5	11	13	8	3	4.5	9	10	7.5	9	10.5	8.5	3.5	1	11.5	8	6.5	17	197	5	0	0.6	8.47	Candidatus Pelagibacter ubique HTCC1062	91	913	bop	bacteriorhodopsin	Signaling Molecules and Interaction	Environmental	CAATGGCATGTCTAGCGGCAACTGTTTTTTTTTTTTTGAGAGAAGTTCAGTCCAGCACAATGGAGAACGTCAATAACTGTGCAGGACTAGTTACTGGTATTGCATTTATTCACTACATGTACATGAGAGATGTATGGATTACGACTGGTGAGTCACCAACAGTATACAGATATATTGACTGGTTAATTACAGTTCCATTATTGATGTTAGAATTCTATTTTGTTCTAGCAGCAGTAGGTAAAGCAAATTCTGGAGTATTCTGGAGATTGTTATTAGGAACACTAGTAATGTTAATCGGTGGATACTTAGGAGAAGCAGGATATATCAACTCTACACTTGGTTTCGTAATCGGTATGGCTGGTTGGTTCTACATTCTTTATGAAGTATTCTCAGGCGAAG…	654

## Sheet: Pro.NPSG
Transcript ID	Full transcript ID	SRS593027	SRS593028	SRS593029	SRS593030	SRS593032	SRS593034	SRS593036	SRS593037	SRS593038	SRS593041	SRS593043	SRS593045	SRS593048	SRS593049	SRS593050	SRS593051	SRS593052	SRS593053	SRS593054	SRS593055	SRS593056	SRS593057	SRS593058	SRS593059	SRS593060	SRS593061	SRS593062	SRS593063	SRS593064	SRS593065	Transcription Sum	Transcription cluster	Significant cluster assignment?	False discover rate for periodicity	Fourier	Closest organism	NT identity %	Total score	Gene	Gene annotation	Pathway KEGG	Source of the target seq	Sequence	Sequence length
157984	JCVI_ORF_1105155157984	17.33	8.67	2.67	1.67	1.67	2.33	3.33	1.67	6.33	25.33	15	1.67	1.33	5.33	4.67	3.33	13.33	18.67	42.67	5	6.33	4.33	4.67	6.33	10.67	2.67	42.33	15.67	6	27.33	308.33	3	NA	0.0092562	14.5527	Prochlorococcus marinus str. MIT 9215	91.13	1342	amt	ammonium transporter	Membrane Transport	Environmental	GCAGCTGAGCAGCGCTCTATGTTGTGGCTTGCAACTGTTCCTGTAGCTCTGTTTGGTTTAGGTATTTTTAATCTTTCTGCTCATGCAGGCGATCTACCTGAGTTGAATGCAGCTTTTCTTGCCAATAACTTATGGCTATTGGTCGCTACTATTCTAGTGATCTTCATGAACGCCGGCTTCGCTATGGTAGAAGCAGGTATGTGTCGTTCTAAGAACGCCGTCAACATTCTTGCTAAAAACCTATTCGTATTCGCTCTTGCTGTTACCTCTTATTGGGTAATAGGCTACTCGCTAATGTACGGAGACAGTATTGCTGGTGGATGGCTATATTTTATGGGCCTATTTTTTGATCCAACAGTTACAGCAGAAACAGTTGCTGATGCTGGATTAGTCCCTACA…	1062
14232	JCVI_ORF_1105135014232	4.5	1	2	1.5	0	1.5	1	0.5	3	6	6.5	0.5	0	1	2	2	2	7	11	3	1	2.5	1	2.5	4.5	3	24.5	9.5	2	18.5	125	3	NA	0.0248744	13.0596	Prochlorococcus marinus str. MIT 9301	89.91	1007	amt	ammonium transporter	Membrane Transport	Environmental	ATGACCACTGCTTTGCAAACGCCTCAAAGGCGCTCTAGGTCCAAACTACAAGATGCAAGTCTTGTAAATGGGCCTATGCTCCTTTTGAGGAGTATTCGAGGATTTAGTTCAAACCGCTCTATGTTGTGGCTTGCAACTATCCCTGTAGCTCTGTTTGGTTTAGGTATTTTTAATCTTTCTGCTCATGCAGGCGATCTACCTGAGTTGAATGCAGCTTTTCTTGCCAATAATTTATGGCTATTGGTCGCTACTATTTTAGTGATCTTCATGAACGCCGGCTTCGCCATGGTAGAAGCAGGTATGTGTCGTTCTAAGAACGCCGTCAACATTCTTGCTAAAAACCTATTCGTATTTGCTCTTGCTGTTACCTCCTATTGGGTAATAGGATACTCGCTAATG…	870
105767	CAM_READ_0088105767	4.33	1.33	1.33	0	0.33	0.33	0.67	0.67	2	3.33	4.33	2	0	1	1	1.33	2.67	3.67	6.33	2	2.33	0.67	1.67	0.67	2.67	0.33	13.33	5.33	1.33	5	71.98	3	NA	0.00473684	15.2181	Prochlorococcus marinus MED4	89.16	543	amt	ammonium transporter	Membrane Transport	Environmental	GTAGACTTTGCAGGATCTTCAATTGTTCACTCAGTTGGGGCTTGGGCAGGTTTAGTTGGAGCTATGCTTCTTGGACCAAGAATTGGTAAATACTCTGATGGTAAACCACAGGCTATGCCTGGACACAATATGGCTATTGCCACTTTGGGGGCATTAGTTTTATGGATTGGTTGGTATGGATTTAATCCTGGTTCTCAGCTAGCTATGGATCAATGGGTACCATATGTTGCTGTAACAACAACTCTTGCAGCTGCGGCTGGTGCTATTGGAGCAACTATTGTTTCTACTTTAACCTCAGGGAAGCCTGATCTTACAATGATCATTAATGGTATTCTTGCTGGTTTAGTTAGTATCACTGCAGGTTGTGGTGATATGACTCTTGCGGGCGCTTGGTTTGCC…	498
56822	JCVI_ORF_1105155056822	3.4	1	1	2	0.4	0.8	0	1	2.8	6.4	3.8	1	0.2	0.4	1.2	1.6	1.2	5	7.6	2.4	1	0.6	0	1	3	0.8	9.2	2.8	1.6	3	66.2	3	NA	0.00479167	15.1918	Prochlorococcus marinus str. MIT 9301	84.95	789	amt	ammonium transporter	Membrane Transport	Environmental	GGGTTGGCAGGGCGGGATGGCTATATTTTAGGCGGCTTATTTTTTGATCCAACTGTAACCGCTGATATGGTTACAGACGGAGCATTAGTCCCAACTGTAGATTTCTTGTTCCAGTCTGCTTTCGCAGGAACAGCTGCAACAATTGTTTCTGGACTTGTTGCTGAAAGAGTTAAATTTGGTGAATTCGTTGTTTTTGCAATTGTACTCACAGCATTTATCTACCCTATTGCAGGAAGTTGGCAATGGAATGGAGGTTGGCTCTCTGAACTAGGTTTTATTGATTTTGCCGGATCTTCAATTGTTCATTCAGTTGGAGCATGGGCAGGTTTGGTAGGAGCTATGCTTCTTGGACCAAGAATTGGTAAGTATGCTGATGGGAAACCTCAAGCTATGCCAGGC…	1038
2731	P9312_02731	1.2	1	0.2	1.4	0	0	1	0.2	0.6	2	1.8	0.2	0	0	1	1.4	2	2.2	5.8	1.4	1.6	1.2	0.2	0.2	2.4	1.8	6.2	5.2	1.8	4.4	48.4	3	NA	0.00555556	15.1477	Prochlorococcus marinus str. MIT 9312	100	2902	amt	ammonium transporter	Membrane Transport	Genomic	ATGACCACTGCTTTGCAAACGCCTCAAAGGCGCTCTAGGACCAGATTACAAGACGCAAGTCTTGTAAATGGACCTATGCTCCTTTTGAGGAGTATTCGAGGATTTAGTTCAAACCGCTCCATGTTGTGGCTTGCAACTGTTCCTTTAGCACTTTTTGGATTAGGACTTTTTAATGTTGCTGCTCATGCAACAGAACTTCCTGATCTTAATGCAGCATTTTTAGCAAATAACCTTTGGTTATTTGTTGCAACAATTTTAGTTATCTTCATGAATGCTGGTTTCGCTATGGTAGAAGCCGGTATGTGTAGATCTAAAAATGCTGTCAACATTCTCGCCAAAAACCTTTTTGTATTTGCTTTAGCAGTTACTTCATATTGGTTTATTGGATTTGGAATTATG…	1464
589413	JCVI_ORF_1112708589413	2.25	0.5	1	0.25	0.25	0.25	0	0	1	3.25	2.5	0.25	0.25	0.75	0.75	0.75	2	1.75	3.25	1	0.5	1.5	0.5	0	1.25	0.5	4.25	1.75	0.25	2	34.5	3	NA	0.0346429	12.5568	Prochlorococcus marinus MED4	86.46	858	amt	ammonium transporter	Membrane Transport	Environmental	TTGAATGCAGCTTTTCTTGCTAACAATTTATGGCTTTTGATCGCTACTATCTTAGTGATCTTCATGAACGCTGGTTTCGCTATGGTTGAGGCAGGTATGTGCCGTTCTAAGAACGCAGTAAACATTCTTGCTAAAAACCTCTTTGTATTTGCTCTGGCTGTAACTGCCTATTGGGTAATTGGTTACAAACTCATGTATGGAGATAGCGTACTTGGCGGATGGCTATATTTTGGCGGCTTATTTTTTGATCCAACTGTAACCGCAGATATGGTTACTGATGGAGCATTAGTTCCAACTGTTGACTTCTTATTCCAGTCTGCTTTTGCAGGTACTGCTGCAACAATTGTTTCCGGACTTGTTGCTGAAAGAGTTAAATTTGGTGAATTTGTTGTTTTTGCC…	945
719709	JCVI_ORF_1112711719709	0.67	0.67	0.17	0.17	0	0	0.5	0.17	0.83	1.67	2.33	0.17	0	0	0.33	0.17	0	1.33	2.5	0.33	0.67	0.67	0.5	0.33	1	0.17	3.33	2.33	0.17	1.67	22.85	3	NA	0.0133577	14.1197	Prochlorococcus marinus str. MIT 9312	90.22	1049	amt	ammonium transporter	Membrane Transport	Environmental	CTTAATGCAGCATTTTTAGCAAATAATCTTTGGTTATTTGTTGCAACTATTTTAGTTATCTTCATGAATGCTGGTTTCGCTATGGTTGAAGCCGGTATGTGTAGATCTAAAAATGCTGTAAATATTCTCGCCAAAAACCTATTTGTATTTGCTTTAGCAGTTACTTCTTATTGGTTTATTGGATTTGGAATTATGTATTACGGAAAGGAAATAATTCCTGGAGTACTCTATTTTAATTCCTTATTCTTTGACCCAACAGTTACTGCTGAGATGATTGATGATGCAGCATTAGTCCCAACTGTTGACTTCTTATTCCAAGCAGCTTTTGCTGGAACTGCAGCAACGATTGTTTCTGGTCTTGTAGCAGAAAGAGTGAAATTCGGAGAATTTGTCGTCTTC…	875
791182	JCVI_ORF_1105135791182	0.8	0.4	1	0.4	0.4	0	0.2	0	0.4	0.8	1.6	0	0.2	0.2	0.4	0.2	1	0.4	1.6	0.2	0.2	0.4	0.4	0.2	0.4	0	1.4	2.4	0.4	0.8	16.8	3	NA	0.0939871	10.7367	Prochlorococcus marinus str. MIT 9215	89.62	1072	amt	ammonium transporter	Membrane Transport	Environmental	GTTCCTTTAGCTTTGTTTGGTTTAGGTATTTTTAATCTTTCAGCTCACGCAGCTGATTTACCTGAGTTGAATGCAGCTTTTCTTGCTAACAATTTATGGCTTTTGATCGCTACTATCCTAGTGATCTTTATGAACGCTGGTTTCGCTATGGTTGAGGCAGGTATGTGCCGTTCTAAGAACGCAGTAAACATCCTTGCTAAAAACCTGTTCGTATTTGCTTTAGCTGTAACCGCATATTGGGTTATCGGTTATAAGCTTATGTATGGAGATAGCGTTGCTGGGGGATGGCTATATTTTGGAGGCCTATTTTTTGATCCCACTGTAACTGCAGATATGGTTACTGATGGGGCATTAGTTCCAACTGTTGACTTCTTATTCCAGTCTGCCTTCGCAGGAACT…	957
925894	JCVI_ORF_1105154925894	198.4	267.8	53.4	114.2	17.8	18.2	73.6	52.2	177.8	511	412.4	29.8	16	23.2	37.8	48.8	128.6	190.6	282.6	557.2	221.4	102.8	38.2	29.2	304	305.4	1180.4	990	545	463.4	7391.2	3	Yes	0.00386667	15.5552	Prochlorococcus marinus str. AS9601	96.61	1814	amt	ammonium transporter	Membrane Transport	Environmental	CAGCTGATTTACCTGAGGTGGAATGCAGCTTTTCTTGCTAACAATTTATGGCTTTTGATCGCTACTATCTTAGTGATCTTCATGAACGCTGGTTTCGCTATGGTTGAGGCAGGTATGTGCCGTTCTAAGAACGCAGTAAACATCCTTGCTAAAAACCTCTTTGTATTTGCTCTAGCTGTAACTTCTTATTGGTTTATAGGCTACTCATTAATGTACGGAGGAAGTGTTGCTGACGGATGGCTTTATTTTGGAGGCTTATTCTTTGATCCAACAGTCACCGCTGATATGGTTACTGATGCTGGATTAGTCCCAACTGTTGATTTCTTGTTCCAGTCTGCATTCGCAGGAACTGCAGCAACTATCGTTTCCGGTCTTGTTGCTGAAAGAGTTAAATTTGGA…	1083
601496	JCVI_ORF_1105121601496	225.6	99.2	77.2	33.6	35.4	24.6	34.8	25.8	73.4	303.6	251.8	28.8	31.4	63.2	83	121.8	100.2	442.4	695	91.6	179	101.2	79.4	66.6	225.6	81.2	857.6	456.6	76	524.4	5490	3	Yes	0.0159259	13.7642	Prochlorococcus marinus str. AS9601	96.86	1893	amt	ammonium transporter	Membrane Transport	Environmental	TCTAAGAACGCAGTAAACATCTTGCTAAAACCTACTCGTATTGCTCTAGCTGTACCTCTTATTGGTTTATTGGCTATTCATCAATGTACGGAGGTAGTGTTGCTGACGGATGGCTGTATTTTGGAGGCCTTATTTTTTGATCCAACAGTTACCGCAGATATGGTAACTGATGCTGGATTAGTCCCAACAGTTGATTTCTTGTTCCAGTCTGCATTCGCAGGAACTGCGGCAACTATCGTATCCGGTCTTGTTGCTGAAAGAGTTAAATTTGGAGAATTTGTTGTTTTTGCTGTCGTATTAACTGCATTTATATATCCAATTGCTGGTAGCTGGAAATGGAATGGTGGTTGGCTTGATTCATTAGGTTTTGTAGACTTTGCTGGTTCTTCAATTGTTCAC…	1119
751286	JCVI_ORF_1105102751286	62.5	36.5	29.5	16	10	8	16.5	18.5	52.5	133	164	19.5	18.5	32	45.5	55	65	315.5	434	62	77.5	43	36	37.5	76	43	462.5	191.5	67.5	271	2899.5	3	Yes	0.0215054	13.2756	Prochlorococcus marinus str. AS9601	93.39	1461	amt	ammonium transporter	Membrane Transport	Environmental	GCTGGGAGAATTTTATGTGGCCTATTTTTTGATCCCACAGTTACTGCCGAAACAGTTGCTGATGCTGGATTAGTTCCAACAGTTGATTTCTTGTTCCAGTCTGCTTTTGCAGGAACTGCTGCAACAATCGTATCCGGTCTTGTTGCTGAAAGAGTTAAATTTGGAGAATTTGTTGTTTTTGCTATTGTATTAACTGCATTTATATATCCAATTGCTGGTAGCTGGAAATGGAATGGTGGTTGGCTTGATTCTCTAGGTTTTGTTGACTTCGCTGGTTCTTCAATTGTGCACTCAGTTGGAGCTTGGGCGGGTCTGGTAGGAGCTATGCTTCTTGGACCAAGAATTGGCAAATACTCTGATGGGAAACCACAGGCTATGCCAGGACACAATATGGCTATA…	1029
628278	JCVI_ORF_1105156628278	71.17	54.17	31.83	21.5	7.33	16.5	35.67	30	97.33	141.17	92	27.83	9.17	18.83	28.83	44.67	79.5	175.5	216.5	54.5	43.67	31.5	25.33	27.17	73.67	72.17	380	198.17	77.67	221	2404.35	3	Yes	0.0005	17.3343	Prochlorococcus marinus str. MIT 9301	96.84	1043	amt	ammonium transporter	Membrane Transport	Environmental	ATGACCACTGCTTTGCAAACGCCCCAAAGGCGCTCTAGGTCCAAACTTCAAGATGCAAGTCTTGTAAATGGGCCTATGCTCCTTTTGAGGAGTATTCGAGGATTTAGTTCAAACCGCTCTATGTTGTGGCTTGCAACTGTTCCTTTAGCTTTGTTTGGTTTAGGTATTTTTAATCTTTCAGCTCACGCAGCTGATTTACCTGAGTTGAATGCAGCTTTTCTTGCTAACAATTTATGGCTTTTGATCGCTACAATTTTAGTGATCTTTATGAACGCCGGTTTCGCTATGGTTGAGGCAGGTATGTGCCGTTCTAAGAACGCTGTAAACATTCTTGCTAAAAACCTATTCGTATTTGCTCTAGCTGTAACTTCTTATTGGTTTATCGGCTATTCATTAATG…	651
716922	JCVI_ORF_1105094716922	146.8	89.6	58.2	27	20	13.6	38.2	25.6	89.4	137.2	100.2	29.4	10	17.6	21.8	25.2	89	99.2	130	87.6	66.6	41.4	32.4	20.8	99	76.6	296.6	260.4	59.6	156.6	2365.6	3	Yes	0	17.8704	Uncultured Prochlorococcus marinus clone HOT0M-8G12	92.33	1398	amt	ammonium transporter	Membrane Transport	Environmental	GTATATTTTTATGGGCTATTTTTTGATCCAACAGTTACTGCTGAAACAGTGGCTGATGCTGGGTTAGTCCCAACAGTTGATTTCTTATTCCAGTCTGCTTTTGCAGGAACTGCAGCAACTATCGTTTCCGGTCTAGTAGCTGAAAGAGTTAAATTTGGAGAATTTGTTGTTTTTGCGATTGTATTAACAGCATTTATTTATCCGATTGCTGGAAGCTGGAAATGGAATGGTGGATGGCTAGATGCGTTAGGTTTTGTTGATTTTGCTGGTTCTTCAATTGTTCACTCAGTTGGAGCATGGGCAGGCCTAGTAGGAGCTATGCTTCTTGGGCCAAGAATTGGTAAATACTCTGATGGAAAGCCTCAAGCTATGCCAGGACACAATATGGCTATAGCCACT…	1033
622771	JCVI_ORF_1112716622771	31.83	33.67	11.17	18.17	2.17	5.33	5.33	8.67	18.17	39.83	55.17	4.33	2.83	3.33	8.17	6.33	22	26.67	36.67	72.5	25.83	11.83	5	6.17	33.17	30.67	120.17	105.5	62.17	37.17	850.02	3	Yes	0.00177419	15.9245	Prochlorococcus marinus str. MIT 9215	92.72	1055	amt	ammonium transporter	Membrane Transport	Environmental	CTGCATATGGACAGTCGGTTACTCAATTATGTACGGAGAGAGTATAGCTGGAGGTGGCTGTATTTTAATGGTTTATTTTTTGACCCTACTGTAACAGCTGAAACTGTCGCTGATGGTGGATTAGTCCCTACTGTAGATTTTCTATTCCAGTCTGCTTTCGCTGGTACTGCTGCAACAATTGTGTCTGGTCTTGTCGCTGAAAGAGTCAAGTTTGGAGAATTTGTTGTTTTTGCGATTGTATTAACTGCATTTATATATCCAATTGCTGGTAGCTGGAAATGGAATGGTGGTTGGCTTGATTCTTTAGGTTTTGTTGACTTTGCTGGCTCTTCAATTGTTCACTCAGTTGGAGCATGGGCGGGTCTTGTAGGAGCCATGCTTCTTGGACCAAGAATTGGC…	867
895260	JCVI_ORF_1105095895260	31.6	17.2	13.8	5.2	3.6	2	7.4	4.2	17.2	27.6	19.2	3.8	3.2	3.6	4	7.2	18	23.6	32	19.2	13.6	10.8	6.8	6	20.2	15.6	67.4	47.2	16.2	41	508.4	3	Yes	0	17.5905	Prochlorococcus marinus str. MIT 9215	90.24	1090	amt	ammonium transporter	Membrane Transport	Environmental	ATAGGCTACTCGCTAATGTACGGACTTTGTGTTGCTGGTGGATGGCTATATTTTATGGGCCTATTTTTTGATCCAACAGTTACTGCCGAAACAGTTGCTGATGCTGGATTAGTCCCAACAGTTGATTTCTTATTCCAGTCTGCTTTTGCAGGAACTGCTGCTACCATCGTTTCCGGTCTTGTAGCTGAAAGAGTTAAATTTGGAGAATTTGTTGTTTTTGCGATTGTATTAACAGCATTTATTTATCCTATTGCTGGTAGCTGGAAATGGAATGGTGGTTGGCTGGATGCATTGGGTTTTGTTGATTTTGCTGGTTCTTCAATTGTTCACTCTGTTGGAGCTTGGGCTGGTCTTGTAGGAGCTATGCTTCTTGGGCCAAGAATTGGTAAATACTCTGAT…	915
2681	PMED4_02681	11.8	9.6	7.4	3.2	0.6	3	5.2	3.2	13.8	24.6	14.4	2.2	1.6	4.2	5.2	7	10	31.2	31.4	6.8	6.4	5	4.4	4.8	11.4	8.4	57.2	26.2	8.6	33	361.8	3	Yes	0.0026087	15.7153	Prochlorococcus marinus MED4	100	2896	amt	ammonium transporter	Membrane Transport	Genomic	ATGACCACTGCTTTGCAAACGCCTCAAAGGCGCTCTAGGTCCAAACTTCAAGATGCAAGTCTTGTAAACGGACCTATGCTCCTTTTGAGGAGTATTCGTGGGTTCAGTTCAAACCGCTCAATGTTGTGGCTTGCAACTGTCCCTCTAGCTTTGTTTGGTTTAGGTATTTTTAATCTTTCAGCTCACGCAGCTGATTTACCTGAGTTGAATGCAGCTTTTCTAGCTAACAATTTATGGCTTTTGATCGCTACTATTTTAGTGATCTTCATGAACGCCGGTTTCGCTATGGTTGAAGCGGGTATGTGTCGGTCTAAAAACGCCGTCAACATTCTTGCTAAAAACCTTTTCGTATTTGCTTTAGCTGTAACCTCTTATTGGTTTATTGGCTACTCATTAATG…	1461
5691	A9601_05691	1.2	1.4	1	0	0	0	0.2	0.2	0	0	0.4	0	0.8	1.2	1.4	1	0	0.2	2.8	3.8	1.2	0.6	0.8	2	1.8	0	0	0.4	0.2	0.8	23.4	0	NA	0.501861	5.77612	Prochlorococcus marinus str. AS9601	100	688	arsC	arsenate reductase	Unclassified	Genomic	TTGAAAAAAATAATTTTTTATAGTTATTTAAAATGCTCTACATGCCGAAAAGCTGCAAAGTGGCTTGAAAGCAAAGATTTTGAATTTCAGTTGATTGATATTGTTAAAGAACCTCCACTTGTTAATTATTTAAATCTAGCCTTAGAACAATACTCTGATGATAAGAAAAGGATTTTTAATACAAGAGGTAAAGCCTTTAAAAGTCTTAATCTTGATATTGATAGTTTGTCAAAGGAAGAAATTATTCAACTTCTTTTAAGTGATGGTAAGTTAATAAAAAGACCATTTTTGATTTACGAAGGGAAAAAAGTAATATTAGGTTTTAACGAAATTGAATATGCAAAACAATTTTTATAA	357
518801	HF_READ_05518801	0.25	0	0.25	0	0.25	0	0	0	0.25	0.25	0	0.25	0	0	0	0	0.5	0	0	0	0.5	0	0	0	0.25	0.5	1	0.25	0.25	0.25	5	0	NA	NA	NA	Prochlorococcus marinus str. AS9601	92.83	829	carA	carbamoyl-phosphate synthase small chain	Amino Acid Metabolism	Environmental	ACAAGTGCCAGCTTGCATGCCTGCAGGTCGACTCTAGAGGATCCCCATAGATATGATGAATCTTCTAAAAAGTTAAAAATAATAGCAATTGATTTTGGAATTAAAAATTCAATTCTAAATAGACTTGTATCCCATGGCTGTGAAGTTTTGGTTCTACCTTCTCAATCTTCTTTAAATGATGTACTGTCTAACAAGCCGGATGGTATATTTTTCTCGAATGGTCCAGGCGATCCTTCTTCTGTTTCTGAAGGTATAGACTTAGCAAAATCACTCATTGAATATGGTGAAATACCTATGTTTGGTATTTGCCTTGGCCACCAAATATTTGGATTAGCATTAGGAGGCTCAACTTATAAATTACCTTTTGGACATCGTGGTTTAAATCATCCTTGTGGTGAA…	634
404704	JCVI_READ_1103769404704	0.2	0.4	0.2	0	0	0	0	0.2	0.2	0	0	0.2	0.2	0.8	0.8	0.4	0.4	0	0.2	1	0.8	0	0.6	0	0	0.2	0.2	0.4	1.2	0.2	8.8	0	NA	0.69456	4.1034	Prochlorococcus marinus str. MIT 9301	97.25	1185	cobN	cobaltochelatase CobN	Metabolism of Cofactors and Vitamins	Environmental	GTACGGGTGGTGGGGCTTAATAACACCATCCTTCGAAAAATAAATATTCTTAACTGGTTGCAAGAAGAAGGTTATGATCTTGGATCTGTAATTATCCTCAAGATTCTTCGGAATTAATGTCAATACTCATAAAAACTAGAACTAATGATCTTGAATCTCAAAATAATAAACCATTAGATTACTTACCACTTAGTGAATATTTAAAAATATTGGAATTATTTAGAACTTGAACCCAAAAAATATTATTGTTAACCGTTGGGGGCAAACCATCAGAAGCGATCGATCTTAATAATGAAGGCTTCTCAATAAATGGTATTAGATTTGGAAAAATAACATTATTGATTCAACCTCAACGAGGTTATGACGCTTTCACTGATAGAGATATTCATTCGCCCGATC…	1049
850483	HF_READ_04850483	0	0	0	0.2	0	0.2	0.6	0	0.2	1	0.2	0	0.2	0.8	0.6	0.8	0.6	0	0.8	0.2	0	0	0.6	0.2	0.2	0	0.2	0.2	0.2	0.4	8.4	0	NA	NA	NA	Prochlorococcus marinus str. MIT 9301	96.85	1140	cobN	cobaltochelatase CobN	Metabolism of Cofactors and Vitamins	Environmental	ATAAAAAAATTTTTATTGACTTTTCCCACCAAAACATTTTACTTAGATGCCCGTGATTTTGACACCAGCAAAGTATTAGTATAATTGTTTTTTTCCAAAAGAATCCCATATAAAAAATCTAGAAAAATATAAAATCAGAAATATAGCCTATTTCTTTAATGAAAAAACATATAAATATTTTTTATTATTAAAAAATGAGATTCTATATCCAATCATTAATTCTTCATATAATGAGAAATTATCATTTATTATTCATTAAATGGACAATATGTAAAAAGTGGTCATCCTGGAGCCCCTACGAGAGGTAAAACTGAAGCTTTACCCACTGGTAAAAATTTCTTTTCCAGTTGATTCGAGAGGACTGCCAACTGAATCAGCATGGAGTGTTGGTTGTCAATC…	898
814059	HF_READ_04814059	0	0	0	0.17	0	0	0	0	0	0.5	0.33	0	0.17	0.17	0.67	0.33	0.33	0	0.5	0.67	0.67	0.17	0	0.5	0.67	0	0.33	0.17	0.33	0.5	7.18	0	NA	NA	NA	Prochlorococcus marinus str. MIT 9301	99.2	1398	cobN	cobaltochelatase CobN	Metabolism of Cofactors and Vitamins	Environmental	GGAGGGNCACCAAGTTTTGTCGATACTAGCTGGTCCGCNAAACATTTAAACTAGAATTGGATCACTGGACAGGAGGAATGATCAAAAGTTAAGTGAAAAGGACAAAAAAAGATTATTGACTTTTTCCAACAAAAACATTTTAAACTTTAGAATGGCTATTGATTTTTTGGAACAACAAGCAAAGTATTTAATATATTTGTTTTTTTACAAAAAGAATACCAATATAAAAAATCTTGAGAAATATAAAAATCAGAAAATAATAGACTATTTCTTTAATGAAAAAAAACATAATAAGTATTTTTTATTATTAAAAAAAGAGATTCTATATCCAATCATTAATTCTTCATATAATGAGAAATTATCATTTATTAATTCGTTAAATGGACAATATGTAAAAAG…	1035
5001	A9601_05001	1	0	0	0	0	0	3	0	1	1	2	0	0	1	0	4	6	12.4	1.2	0	0	0	0	0.6	7	2	6.6	2	1	0	51.8	1	NA	0.0235385	13.1299	Prochlorococcus marinus str. AS9601	100	3223	coxA	cytochrome c oxidase subunit I	Energy Metabolism	Genomic	ATGACAATATCAATTGATCCACAAAAAACTAATAATGAAAGCCTTCAACCTAAAGGCTGGCTTAGATACTTTAGTTTTAGCCTTGATCATAAAGTAATTGGGATACAATACTTGGTTTGTGGTTTTCTCTTCTACTTAATAGGAGGAACCTTAGCGAGCGCTATAAGAATTGAACTAGCTAGTCCAATGTCTGATTTCATGCCAAGAGATGTTTATAACCAAGTTTTAACTTTACACGGAACAATAATGATATTCCTGTGGATAGTTCCTGTAGTCAACGGGGCTTTTGGAAATTATTTGATTCCATTTTATGTAGGTGCGAGAGATATGGCATTCCCAAGATTAAATGCAGTAGCTTTTTGGTTAATTCCTCCTTCAGGTTTGATGCTGGTAGCAAGC…	1626
38478	HF_READ_05038478	1.2	1.6	0	0	0	0	0.2	0.2	1.4	1.8	0.4	0	0	0	1	4.6	4	5.2	2.2	0.8	1	0	0.2	0	6.6	4.8	5.4	0.6	1.2	1.2	45.6	1	NA	0.0104688	14.3654	Uncultured Prochlorococcus marinus clone HOT0M-10D2	95.84	676	coxA	cytochrome c oxidase subunit I	Energy Metabolism	Environmental	TTATGACAATATCAATTGATCCACAAAAAACTAATAATGAAAGCCTTCAACCTCAAGGCTGGCTTAGATACTTTAGCTTTAGCCTTGATCATAAAGTAATTGGGATACAATACTTAGTCTGCGGTTTTCTTTTCTATTTAATAGGAGGAACCTTAGCGAGCGCTATAAGAATTGAACTAGCTAGTCCAATGTCTGACTTTATGCCGAGAGATGTTTATAACCAAGTTTTAACTCTACACGGAACAATAATGATATTCCTTTGGATAGTGCCTGTAGTTAATGGTGCTTTTGGAAATTATTTAATTCCATTTTATGTTGGTGCAAGAGATATGGCATTCCCAAGATTAAATGCAGTTGCTTTTTGGTTAATTCCTCCTTCAGGTTTGATGCTGGTAGCAA…	453
614120	JCVI_READ_614120	0.8	0	0.4	0.6	0	0.6	1.2	1	2.2	0.6	1	0.2	0.2	0	1	3	3.8	5	0.8	1	0.8	0	0	0	4.4	2	4.4	1	0	1	37	1	NA	0.000909091	16.4955	Prochlorococcus marinus str. AS9601	95.57	1626	coxA	cytochrome c oxidase subunit I	Energy Metabolism	Environmental	CAAGTTTTTAACCCTTTCAGGAACCAAAAAAGATTTTTTTTATGGAATGGTCCCCGGAAGTTAAACGGTGGTTTTGGAAAATATTTAATTTCCATTTTATGTAGGTGGTAGAGATATGGCATTCCCAAGATGAATGGTGTAGTTTTTTGTTAATTCCTCTTTCAGGTTTGATGCTGGTAGCAAGGTATTTTGTTGAGGGTGCTGCTCAAGGCTGGATGGACGGCCTATCCTCCTTTGAGCATAACTACTCCTCAATCAGGACAAATTATTTGGATTTTGAGCGTCCTATTACTTGGAGGCAGTTCTATATTTGGTGGAATAAACTTTATCGCGACCATTATCAAATTAAGAAGGCCAGGATTAAAACTTATGCAATTGCCAATGTATTGTTGGGCAATG…	1100
635494	JCVI_READ_1092343635494	1.5	0.5	0.5	0.25	0.25	0.5	1.75	1.25	2.5	0.75	0.5	0	0	0.25	1.25	2.75	2.25	2.75	0.25	0.5	0.25	0.25	0	0	1.5	1.25	1.75	0.75	0.75	0.25	27	1	NA	0.00108108	16.5978	Prochlorococcus marinus str. MIT 9312	94.66	1193	coxA	cytochrome c oxidase subunit I	Energy Metabolism	Environmental	ATAAAAAAAGGGTATTTTGCAATTCATGATCCCAAAAACAATAATGAAGTTTCCACCTAAAGGGTGGCTAATACTTAGTTTAGTCTGATCATAAAGTAATTGGAATACAATATTTGGTTTGCGGTTTTCTTTCTATTTATAGGAGGAACTTAGCTAGCGCTATAAGAATTGAACTCGCTAGTCCAATGTCTGACTTTATGCCAAGAGATGTATATAACCAAGTTTTAACTTACATGGAACAATAATGATATTCCTTTGGATAGTGCCTGTAGTTAACGGTGCTTTTGGAAATTATTTAATTCCATTTTATGTGGGGGCAAGAGATATGGCATTCCCAAGATTAAATGCCGTAGCTTTCTGGTTAATTCCTCCTTCGGGTTTGATGTTAGTAGCGAGCTA…	880
328415	JCVI_READ_1103359328415	0	0	0.5	0	0	0.5	1.25	0.75	1	0	0.5	0	0	0.25	1	2.5	2.25	3.5	0.25	0	0	0.5	0	0.5	1.75	1.5	1.75	0.5	0	0.5	21.25	1	NA	0.00127273	16.202	Prochlorococcus marinus str. MIT 9301	93.93	638	coxA	cytochrome c oxidase subunit I	Energy Metabolism	Environmental	TTAGGGGACGGAACGGTTCACGTTAGGCGAAGTGGTCCCAAATGGTATTACCAGGGAACATAGTCTTCCGTGGTGGTGAGAAACCTCGTAAGGTAGAACCATTTTGATACCACAAGGTTTCATATGGGGATAGGGTTAGGTAGTTGTGGGGCTACCCAGTTAGAGATGGACACCCCGTGAGGAGATTGTTTTATTTTGCACGCCATTATTGTGTTCCAACAGTATAAATTTTCAATTGGGTGGGACATTATGGGGAGGTAAATTTCCATCAATAGTGCAATGTTATTCTCTGGGGATTTATTATAATTTTGTTTTTGGAGGTATACAGGAGTTGCTTTGGGCAGGTACCTTTCGATATTCACGTACATGATCCTATTTCGTGTAGCCCATTTCATTACA…	745
654773	JCVI_READ_1654773	0.33	0.33	0.67	0	0	0.33	0	0.33	0.67	0.67	0	0	0	0	0.33	1.33	1.67	1.33	1	0.33	1.33	0	0	0.33	1.67	3.33	2	0.67	0	0.67	19.32	9	NA	0.0608046	11.6449	Prochlorococcus marinus str. MIT 9312	93.9	1423	coxA	cytochrome c oxidase subunit I	Energy Metabolism	Environmental	ATAGTTGTTTTTTCAACTCCAGTTTGGGCAGGCACTTTAATTTTACTTAGCTTTGATATCATCGCCAATCCAGGTTTTTTTAATCCTGTTTAGGAGGGAATGTCGTAGTTTATCAGCATTTATTTTGGTTTTATTCACATCCAGCTGTTTACATTATGGTCCTTCCTGCCTTTGGTTTAGTTAGTGAAATACTTCCCGTACATGCTAGAAAACCACTTTTTGGATATACAACAATGGTTTTTTCAATAATGGGGATAGTAGTTTTAGGTTTAGTTGTTTGGGCGCATCACATGTTTACTAGTGGAACTCCCCCTTGGATGAGATTGTTCTTTACCATAGCGACTGCATTTATTGCAGTTCCAACGGGGATAAAATTTTTCAATTGGGTTGCGACATTAT…	1011
393523	JCVI_READ_1100018393523	0	0	0	0	0	0.5	1	0.5	0.5	0.5	0	0	0	0.5	0.5	2.5	2	2	0.5	0	0.5	0.5	0	0	2	1	1.5	1	0	0	17.5	1	NA	0	17.6829	Prochlorococcus marinus str. AS9601	95.44	1463	coxA	cytochrome c oxidase subunit I	Energy Metabolism	Environmental	TGTCAGTCTGAGTGCTGTAGTTACGGTGCTTTTGGAATTATTTAATTCCATTTTATGTAGGTGCGAGAGATATGGCATTCCCAAGATTAAATGCTGTAGCTTTTTGGTTAATTCCTCCTTCAGGTTTGATGCTGGTAGCAAGCTATTTTGTTGAGGGTGCTGCTCAGGCTGGATGGACTGCTTATCCACCTTTGAGCATAACTACTCCTCAATCGGGACAAATCATTTGGATTCTCAGCGTTCTATTACTTGGAGGTAGTTCTATATTTGGTGGAATAAACTTTATCGCGACCATTATCAAATTGAGAAGGCCAGGATTAAAACTTATGCAATTGCCAATGTATTGTTGGGCAATGCTTGGAACAAGTCTATTAGTTGTTTTGTCAACTCCTGTATTAG…	1014
484706	HF_READ_05484706	0	0.67	0.33	0	0	0	0.83	0.67	0.83	0.17	0.17	0.17	0	0.17	0.17	0.83	2.33	1.83	0.67	0.33	0.33	0.33	0.17	0	0.33	1.67	0.83	0.5	0.17	0.33	14.83	9	NA	0.0118657	14.2182	Prochlorococcus marinus str. MIT 9301	94.13	981	coxA	cytochrome c oxidase subunit I	Energy Metabolism	Environmental	AGCAGTGCAAGCTTGCATGCCTGCAGGTCGACTCTAGAGGATCCCCGATAAAATTTTTCAATTGGGTCGCAACATTATGGGGAGGTAAAATTTCGATCAATAGTGCAATGTTGTTCTCTTGCGGATTTATTATAAATTTTGTTTTTGGAGGTATTACAGGAGTTGCTTTGGCACAGGTTCCTTTTGATATTCACGTACATGATACCTATTTCGTTGTAGCCCATTTTCATTACATAGTTTATGGCGGGACTGTTTTTATTATTTTCTCATCGATATACCATTGGTTTCCCAAAGTAACTGGGAAAATGCTAAATGAAAAATTGGGAATTTTACATTTTATAATTACCTTTATTGGATTTAACTTGTGCTTTGCTCCTCAACATTGGCTCGGTTTAAATG…	699
272043	JCVI_READ_1103359272043	0.8	0.2	0	0	0	0.8	0.2	0.2	0.8	0.4	0.2	0	0	0.4	0.8	1.2	0.8	2.2	1.2	0.2	0.2	0	0	0	0.4	0	0.8	0	0	0	11.8	1	NA	0.0594186	11.6953	Uncultured Prochlorococcus marinus clone HOT0M-10D2	95.5	791	coxA	cytochrome c oxidase subunit I	Energy Metabolism	Environmental	TATGACCATATCAATTGATCCACAAAAAACTAATAATGAAAGCCTTCAACCTAAAGGCTGGCTTAGATACTTTAGTTTTAGCCTTGATCATAAAGTAATTGGCATACAATATTTAGTTTGCGGTTTTCTTTTCTACTTAATAGGAGGAACCTTAGCGAGCGCTATAAGAATTGAACTAGCTAGTCCAATGTCTGATTTTATGCCAAGAGATGTTTATAACCAAGTTTTAACTTTACACGGAACAATAATGATATTCCTTTGGATAGTGCCTGTCGTAAACGGTGCTTTTGGAAATTATTTAATCCCATTTTATGTAGGTGCGAGAGATATGGCGTTCCCCAAGATTAAATGCCGTTGCTTTTTGGTTAATTCCTCCTTCAGGTTTAATGCTGGTAGCGA…	565
44321	HF_READ_05044321	0.25	0.25	0.25	0	0	0	0.75	0.25	0.25	0	0	0	0	0	0	1	1	0.75	0.25	0	0	0	0	0.25	0.5	0.75	1	0.25	0.25	0	8	0	NA	NA	NA	Prochlorococcus marinus str. MIT 9301	96.41	803	coxA	cytochrome c oxidase subunit I	Energy Metabolism	Environmental	GCCGGTGCAGCTTGCATGCCTGCAGGTCGACTCTAGAGGATCCCCAGCCCATTTTCATTACATAGTTTATGGAGGGACTGTTTTTATTATTTTCTCTTCAATTTATCATTGGTTCCCCAAAGTAACTGGGAAAATGCTTAATGAAAAATTAGGAATTCTACATTTTATAATTACTTTTATTGGATTTAACTTGTGCTTTGCTCCTCAACATTGGCTTGGTTTAAATGGAATGCCGAGAAGAGTTGCAGAATATGATCCTCAATTCCAATTCGTGAATCAAATTAGTAGCCTTGGGGCTCTTTTGATGGCTATAAGTACAATTCCTTTTTTAATTAATGTATTCCTTAGCTTGAGAAATGGAAAAGATGCTGGAGATAACCCTTGGAATGCTCTTACACC…	527
225992	JCVI_READ_225992	1.8	0.8	1.4	0.2	0	0.4	2.6	3	3.8	2.2	1.6	0.6	0	0.2	1.4	9.4	11	10.8	6	1.2	0.6	1	0.8	1.6	8	5.6	9	2.4	0.4	1.6	89.4	1	Yes	0.000833333	17.2205	Prochlorococcus marinus str. AS9601	96.54	1614	coxA	cytochrome c oxidase subunit I	Energy Metabolism	Environmental	ACCAAGGTATTTTTTTTGAGGGGTGTTGCTCAGGGCTGGAATGGGACGGGTTTATCCCACCTTTGAAGCAATAATTACTCCTTCAATCGGGACAAAATTATTTGGATTTTTAAGCGTTCTATTACTTGGAGGCAGTCAAATATTTGGTGGAATAAACTTTATCGCGACCATTATCAAATTAAGAAGGCCAGGATTAAAACTTATGCAATTGCCAATGTATTGTTGGGCAATGCTTGGGACAAGTCTATTAGTTGTTTTGTCAACTCCTGTTTTAGCCGGTACTTTAATTCTACTTAGCTTCGATATCATCGCTAATACAGGTTTTTTCAATCCTGTTTTAGGTGGCAATGTCGTAGTTTATCAGCATTTATTTTGGTTTTATTCTCATCCAGCCGTATA…	1055
863887	HF_READ_04863887	2	1.5	0.5	0	0	1.5	2.5	1	2	2.5	1	0.5	0	1.5	3	6	10.5	7	3.5	0.5	1.5	1.5	0	0.5	6	3.5	6.5	1.5	1	1.5	70.5	1	Yes	0.000888889	16.4943	Uncultured Prochlorococcus marinus clone HOT0M-10D2	96.54	1713	coxA	cytochrome c oxidase subunit I	Energy Metabolism	Environmental	AAATTATGCAATATCAATGGATCCACTGTAAACTAATAATGAAAGCCTTCAACCTAAGGCTGGCTTAGATACTTTAGTTTTAGCCTTGATCATAAAGTAATTGGGATACAATACTTAGTCTGCGGTTTTCTTTTCTATTTAATAGGAGGAACCTTAGCGAGCGCTATAAGAATTGAACTAGCTAGTCCAATGTCTGATTTTATGCCAAGAGATGTTTATAACCAAGTTTTAACTTTACACGGAACAATAATGATATTCCTTTGGATAGTGCCTGTAGTAAACGGTGCTTTTGGGAATTATTTAATTCCATTTTATGTAGGTGCAAGAGATATGGCATTCCCAAGATTAAATGCAGTAGCTTTTTGGTTAATTCCTCCTTCAGGTTTGATGCTGGTAGCG…	1100
753693	HOT_READ_85753693	0.5	0.67	1.83	0	0	0.83	2.33	1	3.83	0.33	2.17	0	0	0	0.67	5.33	7.5	6	3.33	1.17	0.67	0	0.67	2.33	4.17	3.33	5.5	3	2	1.33	60.49	1	Yes	0.00111111	16.6022	Prochlorococcus marinus str. MIT 9301	95.03	767	coxA	cytochrome c oxidase subunit I	Energy Metabolism	Environmental	GGCAACCTTTTTGGGGGGAGGAAAAATTTTTCCAAAAAAAAAGGGCAAAGGTTATTTTTCTTGGGGATTTTATTAAAAAATTTGGTTTTTGGAGGGTATTTACAGGAGGTGGTTTTGGCAACAAGTCCCTTTGGAATTTTCAGGTACATGATCCTATTTTGGTTGTTGCCCATTTTTCATTTACATAGTTTATGGAAGGGACGTTTTTTATTATTTTCTCCTCAAATTTATCATTGGTTCCCCAAAGTAAACTGGAAAAATGCTCTATGAAAAATTAGGATTTTTGCATTTTATCATAACCTTTATTGGGATTTAACTTGTGCTTTGCCCCTCAACATTGGCTTGGTTTAAATGGAATGCCAAGAAGAGTTGCAGAATATGATCCTCAATTCCAGTTCG…	660
64603	HF_READ_05064603	0.4	0.6	0.2	0	0	1	1	0.6	1	0.4	0	0.8	0.2	1	1.6	2.8	5.2	3	2	1.6	1.6	0.6	0.4	0.4	3.2	1.8	3.6	0.6	0.4	1	37	1	Yes	0.00810811	14.7733	Prochlorococcus marinus str. MIT 9301	96.19	882	coxA	cytochrome c oxidase subunit I	Energy Metabolism	Environmental	TTATGACAATATCAATTGATCCACAAAAAACTAATAATGAAAGTCTTCAACCTAAAGGCTGGCTTAGATACTTTAGTTTTAGCCTTGATCATAAAGTAATTGGGATACAATACTTAGTTTGCGGTTTTCTTTTCTATTTAATAGGAGGAACCTTAGCGAGCGCTATAAGAATTGAACTAGCCAGTCCAATGTCTGATTTTATGCCAAGAGATGTTTATAACCAAGTTTTAACTTTACATGGAACAATAATGATATTCCTTTGGATAGTGCCTGTAGTTAATGGTGCTTTTGGAAATTATTTAATTCCATTTTATGTGGGTGCGAGAGATATGGCATTCCCAAGATTAAATGCTGTAGCTTTTTGGTTAATTCCTCCTTCAGGTTTGATGCTAGTAGCAA…	573
23477	HF_READ_05023477	0.5	0.33	0	0.17	0.17	0	0.67	0.5	1	0.67	0.33	0.17	0	0.33	0.83	2.67	3.33	3	0.33	0.17	0.33	0.17	0	0.17	1.83	1.5	3.5	0.5	0	0.33	23.5	1	Yes	0.00129032	16.7791	Uncultured Prochlorococcus marinus clone HOT0M-10D2	94.77	1070	coxA	cytochrome c oxidase subunit I	Energy Metabolism	Environmental	TTATGACAATATCAATTGATCCACAAAAAACTAATAATGAAAGTCTTCAACTAAAGGCTGGCTTAGATACTTTAGTTTTAGCCTTGATCATAAAGTAATTGGAATACAATACTTAGTCTGCGGTTTTCTTTTCTATTTAATAGGAGGAACCTTAGCTAGCGCTATAAGAATTGAACTAGCTAGTCCGATGTCTGACTTTATGCCGAGAGATGTATATAACCAAGTTTTAACCCTACATGGAACAATAATGATTTTCCTATGGATAGTGCCTGTAGTTAACGGTGCTTTTGGAAATTATTTAATTCCATTTTATGTAGGTGCTAGAGATATGGCATTCCCAAGATTGAATGCTGTAGCTTTTTGGTTAATTCCTCCTTCAGGTTTGATGCTGGTAGCAAG…	731
791548	HF_READ_04791548	0.25	0.5	0.25	0	0	0.5	2	0.75	0.5	1	1	0.5	0	0.25	1.75	7	6	7	1	1.25	0.25	0	0.5	0.25	5.75	3	3.25	0.25	0	1	45.75	1	NA	0.00383721	15.4314	Prochlorococcus marinus str. MIT 9301	95.13	819	coxB	cytochrome c oxidase subunit II	Energy Metabolism	Environmental	NACNGTGGAATATATTAATTTATAATAGAGAATGACCAATACCAAGTTATTCTATAGCCTTATTTTAATTTTAAGGAAAAGGAAATGATCAAATAAGCCGATGTTATAGCTTTAAGAGGGAATTTAACCTTTAGAAATTGTATGGACAAATATCCCTTCACTAATTGTTTTATTAATAGTTTTGTATAGCTACAACATATACGATCGAATGGGAGGGATGAAAGAACTAAACCATCACCACGAAATGATGAGTTCTAACACTGAAAAAATATGGGCTGGAATAAGTCAAACTTCTGATAATGAATCAGCAATAAATAATTTATCGATTGAAGTTTCAGCTATGCAATTTGCATTTCTATTCAATTATCCCAAGGGCAATTTCATATCAGGAGAACTACA…	677
866037	HF_READ_04866037	0	0	0	0.8	0	0	0.6	0.4	0.6	1	0.2	0	0	0	1.2	1.6	4	1	1	0	0	0.2	0.4	0.4	2.4	0.8	0.8	0.6	0.2	0.2	18.4	1	NA	0.01	14.4137	Prochlorococcus marinus str. MIT 9301	95.45	1053	coxB	cytochrome c oxidase subunit II	Energy Metabolism	Environmental	TTGTTAAATAAAGACATTTATTTAATACTAATTATTTCACTCGTTTTTGCTATATCTTTTTGGATTGGTTTTAATGTAAATTTGCTTCCAGCTGAAGCAAGTATCAATGCACCAATTTACGATGAACTTTTTAAAATTCTTTTCATTACTGGATTAATTATTTTTATAGGAATGACAATAGCTGTTATTTATAGCTTATTTAAATTCAGGAAAAGAAATGATCAGATAGGAGATGGCATAGCTTTAGAGGGAAATTTAAGCTTAGAAATTGTATGGACAATTATTCCTTCAATAATTGTTTTATTAATAGGTTTATATAGCTACAACATCTACGATCGAATGGGAGGGATGCCAGAACTAAATCATAACCACGAAATGATGAGTTCTAATTCTGAAAAA…	713
42239	HF_READ_05042239	0	0.6	0	0.2	0	0	0.2	0.2	0.4	1	0.2	0.2	0	0	0.2	1	1.4	0.8	0.2	0.4	0.2	0	0.4	0.2	1.4	0.6	0.4	0	0	0.2	10.4	1	NA	0.0256931	13.0072	Uncultured Prochlorococcus marinus clone HOT0M-10D2	93.48	989	coxB	cytochrome c oxidase subunit II	Energy Metabolism	Environmental	CGGGGGAGGGGCAGTGCAAGCTTGCATGCCTGCAGGTCGACTCTAGAGGATCCCCCTAGTATTAATGCGCCGATATACGATGAACTTTTTAAAATTCTTTTTATCGTAGGCTTAATTATTTTTATAGGAATGACAATAGCTGTTATTTATAGTTTATTTAAGTTTAGGAAAAGAAATGATCAGATAGGCGATGGTATAGCTTTAGAGGGAAATTTAAGCCTAGAAATTGTGTGGACAATTATTCCTTCAATAATTGTTTTATTAATAGGTTTATATAGTTACAATATCTACGATCGAATGGGAGGGATGAAGGAACTAAATCATAACCACGAAATGATGAGTTCAAATCCTGAAAAAATATGGGCTGGTATTAGTCAAACTTCTGATAATGAAACATCA…	766
793404	HF_READ_04793404	0	0.2	0	0	0	0	0.8	1	1	0.8	0.2	0.2	0	0.2	1.4	3.2	3.4	4.4	0.8	0.4	0	0.6	0.4	0	3.2	2	2.6	0.4	0.2	1.2	28.6	1	Yes	0.00115385	16.2429	Uncultured Prochlorococcus marinus clone HOT0M-10D2	96.11	981	coxB	cytochrome c oxidase subunit II	Energy Metabolism	Environmental	CAATTGTTAAATAAAAACATTTATTTAATTCTAATTATTTCACTAGTTTTGCTATATCTTTCTGGATTGGTTTTAATGTAAATTTGCTTCCAGCGGAAGCGAGTATCAATGCACCAATTTACGATGAACTTTTTAAGATTCTTTTTATCACTGGATTAATTATTTTTATAGGAATGACAATAGCTGTTATTTATAGCTTATTTAAGTTCAGGAAAAGAAATGATCAGATAGGAGATGGTATAGCTTTAGAGGGAAATTTAAGTTTAGAAATTGTATGGACAATTATTCCTTCAATAATTGTTTTGTTAATAGGTTTATATAGCTACAACATCTACGATCGAATGGGAGGGATGAAAGAACTAAATCATAACCATGAAATGGTGAGTTCTAATTCTGAAA…	636
481286	JCVI_READ_1093011481286	0	0.17	0	0	0	0	0.67	0.83	0	1.33	0.17	0	0	0	0	2.33	4.5	1.33	0.67	0	1	0	0.17	0.83	1.5	0.83	1.17	0.33	0.17	0.17	18.17	1	Yes	0.0151923	13.8632	Prochlorococcus marinus str. MIT 9301	95.87	1283	coxB	cytochrome c oxidase subunit II	Energy Metabolism	Environmental	CATTGTTAAATAAAAACTTTTATTTAATACTAATTATTTCCCTCGTTTTTGCTATATCTTTTTGGATTGGTTTTAATGTAAATTTGCTCCCAGTTGAAGCAAGTATTAATGCACCAATTTACGATGAACTCTTTAAAATTCTTTTCATCGTTGGATTAATCATTTTTATAGGAATGACAATAGCTGTTATATATAGCTTATTTAAGTTTAGAAAAAGAAATGATCAGATAGGCGATGGCATAGCTTTAGAGGGAAATTTAAGCTTAGAAATTGTATGGACAATTATTCCTTCAATAATTGTTTTATTAATAGGTTTATACAGCTACAACATCTACGATCGAATGGGAGGGATGAAAGAACTAAATCATAACCACGAAATGATGAGTTCTAATACTGAAA…	810
765244	HF_READ_04765244	0	0.17	0	0.17	0	0	0.5	1	1	0.67	0	0	0	0	1.17	0.67	3.17	1.83	0.5	0	0.17	0	0.33	0.17	2.5	1	0.67	0	0	0.17	15.86	1	Yes	0.00373494	15.4636	Prochlorococcus marinus str. MIT 9301	95.59	1074	coxB	cytochrome c oxidase subunit II	Energy Metabolism	Environmental	AATTGTTAAATAAAAACACTTATTTAATACTAATTATTTCTCTAGTTTTTGCTATATCTTTTTGGATTGGTTTTAATGTAAATTTGCTCCCAGCGGAAGCAAGTATTAATGCACCAATTTATGATGAACTTTTTAAAATTCTTTTCATTATTGGCTTAATTATTTTTATAGGAATGACAATAGCAGTTATTTATAGCTTATTTAAATTTAGGAAAAGAAATGATCAGATAGGCGATGGTATAGCTTTAGAGGGAAATTTGAGCTTAGAAATTGTGTGGACAATTATCCCTTCAATAATTGTTTTATTAATAGGTCTATATAGCTACAACATTTACGATCGAATGGGAGGTATGAAAGAACTAAATCATAACCATGAAATGATGAGTTCTAACACTGAAA…	702
940611	HF_READ_04940611	0	0.2	0	0	0	0.2	0	0.4	0.2	0.4	0.2	0	0	0	0.4	1	2.2	1.4	0	0	0	0	0	0.2	0.6	0.4	0.8	0.6	0.2	0	9.4	1	Yes	0.00897436	14.607	Prochlorococcus marinus str. MIT 9301	94.56	1144	coxB	cytochrome c oxidase subunit II	Energy Metabolism	Environmental	GATCATGTAAATAAAACATTTATTTAATACTATTATTTCCCTGGTTTTGCTATATCTTTTGGATTGGGTTTAATGTAAATTTGCTCCCAGAGGAAGCAAGTATTAATGCACCAATTTACGATGAGCTTTTAAAAATTCTTTTCATCATTGGACTAATTATTTTCATAGGAATGACAATAGCAGTTATTTATAGCTTATTTAAGTTTAGGAAAAGAAATGATCAGATAGGCGATGGTTTAGCTTTAGAGGGGAATTTAAGCTTAGAAATTGTCTGGACAATTATCCCTTCAATAATTGTTCTATTAATTGGTTTATATAGCTACAACATTTACGATCGAATGGGAGGGATGAAAGAACTAAATCATAACCACAAAATGATGAGTTCTAACACTGAAAAAA…	810
112742	JCVI_READ_1092301112742	1.33	0.33	0.33	0.33	0.67	0.33	0.33	0	0.67	0.33	1.67	0.33	0.67	1.67	3	0.67	0.67	1	1.67	0	0.67	0	0	0.67	0	0	0.33	0.33	0.67	1	19.67	0	NA	0.973894	1.1371	Prochlorococcus marinus MED4	85.97	916	cynA	cyanate transporter	Membrane Transport	Environmental	CATAGAATGCCGACCAATCGGTAATGATCATGAGAACTTCATGTCAGATATGCCTGATGACCCCGCTGAAATAATCTCAGATTTTCTAGGATGGGACTTATAAAAAATGAGGCTTATGAAATCGCTGATGCTATTTCAACAGCTGAAATGAGAGATCTTTTATTTTATAAAAATGCTTCAAATGGTGATCCATATAAAGAGGAGTTACTTAGAGAATTAGCTAAAGAGGCTGGAGGGTTAGATCAAGCCTTTCAAGCAGCATTTGGGCCTCAAGCAGGCAAATTTTTTGCTAAAACAAAAGCCTCTTCTCCAATGGGTAGAAGACAATTTTTATCCAGCTTGGCTGCAGGTGCAGCACTAATTACAGTTGCTTGTTCCAACCAAAATAAACCTGCTAAA…	1080
360820	HF_READ_05360820	0.4	0.2	0	0	0	0.2	0	0	0	0	0.6	0.2	0.4	1.4	0.8	0.6	0.8	0.6	0.2	0.4	0.4	0.2	0	0	0.4	0	0	0.2	0	0	8	0	NA	NA	NA	Prochlorococcus marinus MED4	82.89	355	cynA	cyanate transporter	Membrane Transport	Environmental	AAATGATTATTCCAGCTAGTAATTTTACTCAAAAATATAATTTTGAATGTAAAACCTCAGATCAGACTTCAGAAAATAATCCATCAAGTAATAACACATTTCTCAAAAATAATTTTTTAAACCCTTCAAACGATCATGGTTATTTTTGTGCCTGCATAGAATGTCGGCCAATAGGAAATGATCATGAAAATTTTATGGCAGACATGCCAGATGACCCTGCAGAAATAATTTCAGATTTCTCTAGAATGGGGCTCATCAAAAATGAAGCTTATGAAATTGCTGATGCTATTTCAACTGCAGAAATGAGAGATCTTTTATTTTATAAAAACGCTTCAAATGGTGATCCATACAAAGAACAATTGCTAAGAGAATTAGCTAAAGAAGCTGGTGGTTTAGATC…	744
953399	HF_READ_04953399	0.8	0.2	0.2	0	0	0.2	0.6	0	0.2	0.2	0	0	0	0.2	0.2	0.8	0.2	1	0.2	0	0.6	0	0.4	0.2	0.6	0	0	0.2	0	0.8	7.8	0	NA	NA	NA	Prochlorococcus marinus MED4	82.12	202	cynA	cyanate transporter	Membrane Transport	Environmental	AAATGTTCACTCCAGCTAGTAATTTTACTCAAAAATATAATTTTGAATGTAAAACTCCAGACCAGACTTCAGACAATAAAACATTTCTTAAAAATAACTTTTTAAATCCGTCAAATGATCATGGTTATTTTTGTGCATGCATAGAATGCCGGCCAATAGGAAATGATCATGAAAATTTTATGGCAGATATGCCAGATGACCCTGCTGAAATAATTTCAGATTTTTCTAGGATGGGGCTCATCAAAAATGAGGCTTATGAAATTGCTGATGCTATTTCAACTGCAGAAATGAGGGATCTCTTATTTTATAAAAACGCTTCAAATGGTGATCCATATAAAGAACAATTGCTTAGAGAATTAGCTAAAGAAGCAGGTGGTTTAGATCAAGCCTTTCAAGCAG…	509
568158	HF_READ_05568158	0.6	0	0	0	0	0	0.6	0	0	0	0	0	0	1.6	0.6	0	0	0	0	0.6	1	0	0	0	1	0	0	0	0	1	7	0	NA	NA	NA	Prochlorococcus marinus MED4	84.04	476	cynA	cyanate transporter	Membrane Transport	Environmental	TTAAATGATATTCAACTAGTAATTTCACTCAAAAATATAATTTCGAATGTAAAACTTCAGATCAAATTTCAGAGAATAATGCATCAAGTAATCAATTTCTTAAAAATAATTTTTTAAATCCATCTAACGATCATGGTTATTTCTGTGCATGCATAGAATGTAGGCCAATAGGAAATGATCATGAAAATTTTATGGCAGACATGCCAGATGACCCTGCTGAAATAATTTCAGATTTTTCTAGGATGGGCCTCATCAAAAATGAAGCTTATGAAATTGCTGATGCTATTTCAACTGCAGAAATGAGAGATCTTTTATTTTATAAAAATGCTTCTAATGGTGACCCTTACAAAGAGCAATTACTAAGAGAATTAGCTAAAGAAGCAGGTGGATTAGATCAAG…	812
6211	A9601_06211	0	0	0	0	0	0	0.67	0.17	0.17	0.33	0.5	0	0	0.17	0.5	0.67	1.33	1.17	1.5	0	0.17	0.17	0.17	0.5	0.83	1	1.83	0.33	0.17	0.17	12.52	1	NA	0.0008	16.3114	Prochlorococcus marinus str. AS9601	100	2682	dnaA	chromosomal replication initiator protein	Replication and Repair	Genomic	TTGCAAGCAACTAATCCTATTTGGGCGGAAGTTCAACAATCACTCCAAAAAACTTTAAGTAAGCCTTCATTTGAGACATGGATAAGGCCTGCTAAGTTTAATTGTTTTGAAAATGGCTTATTAACTTTAATCGCCCCAAATACATTTTCTAGTGATTGGTTGAGAAAGAATTATTGTGAAACTATTGAAAAAGCTGCGAAGGAAATCTGCGGTCATGATGTAAAAGTTGTTTTTAAATCTGAAACGAATACCAGCAGCGATTTATCAAATGAAGATAAAGCTAACGAAAAGAATGTTCATCATAAAACAAGATCTTTTTCTAGTAATAACCAAAATAATTCTTCAAAAAATCAATTCAAAAATCCTAATGGTTTAAATTTACGCTACGTCTTTAAAAGA…	1395
992392	HF_READ_04992392	0.33	0	0	0	0	0	0	0	1	0.33	0	0	0.33	0	0	1	1.33	0	0.33	0.33	2	0	0	0	1.33	0.33	1.33	1.33	0	0	11.3	0	NA	0.249279	8.21655	Uncultured Prochlorococcus marinus clone HOT0M-8E2	94.99	1193	dnaA	chromosomal replication initiator protein	Replication and Repair	Environmental	AATAAAATTTGCAGCATATCTATTGGGCGGAAGTTCAACAATCACTTCAAAAAACTTTAAGTAAGCCTTCATTTGAGACATGGATAAGGCTGCTAAATTTAATTGTTTTGAAAATGGCTTATTAACTTTAATTGCTCCAAATACATTTTCCAGTGATTGGTTAAGAAAGAATTATTGTCAAACTATCGAAAAGGCTGCAAAAGAAATATGCGGGCATGATGTAAAAGTTGTTTTTAAATCTGAAACAAATATTAGCGGCGATTCAACAAATAAAGGGAATCTAAATGAACAGATCGTGAATCATAAAACAAAATCATTTCCTAATAATAGTCAAGATATTTCTTCAAAAAATCGATCCAAAAATCCCAATGGTCTAAATCCGCGCTACGTCTTTAAAAG…	823
119098	HF_READ_05119098	0	0	0	0.17	0	0.17	0.17	0.33	0.33	0	0.5	0	0	0.17	0	0.83	1.33	0.33	0.5	0	0.17	0	0.17	0	0.5	1.17	1.17	0.67	0.5	0.17	9.35	9	NA	0.0134507	14.0726	Prochlorococcus marinus str. AS9601	96.66	1094	dnaA	chromosomal replication initiator protein	Replication and Repair	Environmental	GCCAGTGCCAAGCTTGCATGCCTGCAGGTCGACTCTAGAGGATCCCCATACACAGGAAGAATTTTTTACATACTTTTAACGCTCTTCACGAATCAGGAAGTCAAATAGTTATTGCAAGTGACAGACCACCAAATCAATTGTCGGGAATTCAAGAGAGATTAATTTCTAGGTTCTCAATGGGTATGACTGCAGATATACAACCACCTGACCTTGAGACGAGGACAGCCATCCTTCAAAAAAAGGCAGAACAAGAGAGGATGAGTCTTCCAAGAGATTTAATCCAATTTATAGCAGGAAGATTCACTTCGAATATTCGAGAGTTGGAAGGAGCATTTACTAGAGCAGTTGCATTTGCCTCAATAACAGGGTTGCCAATGACAGTTCAATCAATTGCTCCAA…	744
12218	HF_READ_05012218	0	0	0	0.17	0	0.5	0.17	0.17	0.67	0	0.17	0	0	0.83	0.17	0	0.67	0.83	0.33	0	0	0	0	0.17	0.17	0.33	1.5	0.5	0.83	0.17	8.35	1	NA	0.079788	11.1289	Prochlorococcus marinus str. AS9601	96.16	880	dnaA	chromosomal replication initiator protein	Replication and Repair	Environmental	GAACCCGGGCAGGTGCAGCTTGCATGCCTGCAGGTCGACTCTAGAGGATCCCCCTAGGTTCTCAATGGGTATGACTGCAGATATTCAACCGCCTGACCTTGAGACTAGGACAGCCATCCTTCAAAAAAAGGCAGAACAAGAGAGGATGAATCTTCCAAGGGATTTAATTCAATTTATAGCAGGAAGATTCACTTCGAATATTCGAGAGTTAGAAGGGGCATTTACTAGAGCAGTTGCATTTGCATCAATAACAGGCTTGCCAATGACAGTCCAATCAATTGCTCCAATGCTTGATCCGAATAGTGTTGGAGTTGTTGTTACTCCAAAACAAGTTATTAATAAAGTGTCAGATTTCTTTAAAGTTTCTACCGATGAATTGATAAGTTCAAGTAGGAGAAA…	632
93283	JCVI_READ_1095390093283	0.17	0	0	0	0	0	0.5	0	0	0	0.17	0	0	0	0	0.33	1.33	0	0.67	0.17	0.17	0	0	0	1.33	0	0.83	0.17	0	0	5.84	0	NA	NA	NA	Prochlorococcus marinus str. AS9601	91.52	862	dnaA	chromosomal replication initiator protein	Replication and Repair	Environmental	TTTTGCAAGCAACTAATCCTATTTGGGCGGAAGTTCAACAATCACTCCAGAAAACTTTAAGTAAGCCTTCGTTTGAGACATGGATAAGGCCTGCTAAATTTAATTGCTTTGAGAATGGCTTATTGACCTTAATAGCTCCAAATACATTTTCTAGTGATTGGTTAAGAAAGAATTATTGTGAAACTATCGAAAAAGCTGCAAAAGAAATTTGCGGCCATGATGTAAAAGTTGTTTTTAAATCTGAAACGAATACTATCAATGATTTAATAAATGAAGAGAGACAAAACGAACAAGACTTTAATTATAAAAAAAGATCTCTATCTAGTAGTAACCCAAACAATTCCTCAAAAAATCAATTTAAAAACCCTAACGGTTTAAATTTAAGATATGTCTTTAAAA…	720
829177	CAM_READ_0085829177	0.25	0.25	0	0	0	0.25	2	0.5	1.25	0.5	0.75	0	0	0.75	1.5	0.75	0.5	3.25	2	0	1	0	0.5	0	0.25	0.75	2	0	0.75	0.5	20.25	1	Yes	0.0216216	13.28	Prochlorococcus marinus str. AS9601	98.21	369	dnaA	chromosomal replication initiator protein	Replication and Repair	Environmental	CTAATAAATAGTTATTGCAAGTGACAGACCTCCAAATCAATTGTCGGGAATTCAAGAGAGATTAATTTCTAGGTTTTCAATGGGTATGACCGCAGATATTCAACCACCTGACCTTGAGACGAGGACAGCCATCCTTCAAAAAAAGGCTGAACAAGAGAGGATGAGTCTTCCAAGAGATTTAATTCAATTTATAGCAGGAAGATTCACTTCGAATATTCGAGAATTGGACAACTTGGGAAACTAAGGGGAAACATCTTAGAATGTAAAACGGGAAACAACCGGGACACCGGAGGAAACAAATTTTACGGGAAAGAAGGAACATTAAAACCTAGGGGAAACAATCTAAGCTCGCAAGCCAG	359
765782	HF_READ_04765782	0	0	0	0	0.33	0	0.17	1	0	0.17	0.83	0	0	0.67	0.83	1.33	0.83	1.33	1.5	0	0.5	0	0.33	0.67	0.33	1.17	2.5	0.33	0	0	14.82	9	Yes	0.038114	12.4067	Prochlorococcus marinus str. MIT 9301	95.5	460	dnaA	chromosomal replication initiator protein	Replication and Repair	Environmental	GCAGTGCAGGCTTGCATGCCTGCAGTCGACTCTAGAGGATCCCCATCCGAATAGTGTTGGAGTAGTTGTTACTCCAAAACAAGTTATTAAAAAAGTATCAGATTTTTTTAAAGTTTCTACTGATGAATTGATTAGTTCAAGTAGAAGAAAACCAGTAAGTCAAGCTAGGCAAATAGGCATGTATCTTATGCGACATGGAACAGATCTAAGCCTACCAAGAATTGGAGATGAGTTTGGTGGTAAAGACCATACAACAGTTATGTATGCTATTGAACAAGTTGAAAAAAAATTATCTATTGATCCTAATATTGCAAGTCAAGTTCAAAAAATAAGGGATTTACTTCAAATAGATTCAAGAAAAAATTTATAGTTTTACTGTTAAC	383
486600	HF_READ_05486600	0.2	0	0	0	0.2	0.2	0.6	0.6	0.4	0.6	0.8	0	0	0.6	0.6	0.4	0.2	0.4	1	0.2	0.4	0	0.4	0	0.4	1.2	1.6	0.2	0	0	11.2	9	Yes	0.0274396	12.9103	Prochlorococcus marinus str. MIT 9301	97.09	674	dnaA	chromosomal replication initiator protein	Replication and Repair	Environmental	ACCCGGCGGAAAGTGCCAGCTTGCATGCCTGCAGGTCGACTCTAGAGGATCCCCAGCATTTACTAGAGCTGTTGCATTTGCATCAATCACAGGCTTGCCAATGACAGTCCAATCAATTGCTCCAATGCTTGATCCGAATAGTGTTGGAGTAGTTGTTACTCCAAAACAAGTTATTAATAAAGTGTCAGATTTCTTTAATGTTTCTACCGATGAATTGATTAGTTCAAGTAGGAGAAAACCAGTAAGTCAAGCTAGGCAAATAGGCATGTATCTTATGAGACATGGAACGGATTTAAGTCTACCAAGAATTGGAGATGAGTTTGGGGGCAAAGACCATACAACAGTTATGTATGCTATTGAACAAGTTGAAAAAAAATTGTCTATTGATCCTAATATTGC…	470
43373	HF_READ_05043373	0	0	0	0	0	0	0.5	0.25	0.25	0.75	0	0	0	0.5	0	1	0.75	0.25	0.75	0	0	0.5	0.25	0.25	1.25	0.5	1.25	0.75	0	0	9.75	1	Yes	0.00393258	15.3839	Prochlorococcus marinus str. AS9601	94.25	743	dnaA	chromosomal replication initiator protein	Replication and Repair	Environmental	GCGCGGCGGGGCAGGTGCAAGCTTGCATGCCTGCAGGTCGACTCTAGAGGATCCCCATAAGGCCTGCTAAATTTAATTGTTTTGAGAATGGTCTATTGACCTTAACCGCTCCAAATACATTTTCCAGTGATTGGTTAAGAAAGAATTATTGTGAAACTATTGAAAACGCTGCAAAAAAAATCTGCGGCCATGATGTAAAAGTTGTTTTTAAATCTAAAACAAGTACCAGCAGCGATTTAACAACTGATGAGAAACCTAGCGAACAGAACTTTAAGCAAAAAACAAGATCTTTTTCTAATATTAACCAAAATAATTCTTCAAAAAATCAATTCAAAAACCCTAATGGTTTAAATTTACGCTACGTATTTAAAAGATTTGTTGTAGGTCCAAATAGTAGGT…	825
186555	CAM_READ_0236186555	0	0.5	1	0	0	0	0	0	0	1	0	0	0	0.5	0	1.5	0	1	0.5	0	0	0	0	0	0.5	0	1	0.5	0	0.5	8.5	0	NA	NA	NA	Prochlorococcus marinus str. AS9601	92.52	589	dnaE	DNA polymerase III subunit alpha	Replication and Repair	Environmental	GTTAACCTTAACCAAACTGCTAATTTTTAAAAGCTCTATTTTCCTGTTGCGTATATGGCGGCTCTTTTAAGTGTAAATTCTGGTTCGAAGCGACAAGATGCAAAGATATATTTCTAATTGTTATTCCATGGGAATAGAAGTTATTTCACCAAGCATTAATTTTTCTGGGGTTGATTTCACTATTAAAAATAAACAGATTTTTATTCGGACTGTCTGCAATTAAGAATTTAGGAGATTCCGCAATAAGAAATATAATTGAAAACCGAAATAGTTTTGGAATCTTTAAGTCATTATCGGATTTGTGCGATCGTTTGCCTACTAATGTTCTTAACAAAAGAAGTCTTGAATCTTTAATTCATTGTGGAGCACTAGATGAGTTCTCAAATGATAATAATAGAG…	471
619321	CAM_READ_0234619321	0.67	0	0	0	0	0.67	0.67	0.67	0.33	0.33	0.33	0.67	0	1.33	1.33	2	2	0.33	0.67	0.67	0.33	0.33	1.33	1	1.33	1	0.33	0	0.33	1	19.65	2	Yes	0.0389224	12.3673	Prochlorococcus marinus str. MIT 9312	90.95	579	dnaE	DNA polymerase III subunit alpha	Replication and Repair	Environmental	TTGTATCTCCTATAAGTATTTCACAGTTAGAAGAAACAAAAGATAGAACCAAGGTCTCTTTAGTCGGAATGATCCCTGATTTGAAACAAATCACAACAAGAAAGGGAGATAGGGATGGCTATAGTTCAACTTGAAGATCTTTCTGGAAGTTGCGAAGCAATTGTTTTTCCAAAAACTTATGTCAGATTATCAGAGTTTCTTTTGACGGATACTAGATTATTGTTATGGGGAACAATAGATAAAAAAAGTGATAAGACTCAATTAATAATTGATGATTGCAGAGAAATAGATAACCTTAAATTACTTATTATTAATCTTGAAAGTTCTCAAGCATCAGATGTGAGAGTACAAAATACATTAAGAGACTGTTTAGTCAAATTTAAGCCAGACAAAGATAAA…	499
9151	A9601_09151	0.2	0	0	0	0.2	0.2	0	0.2	0.8	0.2	0.4	0	0	1.2	1.6	1	1.2	0.6	0.4	0.2	0	0	1	0.4	0.6	0.8	0.6	0	0.4	0.6	12.8	4	Yes	0.0274519	12.9058	Prochlorococcus marinus str. AS9601	100	6720	dnaE	DNA polymerase III subunit alpha	Replication and Repair	Genomic	ATGGCTTTCGTTCCGCTTCATAATCATAGTGACTACAGCTTACTTGATGGTGCCAGTCAAATTTCAAAAATTGTAGAAAGAGCTTGTGATCTTGGGATGGATTCTATTGCTCTCACAGATCATGGAGTTATGTATGGTGTTCTTGATTTGGTCAAGAAGTGTAAAGAGAAAGGTATAAAGCCAATTATTGGTAATGAAATGTACGTTATTAATGGTTCTATTGATGATCCTCAACCAAAAAAAGAAAAAAGATATCATTTGGTGGTGCTAGCAAAAAATTATACTGGTTATAAGAATCTAGTGAAGTTGACAACAATTAGTCACCTAAACGGGATGAGAGGTCGAGGCATTTTTTCTAGGCCATGTATTGATAAATCTCTTTTAAGCAAATATAGTGAT…	3498
616571	CAM_READ_0234616571	0.5	0.25	0	0	0	0	0.5	0.25	0	0.25	0	0.25	0	0.5	1.25	2	0.5	0.25	0.25	1.25	0.25	0.25	0.25	0	1.25	0.25	1.5	0	0.25	0	12	2	Yes	0.0913725	10.8021	Prochlorococcus marinus str. MIT 9301	93.23	676	dnaE	DNA polymerase III subunit alpha	Replication and Repair	Environmental	AAATGATATAATAGAGCTCAGTTATTGTCAGATCTTGAACATGTTATTGAGTGGGCCTCTTCAAGAAATCGTGATAGATTATCAGGCCAAGGAAATCTATTTGACTCTAAAGAAGAATTTTCTAATCTTGCTTGTTCAGATTTACAATTAGCTAAGGTTGATGACTATTCACTTATTGAGAAATTAAAGTTAGAAAAACAGCTATTAGGCTTTTACTTATCTGACCATCCTCTAAAGCACTTAACTAAACCCGCAAAACTTGTATCACCTATAAGCATTTCGCAGTTAGAAGAAACAAAAGATAGAACCAAAGTCTCTTTAGTTGGAATGATCCCTGATTTAAAGCAAATTACAACTAGAAAAGGAGATAGGATGGCTATAGTCCAGCTTGAAGATCTT…	484
419184	JCVI_READ_1105333419184	1.4	1.2	1.6	0.6	1	1.8	1	0.8	0.8	2.2	3	1.2	4	4.2	6.6	5.2	2.6	5	7.6	1.4	7	5	8	7.4	4	0.8	2	0.8	1.2	3.8	93.2	0	NA	0.253236	8.1751	Prochlorococcus marinus str. MIT 9301	92.59	696	dxs	1-deoxy-D-xylulose-5-phosphate synthase	Metabolism of Terpenoids and Polyketides	Environmental	CAGCAACAGGACATCCAATTTCTGTTTTGATAGCCAAAGATGAGTCTGAATTACAGAGAATGTTAATAACTTCAATAAACCATAACGGTCCTACAGCACTAAGAATACCTAGAGGCTCGGGGTTAGGAGCGGCTGTAACGGATGAGGGTTGGGAACCTTTAAAAATAGGCGAAGCTGAAATACTTGAAGAAGGAGAAGATATTTTAATTATTGCTTATGGTTCAATGGTCGCATCAGCCATCCAAACAGCAAAGATACTAAAAAATATGAACATTAACGCATGTCTTATTAATGCAAGATTTGTGAAACCTCTCGATAAAAATCTTATTTTGCCTCTAGCAAGTAGGATTCAAAAAATTGTAACTATGGAAGAAGGAACCCTAATAGGTGGATTTGGAT…	633
237328	JCVI_READ_1103242237328	0.67	0.33	1.67	0.33	1.67	1.67	1	0.33	1	1	2.33	2	4.67	1.33	3.33	5	4	3.33	4.67	2.33	6.33	5	5.33	7.33	2.67	1	0.67	0.67	0	3.33	74.99	8	NA	0.186804	9.15102	Prochlorococcus marinus str. MIT 9301	95.89	1273	dxs	1-deoxy-D-xylulose-5-phosphate synthase	Metabolism of Terpenoids and Polyketides	Environmental	TCCACTCATCAGGAACTGGCTGCATGGGTAAGGTACTGGTTAGATTATTGCAAAAAAATATCCCTGATCAATATATTGATGTAGGAATAGCAGAACAACATGCAGTTACTCTTGCGGCAGGAACGTCTTGCGATGGTCTTAAACCTGTTGTAGCTATCTATAGTACTTTTCTTCAACGTGCTTTCGATCAATTAATTCATGATGTAGGAATACAAAATTTACCTGTATCATTCGTACTTGATAGAGCTGGGATAGTTGGAGCTGACGGTCCTACTCACCAAGGTCAGTACGATATCAGTTATATGAGATCTATACCTAATTTTGTATTGATGGCTCCAAAGGATGAGTCTGAATTACAGAGAATGTTAATAACTTCAATAAACCATAATGGTCCTACAG…	915
522465	HF_READ_05522465	0.25	1.25	1.25	0.75	0.75	1.25	0.5	0.5	0	0	0.25	1.5	1.25	1.75	2.5	0.5	0	0	3.75	4.25	2.5	1.75	5	2.75	0.5	0	0	1	1.5	1.5	38.75	11	NA	0.0148684	13.9107	Uncultured Prochlorococcus marinus clone HOT0M-7B6	94.22	1065	dxs	1-deoxy-D-xylulose-5-phosphate synthase	Metabolism of Terpenoids and Polyketides	Environmental	AAATGCTTTTAAGTGAGTTAAGTCATCCAAATCAACTTCATGGCTTAACAGTTTCACAATTAGAGGAAATTGCTTGTCAAATTAGAGAAAGACATCTTCAAGTAGTATCTACTAGTGGTGGACATCTTGGTCCTGGATTAGGTGTAGTTGAGCTGACATTGGCTTTATATCAAACTCTTGATCTTGATTTCGATAAAGTTGTTTGGGATGTAGGACATCAAGGTTATCCTCATAAATTAATAACTGGACGTTTCAGCCCAATTCGATTCTCTTAGACAACAAAATGGAGTAGCTGGATATCTCAAAAGAAGTGAAAGTAAATTTGATCATTTCGGTGCTGGACATGCAAGCACTTCTATTTCGGCTGCTTTAGGAATGGCAATAGCAAGAGATAGAAAA…	763
920114	HF_READ_04920114	0.5	1.25	1	2	1.25	1.25	1	0.25	0.25	0	0.25	1.25	1.25	0.75	2.25	0.5	0.5	0	1.5	2.5	2.25	1.25	2.75	1.75	1	0	0.25	0.5	0.75	3	33	6	NA	0.000869565	16.4748	Uncultured Prochlorococcus marinus clone HOT0M-7B6	93.66	1191	dxs	1-deoxy-D-xylulose-5-phosphate synthase	Metabolism of Terpenoids and Polyketides	Environmental	GAGTTAAGTCATCCAAATCAACTACATGGCTTAACAGTTTCACAATTAGAGGAAATTGCTTGTCAAATTAGAGAAAGACATCTTCAAGTAGTATCTACTAGTGGTGGACATCTTGGCCCTGGATTAGGTGTAGTTGAGCTTACATTGGCTTTATATCAAACTCTTGATCTTGATTTCGACAAAGTTGTTTGGGATGTAGGACATCAAGGTTATCCTCATAAATTAATAACAGGACGTTTCAGTCAATTTGATAGCCTTAGACAACAAAATGGAGTAGCTGGATATCTCAAAAGAAGTGAAAGTAAATTTGATCATTTCGGTGCTGGACATGCGAGTACTTCTATTTCTGCTGCTTTAGGAATGGCAATAGCAAGAGATAGAAAAGGTGAAAATTATAAA…	862
65772	JCVI_READ_1103359065772	1	0.5	0.5	0.5	1	2	1	0	0	1	1.5	1	1.5	1	3	1.5	0.5	0	1	1	0	0.5	3	1.5	0	0	0.5	0	0	1.5	26.5	6	NA	0.0795775	11.1275	Prochlorococcus marinus str. AS9601	92.54	821	dxs	1-deoxy-D-xylulose-5-phosphate synthase	Metabolism of Terpenoids and Polyketides	Environmental	TAAATGCTTTTAAGTGAGTTAAGTCATCCAAATCAACTTCATGGCTTAACAGTTTCACAATTAGAGGAAATTGCTTGTCAAATCAGAGAAAGACACCTTCAAGTAGTATCTACTAGCGGTGGACATCTTGGCCCTGGTTTGGGTGTAGTTGAGCTTACTTTGGCTTTATATCAAACTCTTGATTTAGATTTCGACAAAGTTGTTTGGGATGTAGGGCATCAAGGTTATCCTCATAAATTAATAACAGGACGTTTTAGTCAATTTGATACCCTTAGACAACAAAATGGAGTAGCTGGATATCTAAAAAGAAGTGAAAGTAAATTTGATCATTTTGGTGCTGGACATGCAAGCACATCTATTTCTGCTGCTTTAGGTATGGCAATAGCAAGAGACAGAAAA…	728
449987	JCVI_READ_1108839449987	0	0.33	0.67	0.67	0	2	0	0	0	0	1	0	0	1	0	1	0.33	1.67	0	2.67	0	4	5.67	3	0.33	0	0	0.67	0.33	0.67	26.01	5	NA	0.161394	9.49896	Prochlorococcus marinus str. MIT 9301	93.23	1025	dxs	1-deoxy-D-xylulose-5-phosphate synthase	Metabolism of Terpenoids and Polyketides	Environmental	TACGCTGAATGCTGTTCTCCTTGAGCAAGGAATGTCCTGGTGATGGTCTTAAACCTGTTGTAGCTATTTATAGTACTTTCCTTCAACGTGCTTTCGACCAATTAATTCATGATGTAGGGATACAAAATTTACCTGTATCGTTTGTTCTTGATAGAGCTGGGATAGTTGGGGCTGACGGTCCTACTCATCAAGGTCAGTACGATATCAGTTATATGAGATCTATACCTAATTTTGTATTGATGGCACCAAAGGATGAGTCTGAACTACAAAGAATGTTAATAACTTCAATTAACCATAATGGTCCTACAGCTCTAAGAATACCAAGAGGTTCTGGATTAGGAGTGGCTGTTATGGATGAGGGTTGGGAACCTTTGAATATAGGTGAAGCTGAAATACTTG…	843
9541	A9601_09541	0.33	1.33	0.33	0.17	0.33	0.67	0.33	0.17	0.33	0.17	0.83	1	0.33	0.83	1.83	1.33	0.33	0.17	0.67	1.83	2	1.17	3.17	1.33	0.83	0.17	0.17	0.5	0.5	2.17	25.32	11	NA	0.0850333	10.9378	Prochlorococcus marinus str. AS9601	100	3705	dxs	1-deoxy-D-xylulose-5-phosphate synthase	Metabolism of Terpenoids and Polyketides	Genomic	ATGCTTTTAAGTGAGTTAAGTCATCCAAATCAACTTCATGGCTTAACAGTTTCACAATTAGAGGAAATTGCTTGTCAAATTAGAGAAAGACATCTTCAGGTAGTATCTACTAGTGGTGGACATCTTGGTCCTGGATTAGGTGTGGTTGAGTTGACATTGGCTCTATATCAAACTCTCGATCTTGATTTTGACAAAGTTGTTTGGGATGTAGGACATCAAGGTTACCCTCATAAATTAATTACAGGACGTTTCAGTCAATTTGATTCTCTAAGGCAACAAAATGGAGTCGCTGGATATTTAAAAAGAAGTGAAAGTAAATTTGATCATTTTGGTGCTGGACATGCAAGTACATCTATTTCTGCTGCTTTAGGAATGGCAATAGCGAGAGATAGAAAAGGT…	1890
888589	HF_READ_04888589	0.17	1.5	0.33	1	0.83	1.33	0.17	0	0	0	0.67	1	1	1.83	0.33	0.83	0.33	0	3.33	1.33	1.67	1.17	1.5	1.33	0.5	0.17	0.33	0.17	0.33	1.17	24.32	5	NA	0.00775701	14.8488	Prochlorococcus marinus str. MIT 9215	95.17	529	dxs	1-deoxy-D-xylulose-5-phosphate synthase	Metabolism of Terpenoids and Polyketides	Environmental	AAATGCTTTTAAGTGAGTTAAGTCATCCAAATCAACTTCATGGCTTAACAGTTTCACAATTAGAGGAAATTGCTTGTCAAATTAGAGAAAGACACCTTCAAGTAGTATCTACTAGCGGTGGACATCTTGGCCCAGGTTTAGGTGTAGTTGAGCTTACATTGGCTTTATATCAAACTCTTGATCTAGATTTCGACAAAGTTGTTTGGGATGTAGGACATCAAGGTTATCCTCATAAATTAATAACAGGACGTTTTAGTCAATTTGATTCCCTTAGACAACAAAATGGAGTAGCTGGATATCTAAAAAGAAGTGAAAGTAAATTTGATCATTTGGGGATCCTCTAGAGTCGACCTGCAGGCATGCAAGCTAGCAACTGCC	378
776802	JCVI_READ_1093015776802	0.25	0.25	0.25	0	0.25	1	0	0	0.25	0.25	0.5	0	1.25	0.5	0.75	0.75	0.75	1	1	1.25	2	1.75	2	1.5	1.75	0.5	0.5	0.5	0	0.75	21.5	0	NA	0.249571	8.21922	Prochlorococcus marinus str. MIT 9301	96.08	1598	dxs	1-deoxy-D-xylulose-5-phosphate synthase	Metabolism of Terpenoids and Polyketides	Environmental	GAACCGTTTTGGAGGAGAGCCCATATGCAGAAGCTGATCAGGTTGGATATCATGCACAGTCTGCATTTGATCTTACAACTGGGAAATCTATTCCATCAAAGAAACCTAAACCTGTTAGTTATAGTAAAATATTCGGTCAAACCTTATTAAAAATATGTGAGCAAGATAGCAAAGTTGTTGGAATTACAGCTGCAATGGCTACAGGCACTGGTTTAGATATATTGCAAAAAAATATACCTGATCAATATATCGATGTAGGCATAGCAGAACAACACGCAGTTACTCTTGCAGCAGGAATGTCTTGCGATGGTCTTAAACCTGTTGTAGCTATTTATAGTACTTTTCTTCAACGTGCTTTCGACCAATTAATTCATGATGTAGGAATACAAAATTTACCTG…	1105
26350	HF_READ_05026350	0.5	1	0.75	0.5	0.25	0	0	0	0	0	0.5	0.25	0	1	2	0.5	0.5	0.25	1	0.75	1.75	0.5	1.5	0.75	0.25	0	0	0.5	1.25	1.75	18	11	NA	0.0698141	11.4086	Prochlorococcus marinus str. AS9601	92.3	979	dxs	1-deoxy-D-xylulose-5-phosphate synthase	Metabolism of Terpenoids and Polyketides	Environmental	ACCAACCGGCCGGGTGCCAGCTTGCATGCCTGCAGGTCGACTCTAGAGGATCCCCACTTCGATAAAGTTGTTTGGGATGTAGGACATCAAGGTTATCCTCATAAATTAATAACAGGACGTTTTAGTCAATTTGATTCCCTTAGACAACAAAATGGAGTAGCTGGATATCTCAAAAGAAGTGAAAGTAAATTTGATCATTTTGGTGCTGGACATGCAAGTACTTCTATTTCTGCTGCTTTAGGAATGGCAATAGCGAGAGATAGAAAAGGTGAGAATTATAAATGTGTCGCTGTTATTGGAGATGGAGCATTAACTGGAGGAATGGCATTAGAAGCTATAAATCATGCAGGTCACTTACCAAATACTCCTTTAGTTGTTGTTTTAAATGATAATGATATG…	777
617216	JCVI_READ_1103359617216	0	0.33	0.67	0	0	1	0	0	0	0	0.67	0	0.33	0.33	0.33	0	0.67	1	1	1	1	1.33	2.67	1	0	0.67	0	0.67	0.67	1.33	16.67	0	NA	0.446744	6.25542	Prochlorococcus marinus str. MIT 9301	92.42	1348	dxs	1-deoxy-D-xylulose-5-phosphate synthase	Metabolism of Terpenoids and Polyketides	Environmental	TAAGGGCTGCTGTTCTGTAGTCACAACCAAAGGTAAGGGATATCCTTATGCAGAAGCTGATCAAGTTGGATATCATGCACAGTCAGCATTTGATCTAACAACTGGGAAATCAATTCCATCTAAGAAACCTAAACCTGTTAGTTATAGTAAAATATTTGGTCAAACCTTATTGAAAATATGTGAACAGGATAGCAAAGTCGTTGGTATTACAGCAGCAATGGCTACAGGGACTGGTTTAGATATATTGCAAAAAAATATTCCAGATCAATATATCGATGTAGGAATAGCAGAACAACATGCAGTTACTCTGGCGGCAGGAATGTCTTGTGATGGTCTTAAACCTGTTGTAGCTATTTATAGTACTTTTCTACAACGTGCATTTGATCAATTGATTCATGA…	1130
718346	JCVI_READ_1108799718346	0.33	0.67	0.33	0	0	0.33	0.33	0.33	0	0	1	0.67	0.33	0.67	1	0.67	0	0	0.33	1.67	1.33	0.33	1.33	1	0	0	0.33	0.33	1.33	1	15.64	11	NA	0.197107	9.00436	Prochlorococcus marinus str. MIT 9301	89.92	739	dxs	1-deoxy-D-xylulose-5-phosphate synthase	Metabolism of Terpenoids and Polyketides	Environmental	CAATGCTTTTAAGTGAGTTAAACCATCCTAATGAACTACATGGTTTAACAGTTTCACAATTAGAAGAAATTGCCTGTCAAATTAGAGAAAGACATCTACAAGTTGTCTCTACCAGTGGCGGACACCTTGGTCCTGGATTAGGTGTAGTCGAGTTAACATTAGCTTTATATCAGACTCTTGATCTTGATTTTGACAAGGTTGTATGGGATGTAGGTCATCAAGGTTATCCCCATAAATTAATAACAGGTCGTTTTAGCAATTTTGATTCTCTTAGGCAACAAAATGGTGTAGCAGGCTATCTTAAAAGAAGTGAAAGTAAATTTGACCATTTTGGTGCAGGTCATGCAAGTACCTCTATTTCCGCTGCTTTAGGCATGGCAATAGCAAGAGATAGAAAAG…	652
791844	HF_READ_04791844	0	0	0.17	0.17	0.17	0.5	0	0.33	0.17	0.17	0.33	0	0.67	0.33	1.33	1.33	0.67	0.17	1.5	0.33	1.17	0.67	1.17	1	0.17	0.67	0.33	0.33	0.17	0.67	14.69	0	NA	0.358195	7.09051	Prochlorococcus marinus str. MIT 9301	94.61	1227	dxs	1-deoxy-D-xylulose-5-phosphate synthase	Metabolism of Terpenoids and Polyketides	Environmental	AGAAACCTAAACCTGTTAGTTATAGTAAGATATTTGGTCAAACCTTATTAAAAATATGTGAACAAGATAGCAAAGTCGTTGGTATTACTGCCGCAATGGCTACAGGTACTGGTTTAGATATATTGCAAAAAAATATCCCTGATCAATATATCGATGTAGGAATAGCAGAACAACATGCAGTTACTCTTGCGGCAGGAATGTCTTGCGATGGTCTTAAACCTGTTGTGGCTATTTATAGTACCTTTCTTCAACGAGCGTTCGATCAATTAATTCATGATGTTGGTATCCAAAATTTACCTGTATCGTTCGTACTTGATAGGGCCGGGATAGTTGGAGCTGACGGTCCTACTCACCAAGGTCAATACGATATCAGTTATATGAGATCGATACCTAATTTTG…	866
490866	HF_READ_05490866	0	0.2	0	0.6	0.2	0.4	0	0	0	0.4	1	0	0.4	0.4	0.6	1.4	0.6	0	0.6	0.4	0.4	0.4	0.6	0.2	0.6	0.6	0.4	0.2	0	0.6	11.2	0	NA	0.726162	3.85907	Uncultured Prochlorococcus marinus clone HOT0M-7B6	93.26	1176	dxs	1-deoxy-D-xylulose-5-phosphate synthase	Metabolism of Terpenoids and Polyketides	Environmental	TTTAATTGGTAAGGATATTCCGGAAGAACTAAAAAATATTAAAGGAAGTGTTAGACGACTAGCCGTGCCTAAGGTTGGTGCTGTTTTGAAGAACTTGGATTTACATATATGGGTCCAATTGATGGTCATGATATTGGAAATTTAGTTAATACTTTTAACGCTGCTCATAAACTTAAAAAACCTGTGCTTGTTCATGTTGTTACAACAAAAGGTAAAGGTTACCCTTATGCAGAAGCTGATCAGGTTGGATATCATGCACAGTCTGCATTTGATCTGACAACTGGAAAATCAATTCCATCTAAGAAACCTAAGCCTGTTAGTTATAGTAAAATATTCGGTCAAACCTTATTGAAAATATGTGAACAAGATAGCAAAGTCGTTGGAATTACAGCAGCAATG…	893
235274	JCVI_READ_1103242235274	0	0	0.33	0.67	0.33	0	0	0	0	0	0.67	0	0	0.33	1	0.67	1.33	0.33	0.33	0.67	1.33	0	2.33	0	0.33	0	0	0	0	0.33	10.98	0	NA	0.398882	6.67731	Uncultured Prochlorococcus marinus clone HOT0M-7B6	93.01	1116	dxs	1-deoxy-D-xylulose-5-phosphate synthase	Metabolism of Terpenoids and Polyketides	Environmental	TTAAGCTGAGCGCAGCATGGCTACAGGAACTGGTTTAGATATATTGCAAAAAAATATCCCAGATCAATATATCGATGTTGGAATAGCAGAACAACATGCAGTTACTCTTGCTGCGGGAATGTCGTGCGATGGTCTTAAACCTGTTGTAGCTATTTATAGTACTTTTCTTCAACGTGCATTCGATCAATTAATTCATGATGTAGGAATCCAAAATCTACCTGTTTCGTTCGTACTTGATAGAGCTGGGATAGTTGGAGCTGACGGTCCTACTCACCAAGGTCAGTACGATATCAGTTATATGAGATCTATACCTAATTTTGTATTGATGGCGCCTAAAGATGAGTCTGAATTACAGAGAATGTTAATAACTTCTATTAATCATAATGGTCCTACAGCGCT…	928
562380	HF_READ_05562380	0	0	0.5	1	0.25	0.75	0	0	0.25	0	0.5	0	0.25	0.5	0.25	0.25	0.25	0	0.5	0.25	0.5	0.5	0.75	0.5	0	0	0	0.5	0	0.25	8.5	0	NA	NA	NA	Uncultured Prochlorococcus marinus clone HOT0M-7B6	90.36	565	dxs	1-deoxy-D-xylulose-5-phosphate synthase	Metabolism of Terpenoids and Polyketides	Environmental	CCCCGACACAAGGGTGAATTTAAGTGTGTGCTCTTTGGGAGGGCCTATCTGGAGAATGCCTTTAGAGCTTAATCTCCCCGGCCCCCTTCCCAATCTCCTTTTAGTGGTTATTAAAGGTAAGGATAAGTTATTCACCTCCAGTGGAGTTTTTTCTTTTACTAAATAGGTAAGGGTTAGTCCTCCATTGCAATTTTTATCCGATAGTGTTCAAGAAAGGGTAAAAAAATATTCCCTTAATTGGTAAGGATATCCCAAGAAGGAGTTAAAAAAATATTAAAGGAAGGCGTAGACGATTGGCTGTGCCTTAAGGTTGGGTGCTGTTTTTTGAAGAACTTTGGATTTACATATATGGGTCCAATTGACGGTCATGATATTGGAAACTTAGTTAATACTTTTAAC…	771
42773	HF_READ_05042773	0.25	0	0.25	0	0.75	0	0.25	0	0	0	0	0	0.25	0.75	0.25	0	0.75	0.25	0	0.25	1	0.5	1	0.75	0.25	0	0	0.25	0	0.5	8.25	0	NA	NA	NA	Prochlorococcus marinus str. AS9601	92.41	955	dxs	1-deoxy-D-xylulose-5-phosphate synthase	Metabolism of Terpenoids and Polyketides	Environmental	ACCAGGGGCAAGCTTGCATGCCTGCAGGTCGACTCTAGAGGATCCCCACCTGTTGTAGCCATTTACAGTACTTTTCTCCAACGTGCTTTTGATCAATTAATTCATGATGTGGGGATACAAAATTTACCTGTATCGTTTGTACTTGATAGAGCCGGGATTGTTGGAGCTGACGGTCCTACTCACCAAGGTCAGTACGATATCAGTTATATGAGATCTATTCCTAATTTTGTATTGATGGCGCCAAAAGATGAGTCTGAATTGCAGAGAATGTTAATAACGTCAATTAACCACAAGGGTCCTACAGCTCTGAGAATACCAAGAGGTTCTGGATTGGGGGTTGCCGTAATGGATGAGGGTTGGGAACCTTTGAATATAGGCGAAGCTGAAATTATTGAAGAA…	837
771560	JCVI_READ_1092963771560	0	0	0	0.2	0	0	0	0.2	0	0	0	0	0.6	0	1.2	0.8	0	0.2	0.6	0.4	0.8	0.2	0.6	0.8	0	0.4	0.4	0	0.2	0.4	8	0	NA	NA	NA	Prochlorococcus marinus str. MIT 9301	92.67	1443	dxs	1-deoxy-D-xylulose-5-phosphate synthase	Metabolism of Terpenoids and Polyketides	Environmental	TCCTGAACGCTGCTCATAAACCTTAAAAAACCTGTACCTTGTTCCATGTTGTTACAACAAAAGGGAAGGGATATCCTATGCAGAAGCTGACCAGGTAGGATATCATGCGCAGTCTGCATTTGATCTGACTACTGGAAAATCTATTCCATCAAAGAACCTAAGCCTGTTAGTTATAGTAAAATATTTGGTCAAACTTATTGAAAATATGTGAACAAGATAGCAAAGTCGTTGGCATTACAGCTGCAATGGCTACAGGTACTGGTTTAGATATATTGCAAAGAAATATTCCAGACCAATACATAGATGTAGGAATAGCAGAACAACATGCCGTTACTCTTGCTGCAGGAATGTCATGCGATGGTCTCAAACCTGTTGTAGCTATTTATAGTACTTTTCTTC…	1142
259313	JCVI_READ_1092257259313	0	0.5	0.5	1.5	3.5	19.5	1.5	0	0.5	0.5	0	0	2	24	38.5	21	3	3	0.5	0	1	1	5.5	17	14.5	1.5	1.5	0	0	2.5	164.5	4	Yes	0.00309859	15.6758	Prochlorococcus marinus str. MIT 9301	90.86	426	psbA	photosystem II PsbA protein (D1)	Energy Metabolism	Environmental	GTACCGCCTGGCAGACACTGAGACAGAATCTCAGAACTATGGTTACAAGTTCGGACAAGAAGAAGAGACATACAACATCGTAGCAGCACACGGTTACTTTGGTAGACTTATCTTCCAATATGCGTCATTCAACAACTCAAGAAGTCTTCACTTCTTCCTCGCAGTATTCCCAGTGGTCTGCGTATGGTTAACATCTATGGGTATTTGCACAATGGCATTTAACCTAAATGGATTTAACTTCAACCAGTCAGTTGTAGATGCAAATGGTAAAGTTGTTCCTACATGGGGTGACGTTCTTAACAGAGCAAACCTAGGTATGGAAGTAATGCACGAGCGTAACGCTCACAACTTCCCATTAGACTTAGCATCTGCTGAGACTACAGAAGTTGCATTAACAGC…	476
537204	HF_READ_05537204	0	0.17	0	0.5	0.17	0.33	0	0	0	0	0.5	0	0.17	0.17	0.17	0.33	0.33	0.33	0.17	0.5	0.33	0.17	0.67	0.5	0.17	0.17	0.17	0.33	0	0	6.35	0	NA	NA	NA	Prochlorococcus marinus str. MIT 9301	93.08	1102	dxs	1-deoxy-D-xylulose-5-phosphate synthase	Metabolism of Terpenoids and Polyketides	Environmental	GCGGGTGCCAGCTTTGCATGCCTGCAGGTCGACTCTAGAGGATCCCCGACATGATATTGGAAATTTAGTTAATACTTTTAACGCTGCTCACAAACTTAAAAAACCTGTACTTGTTCATGTTGTTACAACAAAAGGTAAGGGTTATCCTTATGCAGAAGCTGATCAGGTTGGATATCATGCACAGTCAGCATTTGATCTAACAACTGGTAAATCTATTCCATCTAAGAAGCCTAAACCTGTTAGTTATAGTAAAATATTTGGACAAACCTTATTGAAAATATGTGAACAAGATAGCAAAGTTGTTGGTATTACAGCGGCAATGGCTACAGGGACTGGTTTAGATATATTGCAAAAAAATATTCCAGATCAATATATCGATGTTGGAATAGCAGAACAACA…	860
272997	JCVI_READ_1108829272997	0.67	0	0.67	0.33	0.67	1.67	0.33	0	0	0	1	0.67	1.67	0.33	2.33	1.33	0.33	0.67	4	1	5	1	3	3.67	0.33	0	0.67	0.33	1	4.33	37	11	Yes	0.0725641	11.3309	Prochlorococcus marinus str. MIT 9215	93.16	505	dxs	1-deoxy-D-xylulose-5-phosphate synthase	Metabolism of Terpenoids and Polyketides	Environmental	TAATGCTTTTAAGTGAGTTAAGTCATCCTAATCAACTACATGGCTTAACAGTCTCACAATTAGAAGAAATTGCTTGCCAAATAAGAGAAAGACATCTTCAAGTTGTATCCACAAGTGGCGGACATCTTGGACCTGGATTAGGTGTTGTTGAGTTGACATTGGCTTTATATCAAACTCTTGATCTAGATTTGGACAAAGTTGTTTGGGATGTAGGACATCAAGGTTATCCTCATAAATTAATCACAGGACGTTTCAGTCAATTTGATTCCCTTAGACAACAAAATGGAGTGGCTGGATATCTCAAAAGAAGTGAAAGTAAGTTCGATCATTTTGGTGCAGGTCATGCAAGCACATCTATCTGCTCAGCCGTCAA	373
319209	JCVI_READ_1103769319209	0	0.2	0.2	0.6	0.2	1	1	0.2	0	0.2	0.8	0	0.8	1.8	1	0.8	1.4	0.6	0.4	1.6	1.4	0.6	1.6	2.6	0.6	0.4	0.6	0.2	0.6	1.4	22.8	7	Yes	0.0657576	11.5348	Prochlorococcus marinus str. AS9601	91.29	1134	dxs	1-deoxy-D-xylulose-5-phosphate synthase	Metabolism of Terpenoids and Polyketides	Environmental	GTAGTGAATGACTGAACTGGGAATCTATTCATCAAAGAAACCTAAGCCCGTTAGTTATAGTAAAATATTTGGTCAAACCTTATTGAAGATATGTGAACAAGATAGCAAAGTTGTTGGTATAACAGCAGCAATGGCCACAGGTACTGGTTTAGATATATTGCAAAAAAATATACCAGATCAATATATCGATGTAGGAATAGCAGAACAACATGCAGTTACTCTTGCGGCAGGAATGTCGTGCGATGGTCTTAAACCAGTTGTAGCTATTTATAGTACTTTTCTCCAACGTGCTTTCGATCAATTAATTCATGATGTAGGGATACAAAATTTACCTGTATCGTTTGTACTTGATAGAGCTGGGATAGTTGGTGCTGACGGTCCTACTCATCAAGGTCAGTA…	1010
544371	HF_READ_05544371	0.4	0	0	0	0.4	0.2	0.6	0.2	0	0.4	0.8	0.4	1.4	1.8	1	2.6	1	1.2	0.4	0.6	0.4	1	2.8	0.8	0.4	0.2	0	0.2	0.4	1.8	21.4	8	Yes	0.234292	8.43456	Uncultured Prochlorococcus marinus clone HOT0M-7B6	94.05	1195	dxs	1-deoxy-D-xylulose-5-phosphate synthase	Metabolism of Terpenoids and Polyketides	Environmental	TCCGTGCCAAGCTTGCATGCCTGCAGGTCGACTCTAGAGGATCCCCCTGGTTTAGATATATTGCAAAGAAATATTCCAGATCAATATATAGATGTTGGAATAGCAGAACAACATGCAGTTACTCTAGCTGCAGGGATGTCGTGCGATGGTCTAAAACCTGTTGTAGCTATTTATAGTACTTTTCTTCAACGTGCTTTCGATCAATTAATTCATGATGTAGGGATACAAAATTTACCTGTATCATTCGTGCTTGATAGGGCTGGGATAGTAGGAGCTGACGGTCCTACTCACCAAGGTCAGTACGATATCAGTTATATGAGATCAATACCTAATTTTGTTTTGATGGCCCCAAAAGATGAGTCTGAATTACAGAGAATGTTAATAACGTCAATAAACCAT…	907
111299	HF_READ_05111299	0.4	0.4	0.2	0	0.6	0.4	0.2	0	0	0	0.2	0.4	0.2	0	1	0.4	0.2	0	1.2	1	1	0.4	1.2	1.2	0	0.2	0.6	0.2	0.6	1.8	14	11	Yes	0.0834007	10.9899	Uncultured Prochlorococcus marinus clone HOT0M-7B6	93.01	654	dxs	1-deoxy-D-xylulose-5-phosphate synthase	Metabolism of Terpenoids and Polyketides	Environmental	AAATGCTTTTAAGTGAGTTAAGTCATCCAAATCAACTTCATGGCTTAACAGTTTCACAATTAGAAGAAATTGCATGTCAAATTAGAGAAAGACATCTACAAGTAGTATCTACTAGTGGTGGACATCTTGGGCCTGGATTAGGTGTAGTTGAGCTTACATTAGCTTTATATCAAACCCTTGATCTTGATTTCGATAAGGTTGTTTGGGATGTAGGACATCAAGGTTATCCTCATAAATTAATAACAGGACGTTTTAGTCAATTTGATTCCCTTAGACAACAAAATGGAGTCGCGGGATATCTCAAGAGAAGTGAAAGTAAGTTTGATCATTTTGGAGCTGGACATGCAAGTACTTCTATATCTGCTGCTTTAGGAATGGCAATAGCAAGAGATAGAAAAG…	507
843356	JCVI_READ_1103769843356	0.8	0.2	0	0.2	0.2	0.2	0	0	0	0.4	0.2	0	0.2	1.6	0.4	1	0.2	0	1.8	0.2	1	1.8	4	2.8	0.4	0	1.6	1.2	0.4	1.4	22.2	0	NA	0.297752	7.66528	Prochlorococcus marinus str. MIT 9312	92.13	686	elaC	ribonuclease Z	Translation	Environmental	GTTTTAGGTTTTTCTATTTGATGTCGATCGAAATGGTCTCTTTTTTTTCATCACTTAATAAGTCTTTCAAAAGACTTCTTATTTTTCTTCCATTGATTATTGGTTTACTTCTTAATCCAATTTCTGCTTATGCACTTTATCCTAGTGATCCTTCATCAGTAGATGGATTGAAAGAAGATCTTCATGGAGCAGATCTTCAAAATAATGAATTTGTAAAATATGATTTATCTTATCAAGATTTAGGAGAGGCTAATCTACAAGGGGCCTATATGAGCGTTACAACAGCAAAGAATTCTAGTTTCAAAAGCGCAAACATGAAAGATCTTATTGCATATGCTGTACGTTTTGATAATGCTGATTTATCTGATGCGAATCTTACAAATGGTGAGCTAATGAAAA…	763
430543	HF_READ_05430543	0.67	0	0	0	0	0	0	0	0.17	0.67	0	0.17	0	0	0.17	0.67	0	0.67	0.83	0.17	0.33	0	0	0	0.5	0.67	1.17	0	0.17	0.5	7.53	0	NA	NA	NA	Prochlorococcus marinus str. AS9601	96.65	615	elaC	ribonuclease Z	Translation	Environmental	AAGTGAATATCACCTTTTTAGGAACAAGTTCAGGGGTCCCATCCTTAACAAGAAATGTTTCTTCACTAGCACTTAAATTATCACAATCATCAGAAGTTTGGCTTTTTGATTGTGGAGAGGGAACGCAACATCAAATAATGAAAAGCAATATTAAATCTTCACAAATCAAGAAAATATTTATTACACATATGCATGGTGATCATATTTATGGTTTACCTGGACTTTTGGCTACCTTAGGTTTATCAGGCAATAGTGAGGGTATTGAAATTTACGGTCCTTCAGAGTTGAGAAGTTTTATAAATTCAGCACTTAAAAGTAGTTTTTGCAAATTGTCATTCCCATTACATTTTGTGGAAGTAGAAAATTTTGCATCAAAAAATAAAAATTTATTTGAAAACA…	486
944253	HF_READ_04944253	0.17	0	0.17	0	0	0	0	0	0	0.33	0.17	0.33	0.5	0.67	0.17	0.17	0	0.17	0.17	0	0.17	0.33	0.17	0	0.67	0.17	0.83	0.83	0	0.33	6.52	0	NA	NA	NA	Prochlorococcus marinus str. MIT 9301	93.8	825	elaC	ribonuclease Z	Translation	Environmental	GCAGGGTGGCCAAGCTTGCATGCCTGCAGGTCGACTCTAGAGGATCCCCCACTTAAAAGTAGTTTTTGCAGATTGACATTCCCATTGCATTTTGTGGAAGTTGAAAATTTTGCATCAAAAAATAAAATTTTATTTGAAAACAACAAAATAAAAGTAAATTGCGCCTGCCTTAAACACAAAATACCTGCTTATGGTTATAGGGTGAGTGAAAAAGATAAACCAGGTATATTTGACATCAAAAAAGCAGAGTCTCTAAAAATAGCACCTGGACCAATTTATTCAGAACTGCAACAAGGTAAAAAAGTCGTATTGGCTGATGGGAGGGCGTTTGATGGGAAAGAATTCTGCGGACCACCTAGAGGGGGGAAAAGTTTTGTTTATTGCACAGATACAGTCTTT…	763
917058	HF_READ_04917058	0	0	0	0.25	0	0	0.5	0	0	0.25	0	0.25	0.25	0	0.5	0.75	0	0.25	0.5	0.25	0.25	0	0.25	0	0.5	0	0.25	0	0	0.5	5.5	0	NA	NA	NA	Prochlorococcus marinus str. MIT 9301	93.9	916	elaC	ribonuclease Z	Translation	Environmental	CTTAATATCTCACGCAGTGCGGCTTGCATGCCTGCATTCGACTCTAGAGGATCCCCCTGATAATAAAACTCTATTTGAAAATCACAAAATAAAAGTAAATTGCGCATGCCTTAAACATAAAATACCAGCCTATGGTTATCGAGTTAGCGAAAAAGATAAGCCAGGTATATTTGATATCAAAAAAGCAGAGTCTTTAAAAATAGCACCTGGACCAATTTATTCAGAACTGCAACAAGGTAAAAAAGTAATATTAGCTGATGGTAGGACATTTGATGGGAAAGAATTCTGTGGACCTCCTAGAGAGGGTGAGAGTTTTGTTTATTGCACAGATACTATCTTTAGCGAATCAGCTGTTTCACTATCAAAAAATGCCGATTTACTCGTACATGAATCGACTTT…	704
15081	A9601_15081	0.33	0	0.5	0.5	0	0.83	2	1.17	1.5	1.83	2.17	0	0.17	1.83	3.5	6.67	6	9.83	6	0.67	0.67	0.83	0	1	7.83	2.5	6	1.17	1	4	70.5	1	NA	0.0057	15.1166	Prochlorococcus marinus str. AS9601	100	2212	ftsZ	cell division protein FtsZ	Cell cycle	Genomic	ATGAGCTTCGGTAACAATCCAAACTTTGATCAATCGAGAGAAATCCTTCCAAGCCAAAACGCCAAAATAGAAGTTATTGGTGTAGGTGGTGGTGGCAGTAATGCAGTCAATAGAATGATAAATAGTGATTTAGAAGGTGTTTCATTTAGAGTCCTCAATACAGATGCACAAGCCCTACTACAATCTTCTGCAGAAAGTAGAGTTCAACTTGGACAAAACCTCACTAGAGGTTTAGGTGCAGGAGGGAATCCAAGTATTGGACAAAAAGCAGCCGAAGAATCCAAAGAAGAACTTCAACAAGCTTTAGAGGGATCTGATCTAGTTTTTATAGCCGCTGGAATGGGTGGAGGAACTGGCACAGGTGCAGCTCCCGTTGTCGCAGAAGTAGCAAAACAAAGT…	1116
371686	JCVI_ORF_1105094371686	0	0.2	0.2	0	0.2	0.2	0.6	0.6	0.6	0.2	0.6	0	0	1.4	2.4	2.2	3.2	2.2	2.6	0.2	1	0.2	0.6	1.2	1	0.8	2	1.2	0.2	0.6	26.4	1	NA	0.00430108	15.2828	Prochlorococcus marinus str. MIT 9301	92.56	430	ftsZ	cell division protein FtsZ	Cell cycle	Environmental	GCAGGCTGCACTGCATGAGCCCCCTTCAGAAGCATTTAAGAATGCTGATGATGTTCTAAGGATGGGAGTCAAAGGCATTAGTGACATAATTACTTGCCCAGGATTAGTGAATGTTGATTTTGCAGACGTAAGATCGGTTATGACGGAAGCTGGCACAGCTCTTCTAGGAATAGGGATAGGTTCAGGAAGATCGAGAGCTATAGAGGCAGCACAGGCAGCAATGAATAGTCCTCTATTAGAAGCAGCTAGGATTGATGGAGCCAAAGGCTGCGTCATAAATATTACCGGTGGTAAAGACATGACTTTAGAAGATATGACCTCCGCATCTGAAATTAT	336
140292	JCVI_ORF_1105099140292	0.17	0	0	0.17	0	0.17	0.17	0	0	0.33	0	0	0	0.5	0.17	0.67	0.83	2.33	0	0.83	0.67	0	0.33	1.33	1.33	0.17	2	0.17	0.17	0.33	12.84	1	NA	0.197532	9.00532	Prochlorococcus marinus str. MIT 9301	94.5	759	ftsZ	cell division protein FtsZ	Cell cycle	Environmental	CCGGTACGGTTGGGAGCTATGATGGGGAGTCAAGGCATTAGTGACATAATTACTTGCCCTGGATTAGTTAATGTTGATTTTGCAGATGTAAGATCAGTTATGACTGAAGCTGGCACTGCTCTCCTCGGAATAGGCATAGGTTCAGGTAGATCGAGAGCTATAGAGGCAGCACAGGCAGCAATGAATAGTCCTTTATTAGAGGCTGCCAGAATTGATGGAGCTAAAGGCTGTGTTATAAATATTACTGGTGGCAGAGACATGACTCTAGAAGACATGACCTCTGCATCTGAAATTATTTATGATGTTGTTGATCAAGAAGCAAATATTATTGTTGGTGCAGTAGTCGATGAGGCAATGGAAGGGGAAATACAAGTTACTGTAATTGCTACAGGATTTGAA…	534
305868	JCVI_ORF_1105081305868	0	0	0.25	0	0	0	0.25	0	0	0.5	0	0	0	0.25	0.25	1.25	0.25	0	0	0	0	0	0	0	1	0	0.25	0.75	0	0	5	0	NA	NA	NA	Prochlorococcus marinus str. MIT 9215	88.38	922	ftsZ	cell division protein FtsZ	Cell cycle	Environmental	ATGAGCTTCGGTAACAATCCAAACTTTGATCAATCGAGAGAAATCCTTCCAAGTCAAAACGCCAAAATAGAAGTTATTGGCGTTGGTGGCGGTGGAAGTAACGCAGTTAACAGAATGATAAATAGTGATTTAGATGGCGTATCATTTCGAGTCCTCAATACTGATGCACAAGCACTTCTACAATCTGCTGCAGAGAGCAGAGTTCAACTAGGGCAAAACCTTACAAGAGGGCTGGGAGCCGGAGGAAATCCAAGTATTGGGCAAAAAGCAGCAGAAGAATCCAAAGAAGAGCTTCAACAAGCTTTAGAGGGCTCTGATTTAGTTTTTATAGCAGCTGGAATGGGCGGTGGGACAGGAACGGGTGCAGCTCCTGTAGTAGCAGAAGTTGCCAAACAAAGC…	888
977993	HF_READ_04977993	2	1.8	1.4	0.8	0.4	1	1.6	1.2	2	2.6	4.2	1.6	0.6	1	3	5	4.6	5.4	12.6	3.6	3	2.4	4.4	3.4	4.2	2.6	8.6	7	1.4	4.2	97.6	9	NA	0.00390805	15.4272	Prochlorococcus marinus str. MIT 9312	96.86	662	fur	Fur family transcriptional regulator; Ferric uptake regulator	Transcription	Environmental	TTTTGTCATTATCTTCGCAATACAATGTCATTACATCCCCTCTTGGTGATGGTTTACATAAAGATGGGAAAAGGTTAACTCCTCAGAGGCTAAAGGTTCTTAATTTATTTGAAAATATTGGCTCTGGAAAGCATCTTAGTGCTGAAGAGGTTCATGAAAAGTTAGTTAAAACAAGCTCCAAAGTTTCACTAGCAACAATTTATAGAACTTTAAGACTTTTGGTTCAAATGGGTTTGCTTCATGAATTAGAACTCATTGAGGGTGGACACAGATATGAATTGCTAAGTAACGACACACCGGATCATCATCATTTGATTTGTATTAGGTGTGGAAGAACAGAAGAATTCGAAAATGACGAAGTTTTAGAAGCAGGCAAAGTTGCAGGGGATCCTCTAGAGT…	432
930016	HF_READ_04930016	1.17	0.33	0.67	0.17	0.17	0.33	1.17	0	1.17	0.33	0.33	0.33	0	2	2.5	3.5	1.67	1.67	4	2.5	2.33	0.83	0.5	2.83	1.33	1.17	2.33	2.67	0.5	1.5	40	1	NA	0.212971	8.73962	Prochlorococcus marinus str. MIT 9215	88.37	331	fur	Fur family transcriptional regulator; Ferric uptake regulator	Transcription	Environmental	GTATGATCAAAAATACGAGACAAAAAAAGATTTTGGAAACAATGGTAACTAAGTCTGACATTACCAAAAGACAAGAACAACTTCTTGAAGAACTTAATAAATGTGAGGATGAATTGAGCGGTCAAGAATTGCATAGGCAGTTGATCAAAAAAGGCAAATCTATGGGGTTGACCACTGTTTATAGAAATCTGCAAATCTTGATAAAGCATGGATTAATTCGTTCAAGACATCTCCCAACAGGAGAGGTTCTTTACACTCCCGTAGACAGGGATATTCATCATTTGACCTGCGTTCAATGCGGAGAGACGTCGAAAATGGAAGGTTGTCCTGTTAAAAATATTCATGCCGGGGATCCTCTAGAGTCGACCTGCAGGCATGCAAGCCTGGCATTTGT	394
786112	HF_READ_04786112	1.67	0.33	0.5	0.67	0	0.17	0.5	0.17	1.83	0.83	0.17	0.33	0.33	0.67	2.5	1.83	1	0.83	3.17	1	1.67	1.33	1.33	1.33	1.83	0.33	3.17	1	1	1.17	32.66	1	NA	0.212712	8.74521	Prochlorococcus marinus str. MIT 9301	92.14	531	fur	Fur family transcriptional regulator; Ferric uptake regulator	Transcription	Environmental	GTATGATCAAAAATACGAGGCAAAAAAAGATTTTGGAAACAATGGTAACTAAGTCTGACATTACCAAAAGACAAGAACAACTTCTTGAAGAACTTAATAAATGCGAGGATGAACTGAGCGGTCAAGAGTTGCATAGACAATTGATTGAAAGCGGAAAAGCTATGGGACTGACAACTGTTTACAGGAATCTTCAAGTTCTTATAAAGCATGGTTTAATTCGTTCTAGACATCTCCCAACAGGAGAGGTTCTTTATACTCCCGTAGATAGAGACATTCATCATTTGACCTGCGTTCAATGCGGAGAGACGTCGAAAATGGAAGGTTGTCCTGTAAAAGATATTCATGCCCCTAAAAAAAATCCAAGAAAGTTTCAACTTTTGTTTCATACACTCGAATATT…	450
979852	HF_READ_04979852	1	0.5	0.67	0	0.67	1	0	1	0.33	1	0	0	0	2.5	0	2.83	1	2.17	0	0	0	0	1.67	0	2.33	0	1	1.33	0	2	23	2	NA	0.180389	9.2364	Prochlorococcus marinus str. MIT 9215	86.51	323	fur	Fur family transcriptional regulator; Ferric uptake regulator	Transcription	Environmental	TGCATGCCTGCAGGTCGACTCTAGAGGATCCCCCGAAAACAATGGTAACTAAGTCTGACATTACCAAAAGACAAGAACAACTTCTTGAAGAACTGAATAATTGTGATGATGAGCTGAGCGGACAAGAGTTGCATAGGCAACTGATGAGTAAAGGCAAATCTATGGGTTTGACAACTGTTTATAGAAATCTGCAAATCTTGATAAAACATGGCTTAATTCGTTCTAGACATCTCCCAAATGGAGAAGTTCTTTATACTCCAGTTGATAGAGATATTCATCATTTGACCTGCGTTCAATGCGGAGAGACGTCGAAAATGGAAGGATGTCCTGTAAAAAATATTCATACTCCTAAAAAAAATCCCAAAAAGTTTCAACTTTTGTTTCATACACTCGAATATT…	450
586402	HF_READ_05586402	0.67	0.5	0.33	0	0	0.17	0.33	0	0.83	1	0.33	0.33	0	0.83	0.83	1.83	1	0.5	2.33	1.67	0.83	0.67	0	0.67	1.33	0.5	2	0.83	0.33	0.17	20.81	1	NA	0.0803833	11.0988	Prochlorococcus marinus str. MIT 9312	97.65	613	fur	Fur family transcriptional regulator; Ferric uptake regulator	Transcription	Environmental	GGCGGTCCCAGCTTGCATGCCTGCAGGTCGACTCTAGAGGATCCCCTAGACAATTGATAGAAGGCGGAAAGGCTATGGGTCTTACGACTGTTTACAGGAATCTTCAAGTTCTGATAAAGCATGGCTTAATACGTTCTAGACATCTACCAACTGGAGAGGTTCTTTACACTCCCGTAGATAGAGATATTCATCATTTGACCTGTGTTCAATGTGGTGAGACATCAAAAATGGAAGGATGCCCGGTAAAAGATATTCATACACCCAAAACAAATCCAAAGAAATTCCAATTGTTGTTTCATACCCTCGAGTATTTCGGGCTTTGCCAAAACTGTTATCAAGCTCAGAATTGAAAAGGAACATTCTCTAATCACAGAAATTATTTTCGTT	387
951922	HF_READ_04951922	0.33	0.33	0	0	0	0.17	0.33	0	1.17	0.67	0.33	0.17	0.5	0.5	0.33	1.5	1.5	1.17	1.33	1.17	0.33	0.5	0.5	0.83	0.17	1.33	0.83	0.67	0.83	1	18.49	9	NA	0.0805594	11.1029	Prochlorococcus marinus str. MIT 9215	97.78	807	fur	Fur family transcriptional regulator; Ferric uptake regulator	Transcription	Environmental	AAAATGATTTCGGAAACAATGTAACTAAGTCTGACATTACCAAAAGACAAGAACAACTTCTTGAAGAACTTAATGAATGTGATGATGAATTGACTGGTCAAGAGTTGCATAGACAATTGATAGAAAGCGGAAAGGCTATGGGACTGACGACTGTTTACAGGAATCTTCAAGTTCTTATAAAGCACGGCTTAATACGTTCAAGACATCTCCCAACAGGAGAGGTTCTGTACACTCCCGTAGATAGAGATATTCATCATTTGACCTGTGTTCAATGTGGTGAGACATCAAAAATGGAAGGATGCCCGGTAAAAGATATTCATACACCCAAAACAAATCCAAAGAAATTCCAATTTTTGTTTCATACCCTCGAGTATTTCGGGCTTTGCCAAAACTGTTATC…	450
619796	HF_READ_05619796	0.83	0.17	0	0	0	0.5	1	0	0.5	0.67	0	1	0.33	0	0.5	0.5	1	0.67	1.17	0.33	0.5	0.67	0	0.5	0.5	0.83	0.5	0.5	0.83	0	14	0	NA	0.249091	8.23911	Prochlorococcus marinus str. AS9601	96	541	fur	Fur family transcriptional regulator; Ferric uptake regulator	Transcription	Environmental	ACCAAGGGCCAGCTTGCATGCCTGCAGGTCGACTCTAGAGGATCCCCGAGTTGCATAGACAATTGATTGAAAGCGGAAAAGTAATGGGGTTGACAACTGTTTACAGGAATCTTCAAGTTCTGATAAAGCATGGTTTAATACGTTCTAGACATCTCCCAACAGGTGAGGTTCTTTACACTCCCGTAGATAGAGACATTCATCATTTGACCTGTGTTCAATGTGGTGAGACATCAAAAATGGAAGGGTGCCCTGTAAAAGATATTCATACACCCAAAACAAATCCAAAGAAATTCCAATTGTTGTTTCATACCCTCGAATATTTTGGACTTTGCCAGAACTGCTATCAAGCACAAAGTTAAAACTAAATATTTT	372
816457	CAM_READ_0085816457	0	0	0	0	0	0.4	0.8	0	0.8	0	0	0.2	0	0	0	2.2	0.2	0	0.6	0	0	0.4	0.4	0.4	0.2	0	1	0.8	0.8	2	11.2	0	NA	0.602177	4.86089	Prochlorococcus marinus str. MIT 9301	97.06	587	fur	Fur family transcriptional regulator; Ferric uptake regulator	Transcription	Environmental	CGATAGATCATTCAAGTTTCTACAAAGTCATCACATCTCCTCTTGGTGTTGGATTACATAAAGATGGGAAGAGATTAACTCCTCAGAGGCTAAAAGTTCTTAATTTATTTGAAAATATTGGCTCTGGAAAGCATCTTAGTGCTGAAGAGGTTCATGAAAAGTTAGTTAAAACAAGCTCCAAAGTTTCACTAGCAACAATTTATAGAACTTTAAGACTTTTAGTACAAATGGGGTTACTTCATGAATTAGAACTTAGTGAGGGTGGACACAGATATGAATTCCTTAGTAATGACACACCAGATCATCATCATTTGATTTGCATTAGGTGTGGAAGAACAGAAGATTCGAAAATGACGAGG	359
8465	JCVI_READ_1092344008465	0	0	0	0	0.33	0.17	0	0	0	0	1	1	0	0	0	1.67	3	0.67	0.67	0	0	0	0	1	0	0	0.5	0	0	0	10.01	0	NA	0.646132	4.48127	Prochlorococcus marinus str. MIT 9301	93.74	589	fur	Fur family transcriptional regulator; Ferric uptake regulator	Transcription	Environmental	TTATGATCAAAAATACGGGACAAAAAAAGATTTCGGAAACAATGGTAACTAAGTCTGACATTACCAAAAGACAAGAACAACTTCTTGAAGAACTTAATAAATGCGAAGATGAATTGAGCGGTCAAGAGTTGCATAGACAATTGATTGAAAGCGGAAAAGCTATGGGTTTGACAACTGTTTATAGAAATCTGCAAATCTTGATAAAGCATGGCTTAATTCGCTCTAGACATCTTCCAAATGGAGAAGTTCTTTATACTCCTGTTGATAGAGATATTCATCATTTGACCTGTGTTCAATGTGGTGAGACATCAAAAATGGAAGGATGCCCGGTAAAAGATATTCATACACCCAAAACAAATCTAAAAAAATTCCAATTGTTGTTTCATACCCTCGAATATT…	450
918611	HF_READ_04918611	0.2	0.4	0	0	0	0	0.2	0	0	0	0	0	0	0.4	1	0.4	0.8	0.2	1.6	0.8	0.4	0	0	2	0	0	0	1.2	0	0.4	10	0	NA	NA	NA	Prochlorococcus marinus str. MIT 9301	87.41	323	fur	Fur family transcriptional regulator; Ferric uptake regulator	Transcription	Environmental	CGGTATGATCAAAAATACGAGACAAAAAAAGATTTTGGAAACAATGGTAACTAAGTCTGACATTACCAAAAGACAAGAACAACTTCTTGAAGAACTTAATAAATGCGAGGATGAATTGAGCGGTCAGGAATTGCATAGGCAGTTGATCACAAAAGGCAAAACTATGGGGTTGACCACTGTTTATAGAAATCTGCAAATCTTGATAAAGCATGGATTAATTCGTTCCAGACATCTCCCAACAGGAGAGGTTCTTTACACTCCCGTAGACAGAGATATTCATCATTTGACCTGCGTTCAATGCGGAGAGACGTCGAAAATGGAAGGTTGTCCTGTTAAAAATATTCATGCCCCTAAAAAAATCCAAGAAGTTTCAGCTTTTGTTTCATACACTCGAATATT…	450
306535	JCVI_READ_1102140306535	0	0.83	0	0	0.83	0	0.83	0	0	1	0	0	1	0	0	1.67	0	0	0.33	0	0	0	0	0	0	0	0	0	0	0.17	6.66	0	NA	NA	NA	Prochlorococcus marinus str. AS9601	99.53	821	fur	Fur family transcriptional regulator; Ferric uptake regulator	Transcription	Environmental	GTATGATCAAAAATACGGGACAAAAAAAGATTTCGGAAACAATGGTAACTAAGCCTGACATTACCAAAAGACAAGAACAACTTCTTGAAGAACTTAATAAATGTGAAGATGAACTGAGCGGTCAAGAGTTGCATAGACAATTGATTGAAAGCGGAAAAGCTATGGGACTGACAACTGTATACAGGAATCTTCAAGTTCTTATAAAGCATGGTTTAATACGTTCTAGACATCTCCCAACAGGAGAGGTTCTTTACACTCCCGTAGATAGAGACATTCATCATTTGACATGTGTTCAATGTGGTGAGACCTCAAAAATGGAAGGGTGCCCTGTAAAAGATATTCATACACCCAAAACAAATCCAAAGAAATTCCAATTGTTGTTTCATACCCTGGAGTATT…	450
6931	A9601_06931	0	0	0	0	0	0	0	0	1.67	2	0	0	0	0	0	0	0.17	0	0	0	1.33	0	0.5	0	0	0	0	0.67	0	0	6.34	0	NA	NA	NA	Prochlorococcus marinus str. AS9601	100	898	fur	Fur family transcriptional regulator; Ferric uptake regulator	Transcription	Genomic	TTGTCATTATCCTCTCAATACAATGTCATTACATCTCCTCTAGGAGACGGCTTACATAAAGATGGGAAGAGGTTAACTCCTCAGAGGTTAAAGGTTCTTAATTTATTTGAAAATATTGGCTCTGGAAAGCATCTTAGTGCTGAAGAGGTTCATGAAAAGTTAGTTAAAACAAGCTCCAAAGTTTCACTAGCAACAATTTATAGAACTTTAAGACTTTTAGTACAAATGGGTTTGCTTCATGAATTAGAACTTAGTGAAGGTGGACACAGATATGAATTGCTTAGTAACGACACACCGGATCATCATCATTTGATTTGCATTAGGTGTGGAAGAACAGAAGAATTCGAAAATGACGAAGTTTTAGAGGCAGGCAAAGTCGCAGCTAAAGTTAATGGTTTT…	453
69486	JCVI_READ_69486	0.67	0.83	0.33	0.33	0.5	1	1.17	0.17	0.83	1.5	2.67	0.5	1	0.83	2	4.17	1.67	4.83	7.33	1.83	2.5	1.17	3.17	2.5	3.17	1	5.33	3.33	0.83	4.17	61.33	1	Yes	0.179609	9.25315	Prochlorococcus marinus str. MIT 9301	96.24	626	fur	Fur family transcriptional regulator; Ferric uptake regulator	Transcription	Environmental	TTTTGTCATTATCCTCTCAATACAAAGTCATCACATCTCCTCTTGGTGATGGATTACATAAAGATGGGAAGAGGTTAACTCCTCAGAGGCTAAAAGTTCTTAATTTATTTGAAAATATTGGCTCTGGAAAACATCTAAGTGCTGAAGAGGTTCATGAAAAGTTAGTTAAAACTAGCTCCAAAGTTTCACTAGCAACAATTTATAGAACTTTAAGACTTTTAGTACAAATGGGGTTGCTTCATGAATTAGAACTCAGTGAGGGTGGACACAGATACGAATTGCTTAGTAACGACACACCGGACCATCATCATTTGATTTGTATTAGGTGTGGAAGAACAGAAGAATTCGAAAATGAAGAAGTTTTAGAAGCAGCTTTCCAGCACACTGGACTGGCCGTCG…	450
40292	HF_READ_05040292	0.4	0	0.4	0	0	0.4	1	0.2	0.4	0.4	1.6	0.2	0	0.6	2.2	2.2	0.2	3.2	1	0.2	0.2	0.4	0.2	2.2	0.6	0.4	0.2	0.2	0.2	0.8	20	1	Yes	0.204314	8.8638	Prochlorococcus marinus str. MIT 9215	86.17	236	fur	Fur family transcriptional regulator; Ferric uptake regulator	Transcription	Environmental	GCAGTGCAGCTTGCATGCCTGCAGGTCGACTCTAGAGGATCCCCCTATGGGTTTGACAACTGTTTATAGAAATCTGCAAATCTTGATAAAACATGGTTTAATTCGTTCTAGACATCTCCCAAATGGAGAAGTTCTTTATACTCCCGTTGATAGAGATATTCATCATTTGACCTGCGTTCAATGCGGAGAGACTTCGAAAATGGAAGGTTGCCCTGTTAAAGACATTCATACGCCTAAAAAAAATCCCAAAAAGTTTCAACTTTTGTTTCATACACTCGAATATTTTGGACTTTGCCAAAACTGTTATCAAGCTCAAAATTAAGAGGGAACATTTTCTAAACACGGAAATTATTTTTTGA	359
960426	HF_READ_04960426	0.2	0.4	0	0.4	0	0.2	0.4	0	0.4	0.8	0.2	0.2	0.6	1.4	0.8	1.6	0	0.4	2.8	0.6	2.2	0.4	1	1.6	0.4	0.8	1.8	0.4	0.4	2.2	22.6	0	NA	0.973097	1.11985	Uncultured Prochlorococcus marinus clone HOT0M-10E12	97.56	904	gidA	Glucose inhibited division protein A	Replication and Repair	Environmental	GGCGGGGGCAGGCTTTGGATGCCTGCGGGGGGGACTCTAGAGGATCCCCCCGAGTTCTCACTAGTAGGAGTGAATATAGATTAACTCTTAGAGGAGATAATGCGGATAGGAGATTAACACCATTAGGTTATCAAATAGGGCTAATTAATGAGAAAAGATGGTCGGCCTATCAAGAAAAAATGAAACTCCTCGAGGAAGAGAAATTTAGATTAAATAACACACGTTTAAAAAATACCAATGAAATATCAAAAAAAATAGAATTAGAAACGGGATCAAAAATCAAAGGCTCAACAACTTTGAAAGAACTCTTAAAAAGACCAAACTTTCATTATTCAGATCTAATTAAATATAATTTAACTGAAAAAAATCTAGGTTCTTCAATACAGGAAGGTGTTGAAA…	719
19191	P9312_19191	0.67	0.33	0.17	0.67	0.33	0.33	0.83	0.33	0.33	0.33	0.5	0.17	0.33	0.83	1.17	0.67	0.17	0.67	1.5	2	0.67	0.17	0.83	1.67	0.33	0.67	1.5	0.5	0.67	1.83	21.17	0	NA	0.728763	3.83179	Prochlorococcus marinus str. MIT 9312	100	3572	gidA	Glucose inhibited division protein A	Replication and Repair	Genomic	ATGCAAGATCATCACTCAACAAATGAATCTTTTGACATTGTCGTCATTGGAGGAGGACATGCGGGATGTGAAGCAGCTATAACATCAGCAAAATTAGGATTTTCTACAGCCTTATTCACAATCAATTTAGATAGGATTGCCTGGCAACCTTGTAACCCTGCAGTTGGCGGGCCAGCAAAAAGTCAGTTAGTGCATGAAGTTGATGCATTAGGAGGAATCATTGGAAAATTAGCTGATAAAACAGCTATACAAAAAAGAATATTAAATGCAAGTAAAGGACCAGCTGTATGGGCATTAAGAGCTCAAACAGATAAAAGAGAATACTCAAAAAAGATGATCGAAATCCTTCAAAATACAGATAATTTATCTTTAAAAGAAGCAATGATTACTGAACTGGAT…	1989
10051	HF_READ_05010051	0.33	0.67	0.33	0.33	0	0	0.33	0	0	0	1	0.67	0	0.67	0.67	0.33	0	0.67	1.33	1.67	1.33	0	1.33	2	0.67	0.33	0.67	0.67	0	2.33	18.33	0	NA	0.342636	7.23552	Prochlorococcus marinus str. MIT 9312	95.79	1178	gidA	Glucose inhibited division protein A	Replication and Repair	Environmental	TTTAATGGAACTACTGGTTATGAAGAAGCAGCAGCACAAGGGTTAGTTGCAGGAGTCAATGCGACAAGAAAACTTAACAAAAAAAACCCAATAATCTTCACTAGAGAAAGCAGCTATATAGGAACAATGATTAATGATTTAATTACCAAAGATCTCAAAGAACCATATAGAGTTCTTACTAGTAGGAGTGAATATAGGTTAACTCTTAGAGGAGATAATGCAGATAGGAGATTAACTCCATTAGGTTATCAAATAGGGCTAATTAATGAGAAAAGATGGTCAGACTATCAAGCAAAGATGAAACTCCTTGAAGAAGAGAAATTAAGATTAAATAACACCCGTTTAAAAAATACCGATGAAACATCAAAAAAAATAGAATTAGACACGGGATCAAAAATT…	837
820919	HF_READ_04820919	0	0	0.17	0	0	0	0	0.17	0	0	0.17	0.17	0	0	0	0	0.67	0.17	0.17	0	0.5	0.17	0.17	1.33	0.17	0.33	0.17	0.5	0.17	0.67	5.87	0	NA	NA	NA	Prochlorococcus marinus str. AS9601	95.26	1493	gidA	Glucose inhibited division protein A	Replication and Repair	Environmental	NTCCAGGATAGTGCACCGAATGGGGGAAAATAACCAGGACGGTTTAAAAACAGGGAATTTCAGCAAAGANGTGGATCAAAGGAAGGTACGATGTTTGAGGAAATTAGATATTTCAACCAAGTACTGCCAGCAGATAAAAATTTTACGTTTGACCCAAGATGTTAAAAATAATAGGCCCACAAGGTAAGTTGTCACATTAACAAGGACAAGTTACCAAAACGCATCAGCTAATTAGAGACAATTTACATTAAACTCCCATTTACGGCGTTTTCATTGATAGTAAGGGGCCCAAGATATTGTCCATCAATTGAAGATAAAATCGTCAAAATTTGCCTGATAAAGAATTCACATCAAATTTTCTTAGAACCAGAAGGAATTAATACCCCTGAAATATATGTA…	1130
957662	HF_READ_04957662	0	0	0	0	0	0	0	0	0.2	0	0.4	0	0	0	0.2	0.2	0	0.6	0.4	0.2	1	0.2	0.8	0	0.2	0.2	0	0.4	0	0	5	0	NA	NA	NA	Prochlorococcus marinus str. MIT 9215	93.89	1132	gidA	Glucose inhibited division protein A	Replication and Repair	Environmental	TAAATGCAAATCATCAAACACAAAATGAATCTTTTGACATCATTGTTATTGGAGGAGGACATGCAGGATGCGAAGCTGCTATAACGACAGCAAAATTAGGTTTTTCTACTGCTTTATTTACAATCAATCTAGATAGGATTGCTTGGCAACCGTGTAATCCTGCAGTTGGGGGACCAGCAAAAAGTCAGTTAGTTCATGAAGTTGATGCATTAGGTGGAATTATTGGTAAATTAGCCGATGAGACAGCTATTCAAAAAAGAATATTAAATGCAAGTAAAGGCCCAGCTGTATGGGCTTTAAGAGCTCAGACAGATAAAAGAGAATACTCAAAAAGAATGATCGAAATACTACAAAATACAGATAATTTATCTTTAAAAGAAGCAATGATTACTGAACTAG…	926
769840	HF_READ_04769840	1.67	1.67	1	1	0.17	0.83	0	0	0.5	0.83	1.5	0.83	0.67	0.17	1	1.17	0.33	0.67	2.5	3.17	2.67	1.5	2.17	1.17	0.5	0	0.83	1.33	1.83	1.5	33.18	11	Yes	0.00121212	16.6659	Prochlorococcus marinus str. MIT 9301	96.88	611	gidA	Glucose inhibited division protein A	Replication and Repair	Environmental	AAATGCAAGATCATCACTCAACAAATGAATCTTTTGACATCATCGTTATTGGAGGAGGACACGCAGGATGCGAAGCAGCTATAACAACAGCAAAATTAGGATTTTCTACAGCCTTATTTACAATCAATTTAGATAGGATTGCCTGGCAACCTTGCAACCCTGCAGTTGGCGGGCCGGCAAAAAGTCAGTTGGTACATGAAGTTGATGCATTAGGTGGAATTATTGGTAAATTAGCCGATGAGACAGCTATACAAAAAAGAATATTAAATGCAAGTAGAGGCCCAGCTGTATGGGCATTAAGAGCTCAAACAGATAAAAGAGAATACTCAAAAAAGATGATTGAAATACTACAGGGGATCCTCTAGAGTCGACCTGCAGGCATGCAAGCTGCACTGCT	397
906916	HF_READ_04906916	0	0.6	0.4	0.2	0	0.4	0	0	0.4	0.4	1.8	0.6	0.2	0.4	0.4	0.4	0	0.2	1.6	1.4	0.8	0.8	2.4	0.6	0.2	0.4	1	1.2	0	0.8	17.6	6	Yes	0.172639	9.34921	Uncultured Prochlorococcus marinus clone HOT0M-10E12	96.13	878	gidA	Glucose inhibited division protein A	Replication and Repair	Environmental	AAAATGCAAGATCATCACTCTACAAATGAATCTTTTGATGTCATCGTTATTGGAGGAGGACATGCTGGATGTGAAGCAGCTATAACAACAGCAAAATTAGGATTTTCTACAGCCTTATTTACAATCAATTTAGATAGGATTGCCTGGCAACCTTGCAACCCTGCTGTTGGCGGCCCAGCAAAAAGTCAGTTGGTACATGAAGTTGATGCGTTAGGTGGAATTATTGGTAAATTAGCTGATGAGACAGCAATACAAAAGAGAATATTAAATGCAAGTAGAGGTCCAGCCGTATGGGCATTAAGAGCTCAGACAGATAAAAGAGAATACTCAAAAAAGATGATTGAAATACTACAAAATACAGATAATTTATCTTTAAAAGAAGCAATGATTACTGAACTA…	653
37486	HF_READ_05037486	0.5	0.83	0.33	0.67	0.17	0.67	0	0	0	0.17	0.33	0.33	0.33	0.17	1	0.5	0.33	0.67	1.5	1	0.83	0.67	0.5	0.83	0	0.17	0.5	0.17	1.5	0.5	15.17	11	Yes	0.139486	9.87109	Prochlorococcus marinus str. MIT 9215	93.39	714	gidA	Glucose inhibited division protein A	Replication and Repair	Environmental	AAATGCAAGATCATCAAGCAACAAATGAATCTTTTGACATTATCGTTATTGGAGGAGGACATGCAGGATGCGAAGCAGCTATAACAACAGCAAAATTAGGTTTTTCTACAGCCTTATTCACAATCAATTTAGATAGGATTGCCTGGCAACCTTGTAATCCTGCAGTTGGAGGGCCAGCAAAAAGTCAGTTAGTGCATGAAGTTGATGCATTAGGAGGAATTATTGGTAAATTAGCTGATGAGACAGCGATCCAAAAAAGAATATTAAATGCGAGTAGAGGGCCAGCTGTATGGGCATTAAGAGCACAAACAGATAAAAGGGAATACTCCAAAAGAATGATTGAAATACTTCAAAATACAGATAATTTATCTTTGAAAGAAGCAATGATTACTGAACTGG…	607
95842	HF_READ_05095842	0.6	0.6	0.4	0	0	0	0	0	0	0	0.6	0.4	0.2	0	0.2	0.4	0	0.6	0.6	0.6	1	0	0.2	0.6	0.4	0.4	0.6	0.8	0	1.4	10.6	3	Yes	0.102092	10.5135	Prochlorococcus marinus str. MIT 9312	96.43	1237	gidA	Glucose inhibited division protein A	Replication and Repair	Environmental	TCAAAAATAATATGCCCCAAGTTAGTTGTCATATCACAAGAACAACTGCTAAAACACATCAACTCATTCGAGACAATTTACATTTAACTCCCATTTACGGCGGTTTTATTGATAGTAAAGGGCCAAGATATTGTCCATCAATTGAAGATAAAATAGTTAAGTTTGCTGATAAAGAATCACATCAAATTTTCTTAGAACCTGAAGGAATTAATACCCCTGAAATATATATACAAGGATTTTCTACAGGTTTACCCGAAAATATTCAATTAGAACTTTTAAGAACCTTACCTGGATTAAGTGAATGTAAAATGTTGCGACCAGCATATGCTGTCGAGTATGACTATATACCTGCAACACAACTCCAAACATCACTCGAAACAAAAGAAATTGAATATTTAT…	787
345974	JCVI_ORF_1105138345974	0.83	5.5	2.5	3.67	1.17	2.17	1.67	0.83	0.5	1.83	4.17	0.83	2.17	6	4.83	5	2.17	3.33	7.5	5.33	5.83	5.17	7.17	3.83	1.17	2.5	7.33	3.83	2.5	10	111.33	0	NA	0.281485	7.85885	Prochlorococcus marinus str. AS9601	92.53	513	glnA	glutamine synthetase, type I	Amino Acid Metabolism	Environmental	GGGGGGGGGCCTGAAAAACTTTATGTTAAAATGTCCATGAGCTTTAGCTCAAAAGGTATTAAAGTATTTAGATTCGACTGGTTTCTTTTTTACTGCATTTTTTGGACTAAACAAGAATTCTTCTTATTTGATGACGTAAGATACGACTCTAAAGAAGGAGGTTGGTTTTATAGTGTAAATACTATTGAAGCTCCATGGAATACTGGGAGAATTGAAGAAGGGGGAAACCTAGGATACAAGATACAATATAAAGAAGGATATTTTCCAGTAGCTCCAAATGATACTGCGCAAGATATCAGATCTGAGATGCTTCTTCTTATGGGTGAATTAGGTATTCCCACTGAAAAACATCACCATGAAGTTGCTGGTGCAGGCCAACCCGATCTTGGAATGAAATTT…	405
582452	JCVI_ORF_1105108582452	0.83	1.67	1.17	1.83	0.17	2.17	1.33	0.5	0.5	2.33	1.5	1.33	0.67	4.17	3.17	3.5	1.67	3.83	3.33	2	4	2.5	3.17	3.67	1.67	1.17	2.33	1.33	1.33	6.5	65.34	0	NA	0.877085	2.48307	Prochlorococcus marinus str. MIT 9215	94.71	1388	glnA	glutamine synthetase, type I	Amino Acid Metabolism	Environmental	CCAAGCTCGGTTAGGTACTGTACCAGATTCTTCTTATTTGATGACGTAAGATACGACTCGAAAGAAGGATCTTGCTTTTACAGTGTAGATACAATTGAAGCTCCATGGAACACAGGAAGAATTGAAGAAGGGGGAAATCTAGGATACAAGATCCAATACAAAGAAGGTTATTTCCCAGTTTCTCCAAATGATACTGCGCAAGACATCAGATCTGAAATGCTGCTTTTAATGGGTGAATTAGGCATACCCACAGAAAAGCATCACCATGAAGTTGCTGGTGCTGGTCAACACGAACTTGGAATGAAATTCGATTCTTTAATAAATTCCGCTGATAATGTTATGACTTATAAATACGTTGTCAGGAATGTTGCTAAAAAATATGGGAAAACTGCAACGTTT…	927
373820	JCVI_ORF_1105097373820	0.4	0.8	0.4	0.8	0	0.6	0.8	0.8	0	1.6	1.2	0	0.2	2.8	1.6	2.2	2	1.8	1.8	2.4	0.4	1.6	1.4	1.2	1.4	0.2	1.6	1.6	0.2	1.6	33.4	0	NA	0.380697	6.88736	Prochlorococcus marinus str. MIT 9215	95.1	1554	glnA	glutamine synthetase, type I	Amino Acid Metabolism	Environmental	CTACCGTTTGCAGTGAGAACGACTCAAAGAGGTTCTTGCTTTTACAGTGTAGATACAATTGAAGCTCCGTGGAACACAGGAAGAATTGAAGAAGGTGGGAATTTAGGATACAAGATCCAATATAAAGAAGGTTATTTCCCAGTTTCTCCAAACGATACTGCGCAAGACATCAGATCTGAAATGCTACTTTTAATGGGTGAATTAGGCATACCCACCGAAAAGCATCACCATGAAGTTGCTGGTGCCGGTCAACACGAACTTGGTATGAAATTCGATTCATTAATAAATTCTGCTGATAACGTAATGACTTATAAATACGTTGTCAGGAATGTTGCTAAAAAATATGGGAAAACTGCAACGTTTATGCCCAAGCCTGTATTTAACGATAATGGAACTGGA…	1008
329366	JCVI_ORF_1105078329366	0.6	0.6	1	0.4	0	1	0.8	0.2	1.4	0.6	0.2	0.4	0.2	2	1.6	1.4	1.4	1.2	1.4	2	0.8	0.8	2.2	0.6	0.8	1.4	0.4	1.2	0.4	2.8	29.8	0	NA	0.619278	4.72375	Prochlorococcus marinus str. MIT 9215	94.44	1659	glnA	glutamine synthetase, type I	Amino Acid Metabolism	Environmental	CCAAGGGCTGGAGGTCAATTAAAGATGAGGATTGAACTCATCGATTTAAAATTCACAGACATCCATGGTAAATGGCAGCATTTAACTCTTACATCAGACATGATAGAAGAGGATTCATTTACAGAAGGTCTAGCATTTGATGGTTCATCAATAAGGGGTTGGAAAGCAATTAATGCCTCCGACATGTCAATGGTCCCCGATGCAAGTACAGCATGGATAGATCCTTTTTACAAACATAAAACTCTAAGTATGATTTGCTCTATCCAAGAGCCTAGAAGTGGAGAACCTTATGATAGGTGCCCAAGATCATTAGCTCAAAAGGCTTTAAAGTACTTAGAATCGACTGGTATTGCTGATACAGCATTTTTTGGACCGGAACCAGAATTCTTCTTATTTGAT…	1095
357810	JCVI_ORF_1105103357810	0	0.67	0.67	0.33	0	0	1	0	0	1	0.67	0	0	2.33	1.33	0.67	0.67	1.33	1.33	0	0.33	1.67	0.33	1	1.33	0.67	0.67	0	0.33	3	21.33	0	NA	0.76273	3.53856	Prochlorococcus marinus str. MIT 9215	94.65	1703	glnA	glutamine synthetase, type I	Amino Acid Metabolism	Environmental	GGTCTAGCATTTGATGGCTCATCAATAAGAGGTTGGAAGGCATTATGCCTCCGATATGTCAATGGTCCCCGATTCAAGTACAGCTTGGATAGATCTTTTACAAAACATAAAACACTAAGTATGATTTGCTCTATCCAAGAGCCTAGAAGTGGAGAGCCTTATGATAGATGCCCAAGATCTTTAGCTCAAAAGGCTTTGAAGTACTTAGAATCTACTGGGATTGCTGATACAGCATTTTTTGGACCGGAACCAGAATTCTTCTTATTTGATGACGTGAGATACGACTCAAAAGAAGGTTCTTGCTTTTACAGTGTTGATACAATTGAAGCTCCATGGAACACAGGAAGAATTGAAGAAGGTGGAAATTTAGGATACAAGATCCAATACAAAGAAGGTTAT…	1116
523278	JCVI_ORF_1105139523278	0	0.67	0.67	0	0.33	0.67	0	0.33	1.33	0.33	1	0	0.33	0.33	1.33	1.33	0.33	1.33	0.33	0.33	1	0.33	1.33	0.67	0.67	1	1	1	0.67	2.67	21.31	0	NA	0.358406	7.08377	Prochlorococcus marinus str. MIT 9215	94.03	1592	glnA	glutamine synthetase, type I	Amino Acid Metabolism	Environmental	CGTTGCAGTGTCACATTTACTCTTACATCAGACATGATTGAAGAGGATTCATTTACGGAAGGTCTTGCATTTGATGGTTCATCAATAAGAGGTTGGAAAGCAATTAATGCCTCCGATATGTCAATGGTTCCTGATGCAAGTACAGCATGGATAGATCCTTTTTATAAACATAAAACTTTAAGTATGATTTGCTCTATCCAAGAGCCTAGAAGTGGGGAGCCTTATGATAGATGCCCAAGATCTTTAGCTCAAAAGGCCTTAAAGTACTTAGAATCGACTGGGATTGCTGATACAGCATTTTTTGGACCTGAACCAGAATTCTTCTTATTTGATGACGTAAGATATGACTCAAAAGAAGGTTCCTGCTTTTATAGCGTAGATACAATTGAAGCTCCATGG…	1074
596035	CAM_READ_0234596035	0	0.33	0.67	0	0.67	0	0.33	0	0	0	0.33	0	0.33	0.67	0.67	0.33	0	0	1	0.67	0.33	0	1.33	1	1.33	0	0.67	0.33	0	1	11.99	0	NA	0.248927	8.24966	Prochlorococcus marinus str. AS9601	97.67	474	glnA	glutamine synthetase, type I	Amino Acid Metabolism	Environmental	CCCGGTTTATGTAGATAGTAACGTTATGACAGGCAGAACTGGTGATTCTCTTGAAAATGGTACTTATAAAGGATTGACATATCTTGCTATAAACGAAGCCAATAACTTTCTGCCAAAACTGCCTGAAAAAAAAGTTGATATTTTATATCTTTGTTTTCCTAATAATCCAACTGGAGCAACGATTAATAAAGCAGAATTGAAGAAGGGGGAAACTTAGGATACAAAATACAATATAAAGAAGGATATTTTCCAGTAGCTCCAAATGATACTGCGCAAGATATCAGATCTGAGATGCTTCTTCTTATGGGTGAATTAGGCATCCCCACAGAAAAACATCACCATGAAGTTGCTGGTGCCGGCCAACACGAGCTTGGAATGAAATTGATTCGTTAATAATGC…	502
453698	JCVI_ORF_1105119453698	0	0.6	0.2	0	0	0.2	0	0	0.4	0.6	0.6	0	0	0.6	1.2	0.2	0	0.4	0.6	0.2	0.4	0	0.2	0.4	0.2	0.4	0.6	0.4	0.2	1.2	9.8	0	NA	0.412539	6.53528	Prochlorococcus marinus str. MIT 9215	93.19	783	glnA	glutamine synthetase, type I	Amino Acid Metabolism	Environmental	TTATGTCTAAATCTCCACAAGATGTTTTAAGTCAAATTAAAGATGAAGGAATTGAACTCATCGACTTAAAATTTACTGACATCCATGGTAAGTGGCAACATTTAACTCTTACATCAGACATGATAGAAGAGGATTCTTTTAAAGAAGGACTAGCATTTGATGGTTCATCAATAAGAGGTTGGAAGGCAATTAATGCGTCCGATATGTCAATGGTTCCTGATGCAAGCACAGCATGGATAGATCCTTTTTATAAACATAAAACTTTAAGCATGATTTGCTCTATCCAAGAGCCAAGAAGTGGTGAGCCTTATGATAGATGCCCAAGATCATTAGCTCAAAAGGCCCTTAAGTACTTAGAATCTACTGGGATTGCTGATACAGCATTTTTTGGACCGGAAC…	566
9401	A9601_09401	1.17	0.83	1.5	1.33	0.33	2.83	0.33	0	0.17	0.5	3.67	0.83	3.33	8.5	8.17	5	1.83	2.17	3.33	2.67	2.17	3	2.67	6.33	1.17	1.17	3.33	1.67	2	7.17	79.17	7	Yes	0.200622	8.92635	Prochlorococcus marinus str. AS9601	100	2777	glnA	glutamine synthetase, type I	Amino Acid Metabolism	Genomic	ATGTCTAAATCTCCTCAAGATGTTTTAAGTCAAATTAAAGATGAAGGAATTGAACTCATCGATTTAAAATTCACTGATATTCATGGAAAATGGCAACATTTAACTCTTACATCAGACATGATAGAGGAGGATTCTTTTACAGAAGGGTTAGCATTTGATGGCTCATCAATAAGAGGTTGGAAAGCAATTAATGCCTCGGATATGTCAATGGTGCCCGATGCAAGTACAGCTTGGATAGATCCTTTTTATAAACATAAAACTTTAAGTATGATTTGCTCTATTCAAGAGCCAAGAAGCGGGGAACCTTATGATAGGTGTCCAAGAGCTTTAGCTCAAAAGGCATTAAAATATTTAGACTCGACTGGTATAGCAGATACTGCATTTTTTGGGCCAGAACCA…	1422
16651	A9601_16651	10	15.17	11.17	7.5	2.83	10.67	23.83	4	14.67	7.67	16.17	8.17	3.67	13.33	35.17	39.33	36.5	12.67	30	28.83	28	18.33	27	21.17	37.33	24.33	42.17	33.67	22.5	30.33	616.18	9	NA	0.059572	11.6996	Prochlorococcus marinus str. AS9601	100	672	glnB	nitrogen regulatory protein P-II	Signal Transduction	Genomic	ATGAAGAAAATTGAAGCAATCATACGTCCATTTAAGCTGGAGGATGTAAAAATTGCATTAGTAAATTCCGGTATTGTTGGAATGACAGTTAGTGAAGTTAGAGGTTTTGGAAGGCAAAAAGGACAAGTTGAAAGATATAGAGGTTCTGAATTTACTGTTGAATTTCTTCAAAAACTTAAAGTAGAAGTTGTCGTAGAAGATGAAAAGGTTAATTCAGTCATAGATGCGATTGCTGAAGCAGCAAAAACTGGAGAGATAGGTGACGGAAAAATATTCATCACATCAATTGATTCAGTTGTAAGAATTAGAACTGGCGATAAAGACGAAGAAGCTCTTTAA	339
942244	HF_READ_04942244	0	0.83	0.17	0	0	0.67	0	0	0	1.5	2.17	0	0.17	1.33	0	0.17	0	1	4	0.17	0	0	0.33	0.67	0.17	0.67	3	2.17	0	0.33	19.52	3	NA	0.209367	8.79319	Prochlorococcus marinus str. MIT 9301	96.53	1211	icd	isocitrate dehydrogenase	Carbohydrate Metabolism	Environmental	AAAAGTCGTGCCAGCTTGCATGCCTGCAGGTCGACTCTAGAGGATCCCCCTCCCAGCCCTCACAAAAATCCCCAAAATTTAGACGTTATTGTTTATAGGGAAAATACTGAGGATATCTACATGGGAATTGAATGGGAAGCGGAGGATAATAATTGTCTTGAATTAATTAATCACTTAAATAACATTGTCATACCAAAAAGTAAAAATCTAAAAAATAGATCTATACCAAACGGATCAGGTATTGGAATAAAGCCAGTGAGTAAATCTGGTAGCCAAAGGCATATTAGAAAAGCTATTGAACATGCTAAAAAATTATCAGGAGATAAGAGGCATGTGACTCTTGTACATAAAGGGAATATTATGAAATACACAGAAGGTGCATTTAGAGATTGGGGATAT…	835
994872	HF_READ_04994872	1	0	0	0.25	0	0.75	0	0.25	1.5	0.75	0.75	0.25	0.5	0.75	1	0.5	0.5	1.25	2	0.5	0.75	0	1	0.25	0	0.25	1.5	0.25	0	1	17.5	1	NA	0.201072	8.92722	Prochlorococcus marinus str. MIT 9215	94.15	1110	icd	isocitrate dehydrogenase	Carbohydrate Metabolism	Environmental	CAAAGCTATGCCAAATTGAAAATTACTTACCTAATGAAGCGAGATATACTTTTAGTCAAGCAACCTAATGTCCTAATAATCCCATTGTCCCTTTATCAGAGGTGATGGTACTGGAGTTGATATTTGGCCAGCTACTCAAATCGTTCTTGATTCAGCGATTAAAAAAAGTTATGGAGATGAAAGAAAAATTAATTGGTTTAAAGTCTATGCAGGCGATGAAGCATGTGAACTTTATGGGACATATAACTATCTCCCTCAAGATACTATTGAAGCAATCAGACACTTCGGTGTAGCCATCAAAGGTCCTTTAACAACTCCCATCGGTGGAGGTATTAGATCTCTTAATGTTGCATTAAGACAAATTTTTGATTTATATAGCTGTGTAAGACCATGCAAATA…	872
583075	HF_READ_05583075	0	0.67	0.5	0	0	0.17	0.17	0.33	0.17	1	0.17	0	0	0.17	0.33	0.67	0.33	1	1.5	0.67	0	0.17	0.33	0.5	0	0.5	1	1.33	0.5	0.83	13.01	3	NA	0.0281776	12.8286	Prochlorococcus marinus str. MIT 9301	94.83	765	icd	isocitrate dehydrogenase	Carbohydrate Metabolism	Environmental	GGAAAAGTTTTTCCTTTGGCAGCTTGTTTTTCGGGTCGGGTCTAGAGGATCCCGGTTTTGACAAGCTTACAAATAACAAAAAAGCATTCATTTGCGAAGAAATCAAAGAAGTTATTGCATCAATATCGAATTCTCACGGAGATGGTAAATGGAGAGAACTAATTCTTGTTGATGATCGGATAGCTGATAGTATATTTCAACAAATTCAAACTAGACCTCAAGAATATTCAATTCTTGCAACATTAAACCTTAATGGAGACTATGTTTCTGATGCAGCTGCAGCTATTGTTGGAGGCCTAGGTATGGCTCCCGGTGCAAATATTGGAGATAATGCAGCAATTTTTGAAGCTACGCACGGTACCGCTCCAAAACATGCAGGCTTAAACAAGATTAATCCCG…	576
701569	CAM_READ_0084701569	0	0	0	0.33	0	0.33	0	0	0.67	0.33	0.33	0	0	0.33	0.67	0.67	0	0.67	0.67	0.33	0	0.33	0.33	0	0.33	1	0.67	0.67	1	0.67	10.33	9	NA	0.197273	8.99153	Uncultured Prochlorococcus marinus clone HF10-88H1	95.81	519	icd	isocitrate dehydrogenase	Carbohydrate Metabolism	Environmental	GTAAAAATTTAAACTTTTAACCTTAAACGTAAAGGTCGTAGTATTAATTAACTTTTTAATTCAAGGCAAACCTAATGTTCCTAATAATCCAATTGTCCCATTTATTAGGGTGATGGTACTGGGGTTGATATTTGGCCTGCAACTCAATCGTTCTTGATTCAGCTATTAAAAAAAGCTATAGAGATGAAAGAAAAATTAATTGGTTTAAAGTCTATGCAGGCGATGAAGCTTGTGAACTTTATGGAACATATAATTACCTCCTCAAGATACTATTGAAGCAATCAAAACACTTTGGTGTAGCCATCAAAGGTCCTTTAACTACTCCTATCGGTGGAGGCATTAGATCTCTTAATGTTGCATTAAGGCAAATNTTTGATTTATACAGCTGTGTTAGACCTT…	415
918829	HF_READ_04918829	1	1	0	0	0	0	0	1	0	0	0	0	0	0	0	0	0	0	1.75	1	1	0	0	0	1	0.75	0	0	0	1	9.5	0	NA	0.382556	6.86749	Prochlorococcus marinus str. MIT 9215	94.16	821	icd	isocitrate dehydrogenase	Carbohydrate Metabolism	Environmental	CTATGCCAAAATTTGAAAAATTAAATTTACCTAATGAGGGAGAGATAATAACTTTTAATCAAGGCAAGCCGAATGTTCCGAATAATCCAATTGTCCCATTTATTAGGGGTGATGGAACTGGAGTTGATATATGGCCAGCAACTCAAATGGTTCTTGATGAAGCCATTAAAAAAAGTTATAGAGATGAAAAAAAAATTAATTGGTTTAAGGTATATGCAGGAGATGAAGCTTGTGAACTTTATGGAACATATAACTATCTCCCTCAAGATACTATTGAAGCAATCAGACACTTCGGTGTAGCCATTAAAGGTCCTTTAACGACTCCCATAGGTGGAGGTATTAGATCTCTTAATGTTGCATTAAGGCAAATCTTTGATTTATATAGCTGTGTTAGACCAT…	622
5443	HF_READ_05005443	0	0	0	0	0	0	0	0	0	0.33	0	0	0	0	0	0	0.33	1	0	0	0	0	0	0.33	0	0.67	2.33	0	0.33	0	5.32	0	NA	NA	NA	Prochlorococcus marinus str. MIT 9301	95.8	1195	icd	isocitrate dehydrogenase	Carbohydrate Metabolism	Environmental	TGATGGTCCTGAAGTTGATAATTTGCTGCTCATCAATCGTCTGATCAGCGATTAAAAAGCTAGAGATGAGAAAATATGTTAAAGTCTATGCAGGCGATGAAGCTTGTGAACTTTATGAACATATAACTATCTCCCTCAAGATACTATTGAAGCAATCAGACACTTTGTGTAGCCATCAAAGGTCCTTTGACGACTCCCATCGGCGGAGGTATTAGATCTCTTAATGTTGCATTAAGGCAAATCTTTGATTTATATAGCTGTGTTAGACCATGCAAATATTATTCAGGAACTCCAAGCCCTCATAAAAATCCCCAAAATTTAGACGTTATCGTTTATAGAGAAAATACTGAGGATATCTATATGGGAATTGAATGGGAAGCGGAGGATAATAATTGTCTT…	934
4125	HF_READ_05004125	2	1	0.4	0.8	0.2	0.8	1.6	0.8	1.2	2.8	2.2	0.6	0.6	2.2	5.2	3.8	6.2	7.2	7.8	1.2	2.2	0.8	1.8	0.8	5	3.2	5.2	4.8	1.6	6.2	80.2	1	Yes	0.00605769	15.0207	Prochlorococcus marinus str. MIT 9215	96.36	952	icd	isocitrate dehydrogenase	Carbohydrate Metabolism	Environmental	CTATGCCAAAATTTGAAAAATTAAGTTTACCTAATGAAGGCGAGATAATAACTTTTAATCAAGGCAACCCTAGTGTTCCTAATAATCCAATTGTTCCATTTATTAGGGGGGATGGTACTGGAGTTGATATTTGGCCTGCGACTCAAATCGTTCTTGATTCAGCAATTAAAAAAAGCTATGGAGATGAAAGAAAAATTAATTGGTTTAAAGTCTATGCAGGCGATGAAGCTTGTGAACTTTATGGAACATATAACTATCTCCCTCAAGATACTATTGAAGCAATCAAACACTTTGGTGTAGCTATCAAAGGTCCTTTAACTACTCCCATCGGTGGAGGTATTAGATCTCTTAATGTTGCATTAAGGCAAATTTTTGATTTATATAGCTGTGTTAGACCAT…	706
843289	HF_READ_04843289	0.25	1.25	0.5	0	0.25	0.75	0.75	0	0.25	0.25	0.25	0.75	0	0.5	0.75	1	0.25	2.25	1.5	0.25	1	0.5	0.75	0	0.5	1.25	2.5	2	0.75	0.5	21.5	9	Yes	0.222888	8.61222	Prochlorococcus marinus str. MIT 9301	94.94	1172	icd	isocitrate dehydrogenase	Carbohydrate Metabolism	Environmental	CAAGGGCTCGCCAGACGAAGGTCAGGCTGCNTGCTGCAGGTCGACTCTAGAGGATCCCCCAAGTCGAGAAGCCAAAGGCATATTAGAAAGGCTATTGAACATGCTAAAAGATTATCAGGAGATAAAAGGCATGTGACTCTTGTACATAAAGGGAATATTATGAAATATACCGAAGGTGCGGGTAGAGATTGGGGGTATGAATTAGCAGTCAATGAATTTCGAGAAGATTGTATTACAGAAAGAGAAAGCTGGATTTTAGATAATATTCAGAAAAATCCAGAAATTACAATTGAAAATAATGCTCGAAAAATCGAACCAGGTTTTGACAAACTTACAAATAATAAAAAAGCATTTATTTGCGAAGAAATTAAAGAAGTCATTGCTTCAATATCAAATTCT…	841
18051	A9601_18051	0.17	0.5	0.33	0	0.5	0.17	0.17	0	0.33	0.33	0.33	0.33	0.17	0	0.83	0.67	0.83	1.33	1.33	1.17	0.33	0.33	0	0.67	0.33	1.17	1.83	1.17	0.67	0.67	16.66	9	Yes	0.0877558	10.8814	Prochlorococcus marinus str. AS9601	100	2611	icd	isocitrate dehydrogenase	Carbohydrate Metabolism	Genomic	ATGCCAAAATTTGAAAAATTAACTTTACCTTATGAAGGCGAGATAATAACTTTTAATCAAGGCAAACCTAATGTTCCTAATAATCCAATTGTCCCATTTATTAGAGGTGATGGTACTGGAGTTGATATTTGGCCTGCAACTCAAATCGTTCTTGATTCAGCTATTAAAAAAAGCTATGGAAATGAAAGAAAAATTAATTGGTTTAAAGTCTATGCAGGTGATGAAGCTTGTGAACTGTATGGAACATATAACTACCTCCCTCAAGATACTATTGAAGCAATCAAACACTTTGGTGTTGCAATCAAAGGTCCTTTAACGACTCCCATCGGTGGAGGTATTAGATCTCTTAATGTTGCATTAAGGCAAATATTTGATTTATATAGCTGCGTTAGACCATGC…	1425
6509	HF_READ_05006509	0.5	0.83	0.5	0	0.17	0.33	0.33	0	0.33	0.5	0.17	0.17	0.17	0.5	0.67	0.17	0.67	1.5	1	1.33	0.67	0.17	0.33	0.17	0	1.17	1.5	1.5	0.17	0.83	16.35	9	Yes	0.138098	9.90756	Prochlorococcus marinus str. MIT 9301	96.69	783	icd	isocitrate dehydrogenase	Carbohydrate Metabolism	Environmental	AAAGTGCCAAGCTTGCATGCCTGCAGGTCGACTCTAGAGGATCCCCGCGAAGAAATTAAAGAAGTTATTTCATCAATATCAAATTCACACGGAGATGGTAAATGGAGAGAACTTATTCTTGTTGATGATCGGATAGCTGATAGTATATTTCAACAAATTCAAACTAGACCTCAAGAATATTCAATTCTTGCAACCTTAAACCTCAATGGTGACTATGTTTCTGATGCAGCTGCAGCTATTGTTGGTGGCCTTGGGATGGCTCCTGGTGCAAATATTGGAGATAATGCAGCAATTTTCGAAGCTACGCACGGTACTGCACCAAAACATGCAGGCTTAAATAAGATTAATCCAGGCTCAGTAATTCTTAGTGGTGTAATGATGCTTGAATATTTTGGTTGG…	529
408052	JCVI_READ_1092345408052	0	0.25	0.5	0	0	0.25	0.25	0.25	0	0	0	0	0	0.25	1	0	0.5	0.75	1.75	1	0	0.75	0	0.25	0	0	0.5	0	0.5	0.25	9	0	NA	NA	NA	Uncultured Prochlorococcus marinus clone HOT0M-2B5	93.29	638	idiA	iron ABC transporter, substrate binding protein	Membrane Transport	Environmental	TCAATCAGAAACAAAGGCGTGGCTAAGCGGAATGATTCAACGTTCCCAACCATTTTCCCAGTGATATTTCATATAGGGCAGTTTCCAAAAAAAATGTGGAGTAGGAATAGTAATCATTATTATGTCGCAAGAATGTTAGCTGGTGTTAATGGAAGAAGAGATGCTTTATATGCTAAAAAAACAAAGGTCCTTACTCCTAATCCTGCACATGTAAATATTAGTGCTGGTGGTGTTGCAAAATATGCAAAGAATAAAAATGAAGCTATTCAGTTGCTTGAATTCTTAGCATCTCCTGAAGGAAGTGAAGGTTTAGCTGCGCCAACTTTTGAACATCCTTTGAAGGAAGTTAATCAAAATGAAATAGTGAAGAGCTTTGGAGAGTTTACGCCTGATAGTGTT…	635
949254	HF_READ_04949254	0	0	0	0	0	0	0.5	0	0.25	0	0	0	0	0	1	0.25	1	0	0.5	0	0	0	0.5	0.5	0.5	0	0	0.25	0	0.25	5.5	0	NA	NA	NA	Uncultured Prochlorococcus marinus clone ASNC612	92.12	551	idiA	iron ABC transporter, substrate binding protein	Membrane Transport	Environmental	AAGTGCAAAAATTTAAAAAAGTCCTCTTTTCAGTTTTAACGTTTGGTTTTTTAATTAATTCATATATACCTGCTTATTCTACAGAAAAAGAAGTCAAAGTTTATTCTGGTAGACATTACAATACAGATAGAAGTGTATACAAGAAATTCTCCGAAGAAACTGGAATTAAAGTTAGGCTTATAGAAGCTGCGGGAATTTCTTTAATTGAAAGATTGAAACGAGAAGGAAAGAATTCCCAAGCAGATTTAATATTGTTAGTAGATGCAGCAAGAATTACTAATGCAGCTAAAGCTGGATTACTGCAACCAATAGAATCTTCTAATTTAGAAAATGATGTTCCTGTTGGATTAAAAGATCCAAAAAAGGAATGGTATGCATTAACCAGAAGGGTTAGAGTTA…	527
520137	JCVI_READ_1105333520137	0	1.33	1	0	1	0.67	0.33	0	0	0.33	1.67	0.67	0.67	0.33	1.33	0.33	1.67	1	0.67	1.33	1.67	2.67	0.67	2	0	0.33	1.33	0.67	0	1	24.67	0	NA	0.27022	7.9753	Uncultured Prochlorococcus marinus clone ASNC612	93.84	692	isiB	Flavodoxin	Energy Metabolism	Environmental	TTTATTTTTTTTTGGAAGTTGAGTCTCCACTTTATTCCTTCGCAGAAGCACCTAAAGATGTATCTGATGTGGATGATCTTTCAGAATTGAAAATCTGGATGGAATTATCTGCGGGATCCCTACTTGGAATACTGGTGCCGATGAAGAAAGATCTGGAACTGCATGGGATTCAATCTTAGAAGATATTGGTGAACTAATTTTATCAGGAAAAAAAGTTGCAATTTTTGGTTTAGGAGATTCTTCAACGTATACAGAAAACTATTGTGATGCAATGGAAGAACTTCATAGCTACTTTACAAAAGCTGGCGCCGAAATGATCGGTTACGTAGATAAATCTTCTTATACATTTGATGAGTCTAAAAGTGTTATAGGAGAAAGCTTTTGTGGATTACCTCTTGA…	576
215131	JCVI_READ_1092963215131	0	0.5	0.25	0	0	0.25	0	0.25	0.25	0.5	1	0	0.25	0.25	0.5	1.25	0.25	0.25	0.5	0.25	0.75	1	1	1	0.25	0	0.75	0.5	0	0.5	12.25	0	NA	0.985764	0.759914	Uncultured Prochlorococcus marinus clone ASNC1363	96.29	914	isiB	Flavodoxin	Energy Metabolism	Environmental	TTATGACTGTAGGAATTTATTACGCAACTACAACTGGAAAAACTGAAGACGTAGCTGATCGTCTTCACAACTTTATCTCTTCAGCAGAAGCGCCTAAAGATGTATCTGATGTAGATGATCTTTCGGAATTTGAAGGTCTTGATGGAATTATCTGCGGGATACCTACTTGGAATACTGGTGCCGATGAAGAAAGATCCGGAACTGCATGGGATTCAATCTTAGAGGATATTGGTGAACTAAGTTTATCAGGAAAAAAAGTTGCAATTTTTGGTTTAGGAGATTCTTCTACATATACAGAAAATTATTGTGATGCAATGGAAGAACTTCATAGCTACTTCACAAAAGCAGGTGCCGAAATGGTCGGTTACGTAGATAAATCTTCCTATACATTTGATGAGT…	591
604456	HF_READ_05604456	1	0.5	0	0.5	0.25	0.25	0	0	0	0	0.25	0.5	0.75	0	0.25	0.5	0.25	0.25	1.25	0	0	0.5	0.75	0.75	0.75	0	0.25	1.5	0	0.5	11.5	0	NA	0.579623	5.07175	Uncultured Prochlorococcus marinus clone ASNC612	92.37	498	isiB	Flavodoxin	Energy Metabolism	Environmental	TTATGACCGTAGGAATTTATTACGCAGCTACAACTGGAAAAACTGAAGGCGTAGCTGATCGTCTTCACAACTTTATCTGTTCAGCAGAAGCACCTAAAGATGTATCTGATGTGGATGATCTTTCAGAATTGGAAGGTCTTGATGGAATTATGTGCGGGATACCTACTTGGAATACAGGTGCCGATGAAGAAAGATCGGGAACTGCAGGGGATTCAATATTAGAAGATATAGGCAAACTAAATTTATCAGGAAAAAAAGTTGCAATTTTTGGCTTAGGAGATTCTTCGGCATACACAGAAAACTATTGTGATGCAATGGAAGAGCTTCATAGCTACTTCACGAAAGCAGGCGGTGAAATGGTCGGTTACGTAGATAAATCTACTGGGGGGACCCGGGCCA	399
301927	JCVI_READ_1092305301927	0.25	0.75	0.5	0	0.25	0	0.25	0.25	0.25	0	0	0	0	1	1	0.5	0.5	0	0.75	0.25	0.25	0.5	0.75	0.5	0.25	0	0.75	0.25	0	1.25	11	0	NA	0.765357	3.49653	Uncultured Prochlorococcus marinus clone ASNC1363	95.98	819	isiB	Flavodoxin	Energy Metabolism	Environmental	TTATGACTGTAGGAATTTATTACGCAACTACTACTGGAAAAACTGAAGACGTAGCTGATCGTCTTCATAACTTTATCTCTTCAGCAGAAGCACCTAAAGATGTATCCGATGTGGATGATCTTTCAGAACTTGAAGGTCTTGACGGAATTATCTGTGGGATACCTACTTGGAATACTGGGGCCGATGAAGAAAGATCTGGAACTGCATGGGATTCAATCTTAGAGGATATTGGTGAACTAAGTTTATCAGGAAAAAAAGTTGCAATTTTTGGTTTAGGAGATTCTTCTACATATACAGAAAACTATTGTGATGCAATGGAAGAACTCCATAGCTACTTCACAAAAGCATGGGCCGAAATGGTCGGTTACGTAGATAAATCTTCTTATACATTTGATGAGT…	618
187196	HF_READ_05187196	0.4	1	0	0.2	0.2	0.2	0.2	0	0.2	0.2	0.6	0.2	0.4	0	0.2	0.6	0.2	0.2	0.8	0.2	0.4	0.4	0.4	0.4	0.2	0	0.4	0.2	0	0.6	9	0	NA	NA	NA	Uncultured Prochlorococcus marinus clone ASNC1363	93.62	856	isiB	Flavodoxin	Energy Metabolism	Environmental	TTATGACTGTAGGAATTTATTACGCAACTACAACTGGCAAAACTGAAGACGCAGCTGATCGTCTTCACAACTTTATTTCTTCTGCAGAAGCACCCAAAGATGTATCTGATGTGGATGATCTTTCAGAATTCGAAGGGCATGATGGGATTATCTGCGGGATACCTACTTGGAACACAGGCGCAGATGAAGAAAGATCAGGAACTGCATGGGATTCAATCTTAGAGGATATTGGTGAACTAAGTTTATCAGGAAAAAAGGTTGCAATTTTTGGTTTAGGAGACTCATCTACTTATACAGAAAATTACTGTGATGCCATGGAAGAACTTCATAGCTACTTCATCAAAGCAGGTGCCGAAATGGTCGGTTACGTAGATAAATCTTCTTATACCTTTGATGAGT…	618
448017	CAM_READ_0081448017	1	0.75	0.25	0.75	0.25	0	0.25	0	0.25	0.25	1.5	0.25	0.5	0	0.5	0.25	0.25	0.5	1	0.25	0.75	1	1	1.25	0.25	0.25	1.25	1	0	1	16.5	6	Yes	0.201315	8.91281	Prochlorococcus marinus str. MIT 9301	96.43	466	isiB	Flavodoxin	Energy Metabolism	Environmental	GAAGCACCTAAAGATGTATCTGATGTAGATGATCTTTCAGAATTTGAAGGTCTTGACGGAATTATCTGCGGGATACCCACTTGGAATACTGGTGCCGATGAAGAAAGATCTGGAACTGCATGGGATTCCATCTTAGAGGATATTGGTGAATTAAGTTTATCAGGAAAAAAAGTTGCAATTTTTGGTTTAGGAGATTCTTCTACTTATACAGAAACTACTGTGATGCAATGGAAGAACTTCATAGCTACTTCACAAAGCAGGCGCCGAAATGGTCGGTTACGTAGATAAATCTTCTTATACATTTGACGAGTACTAAAAGTNTTATTGGAAGTAAAACGTCGTTTTTTAGGTAGGGTAACTTTTAACCCTTCCGTTTTAGGAAGTTTAGGGTAAAGGGTA…	411
926773	HF_READ_04926773	0.5	1	0.5	0.25	0.25	2	1.25	0.5	0.75	0.5	0.5	0	0.5	0.5	2.75	4.5	0.75	2	1.5	2.75	1.75	0.75	1.25	1	1.5	1.5	3	1.75	1	2.5	39.25	1	NA	0.0996552	10.5964	Prochlorococcus marinus str. AS9601	95.33	1001	kaiC	circadian clock protein KaiC	Unclassified	Environmental	GCAGTGGCAAGCTTGCATGCCTGCAGGTCGACTCTAGAGGATCCCCAAATTTGTTGAAGATGCTTATAACAACAATGAGAGAGCAATACTTTTTGCATATGAAGAATCTAGGGCTCAATTGCTTAGGAATGCGACTAGTTGGGGCATAGATTTTGAAAAAATGGAAAGTGATGGGTTATTGAAAATTATTTGTGCATATCCTGAATCAACTGGTTTAGAAGATCACTTACAAATTATAAAAACGCAAATTAATCAATTTAAACCAAAAAGGATGGCAATTGATTCTCTCTCTGCATTAGCTAGAGGTGTAAGTTTGAACGCATTTAGACAGTTTGTTATAGCTGTCACCGGATATACAAAACAAGAAGAGATAGCGGGCTTTTTTACTAATACTGCAGA…	689
30879	JCVI_READ_1095454030879	0.6	0.2	0.6	0.6	0	1.2	1.4	0.4	0.2	0.4	1	0.2	0.4	1.2	3.6	2.8	1.8	1.2	3	1	1.2	1.2	0.6	4	0.8	0	1.8	1.6	0	2	35	4	NA	0.158125	9.56488	Prochlorococcus marinus str. AS9601	95.27	844	kaiC	circadian clock protein KaiC	Unclassified	Environmental	TGGGGGGGGGGGGCTGGGAGTGGGATTTTGAGAATGGGAAGGTGATGGATTATTAAAAATTATTTGGTGGCATATCCTGAATCAACTGGTTTAGAAGATCACTTACAGATTATAAAAACGCAAATTAATCAATTTAAACCAAAAAGAATGGCAATTGATTCTCTATCTGCATTAGCTAGAGGTGTAAGTTTGAATGCATTTAGACAATTTGTAATTGCTGTTACCGGTTATACAAAACAAGAAGAAATAGCAGGCTTTTTTACTAATACTGCAGAAGAATTTATGGGAAGTCATTCTATAACTGATTCTCATATCTCAACTATTACAGACACCATATTGTTGCTTCAATATGTAGAAATAAAAGGTGAGATGGCAAGAGCTTTAAATGTTTTTAAAATG…	565
7145	HF_READ_05007145	0.33	0.17	0.67	0.67	0.17	0.67	0.67	0.83	1	1	0.67	0.33	0.5	0.33	2	2.33	1	1.33	0.83	0.83	1.33	1	1	2.67	0.83	0.67	1.33	1.5	0.17	1.5	28.33	2	NA	0.134306	9.95246	Prochlorococcus marinus str. AS9601	94.98	1269	kaiC	circadian clock protein KaiC	Unclassified	Environmental	GCCCAGTGCCAGGCTTGCATGCCTGCAGGTCGACTCTAGAGGATCCCCCAGAGAAGAGGAGAAGAACTTTAGAAGTTTTAAAGTTAAGAGGTACTGTACATATGAAAGGTGAATACCCATTCACTATGGGAATGGATGGAATAAGTGTGTTTGCCCTAGGAGCTATGAGATTAACGCAAAGATCTTCAAATATTAGGATTAGCTCTGGAGTTAAAGATCTTGATGATATGTGTGGTGGAGGATACTTTCAAGATTCCATCATTCTCGCCACTGGAGCTACTGGTACAGGCAAAACAATGCTTGTATCAAAATTTGTTGAAGACGCTTATAACAATAATGAAAGAGCAATACTTTTTGCATATGAAGAATCAAGGGCTCAATTGCTTAGGAATGCAACTA…	873
971094	HF_READ_04971094	1.5	0.5	0.75	0	0	0	0	0	0.5	0.25	0.25	0	0.5	0.25	1.5	1.75	0.75	1.25	2	0.5	1.5	0.25	1.25	1.25	2	0.5	2	1.25	0.25	2	24.5	0	NA	0.411285	6.55457	Prochlorococcus marinus str. MIT 9215	94.38	1094	kaiC	circadian clock protein KaiC	Unclassified	Environmental	ATTAGCACAAAACTATGAATGATAAGAAATTTGGCAAATCAAATAAAATGCAAGTACAAAAATTACCAACTGGAATAGAGGGTTTTGATGATGTTTGTAGGGGTGGTTTGCCTATATCTCGAAGTACACTAGTTAGTGGTACATCAGGAACTGGTAAAACTGTTTTTTCTCTGCAATATCTACATCATGGAATTTGTAATTTTGATGAGCCTGGAATCTTTGTAACATTTGAGGAATCACCTTTAGATATTATTAGAAATGCCGCAAGTTTTGGTTGGGATTTACAAGAATTAATTGATCAAAATAAACTTTTTATTTTGGACGCATCCCCTGATCCTGATGGTCAGGATGTGGCGGGTAATTTTGACTTGTCTGGTCTTATTGAGAGAATTAGTTATG…	759
352552	HF_READ_05352552	1.33	0.33	0.67	0.33	0	0	0.33	0.33	0.67	0.33	0	0.33	0.33	0.67	1.33	1	1	1	2.33	0.67	1.67	0	0.33	1.33	1.67	0	1.33	1.33	0.67	1.33	22.64	1	NA	0.221986	8.62775	Prochlorococcus marinus str. MIT 9215	93.32	1051	kaiC	circadian clock protein KaiC	Unclassified	Environmental	ACTATGAATGATAGAAATTTGGCAAATCAAATAAAATGCAAGTACAAAAATTACCAACTGGAATAGAAGGTTTTGATGATGTTTGTAGGGGTGGGTTGCCTGTATCTAGAAGTACCCTCGTTAGTGGCACCTCAGGAACTGGTAAAACTGTTTTTTCTCTGCAATATTTACACCATGGAATTTGTAATTTGATGAGCCTGGAATCTTTGTAACATTTGAAGAGTCACCTCTGGATATTATTAGAAATGCCGCAAGTTTTGGTTGGGATTTACAAGAGTTAATTGATCAAAATAAACTTTTTATTTTGGACGCATCTCCTGATCCTGATGGTCAGGATGTGGCGGGTAACTTTGACTTGTCCGGTCTTATTGAAAGAATTAGTTATGCAATTAGAAAATA…	776
407349	JCVI_READ_1092255407349	0.25	0.75	0	0.25	0.25	0.25	0.5	0	0	0.5	0.5	0	0.25	0	0.25	1.5	1.5	0.75	1	1.25	1	0.25	0.75	1.75	0.75	0.5	2	0.5	0.25	1	18.5	0	NA	0.425832	6.41982	Prochlorococcus marinus str. AS9601	94.15	1394	kaiC	circadian clock protein KaiC	Unclassified	Environmental	GAAGGGGTGATGATTACGGACCAATTGCTAGATATGGAGTAGAAGAATTTGTATCTGATAATGTTGTCTTATTGAGAAATGTTCTCGAGTCAGAGAAGAGAAGAAGAACTTTAGAAGTTGTGAAGTTAAGAGGTACTATACACATGAAAGGTGAATATCCATTCACTATGGAATGGATGGAATAGGTGTGTTTGCCTTAGGAGCAATGAGATTAACGCAGAGATCTTCAAATATTAGGATTAGCTCTGGCGTTAAAGATCTTGATGATATGTGTGGCGGAGGATATTTTCAAGATTCCATCATTCTTGCCACTGGAGCTACTGGTACAGGCAAAACAATGCTAGTTTCAAAATTTGTTGAAGATGCTTATAACAATAATGAAAGAGCAATACTTTTTGC…	980
494911	JCVI_READ_1103180494911	0.5	0.25	0	0.25	0.25	0.25	0	0.25	0.5	0	0.5	0.25	0.5	0	1.25	1.25	0.5	0	1	0	0.75	0.5	1.5	0.5	0.5	0.5	1	1	0	0.75	14.5	0	NA	0.755043	3.60866	Prochlorococcus marinus str. AS9601	93.39	1148	kaiC	circadian clock protein KaiC	Unclassified	Environmental	CACGGCTGAGGGAGCATGCGATTAACTCAGAGGTCCTCAAATATTAGGATTAGTTCTGGAGTTAAAGATCTTGATGATATGTGTGGTGGTGGATATTTTCAGGATTCCATCATACTCGCTACAGGAGCTACTGGTACAGGAAAGACAATGCTTGTATCAAAATTTGTTGAAGATGCTTATAACAACAATGAGAGAGCAATACTTTTTGCATATGAAGAATCTAGGGCTCAATTACTTCGGAATGCTACTAGTTGGGGAATAGATTTTGAAAAGATGGAAAGTGACGGGTTATTAAAAATTATTTGTGCTTATCCTGAATCAACTGGTTTAGAAGATCATTTGCAAATTATAAAAACGCAAATTAATCAATTTAAACCAAAAAGAATGGCAATTGATTCA…	835
299648	JCVI_READ_1091139299648	0	0.33	0.67	0	0	0.33	0.33	0	0.67	0	0.33	0	0	0	1	1.33	1	0.33	1	1	0.33	0	0	0.33	1	0	1.67	1.33	0	0.33	13.31	1	NA	0.206088	8.84209	Prochlorococcus marinus str. MIT 9312	91.68	1049	kaiC	circadian clock protein KaiC	Unclassified	Environmental	GTTAGATGGTATTAGTGTGTTGCTCTAGGAGCAATGAGACTCACGCAAAGATCATCAAATATTAGGATTAGTTCTGTGTAAAAGATCTCGACGATATGTGTGGAGGAGGTTATTTTCAGGATTCCATTATCCCTGGCCACAGGAGCCACAGGTACAGGTAAGACAATGCTTGTATCTAAATTCGTAGAAGATGCATATAACAACAATGAAAGAGCAATACTCTTTGCATATGAAGAATCTAGGGCTCAATTACTTAGGAATGCTACAAGTTGGGGAATAGACTTTGAAAAGATGGAAAGTGATGGGTTATTAAAGATTATTTGTGCTTATCCAGAATCAACTGGTTTAGAAGATCACCTGCAAATTATAAAAATGCAAATTAAGCAATTTAAACCAAAG…	853
418153	HF_READ_05418153	0.5	0.5	0.17	0	0	0	0.5	0	0.33	0.5	0	0	0	0.33	0.17	1.17	0.5	1.33	1.33	0	0.83	0.17	0.33	0.83	0.67	0.17	0.83	0.67	0.33	0.67	12.83	1	NA	0.108333	10.3923	Prochlorococcus marinus str. MIT 9301	94.35	1187	kaiC	circadian clock protein KaiC	Unclassified	Environmental	ACTATGAATGATAGAAATTTGGCAAATCAAATAAAATGCGAGTACAAAAATTACCAACAGGAATAGAAGGTTTTGATGATGTTTGTAGGGGTGGATTGCCTGTATCTCGAAGTACACTAGTTAGCGGTACGTCAGGAACTGGTAAAACTGTTTTTTCACTGCAATATTTACACCATGGAATTTGTAATTTTGACGAGCCTGGAATATTTGTAACATTTGAGGAATCACCTTTAGATATTATTAGAAATGCCGCGAGTTTTGGTTGGGATTTACAAGAATTAATTGATCAAAATAAACTTTTTATTTTGGATGCTTCTCCTGACCCTGATGGTCAGGATGTTGCGGGTAACTTTGACTTGTCTGGTCTTATTGAGAGAATTAGTTATGCAATTAGAAAAT…	823
487369	HF_READ_05487369	0.5	0.75	0.25	0	0	0	0.5	0.25	0.25	0.25	0	0	0	0	0.25	1.25	0	0.75	3.25	0	0	0	0.25	0	0.5	0	0.25	0.25	0.5	0.75	10.75	1	NA	0.145955	9.773	Uncultured Prochlorococcus marinus clone HF10-88H9	92.84	652	kaiC	circadian clock protein KaiC	Unclassified	Environmental	GTCAGTGCAAAACTATGAATGATAAGAAATTTGGTAATTCAAATAAAATGCAAGTTCAAAAATTACCAACTGGAATTGAAGGCTTTGATGATGTTTGTAGGGGAGGGTTGCCTGTGTCACGAAGCACACTCGTTAGTGGTACCTCAGGAACTGGTAAAACTGTTTTTTCTCTGCAATATCTGCATCATGGAATTTGTAATTTTGATGAGCCTGGAATTTTTGTAACATTTGAGGAATCACCTTTGGATATTATTAGAAATGCCGCAAGTTTTGGTTGGGATTTGCAAGCATTAATTGATCAAAATAAACTTTTTATTTTGGATGCATCTCCTGATCCTGATGGTCAGGATGTGGCTGGTAACTTTGACTTGTCTGGTCTTATTGAGAGAATTAGTTATG…	513
611307	CAM_READ_0234611307	0	0.33	0.67	0	0	0.33	0	0	0	0	0	0	0	0	0.67	0.33	1.67	0	0.33	0.33	0.67	0.33	0.33	0.33	0.67	0.33	1.33	1.67	0	0.33	10.65	0	NA	0.654974	4.41368	Prochlorococcus marinus str. MIT 9215	91.1	408	kaiC	circadian clock protein KaiC	Unclassified	Environmental	GCTATCTGCATTAGCTAGAGGCGCAAGTTTGAATGCATTTAGACAGTTTGTAATCGCAGTAACTGGTTACACAAAACAAGAGGAGATTGCGGGCTTTTTTACTAATACCGCAGAAGAATTTATGGGAAGTCATTCTATTACTGATTCTCACATCTCAACAATTACAGATACTATATTATTGCTTCAATATGTAGAAATTAAAGGTGAGATGGCTAGAGCTTTAAATGTTTTTAAAATGCGGGGATCATGGCATGATAAACGAATAAGAGAATTTATGATCACAAGTAAAGGGCCAGAAATAAAAGAATTCTTTTCTAATTTCGTAACAAATTTTTAGTGGTGCGCCACACAGAG	354
771058	HF_READ_04771058	1.33	2	0	0	0	0	0.33	0	0	0	0	0	0	0	0.33	1.67	0.33	0	0.5	0	0	0	0	0.33	0.33	0	2.33	0	0	0	9.48	0	NA	NA	NA	Prochlorococcus marinus str. AS9601	95.42	920	kaiC	circadian clock protein KaiC	Unclassified	Environmental	GCAGTGCAGCTTGCATGCCTGCAGGTCGACTCTAGAGGATCCCCACTTAGGAATGCGACAAGCTGGGGAATAGATTTTGAAAAAATGGAAAGTGATGGTTTATTGAAAATTATTTGTGCATATCCTGAGTCAACTGGTTTAGAAGATCACTTACAAATTATAAAAACACAAATTAATCAATTTAAACCAAAAAGAATGGCAATTGATTCTCTCTCTGCATTAGCCAGAGGTGTAAGTTTGAATGCATTTAGACAGTTTGTAATTGCCGTTACTGGTTATACAAAACAAGAGGAGATAGCAGGCTTTTTTACTAATACTGCAGAAGAATTCATGGGGAGTCATTCTATAACTGATTCTCATATCTCAACAATTACAGATACTATATTGTTGCTTCAATAT…	613
647962	JCVI_READ_1103242647962	0.17	0	0.33	0	0	0	0.17	0.17	0	0	0	0	0	0	0.17	0.67	0.5	0.17	0.83	0.17	0.83	0	0.5	0.67	0.5	0	0.17	0.17	0	0.67	6.86	0	NA	NA	NA	Prochlorococcus marinus str. AS9601	94.27	480	kaiC	circadian clock protein KaiC	Unclassified	Environmental	CTATGAATGATAAGAAATTTGGCAAATCGAATAAAATGCAAGTACAAAAATTACCAACTGGAATAGAAGGCTTTGATGATGTTTGTAGGGGTGGGTTGCCTGTTTCACGAAGTACACTCGTTAGTGGTACGTCAGGAACTGGTAAAACTGTTTTTTCACTCCAATATTTACACCATGGAATTTGCAATTTTGATGAGCCTGGAATCTTTGTAACATTTGAGGAATCACCTCTAGATATTATTAGAAATGCAGCGAGTTTTGGTTGGGATTTACAAGAATTAATTGATCAAAATAAACTTTTTATTTTGGATGCTCGCATGACCCTGCAAGCTTAA	335
43397	HF_READ_05043397	0.25	0	0	0.25	0	0	0.25	0	0	0.25	0	0	0	0	0.25	1	0	0.5	1.25	1	0	0	0.25	0	0.25	0	0.25	0.5	0.25	0	6.5	0	NA	NA	NA	Uncultured Prochlorococcus marinus clone HF10-88H9	93.24	620	kaiC	circadian clock protein KaiC	Unclassified	Environmental	TTTAGTACAAAACTATGGATGATAAGAAATTTGGCAAATCAAATAGAATGGAAGTACAAAAATTACCAACTGGAATCGAAGGCTTTGATGATGTTTGCAGGGGTGGGTTGCCTGTATCTCGAAGTACGCTCATAAGTGGCACCTCTGGAACTGGTAAAACTGTTTTTTCTCTGCAATATTTGCACCATGGAATTTGTAATTTTGATGAGCCTGGAATCTTTGTTACATTCGAGGAATCACCTTTAGATATTATTAGAAATGCCGCAAGTTTTGGTTGGGATTTACAAGAATTAATTGATCAAAATAAACTTTTTATTTTGGATGCTTCTCCTGATCCTGATGGTCAGGATGTGGCGGGTAACTTTGACTTGTCAGGTCTTATTGAGAGAATTAGTTATG…	477
101628	JCVI_READ_1093012101628	0	0	0	0	0	0	0.5	0	0	0.25	0	0	0	0.25	0.25	0	0.25	0.5	0.75	0	0.5	0	0.5	0	0.5	0	1	0.25	0.25	0	5.75	0	NA	NA	NA	Prochlorococcus marinus str. MIT 9312	92.15	1326	kaiC	circadian clock protein KaiC	Unclassified	Environmental	ACCTCTAGACATAATTAGAAATGCCGCGAGCTTTGGTTGGGATTTACCAAGAATTAAATGATCAAATAAACTTTTTATTTTGGATGCTTCTCCTGACCCTGATGGTCAGGATGTTGCGGGTAACTTTGACTTGTCTGGTCTTATTGAGCGAATTAGTTATGCAATTAGAAAATATAAAGCTAAAAGAGTCGCAATAGATTCAATAACTGCAGTCTTTCAACAGTATGATGCAATTTATGTTGTTAGACGGGAAATATTTAGACTCATAGCAAGATTAAAAGAAATAGGTGTGACGACAGTTATGACTACAGAAAGGGTAGATGATTATGGACCAATAGCAAGATATGGAGTAGAAGAATTTGTATCTGATAATGTTGTCTTATTAAGAAATGTTCTTGA…	1029
755230	JCVI_READ_1755230	0	0.4	0.4	0.2	0	0	0.2	0	0.2	0.2	0	0	0	0.2	0.2	0.2	0.6	0	0	0	0.2	0.2	0.4	0.2	0	0.4	0.4	0.6	0	0.4	5.6	0	NA	NA	NA	Uncultured Prochlorococcus marinus clone HOT0M-6C1	90.69	973	kaiC	circadian clock protein KaiC	Unclassified	Environmental	TGGGAATAGATGGTATAAGTGTGTTTGCCCTCGGTGCAATGAGACTTACGCAAAAGATCTTCCTAATATTAGAATTAGTTCAGGGGTTAAAGACCTGGACGAAATGTGTGGAGGAGGTTACTTTCAAGATTCAATTATCCTCGCCACAGGTGCTACTGGTACAGGTAAGACTATGCTTGTATCAAAATTTGTAGAAGACGCTTATAACAATAGTGAAAGAGCAATCCTTTTCGCGTATGAGGAATCTAGGGCTCAATTGCTTAGAAACGCTACTAGTTGGGGAATAGATTTTGAAAAAATGGAAAGTGATGGCTTATTAAAAATTATTTGTGCATATCCTGAATCAACTGGTTTGGAAGATCATTTACAAATCATAAAAACTCAAATTAATCAATTTAA…	825
81696	JCVI_READ_3081696	0	0	0	0	0	0	0	0	0	0.4	0	0	0	0.2	0	0.4	0.4	0.2	1	0.2	0.4	0	0	0	1	0.2	0	0.8	0	0	5.2	0	NA	NA	NA	Uncultured Prochlorococcus marinus clone HF10-88H9	94	652	kaiC	circadian clock protein KaiC	Unclassified	Environmental	CTATGAATGATAAGAAAATTGGCAAATCAAATAAAATGCAAGTACAAAAATTACCAACTGGAATAGAGGGTTTTGATGATGTTTGTAGGGGTGGATTGCCTGTATCTCGAAGTACTCTAGTTAGTGGCACTTCAGGAACTGGTAAAACTGTTTTTTCTCTGCAATATTTACACCATGGAATTTGTAATTTTGATGAGCCTGGAATCTTTGTAACATTTGAGGAATCACCCTTAGATATTATTAGAAATGCCGCAAGTTTTGGTTGGGATTTACAAGAATTAATTGATCAAAATAAACTTTTTATTTTGGACGCATCTCCTGATCCTGATGGTCAAGATGTGGCTGGTAACTTTGACTTGTCTGGTCTTATTGAGAGAATTAGTTATGCAATTAGAAAAT…	475
674416	JCVI_READ_1093017674416	0.2	0.4	0.4	0.2	0.2	0.6	0.4	0	0.8	0.4	0	0.2	0	1.2	2.8	2.4	0.8	2	1.2	0.2	0.6	0.8	0.2	1.6	1.4	0.4	1	1	0.2	1.4	23	4	Yes	0.0821575	11.0399	Prochlorococcus marinus str. AS9601	95.03	1503	kaiC	circadian clock protein KaiC	Unclassified	Environmental	CGTAAGACTACAGAAGGGATTGTGTTTTGGACCATTGCTAGATATGGGGAGAAGAATTTTTTCTGATAATGTTGTCTACTAAGAAATGTTCTTGAGTCAGAGAAGAGAAGAAGAACTTTAGAAGTTTGAAGTTAAGAGGTACTGTACATATGAAAGGTGAGTATCCATTCACTATGGGGAATGATGGAATAAGTGTGTTTGCCCTAGGAGCAATGAGATTAACGCAAAGATCCTCAAACATTAGAATTAGCTCTGGAGTCAAGGATCTTGATGATATGTGTGGTGGAGGTTATTTTCAAGATTCCATCATTCTCGCCACTGGAGCTACTGGTACAGGTAAAACCATGCTTGTATCAAAATTTGTTGAAGATGCTTATAACAATAATGAAAGAGCAATAC…	1006
18791	A9601_18791	0.67	0.67	0.5	0.5	0.17	0.5	0	0.33	0.17	1	0	0.17	0.17	1	1.83	1.5	0.5	1.17	1.67	1.67	1	0.33	0.83	2	1.33	0.5	0.83	1	0.5	0.83	23.34	0	NA	0.543986	5.35277	Prochlorococcus marinus str. AS9601	100	2522	metC	Cystathionine beta-lyase family protein involved in aluminum resistance	Amino Acid Metabolism	Genomic	ATGACTCTTGACAATAACTTAAAACTGGCTGAACACACTGTTTTTTCTGTAGAAGAGAGTTTAAGTAAAGTTTTCCAAGAAAGGTCCAATCAGGTTTTCCAGAAATTAGAAAATATTTTGACAATTTTTAAGGAAGAAAAAGTTTCTACTAGTCATTTCAATCAATCTTCTGGTAGTGGTCATGATGATATATCTAGAGAAAAAATTGATGCAGTTTTTGCAAGATTATTTCTTGCTGAAAAGGCTGCTGTGAGGATGCAATTTGTGAGTGGAACCCATGCAATAAGTTCTGTCTTATTTGGAATTCTTCGACCCGGAGATGTAATGTTATCTCTTACAGGACAACCATATGACACGTTAGAAGAAGTCATAGGAATAAGGGGAGGAGGAAAAGGATCA…	1293
504922	HF_READ_05504922	1.67	0	0	0	0	1	0	0	0	0.83	0	0	0	1	1	0.83	0.17	0.83	3.67	1.5	0.17	2.5	1.5	1.17	0.17	0	0	1	0	0	19.01	0	NA	0.89394	2.29539	Prochlorococcus marinus str. AS9601	96.38	1029	metC	Cystathionine beta-lyase family protein involved in aluminum resistance	Amino Acid Metabolism	Environmental	AGTCAGTGCAGCTTGCATGCCTGCAGGTCGACTCTAGAGGATCCCCGATTAATTTTACAGGGTTTGTTTTTAGCACCACAAATTGTTCACGAATCACTAAAAGGTGCTGATATGATTGCAGCAGTGTTTAAAAATTTGGGTTTTAAGGTTTTACCAGAGCCAGCAACTTATAGATCTGATCTTATTCAGTCAGTAAGATTGAACAATCCTGAATTGGTACAAAAAGTTTGTCAATCTTTTCAAAATTCTTCACCAGTAGATTCTTTTCTCAATGTTGTTCCATCATTAATGGATGGATATGATTCAAAATTATTAATGGCAGGAGGTACATTTATTGAAGGTAGTACAAGTGAATTTTCTGCTGATGCTCCTTTGAGAGATCCTTACAATATTTTTGTT…	655
640495	JCVI_READ_640495	0.33	0.17	0	0.17	0.33	0.67	1	0.67	0.17	0.33	0.67	0	0	1.5	1.33	0.5	0.5	1	0.67	0.33	1.17	0.33	0.17	1	1.17	0	0.83	1	0.17	0.5	16.68	2	NA	0.128123	10.0611	Prochlorococcus marinus str. MIT 9301	96.49	1814	metC	Cystathionine beta-lyase family protein involved in aluminum resistance	Amino Acid Metabolism	Environmental	TACAGGGCCAACCATAAGGACAACGTTAGAAGAAAGTCATAGGAAATAAAGGGGAGGAGGTAAAAGGCTCACTTAAAGATTTTGAGATTGAATATAAGCAAATAAATATCTGTGAGAATTTTGATTCTTTTGAAGAAAAAATTGTTCATTCTTTTAAAGAAAATTCATGCAAAATTAGTATTCATACAAAAAAGTTGTGGATATAGTTGGAGAAAGTCTCTTACGAATCATCAGATAGAGAAAATTTGCAGTCTTATTCATTCTCTTGATCCTAACTGTATATGTTTTGTTGATAACTGTTATGGGGAGCTTGTTGAAGATAGTGAACCAATTTCTAAAGGGGCAAATATAATTGCTGGATCATTGATTAAAAATTTGGGAGGAACAATCGTTCCTACT…	1104
2640	HF_READ_05002640	0.6	0	0	0	0.2	0.2	1	0	0.2	0	0.4	0.2	0.2	0.8	1.2	0.4	0.6	0.2	2	0.8	0.2	0.8	0.2	0.6	0.4	0.6	0.8	0.4	0.4	0.4	13.8	0	NA	0.486768	5.91508	Prochlorococcus marinus str. AS9601	97.61	1051	metC	Cystathionine beta-lyase family protein involved in aluminum resistance	Amino Acid Metabolism	Environmental	CGGCAGCCGGACAAGGTGCAGCTTGCATGCCTGCAGGTCGACTCTAGAGGATCCCCTTAGCACCACAAATTGTTCACGAATCACTAAAAGGTGCTGATATGGTTGCAGCAGTCTTTAAAAATTTGGGATTTAAGGTTTTACCAGAGCCAGCAACTTATAGATCTGATCTTATTCAGTCAGTAAGATTGGATAATCCTGACTTGGTACAAAAAGTTTGTCAATCTTTTCAGAATTCTTCACCAGTAGATTCTTTTCTGAATGTTGTTCCATCATCAATGGATGGATATGATTCGAAATTATTAATGGCAGGAGGTACTTTTATTGAAGGTAGTACAAGTGAATTTTCTGCTGATGCCCCTCTAAGAGATCCTTACAATATTTTTGTTCAAGGTGGTTCTC…	642
992445	HF_READ_04992445	0.33	0.67	0	0.33	0	0	0	0	1	0.33	0.33	0.33	0	1	0.67	0	0.67	0.67	1	0.33	0.67	0.67	0	0	0.33	0.33	2.67	0.67	0.33	0	13.33	1	NA	0.203218	8.88839	Prochlorococcus marinus str. MIT 9301	95.23	1118	metC	Cystathionine beta-lyase family protein involved in aluminum resistance	Amino Acid Metabolism	Environmental	TTTTTATTGTATGACATAACATAACAATAACTAAATGCTGAAACGTGTTCTTTCTTCGAAGAGGAGTTTAAGTAAAGTTTCCAGAAAGTCCATCAGGTTTTCCAGAAATTAGAAATATTTTGACATTTTAAGGAAGAAAAAGTTTCTACTAGTCATTTCAATCAATCTCTGGTAGTGGTTATGATGATATATCTAGAGAAAAAATTGATGCGGTTTTTGCAAGATTGTTTCTTGCTGAAAAGGCAGCTGTTAGGATGCAATTTGTAAGTGGAACTCATGCAATAAGTTCTGTCTTATTTGGAATTCTTAGACCTGGAGATGTAATGTTATCTCTTACAGGACAACCATATGACACGTTAGAAGAAGTCATAGGAATAAGAGGAGGAGGAAAAGGCTCAC…	814
30910	HF_READ_05030910	0	0	0	0	0	0	0	0	0.75	0	0	0.25	0	0.5	1	0.75	0.25	0.75	1	1.25	0.5	0.25	0.25	1	0.25	0.5	0.5	1	0.5	0.75	12	0	NA	0.403665	6.63618	Prochlorococcus marinus str. MIT 9301	96.35	1229	metC	Cystathionine beta-lyase family protein involved in aluminum resistance	Amino Acid Metabolism	Environmental	AGCAAAGGGGCAGTGGCAAGCTTGCATGCCTGCAGGGTCGACTCTAGAGGATCCCCTGTTTCTTGCTGAAAAGGCAGCTGTGAGGATGCAATTTGTAAGTGGAACGCATGCAATAAGTTCTGTCTTATTTGGAATTCTTAGACCTGGAGATGTAATGTTATCTCTTACAGGACAACCATATGACACGTTAGAAGAAGTAATAGGAATAAGGGGAGGAGGAAAAGGCTCACTTAAAGATTTTGATATTGAATATAAGCAAATAAATATCTGCGAGAATTTTGATTCTTTTGAAGAAAAAATTGCTCATTCTTTTAAAGAAAATTCATGCAAATTAGTATTCATACAAAAAAGTTGTGGATATAGTTGGAGAAAGTCTCTTACGAATCATCAGATAGAGAA…	795
938550	HF_READ_04938550	0.5	0.75	0	0	0.25	0	0.5	0.25	0	0.5	0	0	0	0.25	0	0	0	0.5	1.25	0.5	0.75	0.5	0.25	0.25	0	0.25	0	0.5	0.5	0.5	8.75	3	NA	0.245835	8.28136	Prochlorococcus marinus str. MIT 9301	95.2	1312	metC	Cystathionine beta-lyase family protein involved in aluminum resistance	Amino Acid Metabolism	Environmental	CTTACAGGAAAACCATATGACACCATTGGAAGAAGTCATAGGAATAAGGGCAGAGGTAAAGGCTCACTTAAAAATTTTGATATTGAATATAAGCAAATAAATATCTGCGAGAATTTTGATTCTTTTGAAGAAAAAATTGTTCATTCTTTAAAGAAAATTCATGCAAATTAGTATTTATACAAAAAAGTTGTGGATATAGTTGGAGAAAATCTCTTACGAATAATCAGATAGAGAAAATTTGTAGTCTGATTCATTCTCTTGATCCTCACTGTATATGTTTTGTTGATAACTGTTATGGGGAGCTCGTCGAAGATAGTGAACCAATTTCTAAAGGGGCAAATATAATTGCTGGATCATTGATTAAAAATTTGGGAGGAACAATCGTTCCTACTGGTGGGT…	884
84397	HF_READ_05084397	0	0.33	0	0	0.33	0.67	0	0	0	0	0.33	0	0	1	0.33	0	0.33	0	0.33	0.33	0.67	0	0	0	0	0.33	0	0	0.33	0.33	5.64	0	NA	NA	NA	Prochlorococcus marinus str. MIT 9215	94.21	474	metC	Cystathionine beta-lyase family protein involved in aluminum resistance	Amino Acid Metabolism	Environmental	TAATGACATTAAATAAAAACTTAAAACTTGCTGAAAACGCTGTTTTTTCTGTAGAAGAGAGTTTAAGTAAAGTTTTTCAAGAAAGATCCAATCAGGTTTTTCAGAAATTACAAAATATTTTGACAATTTTTAGGGAAGAAAAAGTTTCTACTAGTCATTTCAATCAATCCTCTGGTAGTGGTCATGATGATATATCTAGAGATAAAATTGATGCAGTTTTTGCAAGATTATTTCTTGCTGAAAAGGCAGCCGTGAGGATGCAATTTGTAAGTGGAACGCATGCAATAAGTTCTGTCTTATTTGGAATTCTTGGGGATCCTCTAGAGTCGACTGCAGGCATGCAAGCTTGGCAATTGGT	358
18380	HF_READ_05018380	0	0.75	0	0	0	0.25	0	0.25	0	0	0	0.5	0	0.25	0.25	0	0	0.25	0.25	0.5	0.25	0	0	0.5	0	0	0	0	1	0.25	5.25	0	NA	NA	NA	Prochlorococcus marinus str. MIT 9312	92.67	642	metC	Cystathionine beta-lyase family protein involved in aluminum resistance	Amino Acid Metabolism	Environmental	TTAATGACATTAAACAATAACTTAAAACTGGCAGAAAATGCTGTTCTCACCTTAGAAGAGAGTTTAAGTAAAGTTTTTCAAGAAAGGTCTAATCAGGTTTTCCAGAAATTAGAAAATATTTTGACAATTTATAAGGAAGAAAAAGTTTCTACTAGTCATTTCAATCAATCCTCTGGTAGTGGTCATGATGATATATCTAGAGAAAAAATTGATGCGGTTTTTGCGAGATTGTTTCTCGCTGAAAAGGCCGCTGTGAGAATGCAATTTGTAAGTGGAACACATGCAATAAGTTCTGTCTTATTTGGAATTCTTAGACCTGGAGATGTGATGTTATCTCTTACAGGACAACCATATGACACATTAGAAGAAGTAATAGGATAAGGGGAGGCGGTAATGGCA…	533
950656	JCVI_READ_1108829950656	0	0.33	0	0	0	0.33	0.33	0	0.33	0	0.67	0	0	0.33	0.33	0.67	0	0.33	1	0	1	0	0.33	0.67	1	0	0.33	0	0	1	8.98	0	NA	NA	NA	Prochlorococcus marinus str. MIT 9215	92.23	1185	mfs	multidrug efflux transporter, MFS family, permease of the major facilitator superfamily; proline/betaine transporter	Membrane Transport	Environmental	TTGTGATTAGTCCAAATAATTTACAAATTAGAAAAAATTGGTGGATTCAATTTCCATATCATTTGAGGTTAATAACCAAGATAAGATTTTTCGCTGCATTTGGAGCAGGAGGTGTAATTTATTTAACATCACTTATTTTTAATAGCATAGGATTATCGGCAACAGATATTGGCTTGGGGTTTACCATTTCAGCAATAATTGGAACCGTAACAAGACTCTTTACAGGTAAATATCTTAATAAAACAGGGAAAATACAATTTCCAATAGTTACTTCTTCAATTCTAAGTATTGTCGCTAGCTTATGCCTTATTTTTTCAAGAGATAGCTCTTTATACATAATTGGACAATCATTTGTTGGGGCTGCTGCTGGAATATATTGGCCTGCTGCCGAATTTGGTG…	1010
365671	JCVI_READ_365671	0	0.5	0	0	0	0.25	0	0.25	0.25	0.25	0	0	0	0	0.75	0.75	0.25	0.25	0.25	1	0	0.25	0.25	0	0	0.25	0.25	0.25	0.25	0.75	7	0	NA	NA	NA	Prochlorococcus marinus str. MIT 9215	95.92	731	mfs	multidrug efflux transporter, MFS family, permease of the major facilitator superfamily; proline/betaine transporter	Membrane Transport	Environmental	TTGTGATTAGTCCAAATAGTTTACAAATTAGCAAAAATTGGTGGATTCAATTTCCATATCATTTGAGGTTAATAACCAAGATAAGATTTTACGCTGCATTTGGAGCAGGAGGTGTTATTTATTTAACATCACTTATTTTTAATAACATAGGATTATCGGCAACAGATATTGGCTTGGGGTTTACCATCTCAGCAATAATTGGAACGGTAACAAGACTCTTTACAGGTAATTATCTTAATAAAACAGGGAAAATACAATTTCCAATAGTTACATCTTCAATACTAAGTATTGCCGCTAGCTTATGCCTCATTTTTTCAAGAGATACCTTTTTATACATAATTGGACAATCATTTGTTGGGGCTGCTGCAGGTATATATTGGCCTGCTGCCGAATTTGGGG…	477
900464	HF_READ_04900464	0	0.2	0.2	0	0	0.2	0	0	0.2	0.2	0	0.2	0.2	0.2	0.4	0.4	0.4	0.2	0.6	0.4	0	0	0.4	0.6	0.6	0.2	0	0.2	0	0.2	6.2	0	NA	NA	NA	Prochlorococcus marinus str. MIT 9215	94.11	952	mfs	multidrug efflux transporter, MFS family, permease of the major facilitator superfamily; proline/betaine transporter	Membrane Transport	Environmental	TAGTGATTAGTCCAAATAGTTTACAAATTAGCAAAAATTGGTGGATGCAATTTCCATATCATTTGAGGTTAATAACCAAGATAAGATTTTTCGCTGCATTTGGAGCAGGAGGTGTTATTTATTTAACATCACTTATTTTTAATAACATAGGATTATCGGCAACAGATATTGGCTTAGGGTTTACCATTTCAGCAATAATTGGAACAGTAACAAGACTCTTTACAGGTAATTATCTTAATAAAAAAGGGAAAATACAATTTCCAATAATTACTTCTTCAATACTAAGTATTGCCGCTAGTTTATGCCTAATTTTTTCAAGAGATACTTTTTTGTACATAATTGGACAATCACTTGTTGGGGCTGCTGCAGGAATATATTGGCCTGCTGCCGAGTTTGGGG…	675
921443	HF_READ_04921443	0	0	0.2	0	0	0.2	0.4	0	0	0.4	0	0	0.4	0.8	0.4	0.2	0.8	0.2	0	0.6	0.2	0	0.2	0	0	0	0.4	0.2	0	0.2	5.8	0	NA	NA	NA	Prochlorococcus marinus str. MIT 9301	97.87	478	mfs	multidrug efflux transporter, MFS family, permease of the major facilitator superfamily; proline/betaine transporter	Membrane Transport	Environmental	TGTTTTTTCNAAACGACCGGCAGNGGCAGCTTGCATGCTGCAGGTCGACTCTAGAGGATCCCCTGGCGGGTTCATTTTTATTATTTATTTCTAGTTATTTAAATATCCCAGCGTTTTATTTAATTTCTTTGTCATTGATTTTAGTAAGTTTAGGGACTGCTTCATTTCTTCCAACATCAACAGATGTCGTTTACAGAATAGCTCCTTCAAATAAAAAAGGTTTTGCACTTGCTCTATTATCACAATGTTTTGCTATGGGTTATTTTTTTGGACCATTTATTTCAGGACGCATATTAGATCTATTTGGTTATGCTTCAATAATCTGGCTTTCAATTTCTTGTTGTTGCTTTATTGCCTTTACAATTCTATTCAAGAGATTATTTTAATTAATCTTTTCTA…	414
1282	HF_READ_05001282	0	0	0	0	0	0	0.4	0	0	0	0	0	0	0.2	1.4	0	0	0	0.6	0	0.8	0.4	0	1	0	0	0	0.4	0	0.4	5.6	0	NA	NA	NA	Prochlorococcus marinus str. MIT 9301	96.76	585	mfs	multidrug efflux transporter, MFS family, permease of the major facilitator superfamily; proline/betaine transporter	Membrane Transport	Environmental	TAGTGATTAGTCCAAATAGTTTACAAATTAGCAAAAATTGGTGGATTCAATTTCCATATCATTTGAGGTTAATAACCAAGATAAGATTTTTTGCTGCATTTGGAGCAGGAGGTGTTATTTATTTAACATCACTTATTTTTAATAACCTAGGATTATCGGCAACAGATATTGGCTTGGGGTTTACCATTTCAGCAATAATTGGAACCGTAACAAGACTATTTACAGGTAATTATCTTAATAAAACAGGAAAAATACAATTTCCAATAGTTACTTCTTCAATACTAAGTATTGCCGCTAGCTTATGCCTTATTTTTTCAAGAGATACTTTTTTGTACATAAGGGGATCCTCTAGAGTCGACCTGCAGGCATGCAAGCTTGGCCACTTGA	387
11511	A9601_11511	0	0	0	0	0	0	0	0	0	0	0	0.5	0.25	0	1	0	0.25	0	0.5	0.5	0.5	0.25	0	0.5	0.25	0	0.5	0	0.25	0.25	5.5	0	NA	NA	NA	Prochlorococcus marinus str. AS9601	100	1770	mfs	multidrug efflux transporter, MFS family, permease of the major facilitator superfamily; proline/betaine transporter	Membrane Transport	Genomic	GTGATTAGTCCAAATAGTTTACAAATTAGCAAAAATTGGTGGATTCAATTTCCTTATCATTTGAGGTTAATAACTAAGATAAGATTTTTCGCTGCATTTGGAGCAGGAGGTGTTATTTATTTAACATCACTTATTTTTAATAACCTAGGATTATCGGCGACAGATATTGGCCTGGGATTTACCATTTCAGCAATAATTGGAACCGTAACAAGACTCTTTACAGGTAATTATCTTAATAAAACGGGAAAAATACAATTTCCGATAATTACTTCTTCAATACTAAGTATTGCCGCTAGCTTATGCCTCATTTTTTCAAGAGATACTTTTTTGTACATAATTGGGCAATCACTTGTTGGGGCTGCTGCAGGAATATATTGGCCTGCTGCCGAGTTTGGGGTG…	1230
938362	HF_READ_04938362	0	0	0	0	0	0.5	0	0.75	0	0	0	0	0	0.75	1	1.25	1.5	0	0	1	0	0	1	0	1.25	0	0	0	0	0.75	9.75	2	Yes	0.159377	9.54785	Prochlorococcus marinus str. MIT 9215	94.6	662	mfs	multidrug efflux transporter, MFS family, permease of the major facilitator superfamily; proline/betaine transporter	Membrane Transport	Environmental	TTGTGATTAGTCCAAATAGTTTACAAATTAGAAAAAATTGGTGGATTCAATTTCCATATCATTTGAGGTTAATAACCAAGATAAGATTTTACGCGGCATTTGGAGCAGGAGGTGTTATTTATTTAACATCACTTATTTTTAATAACATAGGATTATCGGCAACAGATATTGGCTTTGGGTTTACTATTTCAGCAATAATTGGAACCATAACAAGACTCTTTACAGGTAATTATCTTAACAAAACAGGGAAAATACAATTTCCAATACTTACCTCTTCAATTCTAAGTATTGCCGCTAGCTTATGCCTAATTTTTTCAAGAGATACTTTTTTGTACATAATTGGACAATCATTTGTTGGCGCTGCTGCAGGAATATATTGGCCTGCTGCCGAGTTTGGGG…	473
319111	JCVI_READ_1104230319111	1.5	0.75	0.75	0.75	1.5	3	0.5	0.5	0.25	1.75	1	0.5	1	2.25	4.5	5.75	3.25	1.75	4.5	1.25	1.5	1.25	1.75	2.75	4	1	3.75	2.25	1.25	2.25	58.75	4	NA	0.0464017	12.1129	Prochlorococcus marinus str. AS9601	95.43	523	ndhI	NADH dehydrogenase subunit I	Energy Metabolism	Environmental	ATCCCTGCGAACATTTCTTTAGTACTGTTGACTTGTCAACCAACAAAGTGGTGCTGGAATCCTAAGTTGGAACATATGGAGACAACCAGTTGGTTTTATAGTCTTTTGGATTTGTGCTCTTGCAGAATGTGAGAGACTTCCGTTTGACTTACCCGAAGCTGAAGAAGAATTAGTTGCAGGATATCAAACTGAATATGCAGGGATGAAATTCGCATTGTTCTACCTGGGTAGTTACATTAATTTAATTCTTTCCGCTTTATTAGTATCAATACTTTATTTGGGAGGATGGGGTTTTCCTATTCCAGTTGAATTAATAGCTAAGTTTCTTAATTTACCTATTAATGCAC	347
596075	HF_READ_05596075	0.33	0	0.67	0.33	0.33	2.83	0.33	0.83	0.33	2.5	1.67	0	0.17	1.5	4.33	3.67	1.33	1	3.67	1.67	3.33	0.67	1.17	1.33	3.67	0.83	2.5	1.33	0.83	1.83	44.98	0	NA	0.248662	8.23713	Prochlorococcus marinus str. MIT 9301	96.02	545	ndhI	NADH dehydrogenase subunit I	Energy Metabolism	Environmental	GGCGGTGGCCAAGCTTGCATGCCTGCAGGTCGACTCTAGAGGATCCCCAAGTACTATTGATATTGTTAACCAACAAAGCGGTGCTGGAATCCTAAGTTGGAATATATGGAGACAGCCAGTTGGTTTTATAGTCTTCTGGATTTGTGCTCTTGCAGAATGTGAGAGACTTCCATTTGACTTACCTGAAGCTGAAGAAGAATTAGTTGCAGGATATCAAACTGAATATGCAGGGATGAAATTCGCATTGTTCTATCTTGGTAGTTACATTAATTTAATCCTTTCAGCATTATTGGTATCAATACTTTATTTAGGAGGATGGGGTTTTCCTATTCCAGTTGAATTAATAGCTAAGTTTTTAAATTTGCCTATCAATGCCC	377
540610	HF_READ_05540610	1.33	0	0.17	0.5	1	1.5	0.5	0	1.67	0.83	0.83	0.5	0.83	2.17	2	2.67	0.33	2	4	1.17	1.33	1	3.83	2.83	1.33	1.33	1.33	1.83	0.83	2.33	41.97	0	NA	0.619559	4.72983	Prochlorococcus marinus str. AS9601	92.49	805	ndhI	NADH dehydrogenase subunit I	Energy Metabolism	Environmental	ATCACATAATGAAATTTGGAATAAAATGTTAATGCCTTGGGAAGTTTGTGGTGGAGAAGTATGTTCCTATAAATCTCCCCAGTAGTGATGGGTAATGACCAAAGAACAAAAAAAAAGGAACTTAGAAATATTCATAGATTTTGGGGTTGTATTTTTGCGGAAATTGTGTGAATATTGCCCAACTAATTGTCTGTCAATGACCGAAGAATATGAATTAGCTACTTTTGACAGACACAATTTAAATTTCGATAATGTCGCACTTGGCAGACTACCCACAAATGTTACAACAGATCCTTCAGTTAAACCTCTAAGAGAACTTGCCTATCTTCCAAAAGGTGTCATGGATCCTCATGAAATCCCAGCTTCAGATGCAAGAGTTGGTAAATTACCGGAAGAAGT…	737
475804	HF_READ_05475804	0.83	0.5	0.83	0.17	0.67	0.67	0.33	0.17	1.67	1.5	0.67	0.33	0	1.33	4.33	1.83	2.5	1	3.17	1.5	2.67	0.5	2.33	1.33	1.83	0.67	1.5	2.5	0.67	1.33	39.33	0	NA	0.290968	7.736	Prochlorococcus marinus str. AS9601	94.89	987	ndhI	NADH dehydrogenase subunit I	Energy Metabolism	Environmental	TTATGTCCATTGCAATAACAACTCAAATTATTTGTTTTACAATTTTATCTTTAGTTATCCTTATTGGAGCACTTGGTGTTGTACTACTCGAAAGTATTGTTTATTCAGCCTTTCTTCTAGGAGGAGTTTTCATGAGTGTGGCTGGATTATATCTTCTTTTAAATGCAAGTTTTGTTGCTGCAGCGCAAGTTTTAGTTTATGTGGGTGCAGTTAATGTATTAATAATTTTTGCAATAATGCTAGTCAATAAAAAAGAAGATTTAAAGCCCATCAATGACATTAAATCGAGAAGAATCATATCAACAACAATATGTTTAACCCTGCTAAGCCTTTTAATTAGAGTTGACTTGACTAATGTATGGAGCCTATCAAGTCCTCAAAACTCTATAGGAGAAGAAT…	673
175539	JCVI_READ_1092257175539	0	0	0	0.5	0.5	1.5	1	0	0	2	0	0.5	0.5	4.5	2.5	2.5	2.5	2.5	4	0.5	1	0.5	1.5	2	2	0.5	0.5	2.5	1	2	39	0	NA	0.248383	8.2491	Prochlorococcus marinus str. MIT 9215	93.2	446	ndhI	NADH dehydrogenase subunit I	Energy Metabolism	Environmental	GAAGGTTGAGATTGAATCGTCACCAACAAAGTGGTGCTGGAATTCTAAGTTGGAATATTTGGAGACAACCTGTTGGTTTTATAGTTTTTTGGATTTGTGCTCTTGCAGAATGTGAAAGACTTCCATTTGACTTACCTGAAGCTGAAGAAGAATTAGTTGCGGGATACCAAACTGAATATGCAGGAATGAAATTTGCTTTGTTCTACCTTGGTAGTTACATTAATTTAATCCTTTCAGCTTTATTAGTATCAATACTTTATTTGGGAGGATGGGGTTTTCCGATTCCAGTTGAATTAATAGCTAAGTTTTTAAATTTACCCATAAATGCCC	330
827961	JCVI_READ_1108839827961	0.83	0.17	0.33	0.17	0.5	1.33	1.33	0.17	1	0.17	1	0.17	0	1.67	2.83	1	1.17	1.33	3.17	0.5	0.17	0.33	0.83	1.33	0.5	1.17	2.83	1.5	0.67	1.5	29.67	1	NA	0.0430638	12.2184	Prochlorococcus marinus str. AS9601	96.39	930	ndhI	NADH dehydrogenase subunit I	Energy Metabolism	Environmental	AAATGAAAAATTTCCTTCAACAAATAAATAGCTATATCAAAGAAGCATTCAATGCTGGTAAATATTTATATAATGGCTTATCAGTAACTTTTGATCATCTTCGAAGAAGACCTGTTACTGTCCAATATCCATATGAAAAATTAATACCATCTGAAAGATATAGAGGAAGAATACATTATGAATTTGATAAATGTATTGCTTGTGAAGTTTGCGTGAGAGTATGCCCCATAAATCTACCAGTCGTTGATTGGGTAATGAATAAAGAAACCAAAAAAAAGGAACTTAGAAATTATTCCATAGACTTTGGAGTTTGTATATTTTGTGGAAATTGCGTTGAATATTGTCCAACTAATTGTCTTTCAATGACCGAAGAATATGAATTAGCTACTTTTGACAGAC…	681
866955	JCVI_READ_1092405866955	2	0.5	0	0	0	3	0.5	0.5	1	0.5	1.5	0.5	0	0	2.5	1.5	2	1	3	0.5	1	0.5	0.5	0.5	1	0.5	1	1.5	0.5	1	28.5	9	NA	0.162754	9.48007	Prochlorococcus marinus str. AS9601	95.14	850	ndhI	NADH dehydrogenase subunit I	Energy Metabolism	Environmental	CAAATGAAAAATTTCCTTCAACAAATAAATAGCTATATCAAAGAAGCTTTTAATGCTGGCAAATATTTATATAATGGCTTATCAGTTACTTTTGATCATCTTCGAAGGAGACCTGTCACTGTTCAATATCCCTATGAAAAATTAATACCTTCTGAAAGATATAGAGGAAGGATACATTATGAATTTGATAAATGTATTGCTTGTGAAGTTTGCGTGAGAGTATGTCCCATAAATTTACCAGTCGTTGATTGGGTAATGAATAAAGAAACAAAAAAAAAGGAACTAAGAAATTATTCTATAGATTTTGGAGTTTGTATATTTTGTGGAAATTGTGTTGAATATTGTCCAACTAATTGTCTTTCTATGACAGAAGAATATGAATTAGCTACTTTTGACAGA…	614
992210	HF_READ_04992210	0.67	0.33	0.33	0	0.5	0.67	0.5	0	0.33	1.5	1.67	0	0.5	1	2.33	2.83	1	1.5	1.17	0.83	0.83	0.17	0.83	1.83	1.33	0.17	1.83	1	0.83	1.17	27.65	0	NA	0.33566	7.29404	Prochlorococcus marinus str. AS9601	94.07	1051	ndhI	NADH dehydrogenase subunit I	Energy Metabolism	Environmental	GAGTGCAGCTTGCATGCCTGCAGGTCGACTCTAGAGGATCCCCTTATGAATTTGATAAATGTATTGCTTGTGAAGTTTGCGTGAGAGTATGCCCCATAAATCTACCAGTAGTTGATTGGGTAATGAATAAAGAAACAAAAAAAAAGGAACTAAGAAACTATTCTATAGATTTTGGAGTTTGTATATTTTGTGGCAATTGTGTTGAATATTGTCCAACCAATTGTCTTTCAATGACTGAAGAATATGAATTAGCTACTTTTGACAGACACAATCTAAATTTTGATAATGTTGCTCTTGGTAGGTTACCAACAAACGTCACAACAGATCCTTCAGTTAAACCTCTAAGAGAACTTACCTATCTTCCTAAAGGTGTCATGGATCCTCATGAAATCCCAGCTT…	768
846474	HF_READ_04846474	0	1	0	0.75	0	0	0	0	0	0	1.25	0	0.25	1.5	2.25	2.25	1.75	0.5	4.75	0	0.75	0.75	0.5	1.75	1	2	1.5	1.5	0	0.75	26.75	0	NA	0.466552	6.07988	Prochlorococcus marinus str. AS9601	90.53	799	ndhI	NADH dehydrogenase subunit I	Energy Metabolism	Environmental	TTTATGTCAATTGCAATAACAACACAAATTATTTGTTTTACAGTTTTATCTTTAGTTGTCATTATTGGAGCACTTGGTGTTGTGTTGCTCGAAAGTATTGTTTATTCAGCATTTCTGCTTGGTGGAGTTTTCATGAGTGTTGCAGGATTATATCTTCTATTAAATGCAAGTTTTGTTGCTGCTGCTCAAGTTTTAGTTTATGTGGGTGCAGTGAATGTATTAATAATTTTTGCAATAATGCTAGTCAATAAAAAAGAAGATTTAAAGCCTATTAATGACATTAAATCGAGAAGAGTTATATCAACATCGATATGTTTAACCCTTCTAAGCCTCTTAATAAGAGTTGACTTGACCAATGTATGGAGCTTATCAAGTCCTCAAAACTCTATTGGAGACGAA…	776
989740	HF_READ_04989740	0.33	0.5	0.67	0.33	0.33	0.67	0.5	0	0.67	0.5	1	0	0.33	1.33	1.5	2.17	0.67	1	2	0.5	1.17	0.17	0.17	1	0.33	0.67	1.67	1.33	0.17	0.17	21.85	0	NA	0.34973	7.16001	Prochlorococcus marinus str. AS9601	96.08	975	ndhI	NADH dehydrogenase subunit I	Energy Metabolism	Environmental	AAATGAAAAATTTCCTTCAACAAATAAATAGCTATATCAAAGAAGCATTTAATGCTGGCAAATACTTATATAATGGATTATCAGTTACTTTTGATCATCTTCGAAGAAGACCTGTTACTGTCCAATATCCATATGAAAAATTAATACCTTCCGAAAGATATAGAGGAAGGATACACTATGAATTCGATAAATGTATTGCTTGTGAGGTTTGCGTGAGAGTTTGCCCCATAAATCTACCAGTAGTTGATTGGGTAATGAATAAAGAAACTAAAAAAAAGGAACTTAGAAATTATTCTATAGACTTTGGAGTTTGTATATTTTGCGGAAATTGTGTTGAATATTGTCCAACTAATTGTCTATCAATGACCGAAGAATATGAATTAGCTACTTTTGACAGAC…	657
255483	JCVI_READ_1092257255483	0	0.25	0.25	0	0.5	0	0.75	0.25	0.25	0.75	1.25	0.5	0.25	1	1.25	2.25	0.25	2.5	2	0.75	0.5	0.25	0.75	1.75	0.75	0	0.5	1	0.5	0	21	0	NA	0.379589	6.90042	Prochlorococcus marinus str. AS9601	94.76	1298	ndhI	NADH dehydrogenase subunit I	Energy Metabolism	Environmental	AAATGAAAAATTTCCTTCAACAAATAAATAGCTATATCAAGGAAGCATTTAATGCTGGTAAATATTTATATAATGGCTTCTCAGTTACTTTTGATCATCTTCGAAGAAGACCTGTTACTGTCCAATATCCATATGAAAAATTAATACCTTCAGAAAGATATAGAGGAAGGATACATTATGAATTCGATAAATGTATTGCTTGTGAAGTTTGCGTGAGAGTTTGTCCCATAAATCTACCAGTAGTTGATTGGGTAATGAATAAAGAAACTAAAAAAAAGGAACTTAGAAATTACTCTATAGATTTTGGAGTCTGTATATTTTGTGGGAATTGCGTTGAATATTGTCCAACTAATTGTCTTTCAATGACCGAAGAATATGAATTAGCTACTTTTGACAGAC…	900
152745	HF_READ_05152745	0.2	0.6	0	0.8	0	0.6	0	0	0.2	0.2	0.6	0.6	0.2	1.6	1	0.2	0.4	0.8	0.8	0.2	0.6	0.8	0	1.6	0.8	0.4	1	1.4	0.6	1.4	17.6	0	NA	0.893545	2.31173	Prochlorococcus marinus str. MIT 9215	92.53	856	ndhI	NADH dehydrogenase subunit I	Energy Metabolism	Environmental	GAAATGCCAAGCTTGCATGCCTGCAGGTCGACTCTAGAGGATCCCCAATGAATAAAGAAACCAAAAAAAAGGAACTTAGAAATTATTCAATAGATTTCGGTGTTTGCATATTTTGCGGAAATTGTGTTGAATATTGCCCCACGAATTGTTTATCAATGACCGAAGAATATGAATTAGCTACTTTCGACAGACACAATCTGAATTTCGATAATGTAGCACTTGGTAGACTACCTACAAACGTCACAACAGACCCTTCAGTTAAACCTCTAAGAGAACTTGCCTATCTTCCTAAAGGAGTTATGGACCCTCATGAAATCCCATCCTCAAATACTAGAGTTGGTAAACTACCTGAAGAAGTCTATGATTGGATGAAGCCTGAATCAAATGAAAATAAAGATA…	693
60703	JCVI_READ_1092215060703	1	0.4	0	0	0	1.4	0	0	0.4	0	0.4	0.4	0	1.4	1.4	0.6	1.2	0.2	0.8	0.4	0.2	0.4	0.4	0.6	0.4	0.4	0.4	0.4	0	0.8	14	0	NA	0.612173	4.78585	Prochlorococcus marinus str. MIT 9301	93.86	1332	ndhI	NADH dehydrogenase subunit I	Energy Metabolism	Environmental	TCATGTCCATTGCAATAACAACTCAAATTATTTGTTTTACAATTTTATCTTTAGTGATCCTTATTGGAGCACTTGGTGTTGTATTGCTCGAAAGTATTGTTTATTCAGCCTTTCTACTAGGAGGAGTTTTCATGAGTGTTGCAGGATTATATCTTCTCTTAAATGCAAGTTTTGTTGCTGCCGCTCAAGTTTTAGTTTATGTGGGTGCCGTTAATGTATTAATAATTTTTGCGATAATGCTAGTCAATAAAAAAGAAGATTTAAAGCCCATCAATGATATTAAATCAAGAAGAATTATATCGACATCAATATGTTTAACCCTGCTTAGCCTTTTAATAAGAGTTGACTTGACTAATATATGGAGCCTATCAAATCCTCAAAACTCCATAGGGGAAGAAT…	900
537155	HF_READ_05537155	0	0.8	0	0	0.4	0.6	0	0	0.4	0	0.2	0	0.2	0	1.6	0.8	0.2	0.2	0.4	1	0.4	0.2	0.2	0.8	1	0	0.2	0.4	0	0	10	0	NA	NA	NA	Prochlorococcus marinus str. AS9601	93.01	716	ndhI	NADH dehydrogenase subunit I	Energy Metabolism	Environmental	TTATGTCCATTGCAATAACAACTCAAATTATTTGTTTTACAATTTTATCTTTAGTTATCCTTATTGGAGCACTCGGTGTTGTACTACTCGAAAGTATTGTTTATTCAGCCTTTCTTCTAGGCGGAGTTTTCATGAGTGTGGCAGGATTATATCTTCTATTAAATGCAAGTTTTGTTGCTGCAGCACAAATTTTAGTTTATGTGGGTGCAGTTAATGTATTAATAATTTTTGCAATTATGCTAGTCAATAAAAAAGAAGACTTAAAGCCCATCAATGACATTAAATCGAGAAGAATCATATCAACATCAATATGCTTAACCCTTCTAAGCCTTTTAATAAGAGTTGACCTGACTAAAGTATGGAGTCTATCAAGTCCTAAAAACTCTGTTGGAGAAGAAT…	545
810795	JCVI_READ_1092963810795	0	0.4	0.2	0.2	0.2	0	0.2	0	0	0.4	0.6	0	0.8	1	0.6	0.8	0	0	0.4	0	0.4	0.8	0	0.2	0	0.2	0.8	0	0.2	0.8	9.2	0	NA	0.381161	6.86566	Prochlorococcus marinus str. MIT 9301	92.32	626	ndhI	NADH dehydrogenase subunit I	Energy Metabolism	Environmental	CCTATTTTTTTGGCCCCAAGTTTTAGTCTCTTTGAGCGGATATGCATCTAATAATAAATATTCATTATTAGGAGGATTAAGAGCAGCAGCTCAATCAATAAGTTACGAAATACCTTTAGCGTTATCTGTACTTGCTATCGTACTAATGACAAATTCTCTAAGCACTATTGATATTGTTAACCAACAAAGTGGTGCTGGAATACTAAGTTGGAATATTTGGAGACAACCAGTCGGTTTTATTGTTTTTTGGATTTGTGCTCTTGCAGAATGTGAAAGACTTCCATTTGATTTACCTGAAGCTGAAGAAGAATTAGTTGCGGGATATCAAACTGAATATGCAGGGATGAAATTCGCATTGTTCTACCTTGGCAGTTACATAAATTTAATTCTTTCAGCATT…	488
551889	JCVI_READ_1108839551889	0	0.33	0	0	0	0.33	0.33	0	0.33	0	0.33	0	0	1	1	1	0	0	0.67	0	0.67	0.33	0	0.67	0	0	0	0.33	0.33	0	7.65	0	NA	NA	NA	Prochlorococcus marinus str. MIT 9215	92.3	1116	ndhI	NADH dehydrogenase subunit I	Energy Metabolism	Environmental	TACGACAATATCAGTTCATCCAAGAAGCATTTAATGCTGGCAAATATCTATATAATAGGGCTTATCTGTAACTTTTGATCATCTTCGAAGAAGACCTGTCACTAGTCCAATATCCATATGAAAAATTAATACCTTCTGAAAGATATAGAGGAAGAATACATTATGAATTCGATAAATGTATTGCTTGTGAAGTTTGTGTAAGAGTTTGTCCTATAAATCTACCAGTAGTTGACTGGGTTATGAATAAGGAAACAAAAAAAAAGGAACTTAGAAATTATTCAATAGATTTCGGAGTTTGTATATTTTGCGGAAATTGTGTTGAATATTGCCCAACTAATTGTCTGTCTATGACAGAAGAATATGAATTAGCTACCTTCGACAGACACAATCTAAATTTTG…	882
687711	JCVI_READ_1103769687711	0	0	0	0	0	0.6	0.2	0	0.6	0.2	0	0.6	0	0	0.2	0.2	0.2	0.6	0.2	0.2	0	0	0.2	0	0	0.2	0.2	0.4	0.2	0	5	0	NA	NA	NA	Prochlorococcus marinus str. MIT 9215	90.22	848	ndhI	NADH dehydrogenase subunit I	Energy Metabolism	Environmental	TTATGTCCATTGCAATAACAACACAATTTATTTGTTTTACTGTTCTATCTTTAGTTGTCCTTATAGGAGCACTCGGTGTTGTATTGCTCGAAAGTATTGTTTATTCAGCGTTTCTTCTTGGTGGAGTTTTCATGAGCGTAGCGGGATTATATCTTCTTTTAAATGCAAGTTTTGTGGCGGCAGCACAGGTATTAGTTTATGTGGGTGCAGTTAATGTATTAATAATTTTTGCAATAATGTTAGTCAACAAAAAAGAAAATTTAAAACCTATTAATGACATAAAATCGAGAAGAATAATATCAACATTGATATGTTTAACCTTACTCAGCCTCTTAATAAGAGTTGACTTGACCAACGTATGGAGACTATCAAGCCCTAAAAACTCTATAGGAGAAGAAT…	726
974888	HF_READ_04974888	2.2	0.8	0.8	1	0.2	1.6	2	0.8	1.6	2	2.8	0.4	0.6	1.8	4.2	3	4.8	4	7.8	1.8	1.6	1.2	1.8	1.8	2.6	1	4.4	2.8	1	2.4	64.8	1	Yes	0.0055102	15.1508	Prochlorococcus marinus str. MIT 9312	94.37	555	ndhI	NADH dehydrogenase subunit I	Energy Metabolism	Environmental	AAATGAAAAATTTTCTTCAACAAATAAATAGCTATATAAAAGAAGCATTTAATGCTGGCAAATATTTATATAATGGCTTATCAGTAACTTTTGATCATCTTCGAAGAAGACCAGTTACTGTCCAATATCCATATGAAAAATTAATACCTTCTGAAAGATATAGAGGAAGGATACATTATGAATTCGATAAATGTATTGCTTGTGAAGTTTGTGTGAGAGTATGTCCCATAAATCTTCCAGTAGTTGATTGGGTAATGAATAAAGAAACCAAAAAAAAAGAACTTAGAAATTATTCAATAGATTTTGGAGTTTGTATATTTTGTGGTAATTGTGTTGAATATTGCCCAACTAATTGTCTATCAATGACCGAAGAATATGAATTATCTACTTTCGAGGGGA…	438
388345	JCVI_READ_1103769388345	1.25	0.25	0	0.25	0	1.25	0.75	0.5	0.25	0.75	0.5	0.25	0.5	0.5	1.75	0.5	1.75	1.75	4	0.5	0.5	0	1.25	0	1.25	0.5	2.75	1.25	0.25	0.25	25.25	1	Yes	0.0171098	13.6031	Prochlorococcus marinus str. MIT 9215	92.39	1142	ndhI	NADH dehydrogenase subunit I	Energy Metabolism	Environmental	GTACATGACATAATAGCTATATCAAAGAAGCATTTAATGCTGGCAAATATTTATACAATGGTATATCTGTAACTTTTGATCATCTTCGAAGAAGACCTGTTACTGTCCAATATCCATATGAAAAACTGATACCATCTGAAAGATATAGAGGGAGGATACATTATGAATTCGACAAATGTATAGCTTGCGAAGTTTGTGTGAGAGTATGTCCAATAAATCTTCCAGTAGTTGATTGGGTAATGAATAAAGAAACCAAAAAAAAAGAACTAAGAAATTATTCAATAGATTTTGGAGTTTGTATATTTTGCGGAAATTGTGTTGAATATTGCCCTACTAATTGTCTATCAATGACCGAAGAATATGAATTAGCTACTTTCGATAGGCACAATCTAAATTTTG…	885
425209	JCVI_ORF_1105157425209	0	0	0	0	0	0	0.83	0	0	0	1.67	0	0	0	0	0.5	1.5	0	0	0	0	0	0.17	0.17	0	0.67	0	0	0	0.83	6.34	0	NA	NA	NA	Prochlorococcus marinus str. NATL1A	79.11	73.8	nirA	Ferredoxin-nitrite reductase	Energy Metabolism	Environmental	TTAATATGCAATATTATTTAAATGATAAAAAATTAAATAAGATTGAAAAGCAAAAGGCGGAGAAAGATGGTCTGAAAATTTTTGAAGAATTAGATGATTATGCTCTTAAAGGGTGGGAAGAGATGGATGAAGTAGATTTACAAATGCGCTTAAAGTGGTATGGCCTTTTTTGGAGACCAAAAACTCCTGGAAGATTTATGATGAGGCTTAGAGTTCCCAATGGAATTTTAAACTCTAATCAGTTGAGGGTAATCGCTTCAATAGTTGCTAGATACGGAGAAGACGGTTCTGCAGATATAACAACTAGGCAAAATATTCAATTAAGGGGGGTTTTGATAAATGATCTACCAGATATTATTAAAAGACTAAGAGAGGTTGATATTACATCCGTTCAATCTG…	935
77487	JCVI_READ_1092963077487	1.33	0.67	0	0.67	0	2.33	0.67	0	0.33	0.33	0.67	0	1	0.33	3.67	1.67	0	0.33	3.67	1.33	1.33	1.33	1.67	2.67	2	0	1	1	0	1.33	31.33	0	NA	0.319936	7.45487	Prochlorococcus marinus str. MIT 9312	93.32	654	sodN	putative nickel-containing superoxide dismutase precursor	Unclassified	Environmental	AAATGTTAACTAAATTCATGAATTCTTTTCTAAATAAAAATTCTCCAATGACAGTTCGTGCTCACTGCGATGGTCCTTGTGGTGTTTATGATCCAGCATCTACGAGAGTTGCTGCTGAAGCAGTTTTATCAATGACAAAAAAACTCATAGCACTAGAAGCTCCTTCTAGCACCGATTCAGCAGAGTGGGCTTCATACAGTAACACATTTTCTAGATATGTTGCAGTAAAAGAAGAGCAAGCAAAAGAAACAAAGAAAGAAATTCTAATTCTGTGGACAGATTACTTTAAACCAGTTCACTTAGAAACTTATCCAGACTTACATGAAACCATTTGGAAAGCGACCAAATTATGCAGTGCATGCAAAGTTAACATTGATTTAAGTCAAGCTGAAGAACTCA…	492
893929	HF_READ_04893929	0.5	0	0.25	0	0	0.5	2	0	0	0	0	0	0	0.25	2	0.75	0.5	0.5	0	0	0.25	0.25	0	0	0	0	0.25	0	0	0	8	0	NA	NA	NA	Prochlorococcus marinus str. MIT 9312	90.38	549	sodN	putative nickel-containing superoxide dismutase precursor	Unclassified	Environmental	AAATGCTAAGTAAATTCCTCAATTCTTTTTTAAATAAAAAATCCCCAATGAAAGTTCATGCTCATTGTGACGGACCTTGTGGTGTATATGATCCAGCATCTACGAGAGTTGCTGCTGAAGCAGTTTTATCAATGACTAAAAAACTTATTGCTCTAGATCCTCCCTCTAGTACTGACTCAGAAGGGTGGGCCGCTTACAGTAATACATTTTCTAGATATGTTGCAGTTAAAGAAGAGCAAGCGAAAGAAACAAAAAAAGAAATTCTAATTTTATGGACGGATTACTTTAAACCAGTACACTTGGAAACCTATCCTGATTTACATGAAACCATTTGGAAGGCAGCTAAATTATGCAGTGCCTGTAAGGTTAATATTGATATAGCTCAAGCTGAAGAACTAA…	492
965235	CAM_READ_0084965235	9.5	8	9	6.75	6	18	8.5	2.25	4	10.5	9.75	6.5	11.5	30.25	40	34.25	18.75	17.75	40	29.25	28.25	15.5	33.25	34	14.25	5.5	14.75	9.5	6.75	34.5	516.75	4	Yes	0.13946	9.86065	Prochlorococcus marinus str. AS9601	97.93	486	sodN	putative nickel-containing superoxide dismutase precursor	Unclassified	Environmental	GTCCATGCTCACTGCGATGGTCCTTGTGGTGTTTACGACCCAGCATCTACGAGAGTTGCAGCTGAAGCAGTTTTATCAATGACAAAAAAACTTATTGCATTAGAAGCTCCTTCTAGCACTGATTCAGCAGAGTGGGCTGCATACAGTAATACATTTTCTAGATATGTTGCAGTTAAAGAAGAGCAAGCAAAAGAAACAAAGAAAGAGATTCTAATTTTATGGACAGACTACTTTAAACCAGTTCACTTAGAAACTTATCCAGACTTACATGAAACCATTTGGAAGGCGGCATCCGCTTTCGGCACCGTATGAGAAATCAAAGTCTTTGGGTTCTGGGGG	339
75170	JCVI_READ_1103359075170	5.67	7.33	8.5	7.17	4.5	16.83	3.67	1.17	2.5	7	10	5.33	12.17	17.5	39.17	30.17	9.5	10.5	32.17	10.83	20.5	9.17	22	31	11.33	1.67	12.83	8	3.83	22.5	384.51	4	Yes	0.0504878	11.9866	Prochlorococcus marinus str. AS9601	97.96	848	sodN	putative nickel-containing superoxide dismutase precursor	Unclassified	Environmental	AAATGTTAAGTAAATTCATCAATTCTTTTCTAGATAAAAAATCCCCAATGACAGTCCATGCTCACTGCGATGGTCCTTGTGGTGTTTACGACCCAGCATCTACAAGAGTTGCAGCTGAAGCAGTTTTATCAATGACAAAAAAACTTATTGCATTAGAAGCTCCTTCTAGTACTGATTCAGCAGAGTGGGCTGCATACAGTAATACATTTTCTAGATATGTTGCAGTTAAAGAAGAGCAAGCAAAAGAAACAAAGAAAGAGATTCTAATTTTGTGGACGGATTACTTTAAACCAGTTCACTTAGAAACTTATCCAGACTTACATGAAACCATTTGGAAGGCAGCCAAATTATGCAGTGCATGCAAAGTTAATATTGACTTAGCCCAAGCTGAAGAACTCA…	492
917732	HF_READ_04917732	2	0.5	0.5	0	0.5	1	0	1	0.5	1	0.5	1	1	0.5	1.5	3	0.5	1	1	2.5	1.5	1	1	1.5	2	0	3	1	1.5	2.5	34.5	0	NA	0.522881	5.59493	Prochlorococcus marinus str. MIT 9301	96.37	981	ntcA	global nitrogen regulator NtcA	Transcription	Environmental	TTATGATACCCGCTTCACGAGGATTCAACCGCTTTAGTTCGCAACAGTCAGGACAAAGTAAAATCAATTCTGTTGGAGAACGTTTTCCAATTAATAGAACTTTAATGGAAGTGATTAAAGGTCTAGATGGAGCAAGCACAGAAATGGTTGAGAGATCTAAAACAATATTTTTTCCAGGGGATCCTGCTGAAAGAGTTTATCTTATAAGAAGAGGTGCAGTAAGACTGTCAAGAGTTTATGAGTCAGGTGAAGAAATAACTGTTGCTCTTTTAAGAGAGAATAGTCTCTTTGGTGTTTTATCTCTTCTAACAGGCCATAGATCTGATCGTTTTTACCACGCCATAGCATTTACAAGAGTTGAAATGATAACAGCACCTGCAAATTCTGTTTTAAGAGCTA…	634
126532	JCVI_READ_2126532	2	0.33	0.67	0	0.33	0	0	0.33	0.33	1	0	0.33	0.67	0.67	0.67	1.67	0.67	0.67	1.33	1.67	1.33	0.33	1	1.33	0.33	0	1	0.33	0.67	2	21.66	0	NA	0.447795	6.24162	Prochlorococcus marinus str. MIT 9301	91.57	529	ntcA	global nitrogen regulator NtcA	Transcription	Environmental	CTATGATACCTGCATCACGAGGATTCAACCGCTTTAGTTCGCAACATTCCGGACAAAGTAAAATTAACTCTGTTGGAGAACGTTTTCCAATCAATAGAACTTTAATGGAAGTTATTAAGAGTCTTGAGGGCGCGAGCACAGAAATGGTTGAGAGATCTAAAACAATATTCTTTCCTGGTGACCCTGCTGAAAGAGTTTATCTTATAAGAAGAGGAGCAGTGAGACTGTCAAGAGTTTATGAGTCAGGTGAAGAAATAACCGTTTCTCTGTTAAGAGAGAATAGTCTCTTTGGTGTTTTATCTCTTTTAACAGGCCATAGATCCGATCGTTTTTACCATGCCATAGCATTCACAAGAGTTGAAATGATAAACAGCACCCGCAAATTCTGTTTTAAAAGTA…	499
720	HF_READ_05000720	0.33	0.17	0.17	0.5	0.33	0.5	0.17	0.5	0.5	0.67	0.5	0.33	0	1.33	0.83	0.67	0.67	0.83	1.33	1	1	0.5	0.33	0.83	1.17	0	1.67	0.5	0.67	0.67	18.67	0	NA	0.403857	6.62921	Prochlorococcus marinus str. MIT 9215	94.3	848	ntcA	global nitrogen regulator NtcA	Transcription	Environmental	GCAGTGCCAGCTTGCATGCCTGCAGGTCGACTCTAGAGGATCCCCTTTTACAGGGGCTTTCAAGTAGGATCCTTCAAACTGAAACAATGATAGAAACTCTTACACATAGAGATATGTCTTCTCGTTTAGTAAGTTTTTTAATGGTTCTGTGTAGAGACTTTGGAGTTGCAGGTGAAAAAGGTATTACGATAGATCTAAGGCTTTCACATCAGGCAATTGCTGAAGCTATTGGTTCTACAAGAGTAACCATTACAAGATTATTGGGAGATTTAAAGGATTCAGGGCTTCTTAATATTGAGAGAAAAAAGATTACAGTGTTTGATCCAATTGCTCTTGCAAAAAGATTTAATTGATTCATCATAAATTATGATGTACTGAGTATATGCAAAAGTGTGGCTT…	658
823493	HF_READ_04823493	0.67	0	0	0.33	0.33	0	0	0	0	0.33	0.33	0.33	0	1.33	1	0.33	0.33	1.67	0.67	1	0.33	0	0.33	1.33	1	0.33	1	0.67	0.67	2	16.31	0	NA	0.764397	3.49293	Prochlorococcus marinus str. AS9601	94.58	1078	ntcA	global nitrogen regulator NtcA	Transcription	Environmental	CTTAGAAACCTGCTTCACGAGGATTCACAGCTTAAGTTGGCACATGCCGGGACAAAGGTAAAATGACTCTTGTTTGAGAACGTGTTTCCCATTCAATAGGAACTTTTAATGGCAAGTTATTTAAGGGCCTTGAATGGTGCAAAGTACAGGAAATGGTTGAAGAGGTTTTAAAACGATGGTCGTGCCCTGGAGATCCTGCTGAAAGGTTTAATCTTATAAGAAGAGGAGCAGTAAGACTTTCAAGAGTTTATGAGTCAGGTGAAGAAATTACTGTTGCTCTTTNAAGAGAGAATAGTCTCTTTGGTGTATTATCTCTTCTAACAGGTCATAGATCAGATCGTTTTTACCATGCCATAGCATTCACAAGAGTTGAAATGATAACAGCACCTGCCAATTCTG…	940
789966	HF_READ_04789966	0.2	0.4	0	0	0.2	0.2	0	0.8	0.6	0.4	0.2	1	0	0.2	0.6	1.2	0.4	0	0.4	0.8	0.4	0.2	0	0.6	1	0.2	0.8	0.4	0.2	0.8	12.2	0	NA	0.394899	6.73036	Prochlorococcus marinus str. MIT 9301	97.03	1423	ntcA	global nitrogen regulator NtcA	Transcription	Environmental	TTATGATACCTGCTTCACGAGGATTCAACCGCTTTAGTTCGCAACAGTCAGGACAAAGTAAAATCAATTCTGTTGGAGAACGTTTTCCAATTAATAGAACTTTAATGGAAGTGATTAAAGGTCTAGATGGAGCAAGCACAGAAATGGTTGAGAGATCTAAAACAATATTTTTCCCCGGTGACCCTGCTGAAAGAGTTTATCTTATAAGAAGAGGTGCAGTAAGGCTCTCAAGAGTTTATGAATCAGGTGAAGAAATAACTGTTGCTCTTTTAAGAGAGAATAGTCTCTTTGGTGTTTTATCTCTTCTAACAGGCCATAGATCTGATCGTTTTTACCATGCGATAGCATTCACAAGAGTTGAAATGATAACAGCACCTGCAAATTCTGTTTTAAAAGCTA…	903
370612	JCVI_READ_1092344370612	0	0	0	0.33	0	0	0.33	0	0.33	0	0	0.33	0.33	0.67	0	0	0.33	0.67	1.67	0.33	0.33	0	0.33	0	0.67	0	0.67	0.67	0.33	0.33	8.65	0	NA	NA	NA	Prochlorococcus marinus str. MIT 9301	92.99	1281	ntcA	global nitrogen regulator NtcA	Transcription	Environmental	TTTAATGGAAGTTTTAAAGGTCTTGATGTGCAAGCACAGAAATGGTTGAGCGATCTAAAACAATATTTTTTCCTGGGGACCTGCTGAAAGGGTTTATCTTATAAGAAGAGGGGCAGTAAGACTATCAAGGGTGTATGAGTCAGGTGAAGAAATAACTGTTGCTTTATTAAGAGAGAATAGTCTCTTTGGTGTTTTATCTCTTCTAACAGGACATAGGTCTGATCGTTTTTATCATGCCATAGCATTCACAAGAGTTGAAATGATAACAGCACCTGCAAATTCTGTTTTAAGGGCTATTGAAGAAGATGCATCAGTCGGACTATTACTTTTGCAGGGGCTTTCAAGCAGGATCCTGCAAACTGAAACAATGATAGAAACTCTTACACATAGAGATATGTC…	940
19356	HF_READ_05019356	0	0.25	0	0.25	0.5	0	0.25	0	0	0	0	0	0	0.5	0.75	0	0.25	0.25	0.5	0.25	0.25	0	0.25	0.5	0.25	0.25	1.25	0	0.25	1	7.75	0	NA	NA	NA	Prochlorococcus marinus str. AS9601	94.11	1072	ntcA	global nitrogen regulator NtcA	Transcription	Environmental	AGATATTATGATACTGCTCACGAGATCACAGCTTTAGTTCGCAACAATCCGGACAAAGTAAAATTAACTCTATTGGAGAACGTTTTCCAATCAATAGAACTTAATGGAAGTGATTAAAGGTCTAGATGGTGCAAGCACAGAAATGGTTGAGAGGTCTAAAACAATATTCTTCCCTGGAGACCCTGCAGAAAGGGTGTATCTTATAAGAAGGGGAGCAGTAAGACTTTCAAGAGTTTATGAGTCAGGTGAAGAAATAACTGTTGCTCTTTTAAGGGAGAATAGTCTCTTTGGTGTTTTATCCCTTCTAACAGGCCATAGATCCGATCGTTTTTACCATGCTATAGCATTCACAAGAGTTGAGATGATAACAGCACCTGCAAATTCTGTTTTAAGAGCTAT…	791
769070	HF_READ_04769070	0	0.4	0	0.4	0.2	0.2	0	0.4	0.2	0.2	0.2	0.4	0	0	0.6	0.8	0	0.2	0.2	0.4	0	0	0.2	0	0.6	0.2	1	0.2	0	0.2	7.2	0	NA	NA	NA	Prochlorococcus marinus str. MIT 9301	97.04	884	ntcA	global nitrogen regulator NtcA	Transcription	Environmental	TTATGATACCTGCTTCACGAGGATTCAACCGCTTTAGTTCGCAACAGTCAGGACAAAGTAAAATCAATTCTATTGGAGAACGTTTTCCAATTAATAGAACTTTAATGGAAGTGATTAAAGGTCTAGATGGAGCAAGCACAGAAATGGTTGAGAGATCTAAAACAATATTTTTCCCCGGGGACCCTGCTGAAAGAGTTTATCTTATAAGAAGAGGTGCAGTAAGACTGTCAAGAGTTTATGAGTCAGGTGAAGAGATAACTGTTGCTCTTTTAAGAGAGAATAGTCTCTTTGGGGTTTTATCTCTTCTAACAGGACATAGATCTGATCGTTTTTACCATGCCATAGCATTCACAAGAGTTGAAATGATAACAGCACCTGCAAATTCTGTTTTAAGAGCTA…	553
194424	HF_READ_05194424	0	0	0	0.17	0.17	0	0.17	0	0	0.17	0	0.17	0	0.33	0.33	0	0	0.33	0.5	0.33	0.33	0	0.17	0.33	0.33	0.17	0.5	0.33	0.17	0.17	5.17	0	NA	NA	NA	Prochlorococcus marinus str. AS9601	94.89	1053	ntcA	global nitrogen regulator NtcA	Transcription	Environmental	TTTTTTATTTCAGGCGTGCAGCTTGCATGCTGCAGGTCGACTCTAGAGGATCCCCGGAGACCCTGCTGAAAGGGTTTATCTTATAAGAAGAGGAGCAGTAAGACTTTCGAGAGTTTATGAGTCAGGTGAAGAAATAACTGTTGCTCTTTTAAGAGAAAATAGTCTATTTGGTGTTTTATCTCTTTTAACAGGCCATAGATCCGATCGTTTTTATCATGCTATAGCATTTACAAGAGTTGAAATGATAACAGCACCTGCCAATTCTGTTTTAAGAGCTATAGAGGAAGATGCATCAGTGGGACTATTACTTTTACAGGGGCTTTCAAGTAGGATCCTCCAAACTGAAACAATGATAGAAACTCTTACTCATAGAGATATGTCTTCTCGTTTAGTAAGTTT…	819
577411	JCVI_ORF_1112700577411	1	2	1	2	1	0.5	1.5	0.5	1.5	0	1.5	0.5	0.5	1.5	1.5	2.5	3	2	2	1	2.5	1	4	2	1	0.5	2	2	1	3	46	0	NA	0.947861	1.60416	Prochlorococcus marinus str. MIT 9312	90.38	900	glnA	glutamine synthetase, type I	Amino Acid Metabolism	Environmental	TTATGTCTAAGTCTCCACAAGATGTTTTAAGTCAAATTAAAGACGAAGGAATTGAACTAATCGATTTAAAATTCACAGACATTCATGGAAAATGGCAACATTTAACTCTTACGTCAGACATGATAGAGGAGGAATCATTTACCGAGGGTCTAGCATTTGATGGTTCATCAATAAGGGGTTGGAAAGCAATTAATGCCTCTGATATGTCAATGGTTCCTGATTCAACCACAGCCTGGATTGATCCTTTTTATAAACATAAAACTCTTAGTATGATTTGCTCTATTCAAGAGCCAAGAAGTGGTGAGCCTTATGATAGATGTCCAAGATCATTAGCTCAAAAAGCGTTAAAATACCTAGATTCTACTGGTATAGCTGATACAGCATTCTTTGGACCAGAAC…	738
45685	HF_READ_05045685	0	0.25	0.25	0	0	0	0	0	0	0	0.5	0.25	0	0.25	0.5	1.25	0.25	0.75	0.25	0.75	0.25	0	0.5	1.25	0.75	0	0	0	0	0	8	0	NA	NA	NA	Prochlorococcus marinus MED4	96.72	938	nudix	NUDIX hydrolase	Unclassified	Environmental	TTATGGGCAATAAAAACCTTATAATAAGATCCATTTTTAAAGAAAAAATATCTGAGTTAAAGTCTAAAAAATTTAGTTTCGAAATAAATAGAATTGAGCTTCCCAAATGGACATGAAGGTGAATATGGATATATTAAGCATCCTGGGGCAGCATTAGCCGTACCTATTACAAAAGACAATAAAGTTATCATTCTTCGGCAATATAGATTTGCTGTTTCAAGGTATTTATTAGAATTTCCAGCAGGTACATTAGAAATAGGTGAAACACCTATCAATTCAATTCAAAGAGAAATACAAGAAGAGACTGGATTTAGTGCAAACAAATGGGATGAACTAGGAACTCTTGTCCCTGCTCCTGGCTATGCAGATGAAGAAATTTATTTATTTTTAGCTCGTGAT…	588
609926	HF_READ_05609926	0.17	0	0	0	0	0	0	0	0.33	0	0.33	0	0	0.33	0.5	1	0	0.67	0.33	0.33	0.33	0	0.5	0.5	0.83	0.17	0	0	0.17	0	6.49	0	NA	NA	NA	Prochlorococcus marinus MED4	96.96	704	nudix	NUDIX hydrolase	Unclassified	Environmental	TCATGGGCAACATAAACTTTGTAAAAAGATCCATTTTTAAAGAAAAAATATCTGAGTTGAAGTCAAAAAAATTTAGTTTCGAAATAAATAGAATTGAGCTTCCAAATGGACACGAAGGTGAATATGGATACATTAAGCATCCTGGGGCAGCATTAGCCGTACCTATTACAAAAGATAATAAAGTTATCATTCTTCGGCAATATAGATTTGCTGTTTCAAGGTATTTATTAGAATTTCCAGCAGGCACATTAGAAATAGGTGAAACACCTATTGATTCAATTCAAAGAGAAATAAAAGAAGAGACAGGATTCAGTGCAAACAAATGGGATGAACTAGGAACTCTTGTCCCTGCTCCTGGGTATGCAGATGAAGAAATTTATTTATTTTTAGCTCGTGATT…	474
887686	HF_READ_04887686	0	0	0	0	0	0	0.25	0	0	0	0.5	0	0	0.25	0.5	0.5	0	0.75	0.25	0	0.25	0.25	0.5	0.5	0.75	0	0	0	0	0.25	5.5	0	NA	NA	NA	Prochlorococcus marinus MED4	96.43	714	nudix	NUDIX hydrolase	Unclassified	Environmental	TTATGGGCAACAAAATCCTTATAAAAAGATCCATTTTTAAAGAAAAAATATCGGAGTTAAAGTCAAAAAAATTTAGTTTCGAAATAAATAGAATTGAGCTTCCAAATGGACATGAAGGTGAATACGGATACATTAAGCATCCTGGGGCAGCGTTAGCCGTACCTATTACAAAAGACAATAAAGTTATCATTCTGCGGCAATATAGATTTGCTGTTTCAAGGTATTTATTAGAATTTCCAGCAGGTACATTAGAAATAGGTGAAACTCCAATTAATTCAATTCAAAGAGAAATTCAAGAAGAGACTGGATTCAGTGCAAACAAATGGGATGAACTTGGAACTCTTGTCCCTGCTCCTGGTTATGCAGATGAAGAAATTTATTTATTTTTAGCTCGTGATT…	541
970534	HF_READ_04970534	10.6	8	8.6	4.8	6.6	17.8	5.8	2.6	7.8	8.2	7.6	4.2	7	22.2	19.2	12.2	13.8	6.2	10.4	6	10.6	8.2	12.6	10	15.2	7.2	14.4	11.4	4.6	11.2	295	4	NA	0.233977	8.44284	Uncultured Prochlorococcus marinus clone HF10-88H9	96.41	567	petF	Ferredoxin	Energy Metabolism	Environmental	AAATGGCTTCTTACAAAGTTACACTCATCAACGAAGGTGAAGGTCTCAATTCAACTATTGAAGTACCTGATGACCAGTACATCCTAGATGCGGCTGAAGAACAAGGTATCGACCTTCCTTATTCCTGCAGAGCTGGAGCATGTTCAACATGCGCTGGAAAAGTTACTTCAGGTAGTGTTGATCAATCAGATCAAAGTTTCTTGGATGATGACCAACTAGAAGCTGGTTTTGTACTTACATGTGTTGCTTATCCAACATCTGACGTAACAATTACAACTCATGCTGAGGAAGAATTGTATTAATTATAAAAATTTAACTTTTCTAAGTTGATTATGGGGATCCTCTAGAGTCGACCTGCAGGCATGCAAGCTGCACTGGCA	380
701129	CAM_READ_0084701129	6.5	5.17	5.83	3.83	4.5	13.5	2.33	0.5	4.67	6.5	5.33	4	6.17	18	14	9.33	6.67	5.17	16	5	9.17	12.83	13.5	10	12.67	5.17	12.33	8.33	6.67	10	243.67	0	NA	0.282266	7.84547	Prochlorococcus marinus str. MIT 9301	97.19	494	petF	Ferredoxin	Energy Metabolism	Environmental	TAACTTAACTAAAATTTAACCTAAACTTAATTTAGTAAAGTTAACCTAGAATGACCAATACATCCTCGATGCGGCTGAAGAACAAGGTATCGACCTTCCTTATTCCTGCAGAGCTGGAGCATGTTCAACATGTGCTGGAAAAGTTACTTCAGGTAGTGTTGATCAGTCTGATCAAAGTTTCTTGGATGACGACCAACTAGAAGCTGGTTTTGTTCTTACTTGTGTTGCTTATCCAACATCAGACGTAACAATTACAACTCATGCTGAGGAAGAATTGTACTAATTATAAAAAATTTAACTTTTCTGAGTTGATTATTGATTGTTTCTCTGCCACCTCTTAGAAGGTGGCTTTTTTT	356
148628	JCVI_READ_1104230148628	1	0.5	0	0.5	1.5	2.5	0	0	0	1.5	1.5	1.5	0.5	4	4	3	1.5	1	1	1.5	2	2	5.5	3	1	0.5	1	1	0	1.5	44.5	5	NA	0.0731387	11.3139	Prochlorococcus marinus str. MIT 9301	90.45	1146	psbB	photosystem II PsbB protein (CP47)	Energy Metabolism	Environmental	CCTAGCATGGTTTATTGGAGGATTTTTCACATAACCAACAGACCTGGAGAAAGATTATATAGAGCATTAAAACTTGGAAGCCTTGAAGGTGTTCTTGCTAGTGCTCTAGCTGCAGTACTGTTTGTATCTTTTGTTGTTGCCGGAACAATGTGGTACGGATCAGCCACAACCCCGGTCGAGTTATTTGGTCCTACCAGATATCAATGGGACTCTGGCTATTTCAAAACTGAAATTAATAGAAGAGTTCAAGCTGCTATTGATGATGGTGCGACTAAAGAAGAGGCATATGCATCGATTCCAGAAAAGCTAGCCTTCTACGATTACGTTGGTAATAGTCCTGCAAAAGGTGGTTTATTTAGAGTTGGAGCTCTTGTTAATGGTGATGGTTTACCAACTGGT…	952
770109	HF_READ_04770109	3	2.67	3.67	1.33	2.33	9.33	1.67	1	3.33	3.33	3.33	2.33	4	9.67	8	5	5.67	3	7.33	3.33	6	2.33	6.33	2.67	6.33	2	3.67	4	1	3.67	121.32	0	NA	0.270728	7.9756	Prochlorococcus marinus str. AS9601	95.07	452	petF	Ferredoxin	Energy Metabolism	Environmental	TGGCTTCCTTACAAAAGTTACCACTCATCAACGAAGGTGAAGGTCTCAATTCAACTATCGAAGTACCTGATGACCAGTACATCCTTGATGCTGCTGAAGAACAAGGTATAGACCTTCCTTATTCCTGCAGAGCTGGAGCATGTTCAACATGCGCTGGAAAAGTATCTTCAGGTAGTGTTGATCAATCAGATCAAAGTTTCTTGGATGATGACCAACTAGAAGCTGGTTTTGTACTTACATGTGTTGCTTATCCAACATCTGACGTAACAATTACAACTCATGCTGAGGAAGAATTGTATTAATTAGGGGATCCTCTAGAGTCGACCTGCAGGCATGCAAGCTTGCACTGCT	351
908390	JCVI_READ_1093018908390	0.67	0.17	1	1.5	0	2.67	0	0	0	0	0.67	0.17	1	1	0.5	1.33	0.17	1.17	1.17	3	1	0.17	1.33	3.67	1	0.5	0	1.33	0	3.17	28.36	7	NA	0.212282	8.75646	Prochlorococcus marinus str. AS9601	96.12	690	petF	Ferredoxin	Energy Metabolism	Environmental	ATTTGAAAAAGACTTTCACAGTCACGATTAAAAATAAAGAAACCGGAAAGGTCTACCAAGAGCAGGTTAATAGTGACGATTATATACTTAAGGAATTTGAAAAGAAAGGTTTCAAACTTTCATTTTCATGTAGAAACGGTTGTTGTACAAGTTGTGCAGTTAAAATTAAATCTGGCACCTTACAACAACCTGAAGCCATGGGTGTTTCTCAGGCGTTAAAAGACAAAGGTTATGCACTTCTTTGTGTCGCTAAAGCAACTTCAGATCTTGAGGTAGAAACTACATATGAAGATGAAGTTTACGATTTACAATTTGGACAATATTTTGGGAGGGGAAATACAAGAGTTGCCCCACCTTGGGAATTTGAGGAAGATTAACTATCATGTTTGAATTAAGTGA…	414
107854	JCVI_READ_107854	0.67	0.17	0.33	0.67	0	1	0	0.33	0.17	0.33	0.33	0.33	0.33	0.5	0.17	0.67	0.33	0.83	1.83	2.5	0.83	0.5	1	1.67	0.5	1.5	0	0.67	0	2.33	20.49	0	NA	0.916317	2.0511	Prochlorococcus marinus str. AS9601	96.17	626	petF	Ferredoxin	Energy Metabolism	Environmental	ATTTGAAAAAGACTTTCACAGTCACGATTAAAAATAAAGAAACCGGAAAGGTCTACCAAGAGCAGGTTAATAGTGATGACTACATACTTAGGGAATTCGAAAAGAAAGGTTTCAAACTTGCATTTTCATGTAGAAATGGTTGCTGTACAAGTTGTGCAGTTAAAATTAAATCTGGTACTTTGCATCAACCTGAAGCCATGGGTGTATCTCAGGCATTAAAAGACAAAGGTTATGCACTTCTTTGTGTTGCTAAAGCAACTTCAGATCTTGAGGTAGAAACTACATATGAAGATGAAGTTTACGATTTACAATTTGGACAATATTTTTGGGAGGGGAAATACGAAGAGTTGCGTCACCCTTGGGAAATTTGAGGAAGATTAACTATCATGTTTTGATTTT…	414
402991	HF_READ_05402991	0.75	0.25	0.25	0	0.75	0.25	1	1	1.5	1	0	0	0	0.5	0.25	0	1.25	1	0.5	1.75	0.5	0	0.25	0.25	0.75	0.25	1.75	1	1.5	0.75	19	1	NA	0.0440678	12.1871	Uncultured Prochlorococcus marinus clone HF10-88H9	94.68	539	petF	Ferredoxin	Energy Metabolism	Environmental	ATTGCTGCCTGCATGCCGAGTCTAGAGGATCCCCAGGCGAAGGTCTCAATTCAACTATTGAAGTGCCTGATGACCAATACATCCTAGACGCGGCTGAAGAACAAGGTATCGACCTTCCTTATTCCTGCAGAGCTGGAGCATGTTCAACATGTGCTGGAGAAGTTAAATCAGGTAGTGTTGATCAATCAGATCAAAGTTTCTTGGATGATGACCAACTAGAAGCTGGTTTTGTACTTACATGTGTTGCTTATCCAACATCTGACGTAACAATTACAACTCATGCTGAGGAAGAATAGTACTAATTATAAAAATTTAACTTTTCTAAGTTGATTATTGATTATTTCTCTGCCACCCTCAATGAAGGTGGCCTTTTTTTTGTAAATGGATAAATTTGAATTT…	414
918939	HF_READ_04918939	0	0.25	0	0.75	0	1	0	0	0.25	0	0.5	0.25	0	0.25	0.25	0.25	0.25	0.5	0.75	1.75	0.25	0	0.75	1.25	0.25	0.75	0	0.5	0	1.75	12.5	0	NA	0.855311	2.70842	Uncultured Prochlorococcus marinus clone HOT0M-7B6	94.59	488	petF	Ferredoxin	Energy Metabolism	Environmental	CCAGTGCAGCTTGCATGCCTGCAGGTCGACTCTAGAGGATCCCCGGAATTTGAAAAGAAAGGTTTCAAACTTGCATTTTCATGTAGAAATGGTTGCTGTACAAGTTGTGCAGTTAAAATAATTTCTGGTAGTTTGAAACAACCTGAAGCCATGGGTGTATCTCAAGCCTTAAAAGATAAAGGTTATGCACTACTTTGCGTAGCCAAAGCGACTTCAGATCTTGAGGTAGAAACTACATATGAAGATGAAGTTTACGATTTACAATTTGGACAATATTTTGGAAGGGGAAATACAAGAGTTGCGCCACCTTGGGAGTTTGAGGAAGATTAATTATCATGTTTAAATTAAGTGAAATAGATGAAATTGC	367
427272	HF_READ_05427272	1.5	0.33	0	0	0.17	0.17	0	0.33	0	0	0	0.17	0.17	0.5	0.5	0	0.5	0.83	1.33	2	0.83	0	0.5	0.17	0.5	0	1.17	0.17	0	0.33	12.17	0	NA	0.50133	5.76639	Prochlorococcus marinus str. MIT 9301	97.15	555	petF	Ferredoxin	Energy Metabolism	Environmental	ATTTGAAAAAGACTTTCACAGTCACCATTAAAAATAAGGAAACCGGAAAGGTCTACCAAGAGCAGGTTAATAGTGATGATTACATACTTAAGGAATTTGAAAAGAAAGGTTTCAAACTTGCATTTTCATGTAGAAATGGTTGCTGTACAAGTTGTGCAGTTAAAATTAAATCTGGTACCGTACAACAACCTGAAGCTATGGGTGTATCTCAGGCATTAAAAGACAAAGGCTATGCACTTCTTTGTGTCGCTAAAGCAACTTCAGATCTTGAAGTAGAAACTACATATGAAGATGAAGTTTACGATTTACAATTTGGGGGATCCTCTAGAGTCGACCTGCAGGCATGCAAGGCTGGCCACCTGC	363
906667	HF_READ_04906667	0.25	0	1.25	0.25	0.75	0.25	0.25	0.25	0.25	0	0	0	0.25	1	0.25	0	0.75	0.25	0.25	0.5	1	0.25	0	0.75	0.25	0	1	0.25	0.25	0.75	11.25	0	NA	0.58068	5.04857	Prochlorococcus marinus str. MIT 9312	90.12	434	petF	Ferredoxin	Energy Metabolism	Environmental	AAATGGCTTCTTACAAAGTTACACTCATCAACGAAGGTGAAGGTCTCAATTCAACTATTGAAGTACCAGATGATCAATACATCCTCGATGCTGCTGAGGAGCAAGGTATCGATCTCCCTTATTCATGCAGAGCTGGAGCTTGCTCAACATGCGCAGGCAAGGTTGCTTCAGGTAGTGTTGATCAATCAGATCAGAGTTTCTTGGATGACGATCAACTAGAAGCTGGTTTCGTGCTCACTTGTGTAGCTTATCCAACATCTGACGTAACAATTACAACTCATGCTGAGGAAGAATTGTATTAATTATAAAATAATTAAATATTTAAGTTGATAATTTATTCTATCTCTGCCACCCTCTAAAAAGGTGGCTTTTTTTTGCGAAAATGAATAACTTTGAATT…	414
821663	JCVI_READ_1091140821663	0	0.67	0.67	0	0	1.33	0	0.33	0	0	1	0	0	1	0.67	0	0	0.33	0.67	0	0	0.33	0.67	0	0.33	0	0.33	0.33	0.67	0.67	10	0	NA	0.921248	1.98185	Prochlorococcus marinus str. AS9601	91.78	389	petF	Ferredoxin	Energy Metabolism	Environmental	AAATGGCTTCTTACAAAGTTACACTCATTAGCGAAGGTGAAGGTCTCAATTCAACTATTGAAGTACCTGATGACCAATACATCCTTGACGCGGCCGAGGAGCAGGGCATTGATCTTCCTTATTCATGCAGAGCTGGAGCATGTTCAACATGTGCTGGAAAAGTCACGGCAGGTAGTGTTGATCAATCGGATCAGAGTTTCTTGGATGATGATCAGCTAGAAGCTGGTTTTGTACTCACATGTGTTGCTTATCCAACATCTGATGTAACAATTACAACTCATGCTGAGGAAGAATTATATTAATTATAAAAAATTAACTTATTTAAGTTGATTATTTATTACATATCTGCCACCCTCTGTGAAGGTGGTTTTTTTTTGAATGAATAAATTCGAATTTTTT…	414
574507	JCVI_READ_1105333574507	0	0.5	0.25	0	0	0	0	0	0.5	0.25	0	0.25	0.5	0	1	0.75	0.25	0.25	0	0	0	0	0.5	0.5	0	0	0	0	0.5	0.5	6.5	0	NA	NA	NA	Uncultured Prochlorococcus marinus clone HOT0M-7B6	94.13	573	petF	Ferredoxin	Energy Metabolism	Environmental	ATTTGAAAAAGACTTTCACAGTCACCATTAAAAATAAGGAAACAGGAAAGTTCTACCAAGAGCAGGTTAATAGTGATGAGTACATACTTAAGGAATTTGAAAAAAAAGGTTTCAAACTGGCTTTTTCATGTAGAAATGGTTGCTGTACAAGTTGTGCAGTTAAAATAATTTCTGGTAATTTGCAACAACCTGAAGCCATGGGTGTATCTCAAGCCTTAAAAGATAAAGGTTATGCACTACTTTGCGTCGCCAAAGCAACTTCAGATCTTGAGGTTGAAACTACATATGAAGATGAAGTTTACGATTTACAATTTGGACAATATTTTGGGAGAGGGAATACAAGAGTTGCGCCACCCTGGGAGTTTGAGGAAGATTAATTATTATGTTTGAATTAAGTGA…	414
811294	HF_READ_04811294	0	0	0.4	0	0	0	0	0	0.6	0	0	0	0.4	0	0.4	0	0	0.4	0.2	0.4	0.6	0	0	0	0	0	0.4	0	1.2	0	5	0	NA	NA	NA	Prochlorococcus marinus str. AS9601	93.97	593	petF	Ferredoxin	Energy Metabolism	Environmental	TACTGAAGCTGGTCCTTCACAGTCACGATTAAAATNAAGAAACTGGAAAGGTCTACCAAGAGCAGGTTAATAGTGACGAGTATATACTTAAGGAATTTGAAAAGAAAGGGTTCAAACTTGCATTTTCATGTAGAAATGGTTGCTGTACAAGTTGTGCAGTTAAAATAATATCTGGTACTTTACAACAACCTGAAGCCATGGGCGTTTCTAAGGCCTTAAAAGACAAAGGTTATGCACTTCTTTGTGTTGCCAAAGCAACTTCAGATCTTGAGGTTGAAACTACATATGAAGATGAAGTATACGATTTGCAATTTGGACAATATTTTGGAAGAGGAAATACAAGAGTTGCGCCTCCTTGGGAATTTGAGGAAGATTAATTATCATGTTTGAATTAAGTGA…	414
867295	HF_READ_04867295	2	1	1.33	0.67	1.83	2	0.5	0.17	0.67	0.83	1	0.67	2.17	4.83	4	2.5	1.17	1.5	2.17	1.33	0.33	0.83	2	1.83	2.17	0.67	1.83	1.33	0.17	1.83	45.33	7	Yes	0.144817	9.78897	Prochlorococcus marinus str. AS9601	96.1	601	petF	Ferredoxin	Energy Metabolism	Environmental	AAATGGCTTCTTACAAAGTTACACTCATCAGCGAAGGTGAAGGTTTCAATTCAACAATCGAAGTACCTGATGACCAGTACATCCTCGATGCTGCTGAAGAACAAGGTATCGACCTTCCTTATTCCTGCAGAGCTGGAGCATGTTCAACATGTGCTGGAAAAGTTACTTCAGGCAGTGTTGATCAATCTGATCAAAGTTTCTTAGATGATGACCAACTAGAAGCTGGTTTTGTACTTACATGTGTTGCTTATCCAACATCTGATGTAACAATTACAACTCATGCCGAGGAAGAATTGTATTAATTATAAAAAATTAACTTTTCTAAGTTGATTATTCATTATTTCTCTGCCACCCTCTATAGAGGTGGCTTTTTTTGTGAATGAATAAATTTGAATTTTT…	414
985602	HF_READ_04985602	0.6	0.6	0.6	0	0.2	0.6	0.4	0.2	0.2	0.2	0.2	0.2	1	2.4	1.6	1.8	0.2	0.4	3.2	2.4	3.4	1.4	2	3.4	0.8	0	0.6	0.4	1	1.2	31.2	5	Yes	0.150667	9.69993	Uncultured Prochlorococcus marinus clone HF10-11D6	96.67	567	petF	Ferredoxin	Energy Metabolism	Environmental	ATATGCCTGAATACAATATCAAAGTTCAATTTGAGCAAAAGACGTTTAGTTTTTTATGTTCTGAAGATCAAGATATTATTTCAGCGGCAAAAATGAATGGAATAGATTTACCAAGTAGTTGTTGTTCAGGAGTTTGTACAGATTGTGCATCCATGATATTGGAAGGATCTGTAGATCAAGAAGATGCTATGGGATTAAATGATGATTTGAGGGAAAAAGGCTTTGCACTTTTATGTGTGGCATATCCCAAGTCAAATTTGAATATTGTTATTGGTAAAGAAGTCGAAGATGATTTATATAATGATCAATTTGGTAAATATCAAAAATGAAGGGGATCCTCTAGAGTCGACCTGCAGGCATGCAAGCTGCACTGC	374
994178	HF_READ_04994178	0.5	0.83	0.5	0	0.17	0.67	0.17	0.17	0.17	0.5	0.5	0.17	1	2.5	2.17	1.67	0.33	0.67	2	1.67	2.67	1.67	2.17	2.33	0.83	0	0.5	0.5	1	1.17	29.2	5	Yes	0.115	10.2868	Prochlorococcus marinus str. AS9601	96.37	654	petF	Ferredoxin	Energy Metabolism	Environmental	ATATGCCTGAATACAATATCAAAGTTCAATTTGAGCAAAAGACTTTTAGTTTTTTATGTTCTGAAGATCAAGATATTATTTCAGCGGCAAAAATGAATGGAATAGATTTACCAAGTAGTTGTTGTTCAGGAGTTTGTACAGATTGTGCATCCATGATATTGGAAGGATCTGTAGATCAAGAAGATGCTATGGGATTAAATGATGATTTGAGGGAAAAGGGCTTTGCACTTTTATGCGTGGCATATCCCAAGTCCGATTTGAATATTGTTATTGGTAAAGAAGTCGAAGATGATTTGTATAATGATCAATTTGGTAAATATCAAAAATGAAATTAAGTTCAGTTGATTACTATTTAGATTGGCCAGCTTCAATAAAAGTAAAAAATTAAGGAATTCATCA…	412
52603	JCVI_READ_1092342052603	0.5	0	0.75	0	0	0	0	0	0	0.75	0.5	0	0.25	1	1	1	0.5	0	2.25	0.5	1	0.25	0.25	0.5	1	0	0	0	0	1.5	13.5	0	NA	0.861258	2.64545	Prochlorococcus marinus str. MIT 9312	94.58	605	phnD	Phosphonate ABC transporter, phosphonate-binding protein	Membrane Transport	Clone	TATTTTAGACAAAAGATTTAAGTTATTTTCAAAAGAATTATCCAAACAACTTGGTGTAGAAGTTAAATACATTCCTGTCATTAATTATGTTGCAGCAGTTACTGGATTTAGAACTAAAGATTTAGATTTAGTTTGGTTTGGTGGTTTATCAGGAGTTCAAGCTAGATTACAAACTTCTAATTCAATTGTCATAGCTCAAAGAGATATTGATAAGGAATTTAAAAGTGTTTTTATAGTAAACAAAAATTTAGAACTTAACTCAATTTCAAGCATTAAAGGACTAAAAAAACTAAAGAATTTAAGATTTACTTTTGGCTCTGAAAACTCAACTTCTGGAAGATTAATGCCAGAATATTTCTTAAATCAAGCAGGGGTAAAAATTAATCACTTTAAAGGGGG…	406
400316	JCVI_READ_1092982400316	0.5	0.75	0.5	0.25	0	0.75	0	0.25	0	0.75	0.25	0.25	0.5	0.5	2.5	0.75	0.75	0.5	0.75	2.5	2.25	0.75	1.75	2.25	0	0.25	0.5	1.25	0	2.5	24.5	0	NA	0.320021	7.44175	Prochlorococcus marinus str. MIT 9312	91.48	1138	phoH	Phosphate starvation-inducible protein	Unclassified	Environmental	GATGACGGAAGTTTCCAAAACTGGTCACTTCACAATAGATTTGCCAAGCTCTGATGCGGCTACAGCATTATCTGGACCTGGTAATTCTTTTTTAAAAAAGTTTGAGTCTCTCACAGGAGTTTCTTTAACTATAAGAGGTTTACAACTTGAGATGAACGGTGTCATATCTAAAATTGAGCGAGCGTCTGCATTAGTAGAGCTGACAAGACCAATTTGGGAACAAGGGTTAGAAGTCCCAGAGGTAGATCTTAAAGCGGCTTTAAGTTCTCTAAATATGGGAGAGTCGTCTTCACATGCTGAACTTGGGAAAAAAGTTCTTGCGCGTTCCAAAGAAGGTAGATATTTAAGGCCAAGAACTATAAGGCAAAAAGAATATGTTGAATCAATAGAAAACTTTGA…	978
769581	HF_READ_04769581	0.67	0.67	0.17	0.5	0.17	0.17	0.17	0.17	0.33	0.33	0.33	0.5	0	0.17	1.33	1.17	0.5	0.17	1.5	1.83	0.5	1	1.17	1.17	1	0.33	0.67	1	0.5	1.5	19.69	0	NA	0.45825	6.14986	Prochlorococcus marinus str. AS9601	98.36	749	phoH	Phosphate starvation-inducible protein	Unclassified	Environmental	AAAGGCAAGGCTTGCATGCCTGCAGGTCGACTCTAGAGGATCCCAAAAAGTAGATCCATATTTAAGACCCCTATTTGATTCTTTACATAGTATTTTCGGGATTGACAGAACAAATTCGTTAATTGATAAGGGAATTATTGAAGTTGCTCCTTTGGCATTTATGAGAGGCAGAACCTTAGATAACTCCATAGTTATCCTAGATGAAGCCCAAAATACTACTTGCTCTCAAATGAGAATGTTTTTGACCAGATTAGGAGAGAGATCAAAAATGGTTGTAAATGGAGATATTACACAAATTGATTTAAAAAAAGATCAAGAAAGCGGCCTCATCGAAGCATCGAGAATTTTCTCTGAAACTCAAGGTATAAAATTTTGTTATTTAACTGTTGAAGATGTGGT…	533
942758	HF_READ_04942758	0.5	0.17	0.17	0.33	0.17	0.5	0	0.5	0	0.33	0.67	0	0.17	0.67	1	1.33	0.33	0.33	0.83	0.67	1.33	0.67	1	0.33	0	0	0.33	0.33	0.33	0.67	13.66	0	NA	0.951424	1.53332	Prochlorococcus marinus str. MIT 9301	96.05	916	phoH	Phosphate starvation-inducible protein	Unclassified	Environmental	GCAGGTGCAGCTTTGCATGCTGCAGGTCGACTCTAGAGGATCCCCAAACTTTGATCTTACCTTTGCGATAGGTCCAGCTGGAACTGGTAAGACATTTTTAGCAACTGTTTGCGCGGCAAGGCTATTGAACGAGAAAAAAATTGAAAAAATTGTTTTAACCAGACCAGCTGTAGAAGCTGGTGAAAGTTTGGGATTTTTACCTGGTGATTTGCAACAAAAAGTAGATCCATATTTAAGACCCTTATTTGATTCTTTACATAGTATTTTCGGGTTTGATAGAACAAATTCGTTAATTGATAAGGGAATTATTGAAGTTGCCCCTTTGGCATTTATGAGAGGAAGAACCTTAGATAATTCATTGATTATCTTGGATGAAGCACAAAATACTACTTGCTCTCA…	704
848640	HF_READ_04848640	0	0.25	0.25	0	0.5	0.25	0.25	0.25	0.25	0.25	0	0.25	0	0.5	0.5	0.25	0.5	0.25	0.5	1.25	1	0.75	1.75	1	0.5	0	0.5	0.25	0	1	13	0	NA	0.394427	6.7281	Prochlorococcus marinus str. AS9601	96.56	902	phoH	Phosphate starvation-inducible protein	Unclassified	Environmental	CAAGATGGCCCGACGAGGCAGGCAGCTGCATTGCTGCAGGTTACTCTAGAGGATCCCAGAAAAAAATTGAAAAAATTGTTTTAACCAGACCAGCTGTAGAAGCTGGTGAAAGTTTAGGATTTCTGCCTGGTGATTTGCAACAAAAAGTAGATCCATATTTAAGGCCCCTATTTGATTCTTTACATAGTATTTTCGGTATTGACAGAACAAATTCGTTAATTGATAAGGGAATTATTGAAGTTGCTCCTTTGGCATTTATGAGAGGCAGAACCTTAGACAACTCCATAGTTATCCTAGATGAAGCACAAAATACTACTTGCTCTCAAATGAGAATGTTTTTGACCAGATTAGGAGAGAGATCAAAAATGGTTGTAAATGGAGATATTACACAAATTGATT…	630
912702	JCVI_READ_1091120912702	0	1.25	0	0.5	0	0.25	0	0	0	0	0	0.25	0.25	0.25	0.5	0.25	0.75	0.25	0.25	1.25	0.5	0.5	0.25	1.5	0	0	0.25	0	0.25	0.75	10	6	NA	0.238433	8.37635	Prochlorococcus marinus str. MIT 9312	91.63	1239	phoH	Phosphate starvation-inducible protein	Unclassified	Environmental	AAATGAAAGAAGTTTCCAAAACTGGTCACTTCACAATTGATTTGCCAAACTCTGATGCTGCTACAGCATTATCTGGACCTGGGAATTCTTTTTTAAAAAAGTTTGAGTCTCTTACAGGAGTTTCTTTAACTATTAGAGGATTACAACTAGAGATGAACGGTGTCATATCTAAGATAGAGAGAGCTTCAGCCTTGGTAGAGTTGACAAGACCTATTTGGGAACAAGGATTAGAAGTTCCAGAGGTAGATCTTAAAGCTGCTCTAAGCTCTTTAAATATGGGAGAGTCATCTTCACATGCTGAACTTGGAAAAAAAGTTCTTGCTCGTTCCAAAGAAGGAAGATACTTAAGACCAAGAACTATAAGGCAAAAAGAATATGTTGAATCAATTGAAAACTGTG…	1050
738951	JCVI_READ_1093015738951	0.2	0.6	0.2	0	0.2	0.2	0	0	0	0.2	0	0	0.2	0.4	1.2	0.4	0	0.2	0.4	0.6	0.2	0.4	0.8	1	0	0	0.2	0	0.2	0.4	8.2	0	NA	NA	NA	Prochlorococcus marinus str. MIT 9312	91.26	1176	phoH	Phosphate starvation-inducible protein	Unclassified	Environmental	AGATGACGGAAGTTTCCAAAACTGGTCACTTCAAAATAGATTTGCCAAGCTCTGATGCAGCTACAGCATTGTCAGGTCCCGGTAATTCTTTCTTAAAAAAATTTGAGTCTCTTACTGGAGTTTCTTTAACTATAAGAGGCTTGCAACTTGAGATGAACGGCGTCATATCTAAAATTGAGAAAGCTTCAGCATTAGTAGAGCTGACAAGACCAATTTGGGAACAAGGGTTAGAAGTCCCAGAGGTAGATCTCAAAGCGGCTTTAAGTTCCTTAAATATGGGAGAGTCATCTTCACATGCAGAACTTGGGAAGAAAGTCCTAGCGCGTTCAAAAGAAGGAAGATATTTAAGACCTAGAACTATAAGGCAAAAAGAATATGTTGAATCAATTGAAAACTTTG…	958
441596	JCVI_READ_1104230441596	0.17	0.33	0	0	0.17	0	0.17	0	0	0.17	0.33	0.17	0.67	0.17	0.33	0.17	0.17	0.33	0.33	0.17	0.67	0.33	0.67	0.5	0.17	0	0.33	0.33	0.5	0.5	7.85	0	NA	NA	NA	Uncultured Prochlorococcus marinus clone HF10-88G4	94.44	1195	phoH	Phosphate starvation-inducible protein	Unclassified	Environmental	AGATGAAAGAAGTTTCCAAAACTGGTCACTTCACAATAGATTTGCCAAGCTCTGATGCTGCTACTGCATTATCTGGCCCTGGTAATTCTTTTTTAAAAAAGTTTGAGTTACTCACAGGTGTATCTCTAACTATTAGAGGGTTACAACTTGAGATGAACGGTGTTATTTCTAAAATTGAAAGAGCATCAGCATTAGTAGAACTAACAAGACCAATTTGGGAACAAGGGTTAGAAGTCCCAGAGGTGGATCTGAAAGCGGCTTTAAGTTCTCTAAATATGGGAGAGTCATCTTCACATGCTGAACTTGGGAAAAAAGTTCTTGCGCGTTCCAAAGAAGGAAGATATTTAAGACCAAGAACTATAAGGCAAAAAGAATATGTTGAATCAATTGAAAACTTTG…	885
904014	HF_READ_04904014	0	1	1	0.67	0	1	0	0	0	0	0	0	0	0	1.67	0	0	1	0.33	0	0.33	0	0.67	0	0	0	0	0	0	0	7.67	0	NA	NA	NA	Prochlorococcus marinus str. MIT 9301	91.67	355	phoH	Phosphate starvation-inducible protein	Unclassified	Environmental	ATTCCCCGGAATTTCCAAAAAATAATCCTATTAAAGCCCTATTATTTTTGCAAAAATTTGTTTGTAGAATAATTCTTTAAAGTAAAGGAATTATGAAGTGTTCTTTGACATTTATGAGGGTCGAACTTAAGTAATTCTTTGTTAATCTTGATGAAGCACAAAACCATACTTGTTTTTCAATGAGAATGTTTTTAACCAGATGGGTGAGAGATCCAAAAATGGTGTAAACGGAGATATTACACAAATTGATTTAAAAAAAGATCAGGAAAGCGGCCTCATCGAAGCATCAAGAATTTTTTCTGAAACTGAAGGTATAAAATTTTGTTATTTAACAGTTGAAGACGTAGTTCGTCATCCTTTAGTTCAGAAAATTATTGAGGCTTATCAATAACTTTGTAA…	489
953020	HF_READ_04953020	0.17	0	0.17	0	0	0	0.33	0	0	0.67	0	0	0	0.67	0.17	0.33	0.17	0.17	0.83	0.83	0.67	0.17	0.33	0.83	0	0	0.33	0.17	0	0.33	7.34	0	NA	NA	NA	Prochlorococcus marinus str. MIT 9301	94.93	948	phoH	Phosphate starvation-inducible protein	Unclassified	Environmental	GCCAGTGCAAGCTTGCATGCCTGCAATCGACTCTAGAGGATCCCCTAAGGCAAAAAGAATATGTTGAATCAATTGAAAACTTTGATCTTACGTTCGCAATTGGGCCAGCTGGAACTGGCAAGACATTTTTGGCAACTGTTTGCGCGGCAAGGCTATTGAACGAGAAAAAAATTGAAAAAATTGTTTTAACCAGACCAGCTGTAGAAGCTGGTGAAAGTTTGGGATTTCTACCTGGTGATTTGCAACAAAAAGTAGATCCATATTTAAGACCCTTATTTGATTCTTTACATAGTATTTTCGGGTTTGATAGAACAAATTCGTTAATTGATAAGGGAATTATTGAAGTTGCTCCTTTGGCATTTATGAGAGGCAGAACCTTAGACAACTCCATAGTTATCC…	735
951574	HF_READ_04951574	0.33	0	0	0	0	0.17	0.17	0.5	0.17	0	0	0.17	0	0.5	0.33	0.67	0.17	0.5	0	0.67	0	0.5	0.33	1.17	0	0	0.17	0.17	0.17	0.33	7.19	0	NA	NA	NA	Prochlorococcus marinus str. MIT 9301	95.75	539	phoH	Phosphate starvation-inducible protein	Unclassified	Environmental	ACAGGCTCGGGTACCGAATCATTGAGTTGCCCCTTTAGCATTTATGAGAGGAAGAACCTTAGATAATTCTTTGATTATCTTGGATGAAGCACAAAATACTACCTGCTCTCAAATGAGAATGTTTTTGACCAGATTAGGAGAGAGATCAAAAATGGTTGTAAACGGAGATATTACACAAATTGATTTAAAAAAAGATCAGGAAAGCGGCCTCATTGAAGCATCGAGAATTTTCTCTGAAACTGAAGGTATAAAATTTTGTTACCTTACTGTTGAAGATGTGGTTCGTCATCCTTTAGTTCAGAAAATTATTGAGGCTTATCAATAAATTTATAACTCTGGTGATCCGTACACTGAAATTTTAAAAATCAATTAGAATAAGACCATATTTAATAAAAAAAA…	416
813708	HF_READ_04813708	0	0	0	0	0	0	0	0	0	0	0	0.25	1	0.75	0	0	0	0.75	0.75	0.5	0.75	0.5	1.25	0.5	0	0	0	0	0	0	7	0	NA	NA	NA	Uncultured Prochlorococcus marinus clone HF10-88G4	96.53	846	phoH	Phosphate starvation-inducible protein	Unclassified	Environmental	ACGACCGCAGTGCAGCTTGCATGCCTGCAGGTCGACTCTAGAGGATCCCAAGACATTTTTAGCAACTGTTTGCGCGGCACGACTATTGAATGAGAAAAAAATTGAAAAAATTGTTCTAACCAGACCAGCTGTAGAGGCTGGTGAAAGTTTGGGATTTCTACCTGGTGATTTGCAACAAAAAGTAGATCCATATTTAAGACCCCTATTTGATTCTTTACATAGTATTTTTGGGTTTGATAGAACAAATTCGTTAATCGATAAGGGAATTATTGAAGTTGCACCTTTAGCATTTATGAGAGGCCGAACCTTAGATAACTCCATGGTTATCCTAGATGAAGCACAAAATACTACTTGCTCTCAAATGAGAATGTTTCTAACCAGATTGGGCGATAGATCTAA…	665
976025	HF_READ_04976025	0	0.67	0	0	0	0.17	0	0	0	0	0.17	0.17	0	0.33	0.67	0.83	0	0	0.33	0.33	0	0.33	0.5	0.33	0	0	0	0	0	0.67	5.5	0	NA	NA	NA	Prochlorococcus marinus str. MIT 9312	91.11	448	phoH	Phosphate starvation-inducible protein	Unclassified	Environmental	AGATGACGGAAGTTTCCAAAACTGGTCACTTCAAAATAGATTTGCCAAGCTCTGATGCTGCTACAGCATTGTCAGGCCCCGGTAATTCTTTCTTAAAAAAATTTGAGTCTCTTACTGGAGTTTCTCTAACTATAAGAGGCTTGCAACTTGAGATGAATGGCGTAATATCTAAAATTGAGAAAGCTTCAGCATTAGTAGAGCTGACAAGACCAATTTGGGAACAAGGGTTAGAAGTCCCAGAGGTAGATCTCAAAGCAGCTTTAAGTTCTTTAAATATGGGAGAGTCATCTTCACATGCAGAACTTGGGAAGAAAGTCCTAGCGCGTTCAAAAGAAGGAAGATATTTAAGACCTAGAACTATAAGGCAAAAAGAGGGGATCCTCTAGAGTCGACCTGCAG…	422
37265	HF_READ_05037265	0	0.5	0	0	0	0	0	0	0	0.33	0.17	0.5	0	0.17	0.5	0.17	0	0	0.33	0.33	0	0	0.5	0.5	0.33	0.17	0	0	0.33	0.5	5.33	0	NA	NA	NA	Uncultured Prochlorococcus marinus clone HF10-88G4	95.01	628	phoH	Phosphate starvation-inducible protein	Unclassified	Environmental	AAATGAAAGAAGTTTCCAAAACTGGTCACTTCACAATAGATTTGCCAAGCTCTGATGCTGCTACAGCATTATCTGGCCCAGGTAATTCTTTCTTAAAAAAGTTTGAGTCATTAACAGGAGTTTCTTTAACTATAAGAGGCTTACAACTTGAGATGAACGGTGTTATTTCTAAAATCGAAAGAGCCTCAGCATTAGTAGAATTAACAAGACCAATTTGGGAACAAGGGTTAGAAGTCCCAGAGGTAGATCTTAAAGCGGCTTTAAGTTCTCTTAATATAGGAGAATCATCTTCACATGCTGAACTTGGGAAAAAGGTTCTTGCGCGTTCCAAAGAAGGAAAATATTTAAGACCAAGAACTATAAGTCAAAAAGAATATGTTGAATCAATTGAAAATTTGA…	422
390651	CAM_READ_0235390651	1	0	0	0	0	0	0	0	0	0	0	0	0	0	1	0.5	0	0	0	0.25	0.5	0	0	1.25	0	0	0.75	0	0	0	5.25	0	NA	NA	NA	Prochlorococcus marinus str. MIT 9312	91.81	513	phoH	Phosphate starvation-inducible protein	Unclassified	Environmental	CATTAATAGATAAAGGAATTATTGAAGTTGNTCCTTTAGCATTTATGAGAGGCAGAACCTTGGATAACTCTTTGGTAATTTTAGATGAAGCACAAAACACAACTTGCTCTCAAATGAGAATGTTTTTAACCAGATTAGGTGAGAGATCAAAAATGGTTGTAAACGGAGATATTACTCAAATAGATTTAAAAAAAGATCAACAAAGTGGCCTGATTGAGGCATCAACTATTTTTTCTGAAACTGAGGGTATAAAATTTTGTTATTTAACTGTCGAGGATGTAGTTCGTCATCCTTTAGTTCAGAAAATTATTGAGGCCTATCAATAATTTTGTAACTATGGTGATCCGTACACTGAAAATTTAAAAATCAAGTACAATAAGATCATGTTTATTAAAGAAA…	417
892211	JCVI_READ_892211	13.5	8.5	9	9.5	16	24	29	1.5	8	9	7.5	3	15	15.5	40	26.5	13	6	30	7.5	17	12	21.5	25.5	25	6	16	14	9.5	20	458.5	4	Yes	0.0231088	13.1607	Prochlorococcus marinus str. AS9601	91.42	821	phoH	Phosphate starvation-inducible protein	Unclassified	Environmental	GGGCTGGAAGAAAAATTGAGAAATTATTCTAACCAGACCAGCTGTAGAAGCTGGTGAGAGTTTGGGATTTCTACCTTGGTGATTTACAACAAAAAGTAGATCCATATTTAAGACCCCTGTTTGATTCTTTACATAGTATTTTTGGGTTTGATAGAACAAATTCGTTAATAGATAAGGGAATCATTGAAGTTGCACCTTTAGCGTTTATGAGAGGCAGAACCTTGGATAACTCTTTAGTAATTCTTGATGAAGCGCAAAATACTACTTGCTCTCAAATGAGAATGTTTTTGACCAGATTAGGTGATAGATCAAAAATGGTTGTTAATGGAGATATTACTCAAATTGATTTAAAAAAAGATCAGGAAAGTGGTCTGGTCGAGGCATTAAGGATTTTCTCTG…	728
562507	JCVI_READ_1091141562507	4	1.8	5.2	5.8	5.2	18.2	11.8	0	5.6	5.4	4.4	2.2	5.8	6.8	19.6	13.2	10.8	6	16.8	4.2	5.4	4.4	11	11	14.4	2.2	9.4	3.8	3	9	226.4	4	Yes	0.0269268	12.934	Prochlorococcus marinus str. MIT 9301	94.42	1098	phoH	Phosphate starvation-inducible protein	Unclassified	Environmental	AGACCTATAAGGCAAAAAGAATATGTTGAATCAATTGAAAACTTTGATCTTACATTCGCATGGTCCAGCTGGTACTGGTAGACATTTTTAGCAACTGTTTGCGCGGCAAGACTATTGAACGAGAAAAAAATTGAAAAAATTGTTTTAACCAGACCAGCTGTAGAAGCTGGTGAAAGTTTGGGATTTCTACCTGGTGATTTGCAACAAAAAGTAGATCCATATTTAAGACCCCTATTTGATTCTTTACATAGTATTTTTGGGTTTGATAGAACAAATTCGTTAATCGATAAAGGAATTATTGAAGTTGCTCCTTTGGCATTTATGAGAGGAAGAACCTTAGAGAATTCTTTGATTATCTTGGATGAAGCACAAAATACTACTTGCGCTCAAATGAAAATG…	847
798740	JCVI_READ_1091140798740	1.6	2.8	2.2	0.4	0.4	1	0	0	0	0.8	2	2	1	3.2	9.2	4.4	1.2	0.2	2.8	4.2	5	2.8	6	7.6	0.8	0.4	1.2	1	1.8	6.6	72.6	5	Yes	0.0556917	11.8103	Prochlorococcus marinus str. AS9601	96.04	543	phoH	Phosphate starvation-inducible protein	Unclassified	Environmental	AGATGAAGGAAGTTTCCAAAACTGGTCACTTCAAAATAGATTTGCCAAGCTCTGATGCCGCTACAGCATTATCTGGACCTGGTAATTCGTTCTTAAAAAAATTTGAGTCTCTTACAGGAGTTTCTTTAACTATAAGAGGCTTACAACTTGAGATGAACGGTGTCATATCTAAAATTGAAAGAGCTTCCGCATTAGTAGAACTAACAAGACCAATTTGGGAACAAGGGTTAGAAGTCCCAGAGGTAGATCTTAAAGCGGCTTTAAGTTCTTTAAATACGGGTGAATCGTCTTCACATGCTGAACTCGGAAAAAAAATTCTTGCACGTTCCAAAGACGGAAGATATTTAAGACCAAGAACTATAAGGCAAAAAGAATATGTGAAACAGATGAGAACCCTCC…	409
569886	HF_READ_05569886	0.17	2.5	1.33	1	1	0.67	0	0.33	0.5	2.5	1.17	0.17	0.67	2.5	6.83	4	0.67	0.67	1	3.5	4.17	3.5	5.5	8.17	0.83	0	1.33	1.33	1.33	4.67	62.01	5	Yes	0.0967722	10.6636	Prochlorococcus marinus str. AS9601	96.64	837	phoH	Phosphate starvation-inducible protein	Unclassified	Environmental	AGATGAAGGAAGTTTCCAAAACTGGTCACTTCAAAATAGATTTGCCAAGCTCTGATGCCGCGACAGCATTATCTGGACCTGGCAATTCTTTCTTAAAAAAATTTGAGTCTCTTACAGGAGTTTCTTTAACTGTAAGAGGCTTACAACTTGAGATGAACGGTGTCATATCCAAAATTGAGAGAGCCTCAGCATTAGTAGAACTAACAAGACCAATTTGGGAACAAGGGTTAGAAGTCCCAGAGGTAGATCTTAAAGCGGCTTTAAGTTCTTTAAATATGGGCGAATCGTCTTCACATGCTGAACTAGGAAAAAAAATTCTTGCGCGTTCCAAAGAAGGAAGATATTTAAGACCAAGAACTATAAGGCAAAAAGAATATGTTGAATCAATTGAAAACTTTG…	651
519406	HF_READ_05519406	0.4	1.8	1.2	1.2	1	0.6	0.2	0.4	0.6	1.6	1.2	0.2	0.6	2.4	7	4	0.2	0.8	0.8	2.8	4.6	3.8	4.6	7.8	0.8	0	1.4	1.6	1.2	4	58.8	5	Yes	0.0770357	11.1955	Prochlorococcus marinus str. AS9601	97.67	682	phoH	Phosphate starvation-inducible protein	Unclassified	Environmental	AGATGAAGGAAGTTTCCAAAACTGGTCACTTCAAAATAGATTTGCCAAGCTCTGATGCTGCTACAGCATTATCTGGACCTGGTAATTCTTTCTTAAAAAAATTTGAGTCTCTTACAGGAGTTTCTTTAACTATAAGAGGCTTACAACTTGAGATGAACGGTGTCATATCTAAAATCGAGAGAGCCTCAGCATTAGTAGAACTAACAAGACCAATTTGGGAACAAGGGTTAGAAGTCCCAGAGGTAGATCTTAAAGCGGCTTTAAGTTCTTTGAATATGGGCGAATCGTCTTCGCATGCTGAACTAGGAAAAAAAATTCTTGCGCGTTCCAAAGAAGGAAGATATTTAAGACCAAGAACTATAAGGCAAAAAGAATATGTTGAATCAATTGAAAACTTTG…	475
700661	JCVI_READ_1108839700661	1.6	1.4	1.6	0.6	0.4	0.6	0.4	0	0.2	1.6	1.6	0.6	1	3.2	4.8	3.2	1.4	0.4	2.8	4.6	3.8	3	5	5	0.8	0.8	1	1.4	0	4.4	57.2	5	Yes	0.0946497	10.7119	Prochlorococcus marinus str. MIT 9312	92.61	567	phoH	Phosphate starvation-inducible protein	Unclassified	Environmental	AAATGAAAGAAGTTTCCAAAACTGGTCACTTCACCATAGATTTGCCAAGCTCTGATGCTGCTACAGCATTATCGGGACCCGGAAATTCATTCTTAAAAAAGTTTGAATCTCTAACAGGAGTTTCCTTAACCATAAGAGGTTTACAACTTGAGATGAACGGTGTCATATCTAAGATTGAGAGAGCATCAGCATTAGTAGAGCTAACAAGACCAATTTGGGAACAAGGATTAGAAGTACCAGAGGTAGACCTTAAAGCCGCTTTAAGTTCTTTAAATATGGGAGAATCATCTTCACATGCTGAACTTGGGAAGAAAGTCCTAGCGCGTTCCAAGGAAGGAAGATATTTAAGACCAAGAACTATAAAGCAAAAAGAATATGTTGAATCAATTGAAAACTTTG…	438
861880	HF_READ_04861880	0.67	1.67	1.67	0.5	0.17	0.67	0	0.17	0.33	0.33	1.17	0.5	0.33	2	5.5	3	0.67	0.17	1.83	3.17	3.83	2.17	3.67	6.83	0.83	0.17	0.67	0.67	2	4.67	50.03	5	Yes	0.101312	10.556	Prochlorococcus marinus str. AS9601	96.11	678	phoH	Phosphate starvation-inducible protein	Unclassified	Environmental	TAGATGAAGGAAGTTTCCAAAACTGGTCACTTCAAAATAGATTTGCCAAGCTCTGATGCCGCTACAGCATTATCTGGACCTGGTAATTCTTTCCTAAAAAAATTTGAGTCTCTTACAGGAGTTTCTTTAACTATAAGAGGTTTACAACTTGAGATGAATGGTGTCATATCTAAAATTGAGAGAGCTTCAGCATTAGTAGAACTAACAAGACCAATTTGGGAACAAGGGCTAGAAGTCCCAGAGGTAGATCTTAAAGCGGCTTTAAGTTCCTTAAATATGGGCGAATCGTCTTCACATGCTGAACTTGGAAAAAAAATTCTTGCGCGTTCCAAAGAAGGAAGATATTTAAGACCAAGAACTATAAGACAAAAAGAATATGTTGAATCAATTGAAACTTTG…	529
978397	HF_READ_04978397	0.33	1	1	0.67	1	1	0	0.33	0.33	2	0.67	0	0.33	1.67	3.67	3	0.67	0.33	1	2.33	3	2	3	5	0.33	0	1	0.67	0.67	3	40	5	Yes	0.120774	10.1863	Uncultured Prochlorococcus marinus clone HF10-88G4	95.78	1065	phoH	Phosphate starvation-inducible protein	Unclassified	Environmental	TCCCAAAACTGGTCCACTCCAAAATAAGATTTGGCCAAGTTCTGATGCCGCTACAGCATATCTGACTGTAATCTTTTTTAAAAAATTCGGAGTCTTCTACTGGAGTTTCTTTAACTATAAGAGGATTACAACTTGAGATGAACGGTGTCATATCCAAAATTGAGAGAGCCTCAGCATTAGTAGAACTAACAAGACCAATTTGGGAACAAGGGTTAGAAGTCCCAGAGGTAGATCTTAAAGCGGCTTTAAGTTCTTTAAATATGGGCGAATCGTCTTCACATGCTGAACTTGGAAAAAAAAATTCTTGCGCGTTCCAAAGAAGGAAGATATTTAAGACCAAGAACTATAAGGCAAAAAGAATATGTTGAATCAATTGAAAACTTTGATCTTACGTTTGCG…	914
261062	JCVI_READ_1103769261062	0.67	1	1	1.33	0.33	1.33	0	0	0	0.67	0.67	0.33	1	1	1.67	1.67	0	0.33	0.33	3.33	2	0.67	3.33	4	0.67	0.33	1.33	0.33	0	2.67	31.99	5	Yes	0.0184571	13.5327	Uncultured Prochlorococcus marinus clone HF10-88G4	95.41	733	phoH	Phosphate starvation-inducible protein	Unclassified	Environmental	AGATGAAGGAAGTTTCCAAAACTGGTCACTTCACAATAGACTTGCCAAGCTCTGATGCTGCTACAGCATTATCAGGTCCAGGTAATTCTTTCTTAAAAAAGTTTGAATCCTTAACAGGAGTTTCTTTGACCATAAGAGGCTTACAACTTGAGATGAATGGTGTTATATCTAAAATTGAAAGAGCCTCAGCATTAGTAGAACTAACAAGACCAATTTGGGAACAAGGGTTAGAAGTTCCAGAGGTAGATCTTAAAGCGGCTTTAAGTTCCCTAAATATGGGAGAGTCATCTTCACATGCTGAACTTGGAAAAAAAGTTCTTGCGCGTTCAAAAGAAGGCAGATATTTAAGACCAAGAACTATAAGGCAAAAAGAATATGTTGAATCAATTGAAAATTTTG…	568
596490	JCVI_READ_1091140596490	1	1.67	0.67	1	0.67	1	0.33	0	0.33	1.33	1.67	0.33	0.67	0.67	2.33	1.33	0	0	0.33	2	1.33	1.33	3.33	2.67	0.33	0	1.33	0.33	0.33	2	30.31	5	Yes	0.0281221	12.839	Uncultured Prochlorococcus marinus clone HF10-88G4	97.34	724	phoH	Phosphate starvation-inducible protein	Unclassified	Environmental	AGATGAAGGAAGTTTCCAAAACTGGTCACTTCATTATAGACTTGCCAAGCTCTGATGCTGCTACAGCATTATCAGGCCCAGGTAATTCCTTTTTAAAAAAATTTGAGTCCTTAACAGGAGTTTCTTTAACAATAAGAGGCTTACAACTTGAGATGAACGGTGTTATGTCTAAAATTGAAAGAGCCTCAGCATTAGTAGAACTAACAAGACCAATTTGGGAACAAGGGTTAGAAGTTCCAGAGGTAGATCTTAGGGCGGCTTTAAGTTCTCTAAATATGGGAGAGTCATCTTCACATGCTGAACTTGGAAAAAAAGTTCTTGCGCGTTCCAGAGAAGGAAGATATTTAAGACCAAGAACTATAAGGCAAAAAGAATATGTTGAATCAATTGAAAACTTTG…	478
22974	JCVI_READ_1091121022974	0.83	0	0.17	0.17	0	1	0.17	0	0.17	0.5	0.17	0	0.5	0.67	1.33	0.83	0.67	0.33	1.17	0.67	0.5	0.33	1.17	1.5	0.83	0	1.5	0.5	0	0.33	16.01	0	NA	0.291185	7.73934	Prochlorococcus marinus str. MIT 9301	97.26	969	phrB	putative DNA photolyase	Replication and Repair	Environmental	AGATGGCTTTAGCAAAAATATATTGGAAGAATTCACCATTTCAGTTTTAGAGGAATTTAGATAGAAAAATGGTCTAAAAGGGCAAGAAATCCGAAAAAACTTACTAAGCTCCATTAGAATTAATTCTATAACTTTATATGGAGAAATACCCTCAGACGAAATTTTACCTATAAAAAAGAAACTTGTCCAGGAAGAATGCAAGGTGGAAGAAAGAAAGGTTTAGAGAGAATGCAATACTTCTTTAGTAATAAATTAGATTCTTATTCAAAAGATATATCTAGCCCAGAAAAATCATTTGATAGTTGTACAAGACTATCCCCATACATTTGTTGGGGATGCATTTCATTAAAAGAAATTTTTAAAAAGGCAAATATATCAAAAAACAATAATTCCAGGATG…	1056
33022	HF_READ_05033022	0.2	0.6	0	0.2	0.2	0.6	0	0	0.2	0.2	0.6	0	0.2	2.6	0.8	1.4	0.6	0.2	0.2	0.8	0.6	0.4	1.2	0.4	0	0.2	0.8	1	0.4	1.2	15.8	0	NA	0.54042	5.41288	Prochlorococcus marinus str. MIT 9301	97.28	819	phrB	putative DNA photolyase	Replication and Repair	Environmental	GCAGTGCAGCTTGCATGCCTGCAGGTCGACTCTAGAGGATCCCCAACGGGGAGACCGGTGTACCTATAGTTGATGCTTCAATGCGTCAACTAAATAGTACTGGCTGGATGCATAACAGATGTAGGATGATAGTCGCTTCATTTCTGGTAAAAGATCTTATATGCAATTGGCAAATGGGCGAGAAAAAATTTATGGAGACTTTGGTTGATGGAGACTTAGCTGCAAATAATGGCGGATGGCAGTGGAGCGCCAGTAGCGGTATGGATCCAAAACCACTTAGAATTTTTAATCCATATACCCAAGCAAAAAAATTCGATCCTATTTGCGAATATATTAAATATTGGATTCCTGAATTATCTAAAGTGTCTAATTCAGAATTATTAAATGGGGAAATATCTA…	558
373021	HF_READ_05373021	0	0	0	0	0.6	0.6	0.4	0	0	0	0	0	1.8	0.6	4.6	1.2	0.2	0	0.4	0	0.2	0.4	1	2.6	0.6	0	0	0.2	0	0.2	15.6	7	NA	0.0110687	14.2977	Prochlorococcus marinus str. MIT 9301	97.44	555	phrB	similar to DNA photolyase	Replication and Repair	Environmental	AAATGTCATTTTTATTAAAAGCTCAAAATACCTGGGAAAATTTTGCGAAATACAAAATCAATGATTATGAAAAATTAAGAAATTTTGATTTTGGGCCAAATAACGAAAGTTCAGTTTCAAAATTATCGCCTTTCATTACTCATAGAATATTATCGGAATATGATCTGATCCATGACATTAAAAGTAAGTACAAAATCAAAAATTCAACTAAATTTATTGAAGAAATATTTTGGAGAGTTTATTGGAAAGGGTGGATGGAAAATAGACCTAAAGTTTGGAGAAATTTTATTTCAGAAAACAATCTTGATTTTGGGGGATCCTCTAGAGTCGACCTGCAGGCATGCAAGCTGCACCGCAGCGATTCCCA	367
842715	HF_READ_04842715	0.67	0	0	0	0	0.33	0.5	0	0	0.83	0.17	0	0	0.5	0.33	0.67	0.33	0.17	1.5	0.67	0.33	0.17	0.5	0.83	0.83	0	1.67	0.67	0.5	0.33	12.5	0	NA	0.305962	7.58826	Prochlorococcus marinus str. MIT 9301	97.55	678	phrB	putative DNA photolyase	Replication and Repair	Environmental	GCCTTACTTTAAAGAGTCAAAAGCAGGAATGGCCTAGCCAAAATTATCGAAGAATTCTACAATTTCAGTTTAGAGAATTAGATAGAATAATTGTCTAAAGTGGCAGAAATCCGAAAAACTTACTTAAAGCTCATAAAATTATTCTATTAACTTTAATGTGGAGAATTACCCTCAGAACGAAATTTTACCTTTAAAAAAAGAAACTGTCCAGAAGAATGCAAGGTGGCAGAAAGAAAGGTTTAGAAGAGAATGCAATACTTCTTTAGTAATAAATTAGATTCTTATTCAAAAGATATATCTAGCCCAGAAAAATCATTTGATAGTTGTTCAAGACTATCCCCATATATTTGTTGGGGATGCATTTCATTAAAAGAAATTTTTAAAAAGGCAAATATATTA…	928
948175	HF_READ_04948175	0	0	0	0	0	0.5	0	0	0	0	0.25	0	0.25	0.75	2.25	1	0.25	1.75	0.25	0	0.75	0	0.75	0	0	0.25	0	0.25	0.75	0	10	0	NA	0.434436	6.34319	Prochlorococcus marinus str. MIT 9215	91.94	809	phrB	putative DNA photolyase	Replication and Repair	Environmental	TCCACAATTGGGGTGATTGGTCGCGAGGGCGGGCGGCGAGTCGTGGAGGGCGGGGGGGCGGATGCGGGGCGGCGGCGCGGGGGCGGCGGGAAAAGGATGGGCCAGAAGGTAAAATCATCCAGGGGATTAATTAAAGGCCCATTAAAAATTAATCTAATTGATTTTGATGCTGGGGAAATACCCGACGAAAAAATATTTTCTTTTAAAAAAGATGAATGTAAAGGAAGATTAAAAGGAGGAAGAAAAAAAGGCCTTGAAAGGATGGAATATTTTTTTAAAGAAAAATTAAATTCATATTCAAAAGATATTTCAAGCCCAGAAAAATCTTTTGATAGCTGCTCAAGATTATCTCCTTATATTAGTTGGGGATGTCTTTCATTGAAAGAGATTTTTTATCAA…	913
554231	CAM_READ_0234554231	0.25	0	0.5	0	0	0	0.25	0	0	0.25	0.25	0	0	0.75	1	0.5	0.5	0.25	0.25	0.25	0.5	0.25	0.25	0.75	0.5	0	0.5	0.25	0	1	9	0	NA	NA	NA	Prochlorococcus marinus MED4	96.58	543	phrB	putative DNA photolyase	Replication and Repair	Environmental	ATTTATCAAAAATATCAAATTTCCTGGTTCGAATATTTGTCCATGTAGACCTGGAGAGAATGCTGCAGAAACATTATTAGAAAACTTCATTAACGAAAAAAATAATATTCTTATAATTCTGCAAGAGATTTTCCTTCTCATAATGGGACATCATTTCTAAGTGCATCTCTCAGATTTGGCACCATCAGCATTAGAAAAGTTTGGAACGCCACATTAAATTTACATTCAGATTTTGCATATCAAGAAAATTACCTATCAATTGAAACTTGGCAAAAAGAACTTGTTTGGCGTGAATTTTATCAACACTGCTTATTCCATTTCCCTAGAGCTAGAGAAAGGTCCATATAGAAAAAAATAGGGATCACTTTCCATGGCAAAAACCAAATAAATTAGGAAATA…	430
891795	HF_READ_04891795	0	0	0.25	0	0.25	0.5	0.25	0	0	0	0	0	0	0.75	2	1.75	0.5	0.25	0	0	0	0.25	0	1	0.75	0	0	0.5	0	0	9	0	NA	NA	NA	Prochlorococcus marinus str. AS9601	95.68	916	phrB	similar to DNA photolyase	Replication and Repair	Environmental	GCAGTGCCAGCTTGCATGCCTGCAGGTCGACTCTAGAGGATCCCCTCTTTTTGATGGAGATGCTTCATCTAATCTCCTTAGCTGGAGATGGGTCGGAGGATTGCAAACGAAGGGAAAACAATATCTTTTTTCATCATCAAACCTCAGAAAGTTTTCAAATAATAGATTTAATGTAGAAAAAATAAGTAATCAACAAATTTTTCTTGAAGAATCTAATCAAATACCATTTGAAGATGAGATTTATAAAAATGATATGGATCCTAAATCAGATAATCTGATTATGTTTGAAAATGATCTGCACCTTGCAACCCTTAAAAATTTACTTCCAAGCTATAAAAAAGTATTTATCATCCTTTTAAAAAATGAACAAAGACAAATTAAATTGTCTGAATCTGTTTT…	704
2901	PMED4_02901	0.2	0	0	0	0	0.4	0.2	0	0	0	0	0	0.6	0.4	0.8	0.6	0	0.4	0.2	1.2	0	0.4	0.6	0.4	0.6	0	0.4	0.4	0	0.6	8.4	0	NA	NA	NA	Prochlorococcus marinus MED4	100	2629	phrB	putative DNA photolyase	Replication and Repair	Genomic	ATGAATAAACCTAGAATACTTTTTTGGCATAGAAAGGATTTAAGAATATTTGATAATCAAGCTTTAATCAAAGCATTTTCATTATCAGATGCTATTACTTCAACTTATATATTTGATAAAAATTACTCACACGATTTCAATGCAAGTTCAAGAGCTTGGTTTCTAGGAAATTCGCTTCAAGAATTAGGAAATAATTGGAAAAAAATGGGTAGTAGATTAGTTTTGGAAGAAGGAGATCCGGTATTAATAATTCCTCAATTAGCAAAGAAAATAGATGCTAAATTTGTTTTTTGGAATAGATCAATTGAACCTTATGAGATTAATCGAGATTTAGAAATAAAAAATAATTTAAAAGAACAAAATATTCAAGTTATTGAAACTTGGGATCACTTATTAATA…	1437
299620	JCVI_READ_1103359299620	0.2	0	0.2	0	0.2	0.4	0.2	0	0	0	0	0	0.2	0.8	1.4	0.2	0.4	0.2	0.8	0.4	0	0.4	0.4	0.8	0	0	0.2	0	0.4	0.6	8.4	0	NA	NA	NA	Prochlorococcus marinus str. MIT 9301	97.82	1358	phrB	putative DNA photolyase	Replication and Repair	Environmental	AGATCCGTTATATAATCTCCAATAGCAAGGAAATAGGTGTTAATTGTTTTTGGAAAAACAATGACCTATGAGATGATCGCGATTAAAATAAAAAAAATTAAAAAAAAAAATATCAAGTATGATCTGGGATACTTATTAGTGGACGTCAAAAATATTTCAGGGAATAATAAACTTATCAGTTATGGGCTTTTATAAAACCTAAATCAAAAATGAATTTATTAGGTTCATATGACCAAGATAAAGTTATTTTCCAGTTTAAAGATATAGATAATAAACTCAAAGAAAATAAGACAATAAATTCATCTGATTCGGTTTTAGAGAAATTTATCAAAAATATCAAATTTCCTGGTTCGAATATTTGTCCATGTAGACCTGGAGAGAATGCTGCAGAAACATTAT…	1038
965059	HF_READ_04965059	0	0.33	0	0	0	0.33	0	0	0	0	0	0	0.33	1	2	1	0.33	0	0	0	0	0	0	1	0.33	0.33	0	0.33	0.67	0.33	8.31	0	NA	NA	NA	Prochlorococcus marinus str. MIT 9301	94.41	1154	phrB	similar to DNA photolyase	Replication and Repair	Environmental	AAATGTCATTTTTATTAAAGCTCAAATACTGGGAAAATTTTGCTAAATACAAAATTAATGATTATGCAAAATTAAGAAATTTTGATTTTGGGCCAAATAACGAAAGTTCAGTTTCAAAATTATCTCCTTTCATTACTCATAGAATATTATCGGAATATGATCTGATTCATGATATTAAAATTAAGTACAAAATCAAAAATTCAACTAAATTTGTTGAAGAGATATTTTGGAGAGTTTACTGGAAAGGGTGGATGGAAAATAGACCTAAAGTTTGGCGAAATTTTATTTCAGATAACAATCTTGATTTTGATTATGAGCTATATGAAAGAGCAATTAATGGCAATACAGAAATAGATTTTTTTAATTCTTGGGTCCATGAATTAAAGCACTACAACTATT…	838
785621	HF_READ_04785621	0.4	0.2	0.2	0	0	0.8	0	0	0	0	0.2	0	0	0.2	2.2	0.8	0.6	0.4	0.2	0	0.2	0	0.8	0.4	0	0	0.2	0.2	0	0	8	0	NA	NA	NA	Prochlorococcus marinus str. MIT 9215	90.64	894	phrB	putative DNA photolyase	Replication and Repair	Environmental	ACAGTGCCAAGCTTGCATGCCTGCAGGTCGACTCTAGAGGATCCCCTTTTTTAAAGAAAAATTAAATTCATATTCAAAAGATATTTCAAGCCCAGAAAAATCTTTTGATAGTTGCTCAAGATTATCTCCTTACATTAGTTGGGGATGTCTTTCCTTGAAAGAGATTTTTTATCAAGCAAATTTATATAAAAATAATAATTCAAGAATGTTGAAGAGTAGATTAACTTGGCATTGTCATTTTATTCAGAAACTTGAAAGCGAACCAGAATTAGAATTCCAAGATTTCCACCCTTATTTTCAAAATATTAGAACTAATAAAACTGAATTACTTGTTTTATGGAGTCAAGGCAATACTGGTTTTCCTTTTATAGATGCTTGTATGCGTTCATTAAACTTTAA…	911
89387	JCVI_READ_1092344089387	0	0	0	0	0	1	0.25	0	0	0.5	0	0	0.25	0.25	1.5	0.5	1	0	0.25	0	0	0	0.25	1.75	0.25	0	0.25	0	0	0	8	0	NA	NA	NA	Prochlorococcus marinus str. MIT 9301	97.49	995	phrB	putative DNA photolyase	Replication and Repair	Environmental	GTTGGGCTTGGCAGGCATATTGGTCTAAAAGTGGCAAGAAAATTCCGAAAAAAACTTACTTAAAGCTCCATTAAGAATTAATTCTATTAACTTTAATATTGGAGAAATACCTTCAGACGAAATTTTTAACTTTAAAAAAGAAACTTGTCCAGGGAGAATGCAAGGTGGAAGAAAGAAAGGTTTAGAGAGAATGCAATACTTCTTTAGTAATAAATTAGATTCTTATTCAAAAGATATATCTAGCCCAGAAAAATCATTTGATAGTTGTACAAGACTATCCCCATACATTAGTTGGGGATGCATTTCATTAAAAGAAATTTTTAAAAAGACAAATATATCAAAAAACAATAATTCCAGGATGTTAAAAAGCAGATTAACTTGGCATTGTCATTTTATTCA…	1105
576866	HF_READ_05576866	0	0	0	0.2	0	0.6	0.2	0	0	0.2	0.6	0	0.2	0.6	0.8	0.4	0.2	0.6	0.4	0.4	0	0	0.6	0.6	0	0	0.2	0.2	0	0.8	7.8	0	NA	NA	NA	Prochlorococcus marinus str. MIT 9301	95.55	1261	phrB	putative DNA photolyase	Replication and Repair	Environmental	GAGGTCCAAGGCTTGCATGCCTGCAGGTCGACTCTAGAGGATCCCCCTGCAGAAACATTATTAGAGAACTTCATTAACGAAAAAAAAATATATTCTTATAATTCTGCAAGAGATTTTCCTTCCCATAATGGGACATCATTTCTAAGTGCATCTCTCAGATTCGGCACCATCAGCATTAGAAAAGTTTGGAACGCCACATTAAATTTAAATTCAGATTTTGCAAATCAAGAAAATAATCTATCAATTGAAACTTGGCAAAAAGAACTTATTTGGCGTGAATTTTATCAACATTGCTTATACCATTTCCCAGAGCTAGAAAAAGGCCCATATAGAAAAAAATGGGATCACTTCCAATGGCAAAACAATAATGAGTGGTTTCAACATTGGAGCAACGGAGAG…	957
582058	HF_READ_05582058	0	0	0	0	0	0.75	0.25	0	0	0	0	0.5	0	0	2	0.5	0.5	0	1.25	0.5	1	0	0	0	0.5	0	0	0	0	0	7.75	0	NA	NA	NA	Prochlorococcus marinus str. AS9601	95.2	668	phrB	similar to DNA photolyase	Replication and Repair	Environmental	TAACCGGGGCCAAGCTTGCATGCCTGCAGGTCGACTCTAGAGGATCCCCAAAATGATCTGCACCTTGCAACCCTTAAAAATTTACTTCCAAGCTATAAAAAAGTATTTATTATCCTTTTAAATAATGAACAAAGACAAATTAAATTGTCTGAATCTGTTTTGAAATTTAAAAAAGATTTGGTCTCTGAATTTGTAGAGCAATTTGATAATGTTGAACAGATTGATCCATATTCACTGGAAATTACTTTTAAAAATACTAACGAAATAGACATTATTTACCCTGGAGTGGGAGAAAATTATGATTTCATAACTGAGTTTAAAAATTTACACCATAAAAGAATTTTTAATCTTGTGAGGGATGAAGATTTATTTTCTTGGAAATTTGCCAAAAAAGGGTTT…	466
116586	HF_READ_05116586	0	0	0	0	0	0.25	0	0	0	0	0	0.5	0.75	0	1.5	0.75	0.25	0	0	0.25	0.25	0.25	0	0.75	0.5	0.5	0	0.25	0	0.25	7	0	NA	NA	NA	Prochlorococcus marinus str. AS9601	94.06	1092	phrB	similar to DNA photolyase	Replication and Repair	Environmental	AGCCAGTGCCAAGCTTGCATGCCTGCAGGTCGACTCTAGAGGATCCCCAAAGGGTGGATGGAAAATAGACCTAAAGTTTGGAGAAATTTTATTTCAAAAGAAAATTTCGATTTTGATTATGACCTATATGAAAGTGCAATTAATGGCAATACAGAATTAGATTTTTTTAATTCTTGGGTCAATGAATTAAAGCAGTACAACTATTTGCATAACCATACAAGAATGTGGTTTGCGAGTACTTGGATATTTAATTTAGGCCTTCCATGGCAATTGGGAGCAAAGTTTTTCTTTAAATATCTTTTTGATGGTGATGCTGCATCTAATCTCCTTAGCTGGAGATGGGTCGGAGGATTACAAACGAAGGGTAAACAATATCTTTTTTCATCATCAAACCTCAAA…	846
749346	HOT_READ_85749346	0	0	0.17	0	0.5	0.17	0.17	0	0.17	0	0.17	0	0.17	0.33	0.33	0.33	0.33	0	0.33	0	0.33	0.17	0.5	0.5	0.5	0.33	0.17	0.17	0.17	0	6.01	0	NA	NA	NA	Prochlorococcus marinus str. MIT 9301	96.65	1277	phrB	putative DNA photolyase	Replication and Repair	Environmental	CATAACCTGGGAAAAAAAAATGGGGTTAGGTAGGGTTTATGTTATGAGAAAAGGAAGGGAGGATTCCAGGTATTTAAATAATTTCCCTCCAATTAAGCAAAAGAAAAATAGGATTGCTAAAATTTTGTTTTTTGGGGAATTAGATCCAAATGAACCCTTATGGAGGATTAAATCGCGGATTTACCAATTAAAAAAAAATTTTAAAAAGAACCAGAATATTTCAAGTTTATTGAAACTTGGGGATCACTTATAAATAGACCCTTTAAAAAATATTTTCGGGAAATAATAAACCTTATTCAGTTTATGGGCCTTTTTATAAAAACCTTAAATCAAAAATGAATTTATTAGGTCCATATGACCAAGATAAAGTTGTTTTCCAGTTTAAAGATATAGATAATA…	1008
109002	HF_READ_05109002	0	0	0	0	0.4	0.8	0.6	0	0	0	0	0.4	0.6	0.8	5.8	3	0.6	0.4	0	0	0.2	0	0.4	1.2	1.8	0.6	0.4	0.8	0.2	0	19	4	Yes	0.011	14.3095	Prochlorococcus marinus str. MIT 9301	94.76	1253	phrB	similar to DNA photolyase	Replication and Repair	Environmental	GCAGTGCAGCGTTGCATGCCTGCAGGTCGACTCTAGAGGATCCCCTATTAAGAGTAAGTACAAAATCAAAAATTCAACCAAATTTGTTGAAGAAATATTTTGGAGAGTTTATTGGAAAGGGTGGATGGAAAATAGACCTAAAGTTTGGCGAAATTTTATTTCAGAAAACAATCTTAATTTTGATTATGAGCTATATGAAAGTGCAATTAATGGCAATACAGAAATAGATTTTTTTAATTCTTGGGTCCATGAATTAAAGCAGTACAACTATTTGCATAACCATACAAGAATGTGGTTTGCGAGTACATGGATATTTAATTTAGGTCTCCCATGGCAATTGGGAGCAAAGTTTTTCTTCAAATATCTTTTTGATGGTGATGCTGCATCTAATCTCCTTAG…	942
15621	A9601_15621	0	0	0	0	0.2	0.4	0.2	0	0	0.2	0	0.2	0.4	0.8	4	3.4	0.6	0.2	0.4	0.6	0.4	0	0.4	1	1.4	0.4	0.6	0.4	0	0.2	16.4	4	Yes	0.02495	13.0517	Prochlorococcus marinus str. AS9601	100	2099	phrB	similar to DNA photolyase	Replication and Repair	Genomic	ATGTCATTTTTATTAAAAGCACAAAATACCTGGGAAAATTTTGCGAAATACAAAATTAATGATTATGCAAAATTAAGAAATTTTGATTTTGGGCCAAATAACGAAAGTTCAGTTTCAAAATTATCGCCTTTCATTACTCATAGAATATTATCGGAATATGATCTGATCCATGATATTAAAAGTAAGTACAAAATCAAAAATTCAACTAAATTTGTTGAAGAAATATTTTGGAGAGTTTACTGGAAAGGGTGGATGGAAAATAGACCTAAAGTTTGGAGAAATTTTATTTCAGAAAATAATCTCGATTTTGATTATGAGCTATATGAAAATGCAATTAATGGCAATACAGAATTAGATTTTTTTAATTCTTGGGTTCATGAATTAAAGCAGTACAACTAT…	1155
891896	HF_READ_04891896	0	0	0.33	0	0.33	0.67	0	0	0	0	0	0	0.33	1	1.67	0.67	0.33	1.33	0.33	0	0	0.67	0.33	1.33	0.33	0	0.67	0	0	0.33	10.65	4	Yes	0.0597266	11.7003	Prochlorococcus marinus str. AS9601	96.52	934	phrB	putative DNA photolyase	Replication and Repair	Environmental	TCATGAATAAACCTAGAATACTTTTTTGGCATAGAAAGGATTTAAGAATATTTGATAATCAAGCTTTAATCAAAGCATTTTCATTATCAAATGCTATTACTTCAACTTATATATTTGATAAAAATTACTCACACGATTTCAATGCGAGTTCAAGAGCTTGGTTTCTAGGAAATTCACTACAAGAATTAGGAAATAATTGGAAAAAAATGGGTAGTAGATTAGTTATAGGAGAAGGAGATCCAGTATTAATAATTCCTCAATTAGCAAAGAAAATAGATGCTAAATTTGTTTTTTGGAATAGATTAATTGAACCTTATGAGATTAATCGCGATTTACAAATAAAAAAAAATTTAAAAGAACAAAATATTCAAGTTATTGAAACTTGGGATCACTTATTAG…	651
591385	JCVI_READ_1103769591385	0	0.67	0	0.33	0	0	0	0	0.33	0	0	0.67	0	1	3.33	0.67	0	0.33	0.67	1	0	0	0.67	3	0.33	0	0.33	0.67	0	0.33	14.33	0	NA	0.450713	6.20882	Prochlorococcus marinus str. MIT 9312	94.85	1277	pip	proline iminopeptidase	Amino Acid Metabolism	Environmental	TCAAGTCTGTTCCGAAATCAGTACGTGAAAGGGTTTTTACAGTAGTGATATCATACTATTTATGGGAAGATCTGGTAATCCAATGGAAAAAAATACTGGTATTCATGGAGTCCAGGAGGAGGAAGTCAACCAAGATACAGAAGATACTTTAATCCAGATAAATTCGATATTATTCAATTTGACCAAAGAGGTTGTGGTTCTTCAACTCCTTTCTCCGAATTAAGAGATAATACTACTAATCATTTAGTTGATGATATTGAGAAATTAAGGATTTTACTAAAAATTGATAGTTGGCATTTGTTTGGCGGATCTTGGGGCTCAACGCTTTCACTTATATATGCAATTAAAAATCCCTCAAGAGTTATGAGTTTAACTTTGCGAGGAATATTTTTGTGTAGA…	931
232532	JCVI_READ_1104230232532	0	6	2.25	1	2.75	2.75	0.5	0.75	0.75	1	2.25	2.25	0.5	3.75	12.75	6.25	0.75	0.75	3.75	6.75	4.75	3	8.75	11.5	4.5	0	1.5	1.25	1	2.75	96.5	7	Yes	0.0727675	11.3373	Prochlorococcus marinus str. MIT 9301	95.8	507	pip	proline iminopeptidase	Amino Acid Metabolism	Environmental	CAATGAAAGATCAAGTCTTGTTTCCTAAAATTGAAGTTCGTGAAAAGGGGTTTTTACAAGTTAGTGATATTCATAAGATTTATTGGGAAAGATCTGGTAATCCAAATGGTAAAAAAATACTAGTTATTCACGGAGGCCCAGGAGGAGGAAGTCAACCAAGATATAGAAGATACTTTGATCCAGATAAATTCGATATTATTCAATTTGACCAAAGGGGTTGCGGTTCTTCGACTCCTTTTTCAGAATTAAAAGAAAATACGACTAATCATTTAGTTGATGATATTGAGAAATTAAGGATTCTATTAAAAATAGATAGTTGGCATTTATTTGGTGATTCTGGGTCTGATTATTGCTAC	356
58958	HF_READ_05058958	0	4.83	1.67	0.5	1.67	1.33	0.17	0.33	0.5	0.5	1.5	1.33	0.83	2.33	8.67	4.33	0.33	0.33	3	5	3	2.17	6.5	10.33	2.83	0.17	1	0.67	0.33	2	68.15	7	Yes	0.0789007	11.1454	Prochlorococcus marinus str. MIT 9301	93.35	502	pip	proline iminopeptidase	Amino Acid Metabolism	Environmental	CAATGAAAGATCAAGTTTTGTTTCCTAAAATTGAAGTTCGTGAAAAGGGTTTTTTCCCCGTAAGTGATATTCATAAGATCCCCCCCGGAAAGATCTGGCAATCCAAATGGTAAAAAAATACTAGTTATTCATGGAGGCCCAGGAGGAGGAAGTCAACCAAGATATAGAAGATACTTTGATCCAGATAAATTCGATATTATTCAATTTGACCAAAGGGGTTGCGGTTCTTCAACTCCTTTCTCAGAATTAAAAGAAAATACATCTAATCATTTAGTTGATGATATTGAGAAATTAAGGATTCTTTTAAAAATAGATAGTTGGCATTTATTTGGTGGATCTTGGGGCTCAACACTTCACTTATATACGCAATAAAAAGGATAAAGATT	386
861318	HF_READ_04861318	0	2.8	1	0.6	1	0.6	0	0	0	0.4	0.8	0.4	0.8	1.4	6.4	3.6	0.6	0.6	2.2	3.2	3.2	1	3.8	6	1.4	0.4	0.6	0.8	0.4	1.6	45.6	7	Yes	0.0753069	11.2388	Prochlorococcus marinus str. MIT 9301	97.35	1362	pip	proline iminopeptidase	Amino Acid Metabolism	Environmental	CAATGAAAGATCAAGTCTTGTTTCCTAAAATTGAAGTTCGTGAAAAGGGTTTTTTACAAGTAAGTGATATTCATACGATTTATTGGGAAAGATCAGGCAATCCAAATGGTAAAAAAATACTAGTTATTCATGGAGGCCCAGGAGGAGGAAGTCAACCAAGATATAGAAGATACTTTGATCCAGATAAATTCGATATTATTCAATTTGACCAAAGAGGTTGCGGTTCTTCAACTCCTTTCTCAGAATTAAAAGAAAATTCGACTAATCATTTAGTTGATGATATTGAGAAATTAAGGATTCTATTGAAAATCGATAGTTGGCATTTGTTTGGTGGATCTTGGGGCTCAACACTTTCACTTATATATGCAATTAAAAATCCCTCAAGAGTTATAAGCTTAA…	850
102099	JCVI_READ_1103359102099	0	0.25	0	0	0.25	2.25	0.25	0.25	0.25	0.25	0.25	0.25	0.5	2.75	3.25	1	1.75	1.75	0.75	0.75	1	0.5	1.5	5.25	1.25	0	0.25	0.5	0.5	1.75	29.25	7	Yes	0.0388312	12.3704	Prochlorococcus marinus str. MIT 9301	96.43	523	pip	proline iminopeptidase	Amino Acid Metabolism	Environmental	GGGGCCCCCGGCAAGGCTGAGTCTCTCACACGTCATTTAATAAATAAAAAATTTAACTTTGATAATTCTGAAGTTAATTCTTTTTCAGATGCATTTGCAAGGATCGAATGTCATTATTTTATCAATAATATTTTCTTAGAAGATGATTTTATTTTGAAAAATATAAAAACAATAGAATCGATTCCAACAAAAATAATTCAAGGTAGGTATGACGTTGTGTGTCCTGTTAGGAGCGCTTGGGATCTAAATAAGAAATTAAAGAATTCTGAATTAATTATTGTTAATGATGCTGGTCATTCAATGAGTGAAAAGGGCATTACTAAAGAATTAATAAAAGCTGTGCAAGAACTTTAAAAGA	358
996700	HF_READ_04996700	0	1.33	0.5	0.67	0.67	1.17	0	0.17	0.17	0.17	0.5	0.5	0.5	0.83	4	1.67	0.67	0.5	1.5	1.67	2.5	0.67	2.33	3.83	0.5	0.33	0.33	0.5	0.33	0.33	28.84	7	Yes	0.0311818	12.6819	Prochlorococcus marinus str. MIT 9301	95.09	916	pip	proline iminopeptidase	Amino Acid Metabolism	Environmental	CCCATGAAAAATCAGTTCTGTTTCCTAAAAATTAAATTTCGGGAAAAGGGTTCCTTAAAGGTAAGTGAATATTCATTCGAATTTATTGGGAAAGATCAGGCCAATTCAAATGGTAAAAAAATACTAGTTATTCATGGAGGCCCAGGGTGGAGGGAAGTCAACCAAGATATAGAAGATACTTTGATCCAGATAAATTCGATATTATTCAATTTGACCAAAGAGGTTGCGGTTCTTCAACTCCTTTCTCAGAATTAAAAGAAAATTCGACTAATCATTTAGTTGATGATATTGAAAAATTAAGGATCCTTTTAAAGATAGATAGTTGGCATTTGTTTGGTGGATCTTGGGGCTCAACACTTTCACTTATATATGCAATTAAAAATCCCTCAAGAGTTATAA…	699
631448	JCVI_READ_1631448	0	0.5	0.25	0.5	0	0.5	0.25	0.25	0.75	0.25	0.5	0	0.75	0.5	2.5	3	0.25	0.5	0.75	0.25	1	1	1.5	4	0.75	0.5	0.25	0.25	0.25	1	22.75	7	Yes	0.0975394	10.6415	Prochlorococcus marinus str. AS9601	92.96	854	pip	proline iminopeptidase	Amino Acid Metabolism	Environmental	GGGTGTGAGTGATGATTTGAGAATTAAGGATTCTTTTAAAATAGATAGTTGGCATTTGTTTGGTGGATCTTGTGGGCTCAACACTTTCACTTATATATGCGATTAAAAATCCCTCAAGAGTTATTAGCTTAACTTTGCGAGGAATATTTTTATGTAGAAAGTTTGAATTGTTATGGTTCTATCAATATGGTGCAAGTGAGATATTCCCCGATGGATTTGAAGAATATATTTCTGTAATACCAAAAGAAGAAAGAAATGATTTAATAAGTTCTTTTTATAAATATTTAACATCTTCAGATGCGAATCTTAGATCAAAAGCAGCAGCAGCTTGGACAAAATGGGAGCTCTCAACAAGTCATTTAATAAATAAAAAATTTGATTTTGACAAGTCTGAAGTTA…	681
836728	HF_READ_04836728	0	0	0	0.2	0.2	0.2	0.4	0	0.6	0	0.6	0.2	0.2	0.6	3	2	0	0.4	1.8	0.4	0.8	0.6	2.6	2.8	0.4	0.6	0.2	0	0	0.4	19.2	7	Yes	0.124556	10.122	Prochlorococcus marinus str. AS9601	95.58	1106	pip	proline iminopeptidase	Amino Acid Metabolism	Environmental	AAATGAAAGATCAAGTTTTGTTTCCGAAGATTGAAGTGCGTGAAAAGGGTTTTTTAGAGGTTAGTGATATTCATTCTATTTATTGGGAAAGATCTGGAAATCCAAATGGAAAAAAAATACTTGTTATTCATGGAGGTCCAGGCGGAGGAAGTCAACCAAGATATAGAAGATACTTTGATCCAGATGAATTCGATATTATTCAATTTGACCAAAGAGGATGCGGTTCCTCAACTCCTTTCTCCGAATTAAAAGATAATACGACTAATCATTTAGTTGATGATATTGAGAAATTAAGGATTCTTTTAAAAATAGATACTTGGCATTTGTTTGGAGGATCTTGGGGGTCAACACTTTCACTTATATATGCAATTAAATATCCCTCAAGAGTTATGAGCTTAA…	747
481171	JCVI_READ_481171	0	0	0	0	0.2	0.4	0.2	0.2	0.2	0.2	0.4	0	0.2	0.8	3.6	2.8	0.6	0.2	0.6	1	0.2	0.8	0.6	2.4	0.4	0.4	0.2	0	0	0.2	16.8	7	Yes	0.0274641	12.8997	Prochlorococcus marinus str. AS9601	94.66	1241	pip	proline iminopeptidase	Amino Acid Metabolism	Environmental	TGGAAAGATCAAGTCTTGTTTCCGAACCTTTTTTTACGAGAAAAGGGCTTTTTACAAGTAAGCGATATTCATACTATTTATTGGGAAAGATCTGGTAATCCAAATGGCAAAAAAATTCTTGTTATTCATGGAGGCCCAGGAGGAGGAAGTCAACCAAGATATAGAAGATACTTTGATCCAGATAAATTTGATATTATTCAATTTGACCAAAGAGGTTGCGGTTCTTCAACTCCCTTCTCCGAATTAAAAGAAAATACGACTAATCATTTAGTTGATGATATTGAGAAATTAAGGATTCTTTTAAAAATAGATAATTGGCATTTGTTTGGTGGGTCTTGGGGCTCAACACTTTCACTTATATATGCGATTAAAAATCCCTCAAGAGTTATCAGCTTAACT…	948
995011	HF_READ_04995011	0	0.4	0	0	0	1.4	0	0.2	0	0.4	0.6	0	0.2	1.4	1	0.6	1	0.8	0.2	0.4	1	0.2	0.8	2.4	0.6	0	0.2	0.8	0.2	0.6	15.4	7	Yes	0.201025	8.93472	Prochlorococcus marinus str. MIT 9301	95.99	498	pip	proline iminopeptidase	Amino Acid Metabolism	Environmental	GCAGGTGCCAGCTTGCATGCCTGCAGGTCGACTCTAGAGGATCCCCTGATAAGTCTCAAGTTAATTCTTTTTCAGATGCATTTGCAAGGATCGAATGTCATTATTTTATTAATAAAATTTTCTTAGAAGATGATTTTATTTTGAAAAATATAAAAACAATAGAATCGATTCCAACAAAAATAATTCAAGGAAGGTATGACGTTGTTTGTCCTGTTAGGAGCGCTTGGGATCTAAATAATAAATTAAAGAATTCTGAATTAATTATTGTTAATGATGCTGGTCATTCAATGAGTGAAAAGGGCATTACTAAAGAATTAATAAAAGCTGTAAAAGGAATTCAAAATC	345
930843	HF_READ_04930843	0.17	0.5	0	0	0	0	0.33	0.17	0	0	0.33	0.33	0	0.83	2.5	1.5	0.33	0	0.17	0.67	0.17	0.17	0.67	3.17	0.5	0.17	0	0	0	0.67	13.35	7	Yes	0.160806	9.51161	Prochlorococcus marinus str. AS9601	94.75	1104	pip	proline iminopeptidase	Amino Acid Metabolism	Environmental	ATTTAACAGACTGCGTGCACTTGCATGCCTGCAATCACTCTAGAGGATCCCCAATTAAAAGAAAATACGACTAATCATTTAGTTGATGACATTGAGAAATTAAGGATTCTATTAAAAATAGATAGCTGGCATTTATTTGGTGGATCTTGGGGCTCAACACTTTCACTCATATATGCAATTAAATATCCTTCAAGAGTTATGAGCTTAACTTTGCGAGGTATATTTTTATGTAGAAAGTTTGAATTATTATGGTTCTATCAATATGGTGCAAGTGAGATATTTCCTGATGAATTTGAAGAATATATTTCTGTAATACCAAAAGAAGAAAGAAATGATTTGATAAGTTCTTTTTATAAATATCTAACATCTTCAGATGCTAATCTTAGATCAAAAGCAGCA…	757
886490	HF_READ_04886490	7.17	2.67	3.33	0.67	0.33	0.5	2.67	1.67	5.17	6.5	5.67	1.67	0.33	0.5	1	2.67	7.33	20.33	22.17	4.67	5.17	2.67	2.17	2.33	3.83	4.17	24.17	14.17	4.5	11.33	171.53	3	NA	0.00417582	15.3043	Uncultured Prochlorococcus marinus clone ASNC612	97.64	642	pmm1148	possible EF-1 guanine nucleotide exchange domain	Unclassified	Environmental	GCAGTGCAAGCTTGCATGCCTGCAGGTCGACTCTAGAGGATCCCCGAAGACATTTAAATTGGGAATTTAAGCTGGCAGAAAATGATTCTGAACCTGATGAAGCTCTTGTTGAAGGAATTATTAATGCCACAGAAAGCTTTCTAAGGAGTAGTGAGGTTCATCGATTATTTATTCAAGAATTAGTTCAGGGCACATTCGAGGAAGCAAATGATAAAAAAATAATTTCTAAAGCAATAAAATCTATCATTGAAGAAGAAATTGTTAGTTCACTAAGAGAAAAGAAAGAAACTCTTTTAAAGAAAATATCCGCTAAATTAATATCAGAAGAAAAAGTTAGCGAGGAACTTGCAATAAATTCAGCCAAAGAGGGTTTTGAGGAAGTTGAAAGGCTACTTGCAA…	426
649430	JCVI_READ_1092963649430	1.5	1.5	1	0	0	0	0.5	0	4	4	2.5	1	0.5	1	0	1.5	2	11	6	2	1	0	0	0.5	0	2.5	9.5	3	0.5	3	60	3	NA	0.0333333	12.6136	Uncultured Prochlorococcus marinus clone ASNC612	95.22	428	pmm1148	possible EF-1 guanine nucleotide exchange domain	Unclassified	Environmental	AATTTGGTGGGTCGGGTTCGCTGAGAAGATTTATGAATGTCAGTTGATACTTATTCTCAGACAGTCATGCCAAGTCTACACTCTGCAGGTTGGCAAAGAAGACATTTAGATTGGGAATTTAAGCTAGCAGAAAACGGTTCTGAACCTGATGAAGCTCTTGTTGAAGGAATTATTAATGCCACAGAAAGCTTTCTAAGAAGTAGTGAGGTGCATCGATTATTTATTCAGGAATTAGTCCAGGGCACATTTGAGGAAGCTAATGACAAAAAAATAATTTCTAAAGCAATAAAATCTATCATTGAAGAAGAAATTGTTAGTTCACTAAGAGGAAAAAAAGAAACTCTATTAAAGAAAATATCCGCAAAATTAATATCAGAAGAAAAAGTTAGCGAGGAACTT…	478
491073	HF_READ_05491073	1.25	0	0	0	0	0	0	0.75	3	2	1.25	0	0	0.75	0	0	2.25	3.5	7	1.25	0	0	0.5	0	0.75	0	6.75	3	2	3.5	39.5	3	NA	0.00314286	15.6854	Uncultured Prochlorococcus marinus clone ASNC612	95.32	674	pmm1148	possible EF-1 guanine nucleotide exchange domain	Unclassified	Environmental	CAATGAGTATAAAAGCAATCGAATGTCCAGATGGAGTATGTCACAGTCATCATGGTGGTCATGCTGTTCCAAGGCAAGCTATGCAGAAAAATCTAGAAAAGCATGGTAAGGATTGGTGCGAAAAATTAGCAGAGAGAATTTATGAAATGTCGGTTGATACTTTTTCACAGACAGTCATGCCTAGTCTCCACTCAGCAGGTTGGCAAAGAAGACATTTAGATTGGGAATTTAAGCTCGCAGAAAATGATTCTGAACCTGATGAAGCTCTTGTTGAAGGAATTATTAATGCAACTGAAAGCTTTCTAAGAAGTAGTGAGGTGCATCGATTATTTATTCAGGAATTGGTTCAGGGCACATTTGAGGAAGCAAATAACAAAAAAATAATTTCTAAAGCAATAA…	496
121306	HF_READ_05121306	0.67	0.5	0.33	0.33	0	0	0.33	0	0.83	1.17	0.5	0.33	0	0.17	0.33	0.17	1.5	2.83	3.5	0.5	0.33	0.33	0.17	0.17	0.5	0.33	1.67	1.33	0.33	1.17	20.32	3	NA	0.0280465	12.8277	Uncultured Prochlorococcus marinus clone ASNC612	97.16	618	pmm1148	possible EF-1 guanine nucleotide exchange domain	Unclassified	Environmental	TAATGAGTATAAAAGCAATCGAATGTCCTGATGGAGTATGTCACAGTCATCACGGTGGTCATGCTGTTCCAAGGCAAGCTATGCAGAAAAACCTAGAAAAGCATGGTAAAGACTGGTGCGAGAAATTAGCAGAGAGAATTTATGAAATGTCAGTTGATACTTATTCACAGACAGTCATGCCCAGTCTCCACTCCTCAGGTTGGCAAAGAAGACATTTAGATTGGGAATTTAAGCTGGCAGAAAATGATTCTGAACCTGATGAAGCTCTTGTTGAGGGAATTATTAATGCCACAGAAAGCTTTTTAAGGAGTAGTGAGGTGCATCGATTATTTATTCAGGAATTAGTCCAGGGGGATCCTCTAGAGTCGACCTGCAGGCATGCAAGCTGCACTGCCGGCC…	401
572083	HF_READ_05572083	3	2.33	1	0.5	0.17	0.5	3	2.33	7	7.5	3.17	2	0.17	0.5	1.5	2.17	5.5	11.17	19.83	4.5	4	1.33	1.5	1.17	1.83	2.33	13.33	10.67	4	5.17	123.17	3	Yes	0	17.5051	Uncultured Prochlorococcus marinus clone ASNC612	96.3	779	pmm1148	possible EF-1 guanine nucleotide exchange domain	Unclassified	Environmental	CAATGAGTATAAAAGCAATCGAATGTCCTGATGGAGTATGTCACAGTCATCATGGTGGTCATGCTGTTCCAAGGCAAGCTATGCAGAAAAATCTAGAAAAGCATGGTAAAGACTGGTGCGAGAAATTAGCAGAGAGAATTTATGAAATGTCTGTTGATACTTATTCACAGACAGTCATGCCCAGTCTCCACTCGGCAGGTTGGCAAAGAAGACATTTAGATTGGGAATTTAAGCTGGCAGAAAATGATTCTGAACCTGATGAAGCTCTTGTTGAAGGAATTATCAATGCCACAGAAAGCTTCTTAAGAAGTAGTGAGGTGCATCGATTATTTATTCAAGAATTAGTCCAGGGCACATTTGAAGAAGCAAATGACAAAAAAATAATTTCTAAAGCAATAA…	542
659866	JCVI_READ_1103668659866	2.17	1.33	1.5	0.33	0.17	0	0.5	1	2.17	4	2.33	0.33	0	0.17	0.33	2	3.17	5.33	9.33	2.33	1.33	0.67	0.67	0.17	1.83	2.17	9.33	6.17	2.33	3.83	66.99	3	Yes	0	18.026	Uncultured Prochlorococcus marinus clone HOT0M-2B5	98.16	731	pmm1148	possible EF-1 guanine nucleotide exchange domain	Unclassified	Environmental	CCAATGAGTATAAAAGCATCGAATGTCCTGATGGAGTGTGCCACAGTCATCATGGTGGTCATGCTGTTCCAAGGCGAAGCTATGCAGAAAAATCTAGAAAAGCATGGTAAAGACTGGTGCGAGAAAATTAGCAGAGAGAATTTATGAAATGTCAGTTGATACTTATTCACAGACAGTCATGCCCAGTCTCCACTCGGCAGGTTGGCAAAGAAGACATTTAGATTGGGAATTTAAGCTGGCAGAAAATGATTCTGAACCTGATGAAGCTCTTGTTGAAGGAATCATTAATGCCACAGAAAGCTTTCTAAGGAGTAGTGAGGTTCATCGATTATTTATTCAAGAATTAGTTCAGGGCACATTCGAGGAAGCAAATGATAAAAAAATAATTTCTAAAGCAAT…	588
54114	HF_READ_05054114	2.25	1	1	0	0.25	0	0.5	0	2.75	4	2	1	0	0.5	0.5	1.25	2	5.5	4.75	2.5	0	0.5	1	1	1	1.75	6.75	6.25	0.75	2.75	53.5	3	Yes	0.00375	15.5011	Prochlorococcus marinus str. MIT 9301	98.81	595	pmm1148	possible EF-1 guanine nucleotide exchange domain	Unclassified	Environmental	TTGAGCTCCGGTACGAGCTATGCAGAAAACCTAGAAGCATGGTAAAGACTGGTGCGAGAAATTAGCAGAGAGAATTTATGAAATGTCAGTTGATACTTATTCACAGACAGTCATGCCCAGTCTCCACTCAGCAGGCTGGCAAAGAAGACATCTAGATTGGGAATTTAAGCTGGCAGAAAATGATTCTGAACCGGATGAAGCTCTTGTTGAAGGAATTATTAATGCAACAGAAAGCTTTCTAAGGAGTAGTGAGGTTCATCGATTATTTATTCAGGAATTAGTTCAGGGCACATTCGAGGAAGCAAATGACAAAAAAATAATTTCTAAAGCTATAAAATCTATAATTGAAGAAGAAATTGTAAGTTCACTAAGAGAAAAAAAAGAAACTCTTTTGAAGAA…	527
47370	HF_READ_05047370	1	1.2	0.8	0	0.2	0	0.4	0.6	2	3.2	1.2	0.4	0	0.2	0.4	2.2	3	3.8	4.8	1.8	1.4	0.2	0.2	0	1.2	1.4	6	4.6	1.6	2.6	46.4	3	Yes	0	17.817	Prochlorococcus marinus str. AS9601	94.14	684	pmm1148	possible EF-1 guanine nucleotide exchange domain	Unclassified	Environmental	TGAACTCGGGTACCCTTTAGAAACATGGTAAGACTGGTGCGAGAAATTAGCAGAGAGAATTTATGAAATGTCAGTTGATACTTATTCACAGACAGTCATGCCCAGTCTCCACTCGGCAGGTTGGCAAAGAAGACATTTAGATTGGGAATTTAAGCTGGCAGAAAATGATTCTGAACCTGATGAAGCTCTTGTTGAAGGAATAATCAATGCAACAGAAAGCTTTTTAAGGAGTAGTGAAGTGCATCGTTTGTTTATTCAGGAATTAGTTCAAGGAACATTTGAAGAAGCAAATGATAAAAAAATAATTTCTAAAGCAATAAAATCTATCATTGAAGAAGAAATTGTTAGCTCACTAAGAGAAAAGAAAGAAACTCTTTTGAAGAAAATATCCGCAAAATT…	509
97392	HF_READ_05097392	0.25	0.75	0	0	0	0	0	0.25	0.75	1.5	0.5	0.25	0	0	0	0.5	0.25	2.25	3.5	0.25	0.5	0.25	0	0	0.25	0.5	1.75	2	1	0.25	17.5	3	Yes	0.00364706	15.4516	Uncultured Prochlorococcus marinus clone ASNC612	94.88	585	pmm1148	possible EF-1 guanine nucleotide exchange domain	Unclassified	Environmental	CAATGAGTATAAAAGCAATCGAATGTCCTGATGGAGTATGTCACAGCCATCATGGTGGTCATGCTGTTCCAAGGCAAGCTATGCAGAAAAATTTGGAAAAGCATGGTAAAGACTGGTGCGAGAAATTAGCAGAGAGAATTTATGAGATGTCAGTTGATACTTATTCGCAGACAGTAATGCCTAGTCTCCACGCTGCAGGTTGGCAAAGAAGACATTTAGATTGGGAATTTAAGCTTGCAGAAAATGGTTCTGAACCTGATGAAGCTCTTGTTGAAGGAATTATTAATGCCACTGAAAGCTTTCTAAGAAGTAGTGAGGTGCATCGATTATTTATCCAGGAATTAGTCCAGGGCACATTTGAGGAAGCCAATGGGGGATCCTCTAGAGTCGACCTGCAGG…	419
950376	HF_READ_04950376	0	0.25	0	0.75	0.5	4.5	1.5	0	0.5	0.25	0.75	0.5	0.5	7.75	9.75	4.75	4.75	3	2.5	0	0.5	0.5	2.75	3.5	6	1.25	3.75	1	0.25	0.5	62.5	4	NA	0.00578431	15.0905	Prochlorococcus marinus str. MIT 9301	92.89	904	pmm1359	predicted membrane protein PMM1359	Membrane Transport	Environmental	AGAAAAGTGCGAGCTTGCATGCGTGCATGTCGACTCTAGAGGATCCCCCTTAGAGTTATAACTGGAACTGTTCTTATCCATCACGGTTATGAAAAATTAGCAAATATAGAAAATTTCGCTGATGCTTTCGTCAGACCTTTACATCTTCCATTCCCAATATTTTTATCATACATAGCGGCATTCTCTGAAATAGGCGGTAGTTGGCTACTAATTATTGGCTTAGCTACAAGATTCGGGGCTTTGGCAAATGTGGGAACAATTTCTGTCGCCATATACCATGCACTTATTACTTCAGGTTTTAATATTTTCTTACTAGAGCTTTTACTTCTATATTTCGCTTCAGCAACTTCAATTGCATTAACAGGTCCTGGTAATTTCTCCTTAGATGAAGTCATTATC…	709
829869	JCVI_READ_1103242829869	0	0.33	0.17	0.33	0.17	1.67	0.17	0	0.17	0.5	0.5	0.17	0	2.17	4.17	2	1	0.33	0.33	0.33	0.33	0.17	1.33	1	1.33	0.33	0.67	0.17	0.17	0.33	20.34	4	NA	0.019209	13.4821	Prochlorococcus marinus str. AS9601	93.47	718	pmm1359	predicted membrane protein PMM1359	Membrane Transport	Environmental	TAGTGCTTTCAACAATTCTTACCAAGTCGTTTAGCAAAGATACTGCTTTATTAATTCTTAGAGTTATAACTGGAACTGTTCTTATCCATCACGGTTATGAGAAATTAGCTAATATAGAAAATTTTGCTGATGCTTTTGTCAGACCATTACACCTTCCATTCCCTATATTTTTATCATACATAGCGGCATTCTCAGAAATAGGTGGTAGTTGGTTACTAATCATCGGCTTAGCTACAAGGTTCGGGGCTTTGGCAATTGTTGGAACAATTTCTGTTGCTATATACCATGCACTTGTTACTTCAGGGTTTAATATTTTCTTACTAGAGCTTTTACTTTTGTATTTCGCTTCAGCAACTTCAATTGCATTAACAGGTCCCGGTAATTTCTCCTTAGACGAAG…	527
864654	JCVI_READ_1099993864654	0.33	0.33	0.67	0	0.33	0	0	0	0	0.33	0	0	0.33	1.67	2.33	1	0	0.33	0	0	0.33	0	0	1	0	0	0	0.33	0	0	9.31	0	NA	NA	NA	Prochlorococcus marinus str. MIT 9301	94.92	839	pmm1359	predicted membrane protein PMM1359	Membrane Transport	Environmental	TTTATGTTTTTCAACCTAAATATACAATTTAGAAATATTTAAGGATTAATTTCAACTTTTTCCCATTTCTTAACCTTTTCCCAAAGATATCGTTTATGAACAGGCTGTTCTAATTTAAGAAGATCTACTGAATCGATTTCAAAATTTAGAACCACAAAATTTTCTGACTTGGGTAGATTGTTTAATATTTCATGATTGGATTGGACTCTTGGATTTATTTTCTCTCCAGGAGACCCCCAAAACCAAGAAGATTTTGATTTTTCTGATAATGAATCCCAATAATTTTTGTTATCAATTAATTCACTTATTTTTCCCTTAAATCTATATTGTGATTTGGATTTCAAAAAGAACCATAATACTTCTGAATTAGGGTTTGATTTTAAATGCCCAATTTTTTCA…	673
954819	HF_READ_04954819	0	0	0	0	0	1.33	0	0	0	0	0	0	0.67	0.33	1.67	0.67	0.33	0.67	0	0	0.33	0	0	0.67	1	0.33	0.67	0	0	0	8.67	0	NA	NA	NA	Prochlorococcus marinus str. AS9601	89.37	765	pmm1359	predicted membrane protein PMM1359	Membrane Transport	Environmental	TAGTGCTTTCAACAATTCTTACAAAGTCGTTTAGTAAAGATACTGCTTTATTAATTCTTAGAGTTATAACCGGAACTGTTCTTATTCATCACGGTTACGAGAAATTAGCAAATATAGAAAATTTTGCTGACGCTTTTGTCAGACCATTACATCTTCCATTCCCTATATTTTTATCATACGTAGCGGCGTTTTCAGAAATAGGTGGTAGTTGGTTACTAATTATCGGTTTAGCCACGAGATTCGGAGCTTTGGCAATTGTTGGAACAATTTCAGTCGCTATATATCATGCACTTGTTACTTCAGGATTTAATATTTTTTTACTAGAGCTTTTACTTTTGTATTTCGCTTCAGCAACTTCAATAGCTTTAACAGGCCCTGGTAATTTCTCCTTAGATGAAG…	717
795279	HF_READ_04795279	1	0	0	1.5	0	0	0.5	0.5	0.5	1	0.5	0.5	0	0.5	2	1.5	1.5	0.5	2.5	3	1	1.5	0.5	1.5	1	0	0.5	1	1	2	27.5	0	NA	0.637754	4.5741	Prochlorococcus marinus str. MIT 9312	93.01	517	phoH	Phosphate starvation-inducible protein	Unclassified	Environmental	CGCTGGGTCCCCGTTATAGATAAAGGCATTATTGAAGTTGCTCCTTTAGCATTTATGCGAGGTAGAACATTGGATAACTCTTTGGTTATTTTAGATGAAGCACAAAACACTTCTTGCTCTCAAATGAGAATGTTTTTAACCAGATTAGGTGAGAGATCAAAAATGGTTGTAAATGGAGATATTACTCAAATTGATTTAAAAAAAGATCAGGAAAGCGGCCTTATTGAAGCATCAAGAATTTTATCTGAAACTGAAGGTATAAAATTTTGTTATTTAACTGTTCAAGATGTAGTTCGTCATCCTTTAGTTCAGAAAATTATTGAGGCTTATCAATAACTCTATAACTCTGGAGATCCGTACCCTGAAATTTTAAAAATCAGTTAGAATAAAATCATATTT…	427
71096	JCVI_READ_1095454071096	0	0	0	0	0.6	0.4	0.2	0	0	0	0	0	0.2	0.6	1	1	0.4	0.6	0.4	0	0	0.2	0.4	1	0.2	0	0.6	0	0	0	7.8	0	NA	NA	NA	Prochlorococcus marinus str. AS9601	92.61	567	pmm1359	predicted membrane protein PMM1359	Membrane Transport	Environmental	TAGTGCTTTCAACAATTCTTACCAAGTCGTTTAGCAAAGATACTGCTTTATTAATTCTTAGAGTTATAACTGGGACTGTTCTTATTCATCACGGATATGAAAAATTAGCGAATATAGAAAATTTCGCTGATGCTTTTGTTAGGCCATTACATCTCCCATTTCCAATATTTTTGTCATACATAGCAGCATTCTCAGAAATAGGTGGTAGTTGGTTACTAATTATTGGTTTAGCTACCAGATTCGGAGCTTTGGCAATTGTTGGAACAATTTCTGTAGCTATATATCATGCACTTGTTACTTCAGGCTTTAATATTTTCTTACTAGAGCTTCTACTTTTGTATTTTGCTTCAGCTACTTCAATTGCATTAACTGGGCCTGGTAATTTCTCCTTAGATGAAG…	428
518204	JCVI_READ_1092963518204	0	0	0	0.33	0	0.33	0	0.17	0.17	0	0	0.17	0.17	1.5	1.67	0.5	0.33	0.67	0.17	0	0.17	0	0	0.83	0.17	0.33	0	0	0	0	7.68	0	NA	NA	NA	Prochlorococcus marinus str. MIT 9301	93.28	668	pmm1359	predicted membrane protein PMM1359	Membrane Transport	Environmental	TAGTGCTTTCAACAATTCTTACCAAGTCGTTTAGCAAAGATACTGCTTTATTAATTCTTAGAGTTATAACTGGAACTGTTCTTATTCATCATGGTTATGAAAAATTAGCGAATATAGAAAATTTCGCTGATGCTTTTGTCAGACCTTTACATCTTCCATTCCCTATATTTTTATCATACATAGCGGCGTTTTCAGAAATTGGTGGTAGTTGGTTACTAATTATCGGCTTAGCTACAAGATTCGGAGCTTTGGCAATCGTTGGAACAATTTCTGTTGCTATATATCATGCACTTGTTACTTCAGGTTTTAATATTTTCTTGCTAGAGCTATTACTTTTATATTTCGCTTCTGCAACTTCAATTGCTTTAACAGGTCCCGGTAATTTCTCCTTAGATGAAG…	515
878004	HF_READ_04878004	0	0	0	0.33	0	0.33	0	0	0.67	0	0	0	0	1.33	1.33	0.67	0.33	0	0	0	0	0	0	1.33	0.67	0.33	0	0	0	0	7.32	0	NA	NA	NA	Prochlorococcus marinus str. AS9601	88.26	585	pmm1359	predicted membrane protein PMM1359	Membrane Transport	Environmental	TGGCTCGGGTACCTAGAGTTATACCGGTACTGTTCTTATTCATCATGGGTATGAGAAATTAGCGAATATAGAAAATTTTGCTGATGCTTTCGTAAGACCTTTACACCTTCCTTTCCCAATATTTTTATCTTACATAGCAGCATTTTCAGAAATAGGTGGTAGTTGGTTACTCATTATTGGCTTAGCTACAAGATTCGGAGCTTTAGCAATTGTTGGAACAATTTCTGTAGCTATATATCATGCACTTGTTACTTCAGGTTTTAATATTTTCTTGTTAGAGCTTTTACTTTTATACTTTGCTTCTGCAACTTCAATTGCATTAACAGGACCTGGTAATTTCTCCCTAGATGAAGTTATAATAAGAATTTTGAAATCAGAAGATGAAGATGAAATTATACC…	671
902359	HF_READ_04902359	0	0	0	0	0	0.6	0.2	0	0	0	0	0	0.2	0.8	1	0.8	0.6	0.6	0.6	0	0	0	0	0.2	0.4	0	0.2	0.2	0	0	6.4	0	NA	NA	NA	Prochlorococcus marinus str. MIT 9301	93.68	656	pmm1359	predicted membrane protein PMM1359	Membrane Transport	Environmental	TAGTGCTTTCAACAATTCTTACCAAGTCGTTTAGCAAAGATACTGCTTTATTAATTCTTAGAGTTATTACTGGAACTGTTCTTATTCATCACGGTTACGAAAAATTAGCAAATATAGAAAATTTCGCTGATGCTTTCGTCAGACCTTTACATCTTCCATTCCCAATATTTTTATCATATATAGCGGCATTCTCTGAAATAGGCGGTAGTTGGTTACTAATTATTGGCTTAGCTACACGATTCGGGGCTTTGGCAATTGTGGGAACAATTTCTGTCGCCATATACCATGCACTTGTTACTTCAGGTTTTAATATTTTCTTACTAGAGCTTTTACTTTTATATTTCGCCTCAGCAACTTCAATTGCATTAACAGGTCCTGGTAATTTCTCTTTAGATGAAG…	492
1462	HF_READ_05001462	0	0	0	0	0.2	0.4	0	0	0.2	0	0	0	0.4	1.2	0.4	0.6	0.2	0.2	0	0	0	0.4	0.4	0.8	0.4	0	0	0	0	0	5.8	0	NA	NA	NA	Prochlorococcus marinus str. MIT 9301	93.69	634	pmm1359	predicted membrane protein PMM1359	Membrane Transport	Environmental	TAGTGCTTTCAACAATTCTTACCAAGTCGTTTAGCAAAGATACTGCTTTATTAATTCTTAGAGTTATAACTGGAACTGTCTTAATACATCACGGTTATGAGAAATTAGCAAACATTGAAAATTTCGCTGATGCTTTCGTTAGACCATTACATCTTCCATTCCCAATATTTTTGTCATACATAGCGGCATTCTCAGAAATAGGTGGAAGTTGGTTACTAATCATCGGGTTAGCTACAAGATTCGGAGCTTTGGCAATTGTTGGAACAATTTCTGTAGCCATATATCATGCACTTGTTACTTCTGGTTTTAATATTTTCTTACTAGAGCTTTTACTTTTGTATTTTGCTTCAGCTACTTCGATTGCATTAACAGGTCCCGGTAATTTCTCCTTAGATGAAG…	614
944596	HF_READ_04944596	0.4	0.4	0	0.6	0.2	2.4	0.4	0.6	0.4	0.8	0	0.2	0.8	6.8	4.8	3.6	2.4	2.2	1.4	0.2	0.4	0.6	3	2.2	2.4	1.6	2.2	0.6	0	0.2	41.8	4	Yes	0.0203279	13.3757	Prochlorococcus marinus str. AS9601	93.55	813	pmm1359	predicted membrane protein PMM1359	Membrane Transport	Environmental	TATAGTGCTTCACAATTCTTACCAAGTCGTTTAGTAAAGATACTGCTTTATTAATTCTAGAGTTATAACTGGAACTGTTCTTATTCATCACGGTTATGAGAAATTAGCAAATATAGAAAATTTCGCTGATGCTTTTGTCAGACCATTACATCTCCCATTCCCAATATTTTTATCATATGTAGCGGCATTCTCAGAAATAGGTGGTAGTTGGTTACTAATTATCGGCTTAGCTACAAGATTCGGAGCTTTGGCAATTGTTGGAACAATTTCTGTAGCTATATATCATGCACTTGTTACTTCAGGTTTTAATATTTTCTTACTAGAGCTTTTACTTTTATATTTCGCTTCAGCAACTTCAATTGCATTAACAGGGCCTGGTAATTTCTCTTTGGATGAAGT…	610
210576	JCVI_READ_1092955210576	0.5	0	0	0.25	0.25	2	1	1	0	0.75	0.25	0	0.5	7.25	5.25	4.75	1.25	2.5	1.25	0.25	0	0.75	1.75	2.5	1.75	1.75	1.5	0	0	0.25	39.25	4	Yes	0.0220856	13.2354	Prochlorococcus marinus str. MIT 9301	94.14	700	pmm1359	predicted membrane protein PMM1359	Membrane Transport	Environmental	TGGTGCTTTCAACAATTCTTACCAAGTCGTTTAGCAAAGATACTGCTTTATTAATTCTTAGAGTTATAACAGGAACTGTTCTTATTCATCACGGTTATGAAAAATTAGCAAATATAGAAAATTTTGCTGATGCTTTTGTAAGACCATTGCATCTTCCATTCCCAATATTTTTATCATATGTAGCAGCATTCTCAGAAATAGGTGGTAGTTGGTTGCTAATTATCGGCTTAGCTACAAGATTCGGAGCCTTGGCAATTGTTGGAACAATTTCTGTCGCTATATATCATGCACTTGTTACTTCAGGTTTTAATATTTTCTTACTAGAGCTTTTACTTTTGTATTTTGCTTCAGCAACTTCAATTGCATTAACTGGTCCTGGTAATTTTTCCTTAGATGAAG…	507
786228	HF_READ_04786228	0.6	0.4	0	0	0.2	3.6	1.2	0.8	0.2	0	0	0	0.2	7	4.4	5.8	3.4	2.2	1.6	0	0.2	0.2	1.4	2	1.2	1	0	0	0.4	0	38	4	Yes	0.0157862	13.7883	Prochlorococcus marinus str. MIT 9301	90.45	509	pmm1359	predicted membrane protein PMM1359	Membrane Transport	Environmental	GCAGGGCCAGCTTGCATGCCTGCAGGTCGACTCTAGAGGATCCCCTTTGGCAATTGTGGGAACAATTTCTGTCGCTATTTACCACGCACTTGTTACTTCAGGTTTTAATATTTTTTTACTAGAGCTTTTACTTTTGTATTTCGCTTCAGCAACTTCAATTGCATTAACAGGACCTGGTAATTTCTCCTTAGATGAAGTCATTATCAGAATTTTGAAATCAGAAGATGAAGAAGAAATAATTACTTCGCCAAAATCAAAGAATTCTAAGATAGAAGAAGCTGAAGAAGAATCAAATAAAGGCGGCTTATTTCAGTTTCTTCAAGCGAACATACTCTCAGATACTTCAAGCTAACTTTTTAGGATAAAGGTTATTTATTAGTTCTAACCTTTTTCTATAAC…	515
602704	HF_READ_05602704	0	1	1	1	0	0	1	0	0.5	2.5	0.5	1	1	1	0.5	1	0	1.5	2	1	2.5	0	0	1.5	0.5	1	1.5	1	1	1	26.5	0	NA	0.358967	7.07419	Prochlorococcus marinus str. MIT 9312	96.03	1138	gidA	Glucose inhibited division protein A	Replication and Repair	Environmental	GCGGTGCCAAGCTTGCATGCCTGCAGGTCGACTCTAGAGGATCCCCTTAGCGCCGGACAAATTAATGGGACTACTGGCTATGAAGAAGCAGCAGCACAAGGATTAGTTGCAGGAGTCAATGCGACAAGAAAACTAAACAAAAAAGACCCTATCGTCTTCACTAGAGAAAGCAGTTATATAGGAACAATGATTAATGATTTAATTACCAAAGATCTCAAAGAACCATACAGAGTTCTCACTAGTAGGAGTGAATATAGGTTAACTCTTAGAGGAGATAATGCGGATAGGAGATTAACACCACTAGGTTATCAAATAGGACTAATTAATAAGAAAAGATGGTCGGCCTATCAAGAAAAAATGAAACTCCTCGAGGAAGAAAAATTTAGATTAAATAACACT…	897
706923	JCVI_READ_1103180706923	0.2	0	0.2	0	0.6	1.2	2	0.4	0.4	0.2	0	0.2	0.6	5	4.6	2.2	2.8	2.6	1.4	0	0.4	0.2	1	1.2	2.4	0.8	2	1.2	0.2	0.6	34.6	4	Yes	0.00818182	14.7744	Prochlorococcus marinus str. AS9601	94.84	1086	pmm1359	predicted membrane protein PMM1359	Membrane Transport	Environmental	TAGTGCTTTCAACAATTCTTACCAAGTCGTTTAGCAAAGATACTGCTTTATTAATTCTTAGAGTTATAACTGGAACTGTACTTATCCATCACGGTTATGAGAAATTAGCAAACATAGAAAATTTCGCCGATGCTTTTGTAAGACCATTACATCTCCCATTCCCAATATTTTTGTCATACATAGCGGCATTCTCAGAAATAGGTGGTAGTTGGTTATTAATTATCGGCTTAGCCACAAGATTTGGAGCTTTGGCAATTGTTGGAACAATTTCTGTCGCGATATATCATGCGCTTGTTACTTCAGGTTTTAATATTTTCTTACTAGAGCTTTTACTTTTATATTTCGCTTCAGCAACTTCAATTGCATTGACAGGCCCAGGTAATTTTTCCTTAGATGAAG…	717
530077	HF_READ_05530077	0.2	0	0	0.4	1	2.4	1.8	0.2	0.2	0.2	0.4	0	0.6	2.6	3.6	2.4	3.8	1	1.2	0	0.4	0.2	0.8	0.8	1.4	1	0.6	0.4	0.2	0.4	28.2	4	Yes	0.00113208	16.2342	Prochlorococcus marinus str. MIT 9215	88.45	696	pmm1359	predicted membrane protein PMM1359	Membrane Transport	Environmental	TTATAGTGCTCTCAACAATTCTTACCAAATCGTTTAGCAAAGATACAGCTTTATTAATTCTTAGAGTTATAACTGGGACTGTTCTTATACATCATGGTTATGAGAAATTAGCAAATATAGAAAATTTTGCCGATGCTTTTGTTAGACCACTACATCTACCATTTCCAATATTTTTATCATATATAGCGGCATTCTCGGAGATAGGAGGTAGTTGGTTACTAATTATCGGCTTAGCTACAAGATTCGGAGCTTTGGCAATTGTTGGAACAATTTCTGTCGCTATATACCACGCGCTTGTTACTTCAGGTTTTAATATTTTTTTACTAGAGCTTTTACTTTTATATTTCGCTTCGGCAACTTCAATTGCTTTAACAGGACCTGGTGATTTCTCCTTAGATG…	709
26980	HF_READ_05026980	0	0	0	0.5	0.75	2.5	1.5	0.25	0.25	0.25	0	0	0.25	2.75	6	1.75	4	1.25	1	0	0.25	0	0.75	0.75	2	0.25	0.5	0.25	0.25	0	28	4	Yes	0.00163934	16.0197	Prochlorococcus marinus str. MIT 9301	90.56	795	pmm1359	predicted membrane protein PMM1359	Membrane Transport	Environmental	TAGTGCTTTCAACAATTCTTACCAAATCGTTTAGCAAAGATACTGCTTTATTAATTCTAGAGTTATAACTGGAACTGTTCTTATTCATCACGGTTATGAGAAATTAGCAAATATAGAAAATTTTGCTGATGCTTTTGTCAGGCCATTACATCTTCCATTTCCAATATTTTTATCATACATAGCGGCATTTTCAGAAATAGGTGGTAGTTGGTTACTAATTATCGGCTTAGCTACAAGATTCGGAGCTTTGGCAATTGTTGGAACAATTTCTGTCGCAATATATCACGCGCTTGTTACTTCAGGTTTCAATATTTTTTTACTAGAGCTTTTACTTTTGTATTTCGCTTCAGCAACTTCAATTGCTTTAACAGGGCCTGGTAATTTCTCCTTAGATGAAGT…	717
27288	HF_READ_05027288	0	0	0	0	0.75	0.75	0.5	0.25	0.5	0.25	0	0	0.25	3.25	3.75	2.5	2.25	1.5	1	0	0.75	0	0.5	1	1	1	1.25	0	0	0.25	23.25	4	Yes	0.00716981	14.9073	Prochlorococcus marinus str. MIT 9301	91.87	882	pmm1359	predicted membrane protein PMM1359	Membrane Transport	Environmental	GATAATTTTTAATAGTGCTTCACCAATCTACAAGTCGTTTAGCAAAGATACTGCTTTATTAATCTAGAGTTATAACTGGAACTGTTCTTATTCATCACGGTTATGAGAAATTAGCAAATATAGAAAATTTCGCTGATGCTTTTGTCAGACCTTTACATCTTCCATTCCCAATATTTTTATCATACATAGCGGCTTTCTCTGAAATAGGTGGTAGTTGGCTACTAATTATAGGATTAGCTACAAGATTCGGTGCTTTGGCAATTGTGGGAACAATTTCTGTCGCTATTTACCATGCACTTGTTACTTCAGGTTTTAATATTTTCTTATTAGAGCTTTTACTTTTGTATTTCGCTTCAGCAACTTCAATTGCATTAACAGGACCTGGTAATTTCTCCTTAG…	717
915592	HF_READ_04915592	1.5	2.75	0.75	0.5	0.75	0.25	0.25	0	0	0.25	1	1.25	0.5	3.25	1.75	1	1	0.25	4.5	3.5	2.25	3.5	4.5	2	2.75	0	0.75	2.25	1.25	3.25	47.5	5	NA	0.0939355	10.7437	Prochlorococcus marinus str. AS9601	97.02	553	pmm1462	conserved hypothetical protein PMM1462	Unclassified	Environmental	TAATGGACATTTGTTTGATAACAATCGATAACAACTTAAATAAATCCCTTCAACCAAAAACCGCAATAGGAATGTTATGGCTTCAAACACACTTTGAGAATGATCAGTGGGAAGCGTTGTCAAATAGTACAGTAATAATTTCTGAAAAAAATTCCCAACTATTAATTGAAGACGCCAAGAATGCAGGCCTTAATGTTGAATGTTTTTCTGATATTTCAATGTTGGATGTTTTCCCGAAAAACAATTAAAATAGGAATGTTCAATCTTTAATCATGAAGAAAATTGAAGCAATCATACGTCCATTTAAGCTGGAGGATGTAAAAATTGCATTAGTAAGGGGATCCTCTAGAGTCGACCTGCAGGCATGCAAGCTGCACTTTCT	382
860868	JCVI_READ_1105499860868	1.33	2.5	1	0.17	0.17	0	0.33	0.33	0.33	0.17	0.5	0.33	1	3.67	1.67	0.67	1.83	0.5	4.33	1	1.67	1.5	3.67	0.33	0.83	0.17	1	1.67	0.67	2	35.34	0	NA	0.590693	4.95193	Prochlorococcus marinus str. MIT 9312	95.67	644	pmm1462	conserved hypothetical protein PMM1462	Unclassified	Environmental	ATATGTGTTTAGTTCAAATAAGATTAATGGACATTTGTTTGATAACTATCGATAACTACTTAAATAAATCCCTTCAACCAAAAAGCGCAATTGGAATGTTATGGCTTCAAACACACTTTGAGAATGATCAGTGGGAAGCGTTGTCAAATAGTACAGTAATAATTTCTGAAGAAAACTCCCAATTATTAATTGAAGATGCCAATAATGCGGGCCTTAATATTAAATGTTTTTCTGATATTTCAATGTTGGATGTTTTCCCAAAAAACAATTAAAATAGGAATATTCAATCTTTAATCATGAAGAAAATTGAAGCAATCATACGTCCATTTAAGCTGGAGGATGTAAAAATTGCATTAGTAAACTCCGGCATTGTTGGAATGACAGTTAGTGAAG	393
891329	JCVI_READ_1103769891329	1	0	1	0	0	2	2	0	1.17	0	1	0	0	0	1	2	1	0	1	1	0	0	0	2.17	2.33	3.17	3.83	1.83	0	2.67	30.17	9	NA	0.1255	10.1009	Prochlorococcus marinus str. MIT 9312	92.44	1394	ppc	Phosphoenolpyruvate carboxylase	Carbohydrate Metabolism	Environmental	GTAGCTCTGAGTGATTAGATAGTAATAAAGATTCAGGGTTTGTCTCTAGTAATTGGGAAATTCATAGAGCTCAAATAGCTCTTCAAAATCTAGCAAGTAGAAATAATATATTGCTAAGACTTTTTCATGGAAGAGGTGGTTCTGTAGGTAGAGGTGGAGGACCGGCTTATCAGGCAATATTGGCTCAACCAAGCGGCACCTTAAAAGGGCGAATAAAAATTACAGAACAAGGTGAAGTTTTAGCTTCTAAATATAGTCTTCCTGAATTGGCCTTGTACAATCTTGAAACTGTCACAACAGCTGTTATTCAAAATAGTTTAGTAAATAATAGATTGGACGCTACTCCAGAATGGAATCAATTAATGTCTAGGCTGGCTGAAACATCAAGGTCTCATTACC…	1035
923486	HF_READ_04923486	0.17	1	0	0.67	0	0.5	1	0.83	0.33	1.17	1	1.33	0.67	0.83	1	0.83	1.33	1.83	0.83	0.83	1	1.17	1.17	2	0.83	0.33	1.67	0.5	0.17	0.5	25.49	0	NA	0.546456	5.32853	Uncultured Prochlorococcus marinus clone HOT0M-9F4	93.63	1088	ppc	Phosphoenolpyruvate carboxylase	Carbohydrate Metabolism	Environmental	AGCAAGTGCAAGCTTGCATGCTGCAGGTCAACTCTAGAGGATCCCCCAAACAAGAGTAGCAAATTTGTTAAAAAAAATACAGATTGAGCAATTTCTAACAAAAGAAGAAAAAAATTCTCTAAAAAACCAATTAAAAGAGGAAGTAAGACTTTGGTGGAGAACAGATGAATTGCATCAATTTAAACCCTCAGTTTTAGACGAGGTGGATTATGCCTTACATTATTTTCAGCAAGTTTTATTTAATGCGATGCCTCAATTGCGGGGTAGAATCGCTGAAGCACTCACCGAAAATTATCCAGATGTTCAGATGCCCTCTGAATCTTTTTGTAACTTCGGTTCTTGGGTAGGCTCTGATAGGGACGGTAATCCATCGGTCACTCCAGAGATAACATGGAGAAC…	906
104716	HF_READ_05104716	0.2	0.6	0.6	0.2	0.2	0.4	0.8	0.2	0.6	1.2	1	0.6	0.2	0.8	2.6	1.2	0.6	1	1.6	1.4	1	0.4	0.8	1.4	1	0.8	0.4	1.6	0.4	1.2	25	0	NA	0.25931	8.10202	Prochlorococcus marinus str. MIT 9301	96.21	842	ppc	Phosphoenolpyruvate carboxylase	Carbohydrate Metabolism	Environmental	ATATGGAATCTTTTCGACAGATAAAAAATAATAACGTGGATCTGATAACTAACAATGATCCACTTGATAAAAATCGTCTTCTAATAGAAGATTTATGGGAATCTGTACTCAGAGAAGAATGCCCAGATGATCAAGCAGAGAGATTGATACAGCTTAAAGAATTAAGTTATTCAAAACAAATTGATGGTAATAGTTCAAAAACTTTTAAAAATGAAATAGTTGATATTGTAAATTCTATGGATTTAGCAGAATCCATTGCAGCAGCAAGGGCGTTTTCGTTGTATTTTCAACTCGTGAATATTTTGGAACAGAGAGTTGAGGAAGATAGATATATTCAAAGCTTTACCAATAAGGATGTTCAAAAATCGCCCGACAATCTTGATCCTTTTGCCCCAGCAT…	546
427311	HF_READ_05427311	0.33	1.17	0.5	0.33	0	0	0.5	0.5	0.33	1	0.5	0.5	0.17	0.5	0.83	1	1	0.83	1.33	2	0.83	1.17	0	1.5	1.17	1.17	1.67	1	0.83	1.67	24.33	3	NA	0.0809722	11.0805	Uncultured Prochlorococcus marinus clone HF10-11H11	95.82	1318	ppc	Phosphoenolpyruvate carboxylase	Carbohydrate Metabolism	Environmental	CGCACTTAAAGGCGGATGAATACAGACAGGGGAGTTTAGCTCTAAATATAGTCTTCCCGAACTGGCTTTGTACAATCTGAGACTGTACTACAGCGGTAATTCAAAATAGTTTGGTAAATATAGACTTGACGCTACTCCAGAATGGAATCAATTAATGTCAAGGCTGGCAGAAACATCAAGGTCTCATTACAGAAAATTAGTGCACGAGAATCCTGATTTGTTAAATTTCTTTCAAGAGGTCACTCCAATAGAAGAAATAAGTAAATTGCAGATATCTAGTAGGCCTGCTAGAAGAAAAAAAGGTGCAAAAGATTTGTCAAGTTTAAGAGCTATTCCATGGGTATTTGGTTGGACACAAAGTAGATTTCTTTTGCCAAGTTGGTTTGGAGTAGGCACTGC…	918
936768	HF_READ_04936768	0.5	0	0	0	0	0	0	0.5	0.5	0.5	0	0.5	0.5	0.5	0.5	2	1	2	0	1.5	0	0.5	2.5	1	0	0.5	2.5	0.5	0.5	0	18.5	2	NA	0.225381	8.58177	Uncultured Prochlorococcus marinus clone HOT0M-9F4	94.56	1348	ppc	Phosphoenolpyruvate carboxylase	Carbohydrate Metabolism	Environmental	TGCAATTAAGTTATATTTAGAAAAATTAAATACACCAAGAAAGAAATAATTTTAGCTGATAGTGGGTGGAAATTGCTTAGAGGGAGAGATAGATAACAAAAATCTAGAATAAAGTGAAACTATATACAGTCAGTCAACGAATTTACTTATGATCTAGAACTAATAAAAAATAGCTTGATTAGTACAGATTTAACTTGTGAATCTGTAAACACCTTACTTACTCAAGTTCATATTTTTGGATTTTCGTTAGCTAGCTTAGATATTCGTCAAGAGAGTACAAGGCATAGTGATGCTATACAAGAGCTTACAAATCATCTTGATTTATCTTTTCAATATGACCAAATGTCTGAGGAAGAGAAAATTAAATGGCTTATAGACGAATTAAATACAAAAAGGCCT…	971
11949	JCVI_ORF_1112710011949	1	2	0	0	0	0.5	0	0.5	1	1.5	2.5	0	0	0.5	0.5	0	0	0.5	5	2	0.5	1	0.5	1.5	0	0	0.5	1.5	0	2	25	10	NA	0.0651711	11.5517	Prochlorococcus marinus str. MIT 9312	88.17	565	rpoD	RNA polymerase sigma factor	Transcription	Environmental	CTATGTGTCCAGTTGCAGCAGAATCAAAGAATTCTAAACCTAGTTCAAGTAAAAAGATTAATAAAAAAATTAAAACCAACTTAGAAACATTAGTTGATGAAGATACAAAGAACAGTAGTCAAGATTTAAAGTCATCTTCAAATTTTAGTGAAAGCACCATAGAAAATAATGAATTTAGTGATTCAGAGGAAGATGACAAAGGGCTTGGGAACATAAAGCTTGGCCCCAAAGGGACATACACTGAAGATTCAATAAGAGTCTATCTACAAGAAATTGGAAGAATTAGACTTTTAAGACCAGATGAAGAAATTGAACTTGCGAGAAAAATTGCTGATTTACTCCAATTAGAAGAACTGGCAACTCAATATGAGTCAGAAAAAGGGCATTTCCCATCTGTTA…	623
202663	HF_READ_05202663	0.4	0.4	1	0.4	0.6	0	0	0.2	0.4	0.8	0.6	0	0.4	0.4	1	1	1.4	1.8	0.6	1.2	0.8	0.4	0.6	0.2	1	0.2	1	0.2	1	0.4	18.4	0	NA	0.522709	5.58898	Prochlorococcus marinus str. AS9601	94.65	1156	ppc	Phosphoenolpyruvate carboxylase	Carbohydrate Metabolism	Environmental	AGAAGTGCCAAGCTTGCATGCTGCAGGTCGACTCTAGAGGATCCCCAGATAGATATATTCAAAGCTTTACCAATAAGGATGTTCAAAAATCGCCCGCTAATCTTGATCCTTTTGCCCCAGCATTGGCTAGGCAAAATGCTCCAGTAACTTTTAGAGAATTATTTTACAGGCTGAGAAAATTAAATGTACCACCAGGCAAATTAGAGGAGTTATTGCAGGAAATGGATATTCGTTTAGTTTTTACTGCACATCCGACGGAGATCGTAAGACATACTATTAGACATAAGCAAACAAGAGTAGCAAATTTGCTAAAAAAAATACAGATTGAGCAATTTTTAACAAAAGAAGAAAAAAATTCTTTAAAAACCCAATTAAAAGAGGAAGTAAGACTTTGGTGGA…	859
76412	HF_READ_05076412	0.2	0.8	0.4	0.4	0.2	0.2	0.6	0.8	0.2	0.4	0.4	0.6	0.4	0	1.4	0.6	0.4	0.8	1	0.4	1.6	0.6	1	1.2	0.2	0.6	0.8	0.4	0.4	1	18	0	NA	0.737633	3.75589	Uncultured Prochlorococcus marinus clone HOT0M-9F4	95.41	1251	ppc	Phosphoenolpyruvate carboxylase	Carbohydrate Metabolism	Environmental	ACTGGCTTAAGCCAAAATGCTCCAGTACTTTTAGAAGAATTATTTTACAGACTAGAAAATTAAATGTACACCAGGAAAATTAGAGAGTTATTACAGGAAATTGATATTCGTTTAGTTTTTACTGCACATCCGACGGAGATAGTAAGACATACGATTAGACATAAGCAAACAAGAGTTGCTAATTTGTTAAAAAAAATACAGATTGAGCAATTTCTAACAAAAGAAGAAAAAATTTCTCTAAAAACCCAATTAAAAGAGGAAGTAAGACTTTGGTGGAGAACAGATGAATTGCATCAATTTAAACCTTCAGTTTTAGATGAAGTTGATTATGCCTTGCATTATTTTCAGCAAGTTTTATTTAATGCGATGCCTCAATTGAGGGGCAGGATCACTGAAGCA…	882
571784	HF_READ_05571784	0.33	0.17	0.17	0.17	0	0.33	0.33	0.33	0.33	0.33	0.5	0.67	0.5	0.67	0.5	1.67	1.5	1.17	0.67	1	0.5	0.33	1.17	0.83	0.33	0.5	0.33	0.67	0.33	0.17	16.5	2	NA	0.242874	8.32606	Uncultured Prochlorococcus marinus clone HF10-11H11	95.8	904	ppc	Phosphoenolpyruvate carboxylase	Carbohydrate Metabolism	Environmental	ATATGGAATCTATTCGACAGATAAAAAATAATAATGTGGATTTGATAAGTAACAATGATCCACTTGATAAAAATCGTCTTCTTATCGAAGATCTCTGGGAATCTGTGCTCAGAGAAGAATGCCCAAATGATCAAGCAGAGAGATTGATACAACTTAAAGAATTAAGTTATTCAAAACAAATTGATGGCGATAGTTCAAAAACTTTTAAAAATGAAATAGTTGATATTGTAAATTCTATGGATTTAGCAGAATCCATAGCAGCAGCAAGAGCGTTTTCATTGTATTTTCAACTCGTGAATATTTTGGAACAAAGAGTTGAGGAAGATAGATATATTCAAAGCTTCACCAATAAGGATGTTCAAAAATCGCCCGACAATCTTGATCCTTTTGCTCCAGCAT…	594
834075	JCVI_READ_1103769834075	0.8	0	1.2	0	0	0.8	0.8	0	0	0.8	0	0	0	0	0	1.4	0.8	0	2.2	0	0	1.6	0	0.2	1.6	1.6	0.8	1	0	0.6	16.2	0	NA	0.432242	6.36215	Prochlorococcus marinus str. AS9601	90.47	1152	ppc	Phosphoenolpyruvate carboxylase	Carbohydrate Metabolism	Environmental	GTTAAGCGGAGCGAGATGGGACTTCTTGATCAAATTCACAAAAGTCAAAATTATTAGTCGTCCCGCTTTTCGAAACTGTTGAAGACCTTAAAAGAGCACCAGAAGTAATTGAAAAGTTGTTTAAATTAGATTTTTATAGATCTTTATTGCCAAAAGTTGGAGAATCTCTTAAACCTCTGCAAGAATTGATGCTTGGATATTCTGATAGCAATAAAGATTCAGGTTTCGTTTCCAGTAATTGGGAAATTCATAGAGCTCAAATAGCTCTTCAAAATCTTGCAAGTAGAAATAATATATTGCTGAGACTTTTTCATGGCAGAGGCGGTTCTGTTGGTAGAGGTGGAGGCCCAGCCTATCAGGCAATATTGGCTCAACCAAGTGGTACTTTAAATGGTCGAA…	1093
17821	A9601_17821	0.2	0.2	0	0.2	0	0.4	0.4	0.2	0.4	0.4	0	0.2	0.4	0.4	1.8	1.4	1.2	0.6	0.6	0.2	0.4	0.4	0.6	1	0.2	0.4	0.8	1.2	0.6	1.2	16	2	NA	0.0808935	11.0638	Prochlorococcus marinus str. AS9601	100	5757	ppc	Phosphoenolpyruvate carboxylase	Carbohydrate Metabolism	Genomic	ATGGAATCTTTTCGCCAGGTAAAAAATAATAATGTGGATCTGATAAGTAACAATGATCCACTTGATAAAAATCGTCTTCTAATTGAAGATCTCTGGGAATCTGTGCTAAGAGAAGAATGCCCAGATGATCAAGCAGAAAGGTTGATACAGCTTAAAGAATTAAGTTATTCAAAACAAATTGATGGCGATAGTTCAAAAACTTTTAAAAATGAAATAGTTGATATTGTAAATTCTATGGATTTAGCAGAATCCATAGCTGCAGCAAGGGCTTTTTCATTATATTTTCAACTTGTGAATATTTTGGAACAAAGAGTTGAGGAAGATAGATATATTCAAAGCTTTACCAATAAGGATGTTCAAAAATCGCCCGACAATCTTGATCCTTTTGCCCCAGCATTG…	2970
520981	HF_READ_05520981	0	0.67	0	0.33	0	0	1.17	0.33	0.33	0	0.17	0	0.17	0.83	1.17	0.83	0.5	0.83	0.83	0.33	0.17	0.17	0.33	0.83	1	0.67	0.83	1	0	0.83	14.32	9	NA	0.015875	13.7816	Uncultured Prochlorococcus marinus clone HOT0M-9F4	96.75	636	ppc	Phosphoenolpyruvate carboxylase	Carbohydrate Metabolism	Environmental	AGCTGACAAGCCTTGCATGCCTGCAGGTCGACTCTAGAGGATGCCCCTTGGCAGTAAAGAAAATAAAGATTCTTTTGATGATATTTTTGAAGTAATTTCTAAGGAATATACTCTTACAAAATCTTTAATACTTGAAATTACTTGTAAAAATAAGCTCCTAGAATCTGATAGAGACTTGAAATCATCAGTAAGCTTGAGAAATAAGACAATTATTCCATTAGGGTTTTTGCAGGTTTCACTTCTAAGAAGATTAAGAGACCAGACAAGACAACCCCCAATAAGCGAATTTATGATAGATAAAGATGAATCTAGAAGGGCTTACAGCAGAAGTGAACTATTGAGGGGAGCACTTTTAACTATTAATGGGATAGCAGCTGGCATGAGAAATACAGGTTAATA…	425
3243	JCVI_READ_1095448003243	0.5	0.5	0.25	0	0	0	0	0	0.25	0.25	0	0	0.25	0	0.25	1	1.5	1.25	1	0.5	0.5	0.75	0.5	0.5	0.75	0.5	2.25	0	0.25	0.5	14	1	NA	0.186735	9.14735	Prochlorococcus marinus str. MIT 9215	93.6	1530	ppc	Phosphoenolpyruvate carboxylase	Carbohydrate Metabolism	Environmental	ATCACAGGCTGAGAAAATTAAATGTACCACCAGGTAAATTAGAAGAGTTATTGCAGGAAATGGATATCCGTTTAGTTTTACTGCACATCCGACTGAAATAGTGAGACATACGATAAGACATAAGCAAACAAGAGTAGCCAATTTGTTAAAAAAAATACAGATTGAGCAATTTCTAACAAAAGAAGAAAAAAATTCTCTCAAAACTCAATTAAAAGAGGAGGTAAGACTTTGGTGGAGAACAGATGAATTACATCAATTTAAACCATCAGTTTTAGATGAAGTAGATTATGCCTTGCATTATTTTCAGCAAGTTTTATTTAATGCAATGCCTCAATTGAGGGGCAGGATCGCTGAAGCACTTATCGAAAATTATCCAGATGTTCAGTTACCCTCTGAATC…	1129
532889	HF_READ_05532889	0.6	0	0.2	0.2	0.4	0	0.2	0.6	0	0	0.6	0.2	0	0.2	1.4	0.6	0.4	0.6	1.2	0	1.2	0	0.8	0.8	1.4	0.2	0.6	0.4	0.2	0.2	13.2	0	NA	0.298391	7.66572	Uncultured Prochlorococcus marinus clone HOT0M-9F4	96.36	1318	ppc	Phosphoenolpyruvate carboxylase	Carbohydrate Metabolism	Environmental	TGTACGCCATCTAGTAATTCAATGAGTCATAGTGCATCTGATTTACTGAAGTCTCTACTGCAAAGAAATGGGACTCTGATCAAAATTCACAAAAGTCAAAATTATTAGTTGTACCTCTTTTTGAAACTGTGGAAGATCTCAAAAGAGCACCAGAAGTAATGGAAAAGTTGTTTAAATTAGATTTCTACAGATCATTATTGCCTAAAGTAGGAGAATCTTTTAAACCATTGCAAGAATTAATGCTTGGATATTCTGATAGCAATAAAGATTCGGGGTTTGTTTCTAGTAATTGGGAAATTCATAGAGCCCAAATAGCTCTTCAAAATCTCTCAAGTAGAAATAATATATTGCTAAGACTTTTTCATGGAAGAGGTGGTTCTGTAGGGAGAGGAGGAGGAC…	882
415233	HF_READ_05415233	0	0	0.4	0.2	0	0.2	0.4	0.4	0	0	0.4	0	0.2	0	0.2	0.8	0.2	0.6	0.6	0.6	0.6	0.8	1	0.4	1.6	0.2	1	0.2	0.4	1	12.4	0	NA	0.520503	5.61596	Uncultured Prochlorococcus marinus clone HOT0M-9F4	95.47	1178	ppc	Phosphoenolpyruvate carboxylase	Carbohydrate Metabolism	Environmental	TATGCCAAAAGTGGGAGAATCTTTTAAGCCTCTGCAAGAATTAATGCTTGGATATTCTGATAGCAATAAAGATTCGGGGTTCGTTTCTAGTAATTGGGAAATTCATAGAGCTCAAATCGCTCTTCAAAATCTTTCAAGTAAAAATAACATATTGCTAAGACTTTTTCATGGAAGAGGTGGTTCTGTAGGTAGAGGAGGAGGACCAGCTTATCAGGCAATATTGGCTCAACCAAGCGGCACTTTAAAAGGGCGTATAAAAATAACAGAGCAAGGTGAAGTTCTAGCTTCCAAATATAGTCTTCCGGAACTAGCTTTGTACAATCTTGAGACTGTCACTACAGCGGTAATTCAGAATAGTTTGGTCAATAATAGACTTGACGCTACTCCAGAATGGAATCA…	800
35207	HF_READ_05035207	0.5	0.25	0	0	0	0	0.25	0	0	0.25	0.25	0.25	0.5	0.5	0.25	1.5	0.25	0.75	0.75	0.5	0.5	0.5	0	1	0.5	0.75	1.25	0	0	0.25	11.5	0	NA	0.397976	6.69457	Prochlorococcus marinus str. AS9601	96.27	1380	ppc	Phosphoenolpyruvate carboxylase	Carbohydrate Metabolism	Environmental	AGAAGTGCCAAAGCTTGCATGCCTGCAGGTCGACTCTAGAGGATCCCCATTTATTAGCTGATAGTGGATGGAAATTTGACTTGGAGGGAGAAACTGATAACAAAAATCTAGATAAAGTTGAAAACTTATATTACAAGTCAGTAAACGAATTTACTTATGATCTAGAACTTATTAAAAATAGCTTAATTAGTACAGATCTAAATTGTGAGTCTGTAAATACCTTACTCACTCAAGTTCATATTTTTGGATTTTCTTTAGCAAGTTTAGATATTCGTCAAGAGAGTACAAGGCATAGTGACGCTATACAAGAGCTTACAAATTATCTTGATTTATCTGTTCAATATGACCAAATGTCTGAGGATGAGAAAATTAAATGGCTTATAGACGAATTAAATACAA…	903
58391	JCVI_READ_1108830058391	0	0	0	0	0.5	1	2.5	0.5	0.5	0	0.5	0.5	0	0	0.5	0.5	1.5	1	3	1	0.5	0	1.5	1	0.5	0.5	1	2.5	1.5	1.5	24	9	NA	0.168064	9.40697	Uncultured Prochlorococcus marinus clone HOT0M-9F4	90.43	1017	ppc	Phosphoenolpyruvate carboxylase	Carbohydrate Metabolism	Environmental	GCGGACGAGCGAGCTCAAATATAGTCTTCCTGACTGGCTTTGTATAATTTAGAAACTGTTACTACTGCTGTTATCCAAAATAGTTTAGTAAATAATAGACTCGATGCTACTCCGGAATGGAATCAATTAATGTCAAGGCTGGCAGAAACATCGAGATCTCACTACAGGAAATTGGTGCATGAGAATCCTGATTTGTTAAATTTCTTTCAAGAGGTTACACCTATAGAAGAAATAAGTAAATTGCAGATATCAAGCAGGCCTGCGAGAAGAAAAAAAGGTGCAAAAGATCTTTCAAGTTTAAGAGCTATTCCATGGGTATTTGGCTGGACACAAAGTAGATTTCTTTTGCCAAGTTGGTTTGGTGTGGGAACTGCTTTATCATCTGAATTAAATTCTGAC…	904
438840	JCVI_ORF_1105143438840	0	0	0	0.33	0	0	0.67	0	0.33	1	0.33	0	0	0.33	4	2.67	1.67	0.33	1	1	0.67	0	0	2	1.67	0.33	2.33	1.67	0.33	1.33	23.99	1	NA	0.0808966	11.0686	Prochlorococcus marinus str. MIT 9312	89.42	997	ftsZ	cell division protein FtsZ	Cell cycle	Environmental	ATGAGCTTCGGTAACAATCCAAACTTTGATCAATCGAGAGAAATCCTTCCAAGCCAAAACGCCAAAATAGAAGTTATTGGCGTTGGAGGAGGTGGAAGCAATGCGGTTAACAGAATGATAAATAGTGATTTAGAAGGCGTATCTTTTCGAGTTCTCAACACTGATGCACAAGCACTACTTCAGTCCTCTGCAGAGCGTAGAGTCCAACTAGGACAAAACCTTACAAGAGGTCTAGGTGCAGGAGGTAATCCTAGTATTGGACAAAAAGCTGCAGAAGAATCTAAAGAAGAGCTTCAACAAGCTTTAGAAGGATCTGATCTAGTTTTTATAGCTGCTGGAATGGGCGGTGGAACTGGTACAGGGGCGGCTCCTGTAGTCGCAGAAGTCGCAAAACAGAGT…	879
96347	HF_READ_05096347	0.6	0	0.4	0	0.2	0	0.4	0	0	0.4	0.4	0	0.2	0	0.4	0.6	0.6	1.2	1.4	1	0.4	0.2	0.6	0.8	0.4	0.2	0.4	0.4	0	0.2	11.4	0	NA	0.451255	6.21039	Uncultured Prochlorococcus marinus clone HOT0M-9F4	94.62	1132	ppc	Phosphoenolpyruvate carboxylase	Carbohydrate Metabolism	Environmental	AGGAAAGGGCCGGGTGCCAAGCTTGCATGCCTGCAGGTCGACTCTAGAGGATCCCCCGTCTTTTAATTGAAGATCTATGGGAATCTGTGCTTAGAGAAGAATGCCCAGATGATCAAGCAGAGAGATTGATACAGCTTAAAGAATTAAGTTATTCAAAACAAATTGATGGGGATAGTTCAAAAACTTTTAAAAATGAAATAGTTGATATTGTAAATTCTATGGATTTAGCAGAATCTATAGCAGCAGCAAGGGCGTTTTCATTGTATTTTCAACTCGTGAATATTTTAGAACAAAGAGTTGAGGAAGATAGATACATTCAAAGCTTTACCAATAAGGATGTTCAAAAATCCCCCGATAATCTTGATCCTTTTGCCCCAGCATTGGCTAGGCAAAATGCTC…	875
943139	HF_READ_04943139	0.4	0.4	0	0.2	0.4	0.4	1	0.2	0	0.6	0.2	0.4	0.2	0.2	1	0.4	0	0.2	0.2	0.2	0	0.2	0.4	0.4	0.4	0.6	1.2	0.4	0	0.6	10.8	0	NA	0.325675	7.39086	Prochlorococcus marinus str. MIT 9301	92	1128	ppc	Phosphoenolpyruvate carboxylase	Carbohydrate Metabolism	Environmental	CAGATTGAAGTTAAGTTATATATTAGAAAAATTAAGATTAACCCAAGAAAGGAATAATTTATTAGCTGATAATGGTGGGAAATTTGACTTGGAGGGGGAAATAGATACTAAAAATATAGATAAAGTTGAAAACTTATATTACAAATCAGTTAACGAATTTACATATGATCTCGAGCTTATTAAAAATAGCCTGATTAGTACAGATTTAACTTGCGAGGCAGTAAATACCTTACTTACTCAAGTTCATATTTTTGGATTTTCTTTAGCAAGCTTAGATATTCGTCAAGAAAGTACAAGGCATAGTGACGCAATACAAGAGCTCACAAATTATCTTGATTTATCTGTGCAATATAACCAAATGTCTGAGGAAGAGAAAATTAAATGGCTTGTAGATGAATT…	863
315226	JCVI_READ_1103769315226	0	0	0	0	0	0	0	0	0	0	0	0	0	0	0.5	0.5	1	1	0	0.5	0.5	0	0	0.5	0.5	1	1	1	1	1	10	9	NA	0.14404	9.80232	Uncultured Prochlorococcus marinus clone HOT0M-9F4	91.91	1370	ppc	Phosphoenolpyruvate carboxylase	Carbohydrate Metabolism	Environmental	GTTGGTGACGACTTAAGATTGAATTAAGTTATATTTTAGAAAAACTAAGATTAACGCAAGAAAGGAATAATTTATTATCTGATAGTGGATGGAAATTTGATTTAGAGGGAGAAATGGATGTTAAAAATATAGATAAAGTTGAAAACTTATATTACAAATCAGTAAACGAATTTACATATGATCTTGAACTAATTAAAAGTAGCCTTATTAGTACAGATTTAAATTGTGAAGCATTAAACACCTTACTTACTCAGGTTCATATTTTTGGATTTTCTTTAGCAAGTTTAGATATTCGTCAAGAAAGTACAAGACATAGTGACGCTATACAAGAGCTTACAAAGTATCTTGATTTATCTCTGCTATATGATCAAATGTCTGAGGAAGAGAAAATTAAATGGC…	1068
605133	JCVI_READ_605133	0.17	0.17	0	0	0.17	0	0	0.67	0.33	0.5	0.33	0	0	0.67	0.17	0.67	0.5	0.67	0.67	0.33	0.33	0.17	0.67	0.5	0.5	0	0.5	0.5	0.17	0.33	9.69	2	NA	0.187494	9.1282	Prochlorococcus marinus str. MIT 9215	93.81	1423	ppc	Phosphoenolpyruvate carboxylase	Carbohydrate Metabolism	Environmental	AATGCCATCAAATTTAAACCCATCTGTTATTGGACGAAGTAGATTATTGCCTTGCATTTATTTTCAACAAGTTTTGTTTTAATGCTATGCCCCAATTGAGGGGAAGGATCGCTGAAGCACTAACCGAAAATTATCCAGATGTTCAGTTGCCCTCTGAATCTTTTTGTACTTCGGTTCTTGGGTAGGCTCCGATAGGGACGGTAATCCATCGGTTACTCCTGAGATAACATGGAGAACTGCTTGCTACCAAAGGCAGTTGATGTTGGAAAGATATATTATTGCGACATCTAATCTTAGAGATCAATTAAGTGTCTCAATGCAATGGAGTCAAGTCAGTTCTTCTTTATTAGAGTCACTTGAAACGGATAGGGTTAAGTTCCCAGAAATCTATGAAGCTAG…	1028
840648	HF_READ_04840648	0	0.33	0.17	0	0	0.33	0.17	0	0	0.17	0.83	0.17	0.33	0.17	1.17	0.83	0.5	0.5	0.83	0.67	0.5	0	0.67	0.33	0.17	0	0.17	0.5	0	0	9.51	0	NA	NA	NA	Uncultured Prochlorococcus marinus clone HOT0M-9F4	96.59	1003	ppc	Phosphoenolpyruvate carboxylase	Carbohydrate Metabolism	Environmental	ATATGGAATCTTTTCGACAGATAAAAAACAATAACGTGGATCTGATAAGTAACAATGATCCACTTGATAAAAATCGTCTTTTAATTGAAGATCTATGGGAATCTGTACTCAGAGAAGAATGCCCAGATGACCAAGCAGAGAGATTGATACAGCTTAAAGAATTAAGTTATTCAAAACAAATTGATGGTGATAGTTCAAAAACTTTTAAAAATGAAATAGTTGATATTGTAAATTCTATGGATTTAGCAGAATCTATTGCAGCAGCAAGGGCGTTTTCATTATATTTTCAACTAGTGAATATTTTGGAACAAAGAGTTGAGGAAGATAGATATATTCAAAGCTTTACCAATAAGGATGTTCAAAAATCGCCCGACAATCTTGATCCTTTTGCTCCAGCAT…	709
215008	JCVI_READ_1099650215008	0	0.33	0	0	0.17	0.33	0.33	0.17	0.33	1.17	0	0.5	0.33	0.33	0.83	0.33	0	0.5	0.83	0.33	0.17	0.17	0.17	0.83	0	0.17	0.5	0.33	0	0.17	9.32	0	NA	0.664905	4.32854	Uncultured Prochlorococcus marinus clone HOT0M-9F4	93.32	892	ppc	Phosphoenolpyruvate carboxylase	Carbohydrate Metabolism	Environmental	CTTCCCAAGGTAAACCTTTTTAGAGAAATTTATTTTTACAGGTTTGAGGGAAAATTTAAAATGTACCCACCCAGGAAAAATTTAGAGGGAGTTATTGCAGGAAATGGATATTCGTTTAGTTTTTACAGCCCATCCGACCGAGATCGTAAGACATACGATTAGACATAAGCAAACAAGAGTAGCAAATTTGTTAAAAAAAATACAGATTGAGCAATTTCTGACAAAAGAAGAAAAAAATTCTTTAAAAAACCAATTAAAAGAGGAAGTAAGACTTTGGTGGAGAACAGATGAATTGCATCAATTTAAACCTTCAGTTTTAGACGAGGTTGATTATGCCTTACATTATTTTCAACAAGTTTTATTTAATGCGATGCCTCAATTGCGGGGTAGAATCGCTGA…	891
969614	HF_READ_04969614	0.17	0.5	0	0	0	0.33	0.17	0	0	0	0.33	0	0.33	0.17	0.5	1.67	0.17	0.17	0.83	0.33	0.5	0	0.5	0.5	0.33	0	0.5	0.17	0	0.17	8.34	0	NA	NA	NA	Uncultured Prochlorococcus marinus clone HF10-11H11	94.01	880	ppc	Phosphoenolpyruvate carboxylase	Carbohydrate Metabolism	Environmental	ATATGGAATCTTTTCAACAGATAAAAAATAATAACGTGGATCTGATAAGTAAAAATGATCCGCTTGATAAAAATCGTCTTTTAATAGAAGATTTATGGGAATCTGTGCTCAGAGAAGAATGCCCTGATGATCAAGCAGAAAGATTGATACAGCTTAAAGAATTAAGTTATTCAAAACGAATTGATGGTGATAGTTCAAAAACTTTTAAAAATGAAATTGTTGATATTGTAAATTCTATGGATTTAGCAGAATCCATTGCAGCAGCAAGGGCTTTTTCATTATATTTTCAACTCGTGAATATTTTGGAACAAAGAGTTGAGGAGGATAGATATATTCAAAGCTTTACCAATAAGGATGTCCAAAAATCACCAGATAATCTTGATCCTTTTGCTCCAGCAC…	628
922605	HF_READ_04922605	0	0	0	0	0	0	0	0	0.25	0.5	0.5	0	0	0	1.25	0.5	0.5	1	0.25	0.25	0.25	0.25	0.25	0.5	0.25	0.25	0.75	0.5	0	0	8	0	NA	NA	NA	Uncultured Prochlorococcus marinus clone HOT0M-9F4	94	1124	ppc	Phosphoenolpyruvate carboxylase	Carbohydrate Metabolism	Environmental	GTATGGAATCTTTTCGACAGATAAAAAATAATAACGTGGATCTGATAAGTAACAATGATCCACTTGATAAAAATCGTCTCTTAATAGAAGATTTATGGGAATCTGTACTCAGAGAAGAATGCCCAGACGATCAAGCAGAGAGATTGATACAGCTTAAAGAATTAAGTTATTCAAAACAAATTGATGGTGAAAGTTCAAAAACTTTTAAAAATGAAATAGTTGATATTGTAAATTCTATGGATTTAGCAGAATCCATTGCAGCAGCAAGGGCGTTTTCATTATATTTCCAACTCGTGAATATTTTGGAACAAAGAGTTGAGGAAGATAGATATATTCAAAGCTTTACAAACAAGGATGTTCAAAAATCTCCCGACAATCTTGACCCTTTTGCTCCAGCAT…	846
821766	JCVI_READ_1103769821766	1	0	0.5	1	0.5	0.5	2	0	0.5	0.5	0.5	0.5	0.5	2.5	1.5	2	1	0.5	1	2	0.5	0	0	2	0	0	0	1	0	1	23	0	NA	0.426426	6.40935	Prochlorococcus marinus str. MIT 9312	89.91	946	phoH	Phosphate starvation-inducible protein	Unclassified	Environmental	AAGAGTCATCTTCACATGCTGAACTTGGGAAAAAAGTTCTTGCCCGTTCTAAAGAAGGTAGATACTTAAGACCAAGAACTTTAAGGCAAAAGAATATGTGAGTCAATTGAAAACTTTGATCTCACCTTTGCAATAGGTCCCGCTGGGACTGGTAAAACATTTTTGGCAACTGTTTGTGCAGCAAGACTATTGAATGAGAAAAAAATAGAAAGAATTGTTCTAACCAGACCAGCTGTAGAAGCCGGGGAAAGTTTGGGATTCTTGCCAGGAGATTTGCAACAAAAAGTAGATCCATATTTAAGACCATTATTTGATTCTTTACATAGTATTTTCGGATTTGATAGAACAAATTCTTTAATCGATAAAGGAATTATCGAAGTTGCACCTTTAGCATTTATG…	921
63745	JCVI_READ_1093022063745	0.2	0.2	0	0.2	0	0	0	0	0.4	0	0	0.4	0.4	0	0.6	0.4	0.4	0.6	0.6	0.2	0.4	0.4	0.2	0.6	0	0.4	1	0	0.2	0	7.8	0	NA	NA	NA	Prochlorococcus marinus str. MIT 9215	90.69	1233	ppc	Phosphoenolpyruvate carboxylase	Carbohydrate Metabolism	Environmental	GTATCGTTTAGTTTTTACAGCACACCCGACCCGAGGATAGTAAGGACATACAATTAGACATAAGGCAAACCCAGAGTTGCAAATTTAATAAAAAAGATACAAATTGAGCAATTTTTAACTAAAGAAGAAAAAAAATTCTTTAAAAACGCAATTAAAAGAGGAGGTAAGACTTTGGTGGAGAACAGATGAATTGCATCAATTCAAACCTTCAGTCTTAGATGAAGTGGATTATGCCTTGCATTATTTCCAGCAAGTTTTATTTAATGCAATGCCTCAATTGAGGTGCAGGATCGCTGAAGCACTCAACGAAAATTATCCAGATGTTCAGATGCCCTCTGAATCTTTTTGTAACTTCGGTTCTTGGGTAGGCTCTGATAGAGATGGGAATCCTTCTGTTAC…	1084
985401	HF_READ_04985401	0	0.2	0.4	0.2	0.4	0	0.4	0	0.2	0	0.6	0	0	0.4	0.2	0.4	0.2	0.6	1.2	0.4	0.2	0	0.2	0	0.4	0	0.4	0.4	0	0	7.4	0	NA	NA	NA	Prochlorococcus marinus str. MIT 9301	97.27	842	ppc	Phosphoenolpyruvate carboxylase	Carbohydrate Metabolism	Environmental	ATATGGAATCTTTTCGACAGATAAAAAATAATAACGTGGATCTGATAAGTAACAATGATCCACTTGATAAAAATCGTCTATTAATTGAAGATCTTTGGGAATCTGTGCTCAGAGAAGAATGTCCAGATGATCAAGCAGAGAGATTGATACAGCTTAAAGAATTAAGTTATTCAAAACAAATTGATGGTGATAGTTCAAAAACTTTTAAAAATGAAATAGTTGATATTGTAAATTCTATGGATTTAGCAGAATCCATAGCTGCAGCAAGGGCGTTTTCATTATATTTTCAACTCGTGAATATTTTGGAACAAAGAGTTGAGGAAGATAGATATATTCAAAGCTTTACCAATAAGGATGTTCAAAAATCGCCCGACAATCTAGATCCTTTTGCCCCAGCAT…	522
902659	JCVI_READ_902659	0	1	1	0	0.5	0	0	0	0	0	0	0	0	0	0	0.5	0	0.5	0	0	0	0.5	0	0.5	0	0	1.5	0	0.5	0.5	7	0	NA	NA	NA	Prochlorococcus marinus str. MIT 9312	90.76	1237	ppc	Phosphoenolpyruvate carboxylase	Carbohydrate Metabolism	Environmental	CTTTTAGAATGAAATTAAGTTTTATTTAGAAAAAATTGAGGGTAACACCGGGAAAGGAATAATTTTTTAGCTAATAGTGGATGGAAATTTGACTTAGAGGGAGAAATGGATACTAAAAATATAGATAAAGTTGAAAATTTATATTACAAATCAGTAAAAGAATTTACCTATGATCTCGAACTTATTAAAAATAGCCTTATTAGTACAGATTTAACTTGTGAGGCAGTAAATAACTTACTTACTCAGGTTCATATTTTTGGATTTTCTTTGGCAAGTTTAGATATTCGTCAAGAAAGTACAAGGCATAGTGATGCGATACAAGAGCTGACAAATTATCTTGATTTATCTATGCTCTACGATCAAATGTCTGAGGAAGAGAAGATTAAATGGCTTGTAGAT…	1035
452316	JCVI_READ_452316	0.6	0	0	0.6	0	0	0	0	0.2	0.2	0.2	0.6	0.8	0.6	0	0.2	0.4	0.6	0	0.6	0	0	0.8	0	0.2	0	0	0	0	0.2	6.8	0	NA	NA	NA	Uncultured Prochlorococcus marinus clone HOT0M-9F4	92.48	1300	ppc	Phosphoenolpyruvate carboxylase	Carbohydrate Metabolism	Environmental	GTAATGGAAAAAATTGTTTAGATTAGATTTTTACAGATCATTATGCCCAAAAGTGGGAGAATCCTTTAAACCTCTTCAAGGAATTAATGCTTGGATATTCTGATAGCAATAAAGACTCAGGGTTTGTTTCTAGTAATTGGGAAATTCATAGAGCCCAAATAGCTCTTCAAAATCTTGCAAGTAGAAATAACATATTGCTAAGACTTTTTCATGGAAGAGGCGGTTCTGTAGGTAGAGGGGGAGGACCAGCCTACCAGGCGATATTGGCACAACCAAGCGGTACTTTAAAAGGGCGAATAAAAATAACAGAACAAGGTGAAGTATTGGCTTCAAAATATAGTCTTCCTGAACTGGCTTTGTATAATCTAGAGACAGTTACTACTGCTGTTATTCAAAATA…	1037
49597	HF_READ_05049597	0.33	0	0	0	0	0	0.67	0	0	0.67	0.33	0	0	0	0	0.67	0	0	0.33	0	0.33	0.67	0	0.33	0.33	0.33	0.67	0	0.33	0	5.99	0	NA	NA	NA	Prochlorococcus marinus str. MIT 9215	92.76	1035	ppc	Phosphoenolpyruvate carboxylase	Carbohydrate Metabolism	Environmental	AGGGGGGGCGAATTGGAGGGTGGGAACCAGGTTCTTTCTCTATTAGAGTCACTCGAAAACGGATAGGGTTTAGTTCCCAGAAATCTATGAAGCTAGGGCTACAAGGTATCGATCAGAACCTTACAGATTAAAATTAAGTTATATTTTAGAAAAATTAAGGTTAACGCAAGAAAGAAATAATTTATTAGCTGAGAATGGGTGGAAATTTGACTTAGAGGGAGAAATGGATAACAAAAATATAGATAAAGTTGAAAACTTATATTACAAGTCAGTCAAAGAATTTACTTATGATCTCGAATTAATTAAAAATAGCCTAATTAGTACAGATTTAACTTGCGAGTCTGTAAACACCTTACTTACTCAGGTTCATATTTTTGGATTTTCTTTAGCAAGTTTAGA…	780
520455	JCVI_READ_520455	0.17	0	0.33	0.17	0	0	0	0	0.17	0.17	0.17	0.17	0.17	0.33	0.33	0.33	0	0.17	0.33	0.17	0.33	0	0.33	0	0.33	0.33	0.17	0.33	0	0.5	5.5	0	NA	NA	NA	Prochlorococcus marinus str. MIT 9312	93.98	1403	ppc	Phosphoenolpyruvate carboxylase	Carbohydrate Metabolism	Environmental	AGATGGATACAGCTAAAGAAATTAAGTATTTCAAAACAAATGATGGGTGATAGTTCAAAAACTTTTAAAAATGAAATAGTTGATATTGTAAATTCTATGGATTTAGCAGAATCCATAGCAGCAGCAAGGGCGTTTTCATTATATTTTCAACTAGTAAATATTTTGGAACAAAGAGTGGAGGAAGATAGATATATACAAAGCTTTACCAATAAGAATGTTCAAAAATCTCCCGATAATCTCGATCCTTTTGCCCCAGCATTGGCTAGACAAAATGCTCCAGTAACTTTTAGAGAATTATTTTATAGGCTGAGGAACTTAAATGTACCTCCAGGAAAATTAGAGGAGTTATTGCAGGAAATGGACATTCGTTTAGTTTTTACTGCACATCCTACCGAAATA…	1048
972565	CAM_READ_0234972565	0.17	0.17	0.17	0.17	0.17	0	0.17	0	0	0.33	0.17	0	0	0	0.33	0	0	0.17	0.5	0.83	0.17	0.17	0.33	0.17	0.5	0.17	0	0.33	0	0.17	5.36	0	NA	NA	NA	Prochlorococcus marinus str. MIT 9301	90.23	464	ppc	Phosphoenolpyruvate carboxylase	Carbohydrate Metabolism	Environmental	AGAGTGGGTGGCAAATTGACTTGAGGGAGAAATGGATNTTAAAAATATAGATAAAATCGAAAACTTATATTACAAATCGATAAATGAGTTTACGTATGATCTTGAGCTGATTAAAAATAGCCTGATTAGTACAGATTTAACTTGCGAGTCAGTTAATAACTTACTTACTCAGGTTCATATTTTCGGATTTTCTTTGGCAAGTTTAGATATTCGTCAAGAAAGTACAAGGCATAGTGATGCTTTACAAGAGCTTACAAATTATCTTGATTTATCTGTGCAATATGAACAAATGTCTGAGGAAGAAAAAATTAAATGGCTCGTAGACGAATTAAATACAAAAAGACCTTTAATTCCCTCAGATGTTAATTGGACAAAAACTACTGAAGAAAC	390
339252	JCVI_READ_1108800339252	0.5	0	0	0	0	0	0.5	0.5	1.5	1	1	0.5	0	0.5	0.5	2.5	1.5	1	1	0	0	0	0.5	1	2	1	3	1.5	0	1	22.5	1	Yes	0.00047619	17.3269	Prochlorococcus marinus str. MIT 9215	91.23	1027	coxA	cytochrome c oxidase subunit I	Energy Metabolism	Environmental	GCTAAGCGACCTCTTTGGAATACAACAATGGTTTTTTCAATAATGGGGATAGTTGTTTTAGGTTTAGTTGTTTGGGCGCATCACATGTTTACTAGTGGAACGCCACCTTGGATGAGATTATTCTTTACTATCGCAACAGCATTTATTGCTGTTCCAACAGGGATAAAATTTTTCAATTGGGTTGCAACATTGTGGGGAGGTAAAATTTCAATCAATAGTGCAATGTTATTTTCTTGTGGATTTATCATAAATTTTGTTTTTGGAGGAATTACAGGAGTTGCTTTAGCACAGGTTCCTTTTGATATTCACGTACACGATACTTACTTTGTTGTAGCCCATTTTCACTACATAGTTTATGGGGGGACTGTTTTTATTATCTTCTCATCAATATACCATTGG…	817
811052	HF_READ_04811052	0.5	0.5	0.5	0	0	0.5	0	0.5	2	1.5	1	0.5	0	1	1.5	2	2	2.5	1	0	0.5	0	0	0	0	1	2	1	0.5	0	22.5	1	NA	0.00889831	14.5929	Prochlorococcus marinus str. AS9601	97.86	1088	dnaA	chromosomal replication initiator protein	Replication and Repair	Environmental	GCAAGGATATAGCCAGAGGCAGGCAGCTGCATGCTGCAGGTCGACTCTAGAGCATCCCTCGCAAATCAGGAAGTCAAATAGTTATTGCAAGTGACAGACCGACCAGATCAATTGTCGGGAATTCAAGAGAGATTAATTTCTAGGTTCTCAATGGGTATGACCGCAGATATCAACCACCTGACCTTGAGACGAGGACAGCCATCCTTCAAAAAAAGGCAGAACAAGAGAGGATGAGTCTGCCAAGAGATTTAATTCAATTTATAGCAGGAAGATTCACTTCGAATATTCGAGAATTGGAAGGAGCATTCACTAGAGCTGTTGCATTTGCATCAATAACAGGCCTGCCAATGACAGTTCAATCAATTGCTCCAATGCTTGATCCTAATAGTGTTGGAGTAG…	717
15381	P9215_15381	0	0	0	0	0	1	0	0	0	1	0.5	0	1	1	5	0.5	1.5	0.5	0	0.5	0	0.5	0	4.5	1	0	2	0.5	1	0.5	22.5	7	NA	0.231799	8.47248	Prochlorococcus marinus str. MIT 9215	100	2200	ftsZ	cell division protein FtsZ	Cell cycle	Genomic	ATGAGCTTCGGTAACAATCCAAACTTTGATCAATCGAGAGAAATCCTTCCCAGCCAAAATGCCAAAATAGAAGTTATTGGTGTAGGCGGGGGTGGAAGTAACGCTGTTAACAGAATGATAAATAGTGATTTAGAAGGTGTGTCATTTCGAGTCCTAAATACCGATGCACAAGCACTTCTACAGTCTTCTGCAGATCAAAGAGTGCAATTAGGTCAAAACCTTACTAGAGGTTTGGGTGCGGGAGGTAATCCAAGTATTGGGCAAAAAGCCGCCGAAGAATCAAAAGATGAGCTTCAACAAGCGTTAGAGGGATCTGATCTAGTCTTTATTGCCGCAGGAATGGGTGGTGGCACAGGTACAGGTGCAGCACCCGTAGTTGCAGAAGTGGCTAAACAAAGT…	1110
298382	JCVI_READ_1105610298382	1.5	0.5	1.5	0	0.5	2	0	0.5	0.5	0	0.5	0	0.5	2.5	2	0.5	3	0.5	0.5	0.5	0	0.5	1	0.5	1	0	1	0	0.5	0.5	22.5	0	NA	0.377181	6.9236	Prochlorococcus marinus str. MIT 9301	90.25	1183	psaA	photosystem I P700 chlorophyll a apoprotein A1	Energy Metabolism	Environmental	CAGCTGCTCTTTTAGATGCAATGATGCAGGTTCTCCTCTAGTATCATGGAAAGAAATAGCACTATGCAGACATGCTATGCTCATCACTCTGCGATCCGCAGATTATCGGTCAGATATTTCCAGGATTAGCAAGTGGCACAGGTAATTCTTCAGTTTAAATTGGTTAGCTTTCTCAGACTTTCTTACCTTCAAAGGTGGATTGAACCCTGTGACAGGAAGCTTATGGATGACTGATGTTTCTCATCATCATTTAGCTTTTGGTGTGATAGCGATAATTGGTGGTCATATGTACAGAACCAACTATGGTATTGGTCATAGCATGAAAGAAATATTAGATTCACAACAAGGAGACCCAATATTATTCCCTGCTCCTAAAGGTCACCAAGGACTTTTTGAGTT…	1099
832301	HF_READ_04832301	0	0	0	0	0	0	0	0	0	0	0	0	1	0.67	0.67	0	0	0	0.67	0	0	0	0.33	0.33	0.33	0	0.67	0.33	0.33	0	5.33	0	NA	NA	NA	Prochlorococcus marinus str. MIT 9215	92.88	1364	ppc	Phosphoenolpyruvate carboxylase	Carbohydrate Metabolism	Environmental	AGCCTAAAGGAATCTTTCGGCAAATGCCAAAAATAACCCGCTCCGATAAGTAACAATGTCCACGTGGTTAAATTGTTCTNTTAATGGAAGCCTTATGGGGATCCGTACTTAGGGCAGAATGCCCCCGATGGTCCACCAGGAGGGATTGATACAACTTAAAGACTTAAGTATTCAAACAGAGTAAAGGTGATATTCGAACCTTTAAAATGAAATAGTGAATATGTAAATTCTAAGGATTTACCAGAATCCATTGCACCACCAAGGCCGTTTTCATGGTATTTTCAACTCGTGAATATTTGGGAACAAAGANTTGAGGAAGATAGATATATTCAGAGCTTTACCAATAAGGATGGTTCAAAAATCACCTGATAATCTTGATCCTTTTGCTCCGGCATTGGC…	1305
821835	HF_READ_04821835	1	0.4	0.2	0.2	0	0	0.2	0.4	0	0.4	0	0.4	0	0.2	0.8	1.4	0.2	1	1.2	0.6	0.4	0.8	0.4	1.6	1	0.6	1.4	0.6	0.4	1	16.8	2	Yes	0.178403	9.27715	Uncultured Prochlorococcus marinus clone HF10-11H11	95.99	1287	ppc	Phosphoenolpyruvate carboxylase	Carbohydrate Metabolism	Environmental	AGAGACGGCAGGCAGCTGCATGCTGCAGGTCGACTCTAGAGCATCCCCAAGTAAGAGACTTGACGCTACTCCAGAATGGAATCAATTAATGTCAAGGCTGGCAGAAACATCAAGGTCTCATTACAGAAAATTAGTACACGAGAATCCTGATTTGTTAAATTTCTTTCAAGAGGTCACTCCAATAGAAGAAATAAGTAAATTGCAGATATCTAGTAGGCCTGCTAGAAGAAAAAAAGGTGCAAAAGATTTGTCAAGTTTAAGAGCTATTCCATGGGTATTTGGTTGGACACAAAGTAGATTTCTTTTGCCAAGTTGGTTTGGAGTAGGCACTGCATTGTCATCTGAATTAAATTCAGATCCACAACAAATTGAATTATTAAGAGTTCTGCATCAAAGATG…	863
438532	JCVI_READ_1093015438532	0.5	1	1	0.5	0.5	0.5	1	0.5	0	0	0.5	0.5	0	0.5	1.5	0.5	1	1	0	4	1.5	0	0	1	0.5	0.5	2	0	1	0.5	22	0	NA	0.792872	3.24697	Prochlorococcus marinus str. MIT 9215	92.83	1261	ntcA	global nitrogen regulator NtcA	Transcription	Environmental	CTATGATACCTGCTTCTCGAGGATTCAACCGCTTTAGTTCACAGCATTCAGGACAAAGTAAAATTAACTCTGTTGGAGAACGTTTTCCAATTAATAAAACTTTAATGGAAGTTATTAAAGGTCTTGATGGTGCAAGCACAGAAATGGTTGAGAGATCTAAAACAATATTTTTCCCTGGGGACCCTGCTGAAAGGGTTTATCTTATAAGAAGAGGAGCAGTAAGACTGTCAAGAGTTTATGAGTCAGGTGAAGAAATAACTGTTGCTCTTTTAAGAGAGAATAGTCTCTTTGGTGTTTTATCACTTCTGACAGGTCATAGATCCGATCGTTTTTACCATGCTATAGCATTCACAAGAGTTGAAATGATAACAGCTCCTGCAAATTCTGTTTTAAGAGCTA…	940
[truncated: 436 more rows]
