# Supplementary material for: Genetic Diversity Affects the Daily Transcriptional Oscillations of Marine Microbial Populations
Source: PLoS One. 2016 Jan 11;11(1):e0146706. doi: 10.1371/journal.pone.0146706 (PMC4709009; doi:10.1371/journal.pone.0146706)
Supplement: S2 Table — (XLSX) [file pone.0146706.s006.xlsx]

## Sheet: CCS_Euks
SRR629986.483930
SRR629986.470409
SRR629986.436602
SRR629986.361750
SRR629986.236185
SRR629986.212558
SRR629982.584053
SRR629982.466718
SRR629982.441098
SRR629982.352163
SRR629982.218128
SRR629982.160222
SRR629982.149833
SRR629982.103896
SRR629982.81133
SRR629982.68312
SRR629978.211519
SRR629978.197129
SRR629978.189188
SRR629978.167872
SRR629978.149198
SRR629978.128764
SRR629978.113981
SRR629978.89148
SRR629978.73508
SRR629974.604691
SRR629974.563641
SRR629974.421015
SRR629974.302665
SRR629974.268900
SRR629974.221710
SRR629974.215333
SRR629974.171912
SRR629974.90505
SRR629989.589930
SRR629989.539699
SRR629989.64655
SRR629985.34972
SRR629981.578412
SRR629981.552149
SRR629981.513706
SRR629981.458108
SRR629981.439929
SRR629981.420413
SRR629981.368689
SRR629981.367579
SRR629981.364399
SRR629981.239535
SRR629981.220207
SRR629981.86358
SRR629977.665941
SRR629977.661513
SRR629977.649188
SRR629977.623271
SRR629977.581442
SRR629977.555560
SRR629977.546027
SRR629977.539396
SRR629977.533470
SRR629977.506304
SRR629977.445962
SRR629977.437532
SRR629977.423428
SRR629977.336948
SRR629977.305608
SRR629977.299199
SRR629977.288925
SRR629977.284749
SRR629977.230653
SRR629977.228855
SRR629977.213246
SRR629977.161258
SRR629977.154542
SRR629977.150398
SRR629977.125807
SRR629977.124220
SRR629977.98630
SRR629977.88471
SRR629977.77853
SRR629977.70246
SRR629977.57796
SRR629977.53757
SRR629977.49073
SRR629977.42493
SRR629977.37204
SRR629977.25141
SRR629977.23365
SRR629977.20401
SRR629977.6805
SRR629973.233147
SRR629973.99789
SRR629980.230600
SRR629980.228576
SRR629980.200955
SRR629980.192870
SRR629980.136805
SRR629980.126900
SRR629980.108367
SRR629980.92489
SRR629980.86742
SRR629976.435973
SRR629976.216879
SRR629972.73133
SRR629987.388135
SRR629979.244808
SRR629979.203155
SRR629979.139212
SRR629979.125091
SRR629979.78045
SRR629979.44750
SRR629979.26620
SRR629979.23623
SRR629975.128848
SRR629971.476646
SRR629971.9364
SRR629971.5037
SRR629981.309926
SRR629979.43753
SRR629979.9237
SRR629979.4276
SRR629974.551824
SRR629987.654090
SRR629979.79381
SRR629986.415506
SRR629986.295945
SRR629986.269079
SRR629986.216720
SRR629986.188854
SRR629986.124869
SRR629986.72869
SRR629986.66179
SRR629982.604972
SRR629982.590909
SRR629982.562867
SRR629982.425022
SRR629982.347196
SRR629982.330464
SRR629982.295249
SRR629982.212045
SRR629982.140290
SRR629982.128766
SRR629982.92532
SRR629982.86545
SRR629982.81370
SRR629982.68728
SRR629982.54548
SRR629982.15642
SRR629982.14975
SRR629978.219136
SRR629978.215266
SRR629978.177426
SRR629978.155985
SRR629978.134661
SRR629978.101491
SRR629978.91835
SRR629978.58860
SRR629978.51911
SRR629978.851
SRR629974.733392
SRR629974.701532
SRR629974.697232
SRR629974.692232
SRR629974.670766
SRR629974.654278
SRR629974.591470
SRR629974.570367
SRR629974.553772
SRR629974.526957
SRR629974.502813
SRR629974.464236
SRR629974.461232
SRR629974.442445
SRR629974.431255
SRR629974.392653
SRR629974.362688
SRR629974.358509
SRR629974.337231
SRR629974.327462
SRR629974.327395
SRR629974.309347
SRR629974.304915
SRR629974.190391
SRR629974.124869
SRR629974.104070
SRR629974.91626
SRR629974.91476
SRR629974.84515
SRR629974.34158
SRR629974.13274
SRR629989.572051
SRR629989.558484
SRR629989.537666
SRR629989.429744
SRR629989.418115
SRR629989.414026
SRR629989.413310
SRR629989.401085
SRR629989.396305
SRR629989.385013
SRR629989.348036
SRR629989.345283
SRR629989.327473
SRR629989.314135
SRR629989.186076
SRR629989.185838
SRR629989.129395
SRR629989.112851
SRR629989.22412
SRR629985.120739
SRR629985.91873
SRR629981.600826
SRR629981.472470
SRR629981.423031
SRR629981.328234
SRR629981.297488
SRR629981.280490
SRR629981.269822
SRR629981.253159
SRR629981.199451
SRR629981.190219
SRR629981.186952
SRR629981.118325
SRR629981.80041
SRR629981.58983
SRR629981.44805
SRR629981.26661
SRR629981.12136
SRR629977.633620
SRR629977.625714
SRR629977.605308
SRR629977.591688
SRR629977.577056
SRR629977.572731
SRR629977.565585
SRR629977.553191
SRR629977.548866
SRR629977.533717
SRR629977.510424
SRR629977.507319
SRR629977.496401
SRR629977.493237
SRR629977.489888
SRR629977.452082
SRR629977.447873
SRR629977.444307
SRR629977.441565
SRR629977.429387
SRR629977.418295
SRR629977.416130
SRR629977.404686
SRR629977.396413
SRR629977.390926
SRR629977.390608
SRR629977.386216
SRR629977.384803
SRR629977.384244
SRR629977.383200
SRR629977.366435
SRR629977.364536
SRR629977.358110
SRR629977.341289
SRR629977.320900
SRR629977.313185
SRR629977.309565
SRR629977.302567
SRR629977.295157
SRR629977.290066
SRR629977.285183
SRR629977.281666
SRR629977.281241
SRR629977.278130
SRR629977.271365
SRR629977.211580
SRR629977.210583
SRR629977.193377
SRR629977.186832
SRR629977.158362
SRR629977.142774
SRR629977.118860
SRR629977.117617
SRR629977.111345
SRR629977.107237
SRR629977.105415
SRR629977.83910
SRR629977.64105
SRR629973.575392
SRR629973.540071
SRR629973.506122
SRR629973.392625
SRR629973.323219
SRR629973.172748
SRR629973.30302
SRR629988.163689
SRR629988.67865
SRR629984.387041
SRR629984.318907
SRR629980.265444
SRR629980.255519
SRR629980.245127
SRR629980.224484
SRR629980.221003
SRR629980.208152
SRR629980.164381
SRR629980.162360
SRR629980.155472
SRR629980.145016
SRR629980.134263
SRR629980.127389
SRR629980.125480
SRR629980.125126
SRR629980.107583
SRR629980.102471
SRR629980.99080
SRR629980.90235
SRR629980.82939
SRR629980.66971
SRR629980.61312
SRR629980.44305
SRR629980.42226
SRR629980.32400
SRR629980.15264
SRR629976.654579
SRR629976.641673
SRR629976.455848
SRR629976.441356
SRR629976.353504
SRR629976.190966
SRR629976.127874
SRR629976.15849
SRR629972.568215
SRR629972.204746
SRR629972.98133
SRR629987.403239
SRR629987.381899
SRR629987.345641
SRR629987.343321
SRR629987.147796
SRR629987.114706
SRR629987.85743
SRR629983.58017
SRR629979.209553
SRR629979.205204
SRR629979.203248
SRR629979.202885
SRR629979.193402
SRR629979.175175
SRR629979.156279
SRR629979.145537
SRR629979.143560
SRR629979.140645
SRR629979.127471
SRR629979.119631
SRR629979.115727
SRR629979.115587
SRR629979.113698
SRR629979.108355
SRR629979.107334
SRR629979.96329
SRR629979.96321
SRR629979.91621
SRR629979.90061
SRR629979.76110
SRR629979.74555
SRR629979.73013
SRR629979.62808
SRR629979.54438
SRR629979.47649
SRR629979.45820
SRR629979.44119
SRR629979.44037
SRR629979.40195
SRR629979.34871
SRR629979.28910
SRR629979.27447
SRR629979.21822
SRR629975.149537
SRR629975.144034
SRR629975.109064
SRR629975.97490
SRR629975.95685
SRR629975.33014
SRR629975.26561
SRR629975.16708
SRR629971.440524
SRR629971.439717
SRR629971.409999
SRR629971.253372
SRR629986.533369
SRR629981.550022
SRR629979.107883
SRR629977.620582
SRR629981.541108
SRR629988.109269
SRR629986.503612
SRR629986.497580
SRR629986.346503
SRR629986.110166
SRR629982.582435
SRR629982.484037
SRR629982.266771
SRR629982.216636
SRR629982.13239
SRR629978.241629
SRR629978.162311
SRR629978.157822
SRR629978.80850
SRR629978.50924
SRR629978.10948
SRR629974.680315
SRR629974.577052
SRR629974.452761
SRR629974.388026
SRR629974.361461
SRR629974.314790
SRR629974.271051
SRR629974.249689
SRR629974.247422
SRR629974.151870
SRR629974.109417
SRR629974.107251
SRR629989.553730
SRR629989.536666
SRR629989.511114
SRR629989.508029
SRR629989.500029
SRR629989.498980
SRR629989.448197
SRR629989.409641
SRR629989.403264
SRR629989.334760
SRR629989.205123
SRR629981.386953
SRR629981.282802
SRR629981.279951
SRR629981.183128
SRR629981.10495
SRR629977.671114
SRR629977.638142
SRR629977.634511
SRR629977.573453
SRR629977.537535
SRR629977.499118
SRR629977.498649
SRR629977.489591
SRR629977.353392
SRR629977.177943
SRR629977.136955
SRR629977.134404
SRR629977.52033
SRR629973.489855
SRR629973.416319
SRR629988.164567
SRR629988.34135
SRR629984.537164
SRR629980.240987
SRR629980.235099
SRR629980.226783
SRR629980.176646
SRR629980.146057
SRR629980.71507
SRR629976.617031
SRR629976.413525
SRR629976.407317
SRR629976.356934
SRR629976.286792
SRR629976.199256
SRR629972.637987
SRR629972.485940
SRR629972.382465
SRR629972.336846
SRR629972.108735
SRR629987.576070
SRR629983.242476
SRR629983.131585
SRR629979.180181
SRR629979.41120
SRR629979.14708
SRR629975.212090
SRR629975.210951
SRR629975.197209
SRR629975.192618
SRR629975.168065
SRR629975.140971
SRR629975.96691
SRR629975.69202
SRR629975.30939
SRR629971.653305
SRR629971.274472
SRR629974.356512
SRR629979.179399
SRR629974.346457
SRR629986.433788
SRR629986.427953
SRR629986.376588
SRR629986.362258
SRR629986.327691
SRR629986.308766
SRR629986.303642
SRR629986.281606
SRR629986.281377
SRR629986.162155
SRR629986.56837
SRR629986.54907
SRR629986.39737
SRR629982.572046
SRR629982.535518
SRR629982.535258
SRR629982.276088
SRR629982.268594
SRR629982.172344
SRR629982.134917
SRR629982.74627
SRR629982.10359
SRR629978.206537
SRR629978.194916
SRR629978.141391
SRR629978.129033
SRR629978.101550
SRR629978.83840
SRR629978.38108
SRR629974.743509
SRR629974.715498
SRR629974.712255
SRR629974.708518
SRR629974.624738
SRR629974.623479
SRR629974.578291
SRR629974.539956
SRR629974.513059
SRR629974.512124
SRR629974.500119
SRR629974.488930
SRR629974.480750
SRR629974.456570
SRR629974.395278
SRR629974.344769
SRR629974.322777
SRR629974.313871
SRR629974.307107
SRR629974.282811
SRR629974.276827
SRR629974.274704
SRR629974.248459
SRR629974.162985
SRR629974.142007
SRR629974.109227
SRR629974.81984
SRR629989.616504
SRR629989.586658
SRR629989.555508
SRR629989.513628
SRR629989.410038
SRR629989.199799
SRR629989.197635
SRR629989.174065
SRR629989.130318
SRR629989.126610
SRR629981.596342
SRR629981.469117
SRR629981.452605
SRR629981.420749
SRR629981.380928
SRR629981.375228
SRR629981.318146
SRR629981.238930
SRR629977.689105
SRR629977.686572
SRR629977.684714
SRR629977.682150
SRR629977.651036
SRR629977.640115
SRR629977.639539
SRR629977.637637
SRR629977.636570
SRR629977.633098
SRR629977.621107
SRR629977.620983
SRR629977.615335
SRR629977.607068
SRR629977.589605
SRR629977.578708
SRR629977.572684
SRR629977.572612
SRR629977.567563
SRR629977.542888
SRR629977.539928
SRR629977.536078
SRR629977.523500
SRR629977.519373
SRR629977.471470
SRR629977.421906
SRR629977.420875
SRR629977.412433
SRR629977.396976
SRR629977.394132
SRR629977.389250
SRR629977.338424
SRR629977.333043
SRR629977.329367
SRR629977.309990
SRR629977.305515
SRR629977.294718
SRR629977.250640
SRR629977.235110
SRR629977.219665
SRR629977.165932
SRR629977.106724
SRR629977.92323
SRR629977.90189
SRR629977.78756
SRR629977.62085
SRR629977.55969
SRR629977.55848
SRR629977.30980
SRR629977.27401
SRR629973.571701
SRR629988.94243
SRR629988.64505
SRR629988.28631
SRR629984.560568
SRR629984.392169
SRR629984.145503
SRR629980.210724
SRR629980.160438
SRR629980.151336
SRR629980.139134
SRR629980.128577
SRR629980.128068
SRR629980.117684
SRR629980.97089
SRR629980.96557
SRR629980.95276
SRR629980.89718
SRR629980.88257
SRR629980.78122
SRR629980.77797
SRR629980.76614
SRR629980.74075
SRR629980.51869
SRR629980.51785
SRR629980.51512
SRR629980.29419
SRR629976.414715
SRR629976.264189
SRR629976.224026
SRR629976.215156
SRR629976.175463
SRR629976.53848
SRR629976.51000
SRR629972.684038
SRR629972.479697
SRR629987.602369
SRR629987.495186
SRR629983.497918
SRR629983.398817
SRR629983.163438
SRR629983.121923
SRR629979.246560
SRR629979.228991
SRR629979.222311
SRR629979.221059
SRR629979.196520
SRR629979.184828
SRR629979.184062
SRR629979.164152
SRR629979.161832
SRR629979.153760
SRR629979.145216
SRR629979.127554
SRR629979.124799
SRR629979.118307
SRR629979.104179
SRR629979.69201
SRR629979.58030
SRR629979.6406
SRR629975.218865
SRR629975.196412
SRR629975.100306
SRR629975.89414
SRR629975.41266
SRR629975.3458
SRR629971.210033
SRR629983.510295
SRR629978.212293
SRR629978.180216
SRR629978.173444
SRR629978.156809
SRR629978.50914
SRR629974.573138
SRR629974.562677
SRR629974.162319
SRR629989.95832
SRR629989.47687
SRR629981.564763
SRR629981.493701
SRR629981.446795
SRR629981.339127
SRR629981.306417
SRR629981.107798
SRR629977.651415
SRR629977.603861
SRR629977.596159
SRR629977.575906
SRR629977.569093
SRR629977.564586
SRR629977.547655
SRR629977.400173
SRR629977.396826
SRR629977.352768
SRR629977.328188
SRR629977.276277
SRR629977.215290
SRR629977.129868
SRR629977.68274
SRR629988.157656
SRR629988.26531
SRR629980.225251
SRR629980.198711
SRR629980.56633
SRR629980.14642
SRR629980.14488
SRR629980.6256
SRR629976.509303
SRR629976.472522
SRR629972.149149
SRR629987.649601
SRR629987.532715
SRR629979.248807
SRR629979.246287
SRR629979.238688
SRR629979.215648
SRR629975.198170
SRR629975.176638
SRR629975.80679
SRR629971.677830
SRR629971.646172
SRR629971.581104
SRR629971.431909
SRR629971.63462
SRR629985.179016
SRR629979.78133
SRR629974.737262
SRR629974.381270
SRR629986.211703
SRR629986.52683
SRR629982.590216
SRR629982.582722
SRR629982.573545
SRR629982.573471
SRR629982.560097
SRR629982.493477
SRR629982.471617
SRR629982.447726
SRR629982.412660
SRR629982.372722
SRR629982.352273
SRR629982.344524
SRR629982.333903
SRR629982.326185
SRR629982.312767
SRR629982.296100
SRR629982.293537
SRR629982.257626
SRR629982.208705
SRR629982.164489
SRR629982.128721
SRR629982.85759
SRR629982.85271
SRR629982.79272
SRR629982.34702
SRR629978.218104
SRR629978.213324
SRR629978.204845
SRR629978.201444
SRR629978.193941
SRR629978.188809
SRR629978.186904
SRR629978.181904
SRR629978.171419
SRR629978.162729
SRR629978.162523
SRR629978.161814
SRR629978.156070
SRR629978.149650
SRR629978.142129
SRR629978.133896
SRR629978.132560
SRR629978.131425
SRR629978.130906
SRR629978.117335
SRR629978.115645
SRR629978.112132
SRR629978.111871
SRR629978.108608
SRR629978.70084
SRR629978.50550
SRR629978.39535
SRR629978.25557
SRR629978.18666
SRR629974.723436
SRR629974.715432
SRR629974.702090
SRR629974.633504
SRR629974.602742
SRR629974.589767
SRR629974.587455
SRR629974.534055
SRR629974.488062
SRR629974.475999
SRR629974.453066
SRR629974.440382
SRR629974.396910
SRR629974.324338
SRR629974.301327
SRR629974.286287
SRR629974.266849
SRR629974.264375
SRR629974.252730
SRR629974.214325
SRR629974.165559
SRR629974.112121
SRR629974.49571
SRR629974.17019
SRR629989.582435
SRR629989.546229
SRR629989.523202
SRR629989.505463
SRR629989.480638
SRR629989.474528
SRR629989.413240
SRR629989.362018
SRR629989.290062
SRR629989.288895
SRR629989.246133
SRR629989.236684
SRR629989.203886
SRR629989.21093
SRR629985.210273
SRR629985.198904
SRR629985.109556
SRR629985.84979
SRR629985.84130
SRR629981.585674
SRR629981.582947
SRR629981.542516
SRR629981.528960
SRR629981.521459
SRR629981.489889
SRR629981.471308
SRR629981.457169
SRR629981.455270
SRR629981.384765
SRR629981.380774
SRR629981.322988
SRR629981.315490
SRR629981.305135
SRR629981.297975
SRR629981.235218
SRR629981.235028
SRR629981.221437
SRR629981.203809
SRR629981.190949
SRR629981.172874
SRR629981.150601
SRR629981.124817
SRR629981.120218
SRR629981.109806
SRR629977.683841
SRR629977.668588
SRR629977.667985
SRR629977.644212
SRR629977.642883
SRR629977.621768
SRR629977.614475
SRR629977.613263
SRR629977.612108
SRR629977.609481
SRR629977.604203
SRR629977.598340
SRR629977.572010
SRR629977.563863
SRR629977.557754
SRR629977.534001
SRR629977.533483
SRR629977.531600
SRR629977.522040
SRR629977.501968
SRR629977.498071
SRR629977.488924
SRR629977.486634
SRR629977.477855
SRR629977.472343
SRR629977.460979
SRR629977.450584
SRR629977.445600
SRR629977.435325
SRR629977.423520
SRR629977.419240
SRR629977.414872
SRR629977.409998
SRR629977.394715
SRR629977.391110
SRR629977.383273
SRR629977.378102
SRR629977.374755
SRR629977.369051
SRR629977.364617
SRR629977.350156
SRR629977.334712
SRR629977.331395
SRR629977.320158
SRR629977.307013
SRR629977.304067
SRR629977.295888
SRR629977.286052
SRR629977.281750
SRR629977.274098
SRR629977.269538
SRR629977.268889
SRR629977.268609
SRR629977.262313
SRR629977.260775
SRR629977.242356
SRR629977.237532
SRR629977.214525
SRR629977.212538
SRR629977.181815
SRR629977.176315
SRR629977.167954
SRR629977.128710
SRR629977.104761
SRR629977.91098
SRR629977.52375
SRR629977.44210
SRR629977.35942
SRR629977.30070
SRR629973.353305
SRR629973.340930
SRR629973.315865
SRR629973.250297
SRR629973.229241
SRR629973.206580
SRR629988.74664
SRR629988.47573
SRR629988.44283
SRR629988.39986
SRR629988.25668
SRR629984.389062
SRR629984.187485
SRR629980.243709
SRR629980.243298
SRR629980.230745
SRR629980.220663
SRR629980.220018
SRR629980.217147
SRR629980.214628
SRR629980.183744
SRR629980.175504
SRR629980.174510
SRR629980.172950
SRR629980.144597
SRR629980.134792
SRR629980.122471
SRR629980.120134
SRR629980.116277
SRR629980.82423
SRR629980.82413
SRR629980.74723
SRR629980.71539
SRR629980.64805
SRR629980.64541
SRR629980.61887
SRR629980.49588
SRR629980.40198
SRR629980.35749
SRR629980.22654
SRR629980.18933
SRR629980.8689
SRR629980.2588
SRR629976.497987
SRR629976.470596
SRR629976.390464
SRR629976.381833
SRR629976.329375
SRR629976.301449
SRR629976.277899
SRR629976.205274
SRR629976.192900
SRR629976.163661
SRR629976.147619
SRR629976.136957
SRR629976.56747
SRR629976.19257
SRR629976.5517
SRR629972.613923
SRR629972.521957
SRR629972.6046
SRR629987.623945
SRR629987.611703
SRR629987.585426
SRR629987.551922
SRR629987.497823
SRR629987.433523
SRR629987.347611
SRR629987.345754
SRR629987.319835
SRR629987.311331
SRR629987.310397
SRR629987.252528
SRR629987.235870
SRR629987.186570
SRR629987.85212
SRR629983.391430
SRR629983.295314
SRR629983.189089
SRR629983.89966
SRR629979.252951
SRR629979.248477
SRR629979.232416
SRR629979.231970
SRR629979.196421
SRR629979.193436
SRR629979.184968
SRR629979.172440
SRR629979.164116
SRR629979.159915
SRR629979.158229
SRR629979.155816
SRR629979.137588
SRR629979.135011
SRR629979.113583
SRR629979.112106
SRR629979.101117
SRR629979.94152
SRR629979.91705
SRR629979.82866
SRR629979.79694
SRR629979.75598
SRR629979.72463
SRR629979.71270
SRR629979.58990
SRR629979.45105
SRR629979.18356
SRR629979.12957
SRR629979.12026
SRR629975.221621
SRR629975.171965
SRR629975.162770
SRR629975.60827
SRR629975.18013
SRR629971.635810
SRR629971.591435
SRR629971.497040
SRR629971.437321
SRR629971.405980
SRR629971.329549
SRR629971.316395
SRR629971.290777
SRR629971.274637
SRR629971.266512
SRR629971.223048
SRR629971.189772
SRR629971.177491
SRR629971.120711
SRR629971.69895
SRR629971.57375
SRR629971.20960
SRR629971.17438
SRR629981.335557
SRR629986.441564
SRR629981.549771
SRR629980.116483
SRR629980.108854
SRR629983.431267
SRR629978.243615
SRR629978.115041
SRR629977.465935
SRR629977.359383
SRR629987.167245
SRR629975.96338
SRR629989.281138
SRR629981.261059
SRR629977.690398
SRR629977.690380
SRR629983.448412
SRR629979.170878
SRR629986.92809
SRR629980.260875
SRR629980.33852
SRR629971.667364
SRR629978.76920
SRR629987.599376
SRR629979.18670
SRR629977.157171
SRR629978.162972
SRR629989.293385
SRR629977.285474
SRR629980.88323
SRR629976.309526
SRR629976.180841
SRR629980.242080
SRR629979.111475
SRR629974.249325
SRR629974.58153
SRR629989.116536
SRR629977.639290
SRR629977.310257
SRR629973.602758
SRR629973.490020
SRR629980.221384
SRR629976.144681
SRR629983.44897
SRR629975.164899
SRR629972.596322
SRR629977.410299
SRR629986.416810
SRR629982.285616
SRR629974.707775
SRR629974.426217
SRR629974.376231
SRR629974.180531
SRR629974.166048
SRR629981.474638
SRR629981.236858
SRR629977.627648
SRR629977.574102
SRR629977.245728
SRR629977.131995
SRR629977.22127
SRR629977.17072
SRR629980.228224
SRR629980.104175
SRR629980.60103
SRR629980.34633
SRR629987.9166
SRR629987.2735
SRR629987.1137
SRR629971.445696
SRR629982.293610
SRR629978.94966
SRR629981.35357
SRR629977.652370
SRR629977.492762
SRR629974.569710
SRR629986.514777
SRR629986.440911
SRR629986.277568
SRR629986.209966
SRR629982.187140
SRR629978.177647
SRR629978.30733
SRR629974.610550
SRR629974.6767
SRR629989.124707
SRR629981.264517
SRR629977.433424
SRR629977.423538
SRR629977.326406
SRR629977.222039
SRR629977.168383
SRR629988.13695
SRR629980.179334
SRR629980.94261
SRR629976.90876
SRR629987.348282
SRR629979.240535
SRR629979.100368
SRR629979.85422
SRR629975.64750
SRR629975.40702
SRR629975.34272
SRR629981.141204
SRR629977.499739
SRR629982.221857
SRR629978.185247
SRR629978.88656
SRR629974.621407
SRR629985.235425
SRR629980.248450
SRR629972.26225
SRR629987.603763
SRR629979.71873
SRR629978.229331
SRR629973.356112
SRR629984.137921
SRR629987.461184
SRR629987.365078
SRR629982.340835
SRR629978.197486
SRR629978.107646
SRR629978.68350
SRR629977.332417
SRR629973.444010
SRR629977.487093
SRR629977.369183
SRR629977.344326
SRR629976.421679
SRR629976.339817
SRR629976.275899
SRR629987.442109
SRR629979.135193
SRR629975.173245
SRR629971.687991
SRR629971.675825
SRR629971.594772
SRR629971.138419
SRR629974.475778
SRR629981.123011
SRR629981.88363
SRR629977.172662
SRR629980.42221
SRR629976.208268
SRR629976.27244
SRR629972.709566
SRR629979.230702
SRR629980.240185
SRR629986.184429
SRR629982.111820
SRR629988.162267
SRR629976.525725
SRR629987.640518
SRR629976.155165
SRR629981.303123
SRR629973.376873
SRR629976.493104
SRR629983.185888
SRR629975.242226
SRR629971.280437
SRR629974.369884
SRR629989.436478
SRR629989.188652
SRR629981.82301
SRR629977.306264
SRR629973.92261
SRR629973.50354
SRR629976.579812
SRR629976.474070
SRR629976.446189
SRR629976.364014
SRR629987.397820
SRR629983.167591
SRR629971.452790
SRR629971.389202
SRR629988.59760
SRR629986.262921
SRR629974.551450
SRR629974.519023
SRR629974.279913
SRR629989.489271
SRR629989.159007
SRR629984.14067
SRR629987.631191
SRR629987.347900
SRR629987.266504
SRR629987.199610
SRR629979.196500
SRR629975.124804
SRR629975.123914
SRR629975.80443
SRR629978.109803
SRR629986.236587
SRR629982.608998
SRR629982.582869
SRR629982.231562
SRR629982.66677
SRR629978.212887
SRR629978.174641
SRR629978.164215
SRR629978.152686
SRR629978.104228
SRR629978.55482
SRR629974.719332
SRR629974.677275
SRR629974.668312
SRR629974.649620
SRR629974.614874
SRR629974.580030
SRR629974.368051
SRR629974.322888
SRR629974.317616
SRR629974.191120
SRR629974.175237
SRR629974.104949
SRR629985.234455
SRR629985.114283
SRR629985.87431
SRR629985.69467
SRR629981.407970
SRR629981.218705
SRR629977.681832
SRR629977.675094
SRR629977.663147
SRR629977.594879
SRR629977.548981
SRR629977.518246
SRR629977.411161
SRR629977.388029
SRR629977.371984
SRR629977.347444
SRR629977.292193
SRR629977.275204
SRR629977.261599
SRR629977.248239
SRR629977.234987
SRR629977.198345
SRR629977.111463
SRR629977.78265
SRR629977.67687
SRR629977.7987
SRR629988.120332
SRR629980.231330
SRR629980.190956
SRR629980.176930
SRR629980.145809
SRR629980.95836
SRR629980.71387
SRR629980.58897
SRR629980.47545
SRR629976.597248
SRR629976.526516
SRR629976.260903
SRR629976.146594
SRR629976.38187
SRR629972.669560
SRR629972.223257
SRR629987.622930
SRR629987.492539
SRR629983.566316
SRR629983.395444
SRR629979.206506
SRR629979.199296
SRR629979.183461
SRR629979.174073
SRR629979.163780
SRR629979.146324
SRR629979.130438
SRR629979.130014
SRR629979.87719
SRR629979.57527
SRR629975.101767
SRR629975.55681
SRR629975.34495
SRR629971.254598
SRR629971.51994
SRR629986.357475
SRR629986.262083
SRR629989.472502
SRR629981.479280
SRR629977.407845
SRR629976.566952
SRR629976.77450
SRR629971.115314
SRR629986.148136
SRR629976.566360
SRR629977.460233
SRR629977.515298
SRR629973.199210
SRR629973.99840
SRR629976.324932
SRR629976.314983
SRR629971.128406
SRR629981.130728
SRR629986.260348
SRR629982.148262
SRR629982.128579
SRR629978.52097
SRR629985.209094
SRR629981.315791
SRR629977.533050
SRR629973.170583
SRR629984.480597
SRR629984.186708
SRR629972.279459
SRR629987.572076
SRR629987.243119
SRR629979.168570
SRR629979.5516
SRR629979.4570
SRR629984.537960
SRR629974.722796
SRR629974.577779
SRR629980.245389
SRR629980.207673
SRR629979.108835
SRR629979.37432
SRR629977.265493
SRR629977.13533
SRR629982.254974
SRR629985.143332
SRR629977.431666
SRR629977.196398
SRR629984.543359
SRR629976.479923
SRR629976.305508
SRR629976.167673
SRR629987.258137
SRR629987.94817
SRR629987.90773
SRR629987.61934
SRR629987.12029
SRR629987.4042
SRR629979.87842
SRR629971.348674
SRR629981.402226
SRR629977.585571
SRR629988.102704
SRR629972.305393
SRR629974.603153
SRR629985.127720
SRR629989.180889
SRR629986.508918
SRR629986.470266
SRR629986.442558
SRR629986.437433
SRR629986.434915
SRR629986.331395
SRR629986.324715
SRR629986.319301
SRR629986.316761
SRR629986.289659
SRR629986.233700
SRR629986.218685
SRR629986.175202
SRR629986.171509
SRR629986.170327
SRR629986.162620
SRR629986.158198
SRR629986.142897
SRR629986.136105
SRR629986.127849
SRR629986.118134
SRR629986.100823
SRR629986.96793
SRR629986.87623
SRR629986.67756
SRR629986.56123
SRR629986.48756
SRR629986.24803
SRR629986.2554
SRR629982.601689
SRR629982.584395
SRR629982.580739
SRR629982.493215
SRR629982.482817
SRR629982.479103
SRR629982.454463
SRR629982.444397
SRR629982.404288
SRR629982.402637
SRR629982.365905
SRR629982.358595
SRR629982.341852
SRR629982.324714
SRR629982.322822
SRR629982.321352
SRR629982.309356
SRR629982.300208
SRR629982.297915
SRR629982.286293
SRR629982.255279
SRR629982.250016
SRR629982.245049
SRR629982.205005
SRR629982.171434
SRR629982.170830
SRR629982.144285
SRR629982.127738
SRR629982.116736
SRR629982.109130
SRR629982.108108
SRR629982.107316
SRR629982.90958
SRR629982.69233
SRR629982.58799
SRR629982.27499
SRR629982.24349
SRR629978.245851
SRR629978.199806
SRR629978.173228
SRR629978.148921
SRR629978.136583
SRR629978.119927
SRR629978.112432
SRR629978.109825
SRR629978.103946
SRR629978.42905
SRR629978.28736
SRR629978.14488
SRR629974.743438
SRR629974.693469
SRR629974.635331
SRR629974.631954
SRR629974.631104
SRR629974.617134
SRR629974.601606
SRR629974.574509
SRR629974.537519
SRR629974.433124
SRR629974.425664
SRR629974.389005
SRR629974.323333
SRR629974.306554
SRR629974.266140
SRR629974.199422
SRR629974.169434
SRR629974.109591
SRR629989.595310
SRR629989.587500
SRR629989.568660
SRR629989.568606
SRR629989.563324
SRR629989.544712
SRR629989.526277
SRR629989.447626
SRR629989.416631
SRR629989.405407
SRR629989.397865
SRR629989.372190
SRR629989.359948
SRR629989.349860
SRR629989.272126
SRR629989.269498
SRR629989.243293
SRR629989.238445
SRR629989.224058
SRR629989.218828
SRR629989.213393
SRR629989.189051
SRR629989.174430
SRR629989.162415
SRR629989.146260
SRR629989.136798
SRR629989.136735
SRR629989.135060
SRR629989.128562
SRR629989.108439
SRR629989.91629
SRR629989.91414
SRR629989.63712
SRR629985.211618
SRR629985.204135
SRR629985.185307
SRR629985.173863
SRR629985.159416
SRR629985.135671
SRR629985.132151
SRR629985.120303
SRR629985.48785
SRR629985.35048
SRR629985.18780
SRR629981.455132
SRR629981.445274
SRR629981.444110
SRR629981.333273
SRR629981.245864
SRR629981.230834
SRR629981.210849
SRR629981.198107
SRR629981.191939
SRR629981.160015
SRR629981.143348
SRR629981.139064
SRR629981.50481
SRR629977.679233
SRR629977.673660
SRR629977.673394
SRR629977.588897
SRR629977.562502
SRR629977.550187
SRR629977.513831
SRR629977.507463
SRR629977.485999
SRR629977.482540
SRR629977.455595
SRR629977.449027
SRR629977.446635
SRR629977.419635
SRR629977.386584
SRR629977.374654
SRR629977.357623
SRR629977.351567
SRR629977.343914
SRR629977.223043
SRR629977.210820
SRR629977.193267
SRR629977.182189
SRR629977.181121
SRR629977.162297
SRR629977.95289
SRR629977.84154
SRR629977.68110
SRR629977.57489
SRR629977.53526
SRR629977.36782
SRR629977.16200
SRR629973.608194
SRR629973.511574
SRR629973.481517
SRR629973.469923
SRR629973.303121
SRR629973.220410
SRR629973.200798
SRR629973.187367
SRR629973.144636
SRR629988.150751
SRR629988.132637
SRR629988.126949
SRR629988.125424
SRR629988.118464
SRR629988.112544
SRR629988.93394
SRR629988.81779
SRR629988.80989
SRR629988.78275
SRR629988.74507
SRR629988.53489
SRR629988.29883
SRR629988.16607
SRR629988.3321
SRR629988.809
SRR629984.714530
SRR629984.709483
SRR629984.649200
SRR629984.624314
SRR629984.588631
SRR629984.575809
SRR629984.522409
SRR629984.520456
SRR629984.510552
SRR629984.440213
SRR629984.420548
SRR629984.361611
SRR629984.328276
SRR629984.319222
SRR629984.311431
SRR629984.307620
SRR629984.302026
SRR629984.300674
SRR629984.289129
SRR629984.242815
SRR629984.211745
SRR629984.198415
SRR629984.135635
SRR629984.114414
SRR629984.109880
SRR629984.95740
SRR629984.86846
SRR629984.68481
SRR629984.29148
SRR629984.20542
SRR629980.266907
SRR629980.261802
SRR629980.250210
SRR629980.221263
SRR629980.206588
SRR629980.165553
SRR629980.144261
SRR629980.141608
SRR629980.131901
SRR629980.91409
SRR629980.90832
SRR629980.34625
SRR629980.30985
SRR629980.27455
SRR629980.25662
SRR629980.20570
SRR629980.16708
SRR629980.16179
SRR629980.13494
SRR629980.5868
SRR629980.1060
SRR629976.643621
SRR629976.626082
SRR629976.582998
SRR629976.557821
SRR629976.533203
SRR629976.510120
SRR629976.467095
SRR629976.447283
SRR629976.358407
SRR629976.345004
SRR629976.315873
SRR629976.310879
SRR629976.294812
SRR629976.284683
SRR629976.191297
SRR629976.163917
SRR629976.93019
SRR629976.51271
SRR629972.484171
SRR629972.463278
SRR629972.442793
SRR629972.378637
SRR629972.146118
SRR629972.125740
SRR629972.56657
SRR629987.654144
SRR629987.631664
SRR629987.618377
SRR629987.566633
SRR629987.559332
SRR629987.558582
SRR629987.555097
SRR629987.532151
SRR629987.530372
SRR629987.526694
SRR629987.513132
SRR629987.494784
SRR629987.492431
SRR629987.471705
SRR629987.425191
SRR629987.409724
SRR629987.400435
SRR629987.396303
SRR629987.358260
SRR629987.318490
SRR629987.258140
SRR629987.248064
SRR629987.242875
SRR629987.218596
SRR629987.212831
SRR629987.206391
SRR629987.171774
SRR629987.163911
SRR629987.155792
SRR629987.127836
SRR629987.126947
SRR629987.122261
SRR629987.112804
SRR629987.81547
SRR629987.76803
SRR629987.59734
SRR629987.53819
SRR629987.35885
SRR629987.31019
SRR629987.25098
SRR629987.8891
SRR629987.7406
SRR629983.456369
SRR629983.451674
SRR629983.415239
SRR629983.408671
SRR629983.397586
SRR629983.371020
SRR629983.300492
SRR629983.254391
SRR629983.215285
SRR629983.183972
SRR629983.166907
SRR629983.34368
SRR629983.16583
SRR629983.9947
SRR629979.130605
SRR629979.84750
SRR629979.18200
SRR629975.189324
SRR629975.187549
SRR629975.155905
SRR629975.102153
SRR629975.42452
SRR629975.35834
SRR629971.606153
SRR629971.523477
SRR629971.462829
SRR629971.452676
SRR629971.431804
SRR629971.399412
SRR629971.366004
SRR629971.318852
SRR629971.310996
SRR629971.290416
SRR629971.284445
SRR629971.144446
SRR629987.360335
SRR629971.512145
SRR629973.484373
SRR629976.16842
SRR629987.126866
SRR629983.289995
SRR629983.276602
SRR629974.166255
SRR629981.547685
SRR629977.670924
SRR629977.633452
SRR629973.212777
SRR629984.313800
SRR629972.587306
SRR629972.438452
SRR629982.520574
SRR629981.605603
SRR629977.612989
SRR629984.357289
SRR629987.613473
SRR629983.377678
SRR629976.606956
SRR629984.498957
SRR629986.473942
SRR629986.468283
SRR629986.400686
SRR629986.353247
SRR629986.352916
SRR629986.326038
SRR629986.288709
SRR629986.235619
SRR629986.222110
SRR629986.221636
SRR629986.104915
SRR629986.67761
SRR629982.475654
SRR629982.373997
SRR629982.344334
SRR629982.322287
SRR629982.286592
SRR629982.147278
SRR629982.141243
SRR629982.87524
SRR629982.49474
SRR629982.28880
SRR629978.209577
SRR629978.207312
SRR629978.47734
SRR629978.17178
SRR629978.12336
SRR629978.6092
SRR629974.736478
SRR629974.660876
SRR629974.636700
SRR629974.546937
SRR629974.546808
SRR629974.474100
SRR629974.472429
SRR629974.456722
SRR629974.432976
SRR629974.366393
SRR629974.361138
SRR629974.350502
SRR629974.286466
SRR629974.280268
SRR629974.269832
SRR629974.240669
SRR629974.132731
SRR629974.122334
SRR629974.98830
SRR629989.613240
SRR629989.601486
SRR629989.536299
SRR629989.519048
SRR629989.513460
SRR629989.499335
SRR629989.483714
SRR629989.464051
SRR629989.451071
SRR629989.444643
SRR629989.357718
SRR629989.321512
SRR629989.302757
SRR629989.283672
SRR629989.278153
SRR629989.269076
SRR629989.248252
SRR629989.213839
SRR629989.206418
SRR629989.133367
SRR629989.83768
SRR629989.81403
SRR629989.33131
SRR629985.184575
SRR629985.175665
SRR629985.173907
SRR629985.163468
SRR629985.94549
SRR629985.35035
SRR629985.18190
SRR629985.8176
SRR629981.570411
SRR629981.315452
SRR629981.313882
SRR629981.284236
SRR629981.280212
SRR629981.154034
SRR629981.136098
SRR629977.645988
SRR629977.635243
SRR629977.625253
SRR629977.610564
SRR629977.601088
SRR629977.590183
SRR629977.581498
SRR629977.520457
SRR629977.507458
SRR629977.506893
SRR629977.485481
SRR629977.452675
SRR629977.404561
SRR629977.397306
SRR629977.375296
SRR629977.354349
SRR629977.354283
SRR629977.321333
SRR629977.319266
SRR629977.299153
SRR629977.268781
SRR629977.122944
SRR629977.113726
SRR629977.110503
SRR629973.409518
SRR629973.294731
SRR629988.164422
SRR629988.149145
SRR629988.81180
SRR629988.47562
SRR629988.21996
SRR629984.700570
SRR629984.647012
SRR629984.550593
SRR629984.413735
SRR629984.370252
SRR629984.325859
SRR629984.292849
SRR629984.284558
SRR629984.254449
SRR629984.228006
SRR629984.223129
SRR629984.215976
SRR629984.199522
SRR629984.96485
SRR629980.230846
SRR629980.126697
SRR629980.124335
SRR629980.39033
SRR629980.15215
SRR629976.628071
SRR629976.591821
SRR629976.580992
SRR629976.573675
SRR629976.491490
SRR629976.485618
SRR629976.462673
SRR629976.436994
SRR629976.429430
SRR629976.358260
SRR629976.167556
SRR629976.33832
SRR629972.594383
SRR629972.583802
SRR629972.500637
SRR629972.309864
SRR629972.137198
SRR629987.573849
SRR629987.568404
SRR629987.554428
SRR629987.527023
SRR629987.524528
SRR629987.459376
SRR629987.443211
SRR629987.439270
SRR629987.435285
SRR629987.421721
SRR629987.411514
SRR629987.387535
SRR629987.321694
SRR629987.309934
SRR629987.257756
SRR629987.188242
SRR629987.181361
SRR629987.143275
SRR629987.121476
SRR629987.118255
SRR629987.108859
SRR629987.64403
SRR629987.22850
SRR629987.18822
SRR629983.503212
SRR629983.366902
SRR629983.361516
SRR629983.211216
SRR629983.150947
SRR629983.56799
SRR629979.205683
SRR629979.137456
SRR629975.236807
SRR629975.50106
SRR629975.8599
SRR629971.653126
SRR629971.558454
SRR629971.461272
SRR629986.298018
SRR629978.120049
SRR629985.185285
SRR629972.383960
SRR629986.506411
SRR629986.497389
SRR629986.478717
SRR629986.430932
SRR629986.392942
SRR629986.383157
SRR629986.377091
SRR629986.328254
SRR629986.284573
SRR629986.247830
[truncated: 9,482 more rows]

## Sheet: CCS_SAR11
SRR629981.253945
SRR629977.107153
SRR629981.556922
SRR629987.663026
SRR629982.499885
SRR629989.564161
SRR629973.25072
SRR629973.20421
SRR629971.417531
SRR629982.144480
SRR629978.96395
SRR629989.430581
SRR629989.289596
SRR629985.227141
SRR629985.193534
SRR629985.186594
SRR629981.461146
SRR629977.397358
SRR629977.334472
SRR629973.306055
SRR629976.661867
SRR629976.609469
SRR629976.455295
SRR629976.121385
SRR629972.275886
SRR629987.274200
SRR629983.440823
SRR629983.355333
SRR629975.47132
SRR629971.597210
SRR629981.88622
SRR629973.54170
SRR629976.557923
SRR629971.569679
SRR629977.166833
SRR629973.509764
SRR629973.502737
SRR629973.327988
SRR629973.245855
SRR629976.168787
SRR629983.356321
SRR629983.300776
SRR629983.292467
SRR629979.133967
SRR629971.135589
SRR629986.526574
SRR629983.456710
SRR629983.316853
SRR629983.90821
SRR629971.385970
SRR629983.115432
SRR629976.387526
SRR629971.197580
SRR629972.248515
SRR629976.237902
SRR629983.365315
SRR629971.162081
SRR629971.75769
SRR629971.54320
SRR629974.175426
SRR629983.340130
SRR629983.159228
SRR629976.546134
SRR629984.235843
SRR629976.610657
SRR629983.12390
SRR629971.540206
SRR629989.254070
SRR629981.438712
SRR629981.553409
SRR629972.114402
SRR629981.33571
SRR629984.645898
SRR629976.285145
SRR629976.198061
SRR629976.86876
SRR629972.697332
SRR629972.71027
SRR629983.243322
SRR629976.128584
SRR629984.173719
SRR629985.188209
SRR629986.299341
SRR629974.342866
SRR629976.295817
SRR629976.74606
SRR629971.428392
SRR629973.208508
SRR629976.568912
SRR629976.135763
SRR629983.531168
SRR629971.339263
SRR629989.570933
SRR629982.436359
SRR629976.513103
SRR629976.269764
SRR629981.588720
SRR629981.112196
SRR629977.656399
SRR629977.644089
SRR629973.586329
SRR629983.452472
SRR629983.415181
SRR629983.384036
SRR629983.152968
SRR629976.140417
SRR629986.321189
SRR629988.67638
SRR629974.272393
SRR629985.182481
SRR629985.139376
SRR629985.129840
SRR629985.107176
SRR629976.363203
SRR629983.503891
SRR629973.296520
SRR629976.510786
SRR629976.619931
SRR629977.410348
SRR629977.76152
SRR629973.507274
SRR629973.295381
SRR629973.217285
SRR629973.143413
SRR629973.96200
SRR629976.444810
SRR629976.115128
SRR629972.685236
SRR629972.582221
SRR629983.472556
SRR629971.603950
SRR629976.125048
SRR629972.721024
SRR629972.315271
SRR629972.193105
SRR629983.561437
SRR629971.644196
SRR629971.625889
SRR629973.399629
SRR629976.501955
SRR629972.149
SRR629976.524074
SRR629983.227419
SRR629971.486010
SRR629973.181395
SRR629983.206533
SRR629973.386354
SRR629976.402310
SRR629971.370900
SRR629971.82194
SRR629981.173603
SRR629977.198180
SRR629985.104876
SRR629981.87359
SRR629971.263282
SRR629977.398818
SRR629989.554490
SRR629971.165639
SRR629986.194481
SRR629982.122265
SRR629981.92244
SRR629986.152655
SRR629986.52192
SRR629978.244789
SRR629989.163760
SRR629985.92951
SRR629981.24907
SRR629977.574660
SRR629977.145840
SRR629973.538564
SRR629973.219804
SRR629988.107661
SRR629984.752201
SRR629976.237657
SRR629972.309382
SRR629972.191855
SRR629987.357681
SRR629987.347590
SRR629983.280299
SRR629983.203138
SRR629975.15395
SRR629971.278654
SRR629971.274757
SRR629971.227516
SRR629971.159214
SRR629971.97340
SRR629986.428640
SRR629986.342938
SRR629986.315360
SRR629986.230787
SRR629986.156572
SRR629986.13686
SRR629982.261735
SRR629974.557003
SRR629974.494407
SRR629974.266641
SRR629974.106365
SRR629974.45614
SRR629974.31770
SRR629974.29946
SRR629974.14185
SRR629989.647240
SRR629989.444529
SRR629989.374915
SRR629989.365444
SRR629989.275956
SRR629989.58254
SRR629989.14908
SRR629985.108142
SRR629981.258782
SRR629981.254061
SRR629981.250509
SRR629981.176151
SRR629981.75507
SRR629977.16416
SRR629973.495294
SRR629973.338528
SRR629973.284119
SRR629973.51584
SRR629988.154718
SRR629988.139686
SRR629988.133733
SRR629988.112559
SRR629988.65461
SRR629988.18241
SRR629984.709835
SRR629984.423205
SRR629984.204244
SRR629984.198163
SRR629976.575697
SRR629976.255467
SRR629976.205462
SRR629976.164603
SRR629976.81148
SRR629976.5707
SRR629972.677065
SRR629972.487271
SRR629972.237774
SRR629972.182406
SRR629987.405165
SRR629987.402681
SRR629987.141818
SRR629987.136082
SRR629983.372196
SRR629983.218888
SRR629983.140192
SRR629983.60188
SRR629979.117094
SRR629975.235966
SRR629975.15239
SRR629971.560609
SRR629971.450226
SRR629971.311237
SRR629971.212828
SRR629971.206359
SRR629971.143888
SRR629971.31763
SRR629976.312444
SRR629987.452015
SRR629978.236759
SRR629978.232506
SRR629974.490535
SRR629974.353932
SRR629974.321113
SRR629981.109249
SRR629977.27944
SRR629977.14969
SRR629988.37107
SRR629972.561817
SRR629971.97817
SRR629986.386039
SRR629984.513481
SRR629986.444486
SRR629982.348946
SRR629978.36934
SRR629985.16529
SRR629981.242869
SRR629981.222081
SRR629973.157144
SRR629976.483566
SRR629972.379751
SRR629972.220892
SRR629983.218713
SRR629979.4377
SRR629971.486098
SRR629986.111262
SRR629978.114537
SRR629989.91084
SRR629984.32107
SRR629976.428563
SRR629972.203990
SRR629974.647748
SRR629986.429537
SRR629989.499682
SRR629986.462147
SRR629986.3829
SRR629982.184152
SRR629989.429034
SRR629981.351850
SRR629984.378030
SRR629976.107752
SRR629986.281672
SRR629982.488898
SRR629989.489446
SRR629989.376365
SRR629989.248623
SRR629981.213644
SRR629981.70632
SRR629977.548074
SRR629977.385863
SRR629977.234367
SRR629977.103693
SRR629973.346071
SRR629973.259609
SRR629973.246714
SRR629988.4049
SRR629984.89726
SRR629976.120760
SRR629976.41939
SRR629972.611085
SRR629987.40363
SRR629987.36045
SRR629987.28286
SRR629987.4636
SRR629979.130796
SRR629979.114099
SRR629975.138830
SRR629971.276818
SRR629971.122989
SRR629986.285901
SRR629974.204230
SRR629973.233525
SRR629973.219973
SRR629973.132859
SRR629973.108040
SRR629980.31605
SRR629983.181629
SRR629971.596119
SRR629971.151234
SRR629986.57784
SRR629986.29679
SRR629978.134072
SRR629989.139115
SRR629973.137111
SRR629984.400108
SRR629976.55748
SRR629972.631709
SRR629987.632117
SRR629983.235052
SRR629983.3358
SRR629979.159847
SRR629979.75367
SRR629975.168379
SRR629971.689987
SRR629971.56678
SRR629974.362114
SRR629981.174439
SRR629986.480498
SRR629985.62268
SRR629985.39912
SRR629975.65456
SRR629971.373454
SRR629976.643192
SRR629976.535170
SRR629976.312318
SRR629976.286307
SRR629979.71455
SRR629973.253392
SRR629972.38738
SRR629972.25225
SRR629972.762
SRR629972.463141
SRR629976.158160
SRR629972.98164
SRR629986.223212
SRR629976.377358
SRR629976.46453
SRR629973.106193
SRR629976.329837
SRR629972.682075
SRR629972.466867
SRR629976.559593
SRR629972.331276
SRR629986.333809
SRR629989.181340
SRR629989.172508
SRR629985.146607
SRR629985.137948
SRR629985.112263
SRR629984.594262
SRR629987.223676
SRR629974.337442
SRR629977.223217
SRR629980.159111
SRR629979.52749
SRR629989.176056
SRR629977.127692
SRR629972.283240
SRR629972.69599
SRR629986.64479
SRR629977.7814
SRR629989.390384
SRR629988.137494
SRR629974.548985
SRR629973.65517
SRR629976.242065
SRR629976.440204
SRR629972.626115
SRR629973.301878
SRR629979.89177
SRR629986.369815
SRR629973.228393
SRR629976.573831
SRR629982.266232
SRR629982.163285
SRR629982.140873
SRR629978.43175
SRR629974.564988
SRR629974.543348
SRR629981.289869
SRR629977.332339
SRR629977.123598
SRR629977.94311
SRR629984.522198
SRR629987.640919
SRR629987.95208
SRR629979.60756
SRR629971.97612
SRR629986.184056
SRR629986.135522
SRR629982.404752
SRR629982.378604
SRR629982.334483
SRR629982.271610
SRR629974.350719
SRR629974.200164
SRR629989.535919
SRR629989.515278
SRR629989.499855
SRR629989.498136
SRR629989.435136
SRR629989.406467
SRR629989.341684
SRR629989.208057
SRR629985.111373
SRR629981.241998
SRR629981.218427
SRR629981.22671
SRR629973.619619
SRR629984.119044
SRR629976.587966
SRR629976.568052
SRR629972.331913
SRR629972.48046
SRR629971.558733
SRR629971.549390
SRR629971.195030
SRR629986.270614
SRR629982.128263
SRR629982.41790
SRR629978.230000
SRR629978.60382
SRR629978.54593
SRR629978.7000
SRR629974.172895
SRR629974.59269
SRR629989.528601
SRR629989.502570
SRR629985.37705
SRR629981.492062
SRR629977.454890
SRR629973.337032
SRR629973.42025
SRR629988.142891
SRR629988.34967
SRR629988.1527
SRR629984.607736
SRR629984.532085
SRR629980.232133
SRR629980.93689
SRR629976.498777
SRR629976.81382
SRR629972.232799
SRR629987.276469
SRR629987.254755
SRR629983.562843
SRR629983.317372
SRR629983.188379
SRR629983.155043
SRR629975.19878
SRR629977.641619
SRR629974.632132
SRR629975.13362
SRR629974.563758
SRR629986.231947
SRR629986.176947
SRR629986.52298
SRR629982.249170
SRR629982.119441
SRR629974.630323
SRR629974.235001
SRR629974.106355
SRR629989.503557
SRR629989.449598
SRR629989.372545
SRR629989.75478
SRR629989.57981
SRR629985.36748
SRR629985.28777
SRR629981.513347
SRR629981.309962
SRR629981.42871
SRR629981.28392
SRR629977.385280
SRR629977.370988
SRR629973.424246
SRR629973.256093
SRR629973.46862
SRR629973.35864
SRR629984.220202
SRR629984.54280
SRR629980.42924
SRR629976.586664
SRR629987.196252
SRR629987.144310
SRR629987.123459
SRR629987.42606
SRR629971.398254
SRR629986.533790
SRR629986.191086
SRR629982.595700
SRR629974.253998
SRR629989.305761
SRR629976.264739
SRR629983.518109
SRR629971.379378
SRR629982.221855
SRR629974.202555
SRR629989.332154
SRR629985.85912
SRR629985.29551
SRR629985.22106
SRR629985.16150
SRR629985.12626
SRR629977.512925
SRR629977.434223
SRR629973.258779
SRR629973.118756
SRR629984.344318
SRR629976.662827
SRR629986.389954
SRR629982.605472
SRR629982.262638
SRR629982.160178
SRR629978.213796
SRR629978.10643
SRR629974.692916
SRR629974.576133
SRR629974.530755
SRR629974.510932
SRR629974.315070
SRR629974.184302
SRR629974.158056
SRR629974.43728
SRR629989.359446
SRR629989.308741
SRR629989.106070
SRR629989.40993
SRR629985.237337
SRR629985.9879
SRR629981.482917
SRR629981.231106
SRR629981.149320
SRR629977.436886
SRR629977.394063
SRR629977.289919
SRR629977.287948
SRR629977.255159
SRR629973.424490
SRR629973.331927
SRR629973.273177
SRR629973.27083
SRR629984.142395
SRR629984.29369
SRR629984.7163
SRR629980.134683
SRR629980.127720
SRR629980.32193
SRR629976.585118
SRR629976.558795
SRR629976.421814
SRR629976.231424
SRR629976.81716
SRR629976.65319
SRR629976.4000
SRR629972.388645
SRR629972.275349
SRR629972.83034
SRR629987.533952
SRR629987.341068
SRR629987.232923
SRR629987.104544
SRR629987.99667
SRR629983.230446
SRR629983.141812
SRR629979.235442
SRR629979.60182
SRR629975.105368
SRR629971.119704
SRR629971.118956
SRR629986.234042
SRR629986.224210
SRR629986.140545
SRR629986.115664
SRR629986.91153
SRR629982.576927
SRR629982.412227
SRR629982.353067
SRR629982.11432
SRR629974.610226
SRR629974.302518
SRR629989.474546
SRR629989.367851
SRR629989.268494
SRR629981.288285
SRR629977.358741
SRR629973.96814
SRR629973.7497
SRR629984.656747
SRR629980.127459
SRR629980.110707
SRR629980.33632
SRR629976.232557
SRR629976.232317
SRR629976.153522
SRR629976.104162
SRR629987.346633
SRR629987.210218
SRR629983.335224
SRR629979.15835
SRR629988.122040
SRR629984.218440
SRR629987.580874
SRR629989.170653
SRR629971.325637
SRR629971.222708
SRR629977.115933
SRR629984.102008
SRR629984.51890
SRR629982.290956
SRR629974.412779
SRR629984.315265
SRR629987.605078
SRR629984.75871
SRR629976.616026
SRR629974.278955
SRR629979.82975
SRR629989.478198
SRR629978.13265
SRR629989.628465
SRR629989.421992
SRR629981.459866
SRR629977.594054
SRR629977.436376
SRR629977.355023
SRR629977.92080
SRR629984.94801
SRR629972.672803
SRR629972.100781
SRR629987.247104
SRR629987.14025
SRR629983.189721
SRR629983.152114
SRR629986.234286
SRR629986.69317
SRR629982.439370
SRR629982.401291
SRR629978.3718
SRR629974.165588
SRR629974.35947
SRR629974.23362
SRR629989.533496
SRR629989.459843
SRR629989.422513
SRR629989.342865
SRR629989.168280
SRR629989.126914
SRR629989.76359
SRR629989.51571
SRR629989.27498
SRR629989.23881
SRR629981.510568
SRR629981.452404
SRR629981.145015
SRR629981.54033
SRR629977.298910
SRR629977.259008
SRR629973.128223
SRR629973.73076
SRR629984.640427
SRR629984.507649
SRR629984.441947
SRR629984.46205
SRR629984.37775
SRR629984.17050
SRR629976.373123
SRR629976.219026
SRR629972.535115
SRR629972.448509
SRR629972.281016
SRR629972.259040
SRR629972.102645
SRR629987.550848
SRR629987.195465
SRR629987.170238
SRR629987.161649
SRR629987.160739
SRR629987.127545
SRR629987.67351
SRR629987.2665
SRR629983.222374
SRR629983.211501
SRR629983.46048
SRR629979.208597
SRR629979.112759
SRR629979.75980
SRR629979.75321
SRR629979.38790
SRR629979.37999
SRR629979.13775
SRR629975.224121
SRR629975.120638
SRR629971.656063
SRR629971.423370
SRR629971.168078
SRR629971.10546
SRR629974.499378
SRR629974.237421
SRR629974.101484
SRR629989.533168
SRR629989.392982
SRR629989.317457
SRR629989.166228
SRR629981.154335
SRR629977.103658
SRR629973.54268
SRR629972.267454
SRR629987.150604
SRR629971.214653
SRR629989.393927
SRR629971.488686
SRR629987.458303
SRR629978.70141
SRR629978.59322
SRR629978.26124
SRR629978.22022
SRR629974.344472
SRR629974.312033
SRR629989.563539
SRR629985.165004
SRR629984.657107
SRR629984.302147
SRR629976.114816
SRR629972.361083
SRR629987.83772
SRR629981.556226
SRR629977.410552
SRR629977.303199
SRR629973.574069
SRR629976.499823
SRR629987.147241
SRR629979.79234
SRR629979.66034
SRR629979.42656
SRR629979.5336
SRR629971.366640
SRR629975.112366
SRR629986.366457
SRR629986.257687
SRR629982.405538
SRR629988.9021
SRR629980.66272
SRR629982.441316
SRR629972.558058
SRR629989.577023
SRR629989.448454
SRR629989.338231
SRR629989.304751
SRR629989.286737
SRR629989.249371
SRR629989.147232
SRR629982.143324
SRR629976.21875
SRR629986.138365
SRR629982.449220
SRR629978.92088
SRR629978.63015
SRR629977.531598
SRR629977.278938
SRR629977.228433
SRR629977.154028
SRR629973.314852
SRR629980.136764
SRR629980.20429
SRR629976.331307
SRR629972.210474
SRR629972.148671
SRR629987.605038
SRR629987.575140
SRR629987.317927
SRR629983.210207
SRR629979.51671
SRR629979.39015
SRR629979.4805
SRR629979.266
SRR629975.73347
SRR629975.52966
SRR629971.448585
SRR629971.79689
SRR629977.258427
SRR629982.267458
SRR629982.133252
SRR629982.52399
SRR629974.290943
SRR629989.315425
SRR629989.108643
SRR629981.353812
SRR629981.348785
SRR629981.320410
SRR629977.493634
SRR629973.473191
SRR629973.168219
SRR629973.163792
SRR629973.79231
SRR629984.565699
SRR629984.393425
SRR629984.294281
SRR629980.14502
SRR629976.212668
SRR629976.63136
SRR629972.416577
SRR629972.403610
SRR629971.534737
SRR629972.401443
SRR629982.322994
SRR629977.647617
SRR629983.177651
SRR629978.9598
SRR629983.510639
SRR629976.514649
SRR629973.10200
SRR629976.226998
SRR629980.100327
SRR629971.292310
SRR629987.475658
SRR629982.317141
SRR629978.197916
SRR629971.33235
SRR629989.398304
SRR629982.365772
SRR629973.94127
SRR629986.90290
SRR629974.555967
SRR629989.15835
SRR629988.59105
SRR629971.95892
SRR629971.42982
SRR629986.523561
SRR629986.398141
SRR629986.233897
SRR629986.96896
SRR629986.90907
SRR629986.53288
SRR629986.41537
SRR629982.372727
SRR629982.217481
SRR629982.100490
SRR629982.48761
SRR629978.174488
SRR629978.163948
SRR629978.102870
SRR629978.97512
SRR629978.57186
SRR629978.47092
SRR629978.45469
SRR629974.568576
SRR629974.562782
SRR629974.531885
SRR629974.509213
SRR629974.472316
SRR629974.418333
SRR629974.351731
SRR629974.301934
SRR629989.554735
SRR629989.528583
SRR629989.389634
SRR629989.386289
SRR629989.340948
SRR629989.287803
SRR629989.284456
SRR629989.260810
SRR629989.237800
SRR629989.229450
SRR629989.225236
SRR629989.123865
SRR629989.120602
SRR629989.33810
SRR629989.23586
SRR629989.12041
SRR629985.42353
SRR629985.25059
SRR629985.12372
SRR629981.538077
SRR629981.495285
SRR629981.436081
SRR629981.396956
SRR629981.350449
SRR629981.297458
SRR629981.278584
SRR629981.231759
SRR629981.228943
SRR629981.161988
SRR629981.95261
SRR629981.88097
SRR629981.60586
SRR629981.20544
SRR629981.19848
SRR629981.16955
SRR629981.6474
SRR629977.688269
SRR629977.636421
SRR629977.471452
SRR629977.423763
SRR629977.389299
SRR629977.321341
SRR629977.304455
SRR629977.294587
SRR629977.293537
SRR629977.281711
SRR629977.221681
SRR629977.213082
SRR629977.146858
SRR629977.91951
SRR629977.58877
SRR629973.518181
SRR629973.303502
SRR629973.279243
SRR629973.277121
SRR629973.198226
SRR629973.180979
SRR629973.180191
SRR629973.142775
SRR629988.62313
SRR629988.44343
SRR629988.19314
SRR629984.519808
SRR629984.505408
SRR629984.463997
SRR629984.341685
SRR629984.219567
SRR629984.192824
SRR629984.143120
SRR629984.139999
SRR629984.97039
SRR629980.248226
SRR629980.89354
SRR629980.56214
SRR629980.55844
SRR629976.198186
SRR629976.127126
SRR629976.58249
SRR629972.503293
SRR629972.461640
SRR629972.398018
SRR629972.268752
SRR629972.260112
SRR629972.88480
SRR629987.577662
SRR629987.523630
SRR629987.409935
SRR629987.335318
SRR629987.248349
SRR629987.244719
SRR629987.225512
SRR629987.196821
SRR629987.184516
SRR629987.167626
SRR629987.152715
SRR629987.108094
SRR629987.50821
SRR629987.6648
SRR629983.178947
SRR629983.123510
SRR629983.67232
SRR629983.43356
SRR629979.56667
SRR629979.39856
SRR629975.165507
SRR629975.61722
SRR629971.552713
SRR629971.542241
SRR629971.340537
SRR629971.178499
SRR629971.70362
SRR629971.37921
SRR629981.426587
SRR629986.510657
SRR629986.501515
SRR629986.135758
SRR629982.535371
SRR629974.264977
SRR629989.490961
SRR629989.172397
SRR629989.109472
SRR629989.72539
SRR629989.64599
SRR629981.576705
SRR629981.296941
SRR629981.141807
SRR629977.428947
SRR629973.582938
SRR629984.609861
SRR629984.255695
SRR629984.48442
SRR629976.518500
SRR629976.109097
SRR629987.431737
SRR629987.367375
SRR629971.510247
SRR629971.401181
SRR629971.2021
SRR629986.399985
SRR629989.517862
SRR629973.198959
SRR629987.569150
SRR629972.642632
SRR629987.489600
SRR629971.132704
SRR629971.37429
SRR629981.326295
SRR629986.319532
SRR629984.15400
SRR629977.412843
SRR629972.121517
SRR629982.121524
SRR629978.234595
SRR629989.553574
SRR629989.234171
SRR629989.16466
SRR629985.136831
SRR629977.163461
SRR629984.558661
SRR629984.204990
SRR629984.4357
SRR629984.3197
SRR629984.1927
SRR629984.1593
SRR629972.95056
SRR629974.632004
SRR629989.452456
SRR629977.624921
SRR629977.263833
SRR629972.60480
SRR629987.244085
SRR629971.38311
SRR629986.177904
SRR629978.32682
SRR629978.18629
SRR629981.456593
SRR629988.76274
SRR629971.71238
SRR629977.637452
SRR629981.69299
SRR629989.269584
SRR629980.78189
SRR629971.230886
SRR629973.396496
SRR629973.194887
SRR629981.168074
SRR629980.37490
SRR629976.177142
SRR629974.551062
SRR629972.116033
SRR629971.16533
SRR629973.534625
SRR629973.388759
SRR629973.352546
SRR629973.336472
SRR629973.327287
SRR629973.224251
SRR629973.157075
SRR629973.136104
SRR629973.61247
SRR629973.46973
SRR629974.512671
SRR629988.65151
SRR629986.400077
SRR629974.110494
SRR629981.328047
SRR629977.396477
SRR629972.655470

## Sheet: CCS_Syn
SRR629973.467425
SRR629973.29913
SRR629983.122394
SRR629972.286451
SRR629972.141755
SRR629981.265776
SRR629973.546587
SRR629973.524179
SRR629973.513428
SRR629973.435569
SRR629973.347937
SRR629984.471080
SRR629984.285353
SRR629976.579430
SRR629972.224560
SRR629972.216024
SRR629972.113324
SRR629975.175564
SRR629971.283744
SRR629972.296144
SRR629983.163915
SRR629973.527527
SRR629972.619465
SRR629986.252531
SRR629971.600041
SRR629985.242163
SRR629973.57916
SRR629984.552085
SRR629984.255315
SRR629971.585125
SRR629987.96503
SRR629987.23379
SRR629982.34499
SRR629978.231201
SRR629989.583164
SRR629989.447163
SRR629989.175930
SRR629989.144116
SRR629981.438628
SRR629971.581807
SRR629971.451397
SRR629986.441921
SRR629977.101587
SRR629977.80557
SRR629984.361470
SRR629971.661772
SRR629971.532375
SRR629971.410449
SRR629971.328154
SRR629973.188377
SRR629983.535260
SRR629977.401676
SRR629972.109973
SRR629981.345668
SRR629982.20657
SRR629981.381677
SRR629981.274029
SRR629977.149642
SRR629984.464882
SRR629984.293145
SRR629987.5164
SRR629971.641041
SRR629987.360801
SRR629977.339567
SRR629984.357690
SRR629987.104559
SRR629980.20662
SRR629971.324716
SRR629971.420404
SRR629971.193653
SRR629973.533039
SRR629973.477730
SRR629973.398349
SRR629973.346372
SRR629973.334705
SRR629973.320248
SRR629973.263317
SRR629973.201278
SRR629972.552505
SRR629972.371396
SRR629984.522719
SRR629982.311763
SRR629989.212954
SRR629985.177520
SRR629973.446482
SRR629976.124504
SRR629972.631310
SRR629972.141184
SRR629987.35300
SRR629971.426559
SRR629971.77494
SRR629984.87658
SRR629987.82483
SRR629986.335514
SRR629986.209397
SRR629986.167741
SRR629986.43613
SRR629986.26566
SRR629982.366298
SRR629973.148779
SRR629988.61102
SRR629988.25249
SRR629984.119053
SRR629972.692838
SRR629972.677109
SRR629972.626978
SRR629987.220825
SRR629987.212804
SRR629971.643381
SRR629971.564167
SRR629971.195170
SRR629971.190501
SRR629971.185873
SRR629971.100345
SRR629986.337644
SRR629973.483732
SRR629972.392270
SRR629972.251492
SRR629987.68421
SRR629983.366643
SRR629971.295858
SRR629974.577685
SRR629981.337815
SRR629987.93397
SRR629986.361802
SRR629985.208360
SRR629985.183199
SRR629985.143539
SRR629977.549104
SRR629977.456985
SRR629973.357843
SRR629973.345808
SRR629973.287940
SRR629988.160970
SRR629984.691308
SRR629984.668730
SRR629984.249874
SRR629976.466886
SRR629972.142682
SRR629983.295306
SRR629971.671709
SRR629971.644906
SRR629971.643020
SRR629971.610949
SRR629971.363482
SRR629971.55024
SRR629971.36511
SRR629982.565867
SRR629981.480560
SRR629976.68638
SRR629983.485168
SRR629983.439214
SRR629986.171136
SRR629986.27161
SRR629985.104585
SRR629973.330730
SRR629984.377353
SRR629984.282667
SRR629976.308448
SRR629972.299067
SRR629972.297205
SRR629972.273560
SRR629972.268383
SRR629972.164546
SRR629972.144552
SRR629987.422537
SRR629971.292338
SRR629971.252248
SRR629989.414711
SRR629977.126121
SRR629973.130080
SRR629972.654816
SRR629972.513552
SRR629972.473311
SRR629972.450086
SRR629972.687677
SRR629986.486053
SRR629977.352372
SRR629989.212224
SRR629989.357321
SRR629981.593736
SRR629984.441125
SRR629983.177472
SRR629986.385929
SRR629986.285278
SRR629986.259418
SRR629978.12173
SRR629974.232547
SRR629989.262896
SRR629985.147801
SRR629985.136206
SRR629985.72041
SRR629981.444736
SRR629981.390755
SRR629977.629150
SRR629977.545092
SRR629977.497863
SRR629977.436595
SRR629977.159789
SRR629973.623786
SRR629973.478074
SRR629973.343542
SRR629973.323837
SRR629973.213784
SRR629973.181839
SRR629988.162544
SRR629988.97809
SRR629984.498710
SRR629984.456121
SRR629984.165474
SRR629984.65205
SRR629984.50927
SRR629984.48821
SRR629972.667724
SRR629972.551501
SRR629972.117817
SRR629987.375247
SRR629987.306101
SRR629987.287003
SRR629983.473921
SRR629983.429395
SRR629983.265520
SRR629983.181450
SRR629983.107937
SRR629983.107512
SRR629983.67682
SRR629979.132135
SRR629971.431261
SRR629971.121847
SRR629973.478166
SRR629986.521158
SRR629986.308365
SRR629986.267432
SRR629982.383582
SRR629982.315412
SRR629982.228067
SRR629982.166497
SRR629982.49814
SRR629974.457115
SRR629989.388891
SRR629989.319313
SRR629989.313206
SRR629989.243960
SRR629989.198361
SRR629989.182013
SRR629989.135545
SRR629989.127844
SRR629985.83363
SRR629977.481736
SRR629977.340437
SRR629973.519012
SRR629973.425419
SRR629973.401342
SRR629973.361987
SRR629973.296322
SRR629973.285620
SRR629973.166119
SRR629988.147358
SRR629988.80956
SRR629988.10090
SRR629984.614255
SRR629984.582790
SRR629984.563938
SRR629984.554252
SRR629984.508290
SRR629984.473353
SRR629984.449138
SRR629984.427242
SRR629984.398255
SRR629984.340807
SRR629984.329225
SRR629984.127963
SRR629984.104351
SRR629984.94448
SRR629984.54421
SRR629984.53943
SRR629984.32140
SRR629980.81375
SRR629976.509706
SRR629976.35356
SRR629972.581720
SRR629972.581302
SRR629972.440007
SRR629972.310211
SRR629972.276022
SRR629972.240342
SRR629972.223658
SRR629972.197579
SRR629972.159232
SRR629972.111020
SRR629972.100646
SRR629972.82549
SRR629972.68929
SRR629972.35262
SRR629987.452056
SRR629987.266427
SRR629987.196170
SRR629987.158837
SRR629987.155760
SRR629987.103556
SRR629987.97309
SRR629987.83929
SRR629987.62562
SRR629983.416289
SRR629983.341782
SRR629983.297041
SRR629983.222204
SRR629983.185934
SRR629983.180712
SRR629983.179484
SRR629983.156827
SRR629983.49657
SRR629971.431617
SRR629971.428325
SRR629971.337204
SRR629971.193484
SRR629971.170587
SRR629977.303660
SRR629984.325417
SRR629987.412904
SRR629989.360148
SRR629981.254850
SRR629973.449277
SRR629973.405108
SRR629973.186065
SRR629973.124050
SRR629984.401896
SRR629984.387137
SRR629976.262652
SRR629976.197327
SRR629976.170405
SRR629972.26221
SRR629987.29939
SRR629975.128067
SRR629971.409798
SRR629986.216700
SRR629982.439763
SRR629984.84810
SRR629972.395986
SRR629972.218085
SRR629987.656498
SRR629971.407131
SRR629974.459883
SRR629972.501052
SRR629986.365100
SRR629984.527543
SRR629973.616305
SRR629988.34284
SRR629972.66622
SRR629987.603150
SRR629972.433210
SRR629973.137685
SRR629973.130661
SRR629973.129086
SRR629983.527995
SRR629971.99950
SRR629972.251775
SRR629971.38244
SRR629971.19235
SRR629972.189059
SRR629981.237308
SRR629981.200880
SRR629973.322605
SRR629984.522432
SRR629972.396776
SRR629972.282094
SRR629972.100123
SRR629983.270285
SRR629983.184550
SRR629983.25611
SRR629971.476586
SRR629971.224937
SRR629973.97735
SRR629982.273203
SRR629988.96664
SRR629988.58969
SRR629973.61857
SRR629972.240883
SRR629982.424360
SRR629972.709708
SRR629972.607448
SRR629972.157476
SRR629972.88107
SRR629972.52419
SRR629972.50475
SRR629972.50183
SRR629971.415722
SRR629971.291658
SRR629971.257407
SRR629973.136288
SRR629988.65100
SRR629989.347880
SRR629973.183753
SRR629973.171907
SRR629972.423693
SRR629972.419998
SRR629972.186698
SRR629972.120898
SRR629971.425922
SRR629974.737608
SRR629974.462810
SRR629974.437378
SRR629983.452722
SRR629972.630589
SRR629988.87433
SRR629989.465950
SRR629973.610475
SRR629972.600813
SRR629972.507437
SRR629972.259809
SRR629983.557303
SRR629983.384533
SRR629971.597181
SRR629973.389597
SRR629982.249518
SRR629989.475643
SRR629989.427560
SRR629989.274784
SRR629989.218414
SRR629989.183122
SRR629989.125574
SRR629981.265244
SRR629987.182852
SRR629976.612571
SRR629976.576493
SRR629972.661920
SRR629989.526145
SRR629983.268513
SRR629984.318734
SRR629986.374835
SRR629974.309967
SRR629989.640604
SRR629989.304362
SRR629989.178618
SRR629981.220607
SRR629988.1329
SRR629987.555636
SRR629987.489432
SRR629987.420557
SRR629987.280706
SRR629983.215993
SRR629971.365957
SRR629971.274129
SRR629971.256053
SRR629986.460414
SRR629973.286843
SRR629988.95409
SRR629988.43477
SRR629971.488672
SRR629982.178456
SRR629989.479248
SRR629989.128541
SRR629981.93444
SRR629988.89804
SRR629988.124038
SRR629987.591861
SRR629981.425984
SRR629972.627244
SRR629971.148680
SRR629973.426255
SRR629971.411651
SRR629989.454108
SRR629986.149782
SRR629986.27991
SRR629982.300165
SRR629989.200106
SRR629981.472240
SRR629972.408890
SRR629987.422029
SRR629971.679371
SRR629986.99264
SRR629982.140473
SRR629982.7352
SRR629988.69472
SRR629987.569192
SRR629989.117983
SRR629971.366464
SRR629989.600677
SRR629989.416608
SRR629989.311043
SRR629989.233767
SRR629983.564497
SRR629971.95594
SRR629978.223286
SRR629989.415485
SRR629989.166077
SRR629989.165462
SRR629989.156902
SRR629988.110348
SRR629988.91585
SRR629988.76107
SRR629988.36543
SRR629988.12878
SRR629972.546144
SRR629987.608120
SRR629971.591903
SRR629973.301367
SRR629984.538400
SRR629971.379021
SRR629971.45025
SRR629982.563210
SRR629982.355372
SRR629989.514416
SRR629989.451000
SRR629989.403551
SRR629989.134984
SRR629985.136661
SRR629981.321542
SRR629981.112631
SRR629981.96503
SRR629984.304199
SRR629972.624798
SRR629972.615568
SRR629972.606997
SRR629972.370320
SRR629972.266160
SRR629972.154266
SRR629972.137303
SRR629972.83219
SRR629983.448079
SRR629975.24135
SRR629971.651891
SRR629971.572087
SRR629977.457924
SRR629973.5657
SRR629972.51136
SRR629981.50910
SRR629971.257824
SRR629971.581279
SRR629971.414940
SRR629981.421632
SRR629982.443409
SRR629981.448151
SRR629972.205992
SRR629973.534145
SRR629988.23614
SRR629972.364132
SRR629981.269463
SRR629984.693233
SRR629972.626975
SRR629972.626380
SRR629972.468396
SRR629972.458308
SRR629972.98128
SRR629987.508237
SRR629971.618395
SRR629971.18317
SRR629989.577924
SRR629982.600647
SRR629984.346179
SRR629983.131082
SRR629989.49725
SRR629981.33891
SRR629971.151295
SRR629982.4554
SRR629989.152200
SRR629977.163310
SRR629972.648656
SRR629986.361103
SRR629982.317545
SRR629982.252286
SRR629982.134163
SRR629978.222843
SRR629974.701657
SRR629974.590829
SRR629974.197058
SRR629974.34239
SRR629989.610613
SRR629989.595349
SRR629989.558877
SRR629989.557792
SRR629989.526537
SRR629989.509255
SRR629989.498215
SRR629989.391566
SRR629989.346391
SRR629989.290015
SRR629989.286499
SRR629989.184844
SRR629989.29049
SRR629989.24785
SRR629985.86749
SRR629981.448720
SRR629981.338806
SRR629981.297284
SRR629981.260634
SRR629981.195212
SRR629981.135011
SRR629981.113154
SRR629981.42224
SRR629973.496030
SRR629973.468054
SRR629973.241157
SRR629973.240561
SRR629973.211906
SRR629973.181809
SRR629973.166325
SRR629973.115829
SRR629973.102118
SRR629973.77261
SRR629988.109662
SRR629988.102675
SRR629988.85307
SRR629988.78896
SRR629988.41673
SRR629984.298690
SRR629980.171999
SRR629980.78233
SRR629980.77384
SRR629976.363769
SRR629976.347545
SRR629976.166515
SRR629976.73152
SRR629972.424620
SRR629972.333652
SRR629972.152425
SRR629987.548364
SRR629987.512294
SRR629987.403025
SRR629987.185048
SRR629987.16787
SRR629983.519343
SRR629983.515822
SRR629983.369820
SRR629983.218702
SRR629983.109716
SRR629983.94292
SRR629983.44901
SRR629971.660446
SRR629971.658468
SRR629971.656463
SRR629971.638847
SRR629971.612401
SRR629971.607640
SRR629971.555523
SRR629971.488198
SRR629971.484177
SRR629971.401977
SRR629971.375497
SRR629971.200867
SRR629971.156810
SRR629971.61397
SRR629971.27010
SRR629986.340626
SRR629989.105597
SRR629984.473395
SRR629972.579240
SRR629983.512098
SRR629971.54805
SRR629971.17237
SRR629989.498442
SRR629972.568204
SRR629972.546884
SRR629982.581002
SRR629982.530727
SRR629982.401582
SRR629982.397777
SRR629982.389406
SRR629984.443910
SRR629972.488199
SRR629972.199003
SRR629971.522434
SRR629971.336666
SRR629982.597325
SRR629989.290661
SRR629989.222342
SRR629981.453351
SRR629972.685124
SRR629983.149770
SRR629983.77776
SRR629971.453382
SRR629972.677890
SRR629978.37939
SRR629974.98591
SRR629976.530096
SRR629972.472363
SRR629987.232687
SRR629983.157943
SRR629971.551130
SRR629971.535717
SRR629971.323329
SRR629971.275676
SRR629971.212751
SRR629971.62141
SRR629982.122022
SRR629984.404856
SRR629971.412907
SRR629976.105648
SRR629981.372989
SRR629984.700165
SRR629972.543717
SRR629971.681437
SRR629972.130874
SRR629982.582252
SRR629982.257289
SRR629989.573098
SRR629981.465927
SRR629981.391162
SRR629981.106717
SRR629973.509430
SRR629984.605978
SRR629976.119977
SRR629972.170033
SRR629971.442593
SRR629971.432072
SRR629971.376211
SRR629984.571364
SRR629972.636774
SRR629973.493089
SRR629982.522299
SRR629976.508949
SRR629987.563338
SRR629975.162787
SRR629971.351723
SRR629971.184959
SRR629971.9854
SRR629982.261756
SRR629983.46985
SRR629986.113920
SRR629972.309258
SRR629972.239388
SRR629974.164300
SRR629984.204539
SRR629972.187627
SRR629984.177937
SRR629982.566091
SRR629987.510226
SRR629987.374827
SRR629983.235036
SRR629971.531189
SRR629971.430748
SRR629986.367850
SRR629986.207715
SRR629982.583074
SRR629985.207056
SRR629985.126975
SRR629981.402283
SRR629973.48827
SRR629984.638762
SRR629984.618769
SRR629976.366035
SRR629976.304496
SRR629976.239622
SRR629976.228711
SRR629976.181600
SRR629972.403449
SRR629983.496976
SRR629971.474597
SRR629971.453584
SRR629971.354124
SRR629971.267355
SRR629971.149426
SRR629981.186685
SRR629976.582466
SRR629986.385086
SRR629984.391617
SRR629972.207467
SRR629973.283955
SRR629973.183827
SRR629976.334284
SRR629984.278471
SRR629971.401728
SRR629986.491787
SRR629982.450650
SRR629982.284028
SRR629982.22821
SRR629978.134441
SRR629978.102679
SRR629978.82565
SRR629974.392972
SRR629985.113819
SRR629981.522239
SRR629981.215929
SRR629973.567181
SRR629973.323966
SRR629973.313601
SRR629973.306559
SRR629973.243437
SRR629988.86822
SRR629984.699193
SRR629984.556029
SRR629984.550132
SRR629984.355878
SRR629984.138916
SRR629972.701196
SRR629972.451399
SRR629972.236181
SRR629987.337611
SRR629987.87286
SRR629971.597936
SRR629971.500885
SRR629971.477524
SRR629971.462002
SRR629971.414459
SRR629971.165289
SRR629971.56885
SRR629971.28260
SRR629989.483216
SRR629973.208090
SRR629973.174622
SRR629988.151704
SRR629975.157798
SRR629971.517674
SRR629971.661
SRR629981.482289
SRR629986.417502
SRR629978.159122
SRR629974.671225
SRR629989.386598
SRR629977.668496
SRR629973.589098
SRR629984.716587
SRR629984.371957
SRR629976.349493
SRR629987.501891
SRR629971.592995
SRR629973.573719
SRR629987.222021
SRR629983.167958
SRR629971.147076
SRR629986.307224
SRR629986.220500
SRR629986.88488
SRR629972.630100
SRR629986.256555
SRR629986.388111
SRR629989.599482
SRR629989.329504
SRR629973.233953
SRR629973.229278
SRR629976.432256
SRR629976.193258
SRR629976.83012
SRR629972.527251
SRR629972.384808
SRR629983.447660
SRR629983.218564
SRR629971.183992
SRR629971.37180
SRR629971.3913
SRR629973.280857
SRR629977.462299
SRR629976.228177
SRR629972.367239
SRR629974.627163
SRR629989.8099
SRR629977.387903
SRR629984.657752
SRR629984.593242
SRR629984.344639
SRR629972.623477
SRR629987.418030
SRR629984.618533
SRR629984.545069
SRR629984.380792
SRR629984.257881
SRR629971.564794
SRR629986.316461
SRR629989.474400
SRR629989.446044
SRR629989.433576
SRR629989.431981
SRR629989.367676
SRR629989.366118
SRR629989.337627
SRR629989.289322
SRR629989.253396
SRR629989.223197
SRR629973.115792
SRR629976.220123
SRR629986.391534
SRR629984.186257
SRR629980.188839
SRR629982.368430
SRR629976.166338
SRR629982.540644
SRR629989.285720
SRR629989.265201
SRR629988.132086
SRR629976.440845
SRR629971.669240
SRR629985.228985
SRR629985.225953
SRR629981.155186
SRR629986.394449
SRR629988.12520
SRR629984.428784
SRR629984.232407
SRR629987.253358
SRR629979.64943
SRR629975.245665
SRR629975.160762
SRR629972.406178
SRR629986.285687
SRR629986.234423
SRR629982.342638
SRR629982.149762
SRR629977.204000
SRR629973.508391
SRR629973.325926
SRR629973.268177
SRR629973.213279
SRR629973.193711
SRR629973.101974
SRR629973.32325
SRR629973.29555
SRR629973.29115
SRR629976.165841
SRR629987.224340
SRR629971.263374
SRR629971.205812
SRR629982.158547
SRR629981.463996
SRR629972.246266
SRR629972.166950
SRR629972.349057
SRR629982.46973
SRR629972.120219
SRR629971.449621
SRR629971.78710
SRR629982.366709
SRR629973.226109
SRR629974.335203
SRR629984.104633
SRR629976.310382
SRR629983.54312
SRR629975.110439
SRR629975.105276
SRR629975.58786
SRR629975.52853
SRR629975.44005
SRR629982.546922
SRR629978.67393
SRR629980.41087
SRR629989.216272
SRR629972.392821
SRR629972.359346
SRR629973.258097
SRR629984.628754
SRR629984.610509
SRR629984.302005
SRR629976.496724
SRR629987.653704
SRR629987.209533
SRR629977.676466
SRR629982.279977
SRR629984.273275
SRR629984.236835
SRR629976.271281
SRR629987.45843
SRR629979.63096
SRR629976.526661
SRR629986.190357
SRR629973.552760
SRR629983.175819
SRR629986.269549
SRR629986.59030
SRR629986.57715
SRR629986.29173
SRR629974.172879
SRR629988.104532
SRR629976.569658
SRR629976.444476
SRR629976.327153
SRR629972.36031
SRR629987.412210
SRR629971.652372
SRR629973.412470
SRR629984.252035
SRR629971.392954
SRR629987.247299
SRR629973.544943
SRR629984.722988
SRR629973.263454
SRR629975.108609
SRR629971.341141
SRR629986.480571
SRR629974.542761
SRR629976.627880
SRR629983.271049
SRR629971.96397
SRR629973.511380
SRR629983.472141
SRR629976.409501
SRR629983.339838
SRR629975.46895
SRR629981.576949
SRR629987.337170
SRR629976.551254
SRR629975.245886
SRR629988.40278
SRR629989.641680
SRR629984.556578
SRR629984.247720
SRR629982.292923
SRR629989.629308
SRR629981.364891
SRR629973.310756
SRR629973.303535
SRR629973.254690
SRR629972.484399
SRR629987.595046
SRR629983.103890
SRR629971.536767
SRR629971.323161
SRR629971.145457
SRR629986.310505
SRR629984.297880
SRR629971.286804
SRR629973.344121
SRR629987.29183
SRR629989.158651
SRR629973.76902
SRR629972.61270
SRR629987.584075
SRR629971.223993
SRR629972.185680
SRR629986.448922
SRR629986.130519
SRR629986.18507
SRR629982.476095
SRR629982.288571
SRR629982.278180
SRR629978.75538
SRR629974.580113
SRR629974.304536
SRR629974.225056
SRR629974.124586
SRR629974.122460
SRR629989.456679
SRR629989.450839
SRR629989.289183
SRR629989.67929
SRR629989.58940
SRR629989.52464
SRR629989.41588
SRR629989.22442
SRR629989.19607
SRR629985.202330
SRR629985.84061
SRR629981.574579
SRR629981.525974
SRR629981.456295
SRR629973.474073
SRR629973.425390
SRR629973.195090
SRR629988.92125
SRR629988.77771
SRR629984.708047
SRR629984.686046
SRR629984.652455
SRR629984.619991
SRR629984.599912
SRR629984.507771
SRR629984.349545
SRR629984.316621
SRR629984.100051
SRR629984.84643
SRR629984.80676
SRR629976.651131
SRR629976.458339
SRR629976.360074
SRR629976.348089
SRR629972.647868
SRR629972.646968
SRR629972.638983
SRR629972.637603
SRR629972.585815
SRR629972.549178
SRR629972.387640
SRR629972.379935
SRR629972.347286
SRR629972.205300
SRR629972.190092
SRR629972.151572
SRR629972.151271
SRR629972.105852
SRR629987.606823
SRR629987.597460
SRR629987.491666
SRR629987.478298
SRR629987.434393
SRR629987.212989
SRR629987.110171
SRR629987.100161
SRR629987.1671
SRR629983.497789
SRR629983.471994
SRR629983.315481
SRR629983.185828
SRR629983.136492
SRR629983.132295
SRR629979.124023
SRR629979.34460
SRR629975.228751
SRR629975.123295
SRR629975.114138
SRR629975.32797
SRR629971.686185
SRR629971.659467
SRR629971.643825
SRR629971.615323
SRR629971.614120
SRR629971.611613
SRR629971.587511
SRR629971.568541
SRR629971.493669
SRR629971.492413
SRR629971.478284
SRR629971.469338
SRR629971.441676
SRR629971.400567
SRR629971.363730
SRR629971.326611
SRR629971.302601
SRR629971.295341
SRR629971.275101
SRR629971.264290
SRR629971.227272
SRR629971.212806
SRR629971.174411
SRR629971.125530
SRR629971.122813
SRR629971.57369
SRR629971.20268
SRR629974.451153
SRR629982.372506
SRR629973.624707
SRR629973.454445
SRR629973.111033
SRR629972.303858
SRR629987.632147
SRR629987.173393
SRR629971.545777
SRR629971.521010
SRR629971.445922
SRR629971.237023
SRR629971.182189
SRR629971.47284
SRR629971.22523
SRR629983.317156
SRR629989.65579
SRR629981.333975
SRR629981.155573
SRR629980.202084
SRR629971.420116
SRR629971.249982
SRR629971.395006
SRR629983.543339
SRR629984.576033
SRR629974.728681
SRR629989.543843
SRR629989.502375
SRR629977.507668
SRR629973.533368
SRR629971.659134
SRR629987.220886
SRR629987.590356
SRR629971.205109
SRR629973.216674
SRR629973.489358
SRR629973.535090
SRR629971.649258
SRR629982.570390
SRR629982.240999
SRR629981.459224
SRR629981.167185
SRR629977.269079
SRR629984.507381
SRR629987.255216
SRR629986.81846
SRR629986.290931
SRR629986.47475
SRR629982.213694
SRR629989.370114
SRR629977.384322
SRR629973.563276
SRR629973.484285
SRR629973.230788
SRR629973.208762
SRR629984.652801
SRR629984.494189
SRR629984.394894
SRR629972.523061
SRR629972.462974
SRR629972.420219
SRR629972.325415
SRR629987.387172
SRR629983.407584
SRR629983.248325
SRR629971.567386
SRR629971.492081
SRR629971.405888
SRR629971.399355
SRR629971.211602
SRR629971.184763
SRR629983.210648
SRR629983.183257
SRR629974.449380
SRR629986.365090
SRR629986.197624
SRR629982.451049
SRR629982.262864
SRR629982.83763
SRR629989.454221
SRR629989.114807
SRR629989.18509
SRR629981.369457
SRR629981.229624
SRR629977.335522
SRR629988.150513
SRR629988.90721
SRR629984.705448
SRR629984.593155
SRR629984.358866
SRR629980.204863
SRR629972.287752
SRR629987.410892
SRR629983.201613
SRR629983.146194
SRR629971.566844
SRR629971.469345
SRR629971.414273
SRR629971.404739
SRR629971.387361
SRR629971.253287
SRR629971.177680
SRR629971.111971
SRR629989.397338
SRR629985.220745
SRR629977.635162
SRR629972.714802
SRR629983.312884
SRR629972.632717
SRR629972.100362
SRR629987.517646
SRR629971.648594
SRR629971.273911
SRR629989.458333
SRR629985.239099
SRR629972.611116
SRR629972.558831
SRR629987.558644
SRR629971.553875
SRR629971.547707
SRR629971.308355
SRR629986.521864
SRR629986.507327
SRR629986.384338
SRR629986.328101
SRR629986.298643
SRR629986.281895
SRR629986.205358
SRR629986.195502
SRR629982.247556
SRR629982.134900
SRR629982.134308
SRR629982.122016
SRR629982.93839
SRR629978.182634
SRR629978.140120
SRR629978.116314
SRR629978.106627
SRR629974.676993
SRR629974.517134
SRR629974.368150
SRR629974.258161
SRR629989.631971
SRR629989.486772
SRR629989.436702
SRR629989.374671
SRR629989.309254
SRR629989.280702
SRR629989.199773
SRR629989.176717
SRR629985.218985
SRR629985.195253
SRR629985.135337
SRR629985.82314
SRR629985.71375
SRR629985.41972
SRR629981.467287
SRR629981.344110
SRR629981.116554
SRR629977.610475
SRR629977.533935
SRR629977.480072
SRR629977.333788
SRR629977.185499
SRR629977.152266
SRR629977.61346
SRR629977.43490
SRR629977.1566
SRR629973.578569
SRR629973.544717
SRR629973.492037
SRR629973.411640
SRR629973.390243
SRR629973.173612
SRR629973.117597
SRR629988.140798
SRR629988.127397
SRR629988.110657
SRR629984.641297
SRR629984.625193
SRR629984.565011
SRR629984.336124
SRR629984.307746
SRR629984.253719
SRR629984.242125
SRR629984.92238
SRR629980.236731
SRR629980.54577
SRR629976.596338
SRR629976.554402
SRR629976.378001
SRR629976.190183
SRR629972.628468
SRR629972.615903
SRR629972.614057
SRR629972.474713
SRR629972.472419
SRR629972.390993
SRR629972.308647
SRR629972.306254
SRR629972.292909
SRR629972.291209
SRR629972.255769
SRR629972.235087
SRR629972.125546
SRR629972.123516
SRR629972.28289
SRR629972.20227
SRR629987.548175
SRR629987.380913
SRR629987.317098
SRR629987.93038
SRR629987.18938
SRR629983.396167
SRR629979.200657
SRR629971.690845
SRR629971.651501
SRR629971.645445
SRR629971.640242
SRR629971.629694
SRR629971.466261
SRR629971.458095
SRR629971.432689
SRR629971.395500
SRR629971.353570
SRR629971.326966
SRR629971.325178
SRR629971.291416
SRR629971.280171
SRR629971.266432
SRR629971.250979
SRR629971.222849
SRR629971.182383
SRR629971.180790
SRR629971.132767
SRR629971.99575
SRR629971.96338
SRR629971.72255
SRR629971.52809
SRR629974.512867
SRR629973.579187
SRR629973.500047
SRR629989.608952
SRR629980.233057
SRR629971.635020
SRR629989.21134
SRR629986.515485
SRR629982.180813
SRR629974.93183
SRR629989.466728
SRR629989.397583
SRR629989.70412
SRR629989.49999
SRR629989.20520
SRR629989.7989
SRR629981.571981
SRR629984.106364
SRR629980.56345
SRR629987.339619
SRR629983.460305
SRR629979.155854
SRR629975.248466
SRR629971.588435
SRR629971.363956
SRR629971.164143
SRR629971.128071
SRR629971.37526
SRR629987.223432
SRR629986.301518
SRR629986.174475
SRR629986.96530
SRR629982.538519
SRR629982.225298
SRR629982.196495
SRR629978.205975
SRR629978.89945
SRR629978.44925
SRR629974.673650
SRR629974.658534
SRR629974.520674
SRR629974.310934
SRR629989.387332
SRR629989.111877
SRR629985.196729
SRR629985.126491
SRR629985.77729
SRR629985.13869
SRR629981.211007
SRR629981.106075
SRR629977.448196
SRR629977.112744
SRR629973.416232
SRR629973.112626
SRR629988.151764
SRR629988.140115
SRR629988.71088
SRR629984.498245
SRR629984.428429
SRR629984.420441
SRR629984.272184
SRR629984.31067
SRR629976.398418
SRR629972.545650
SRR629972.536629
SRR629972.535408
SRR629972.527020
SRR629972.507051
SRR629972.433882
SRR629972.129263
SRR629972.126718
SRR629987.174090
SRR629987.165868
SRR629983.457525
SRR629979.115203
SRR629975.137128
SRR629971.549573
SRR629971.489141
SRR629971.352701
SRR629971.268749
SRR629971.235328
SRR629985.155646
SRR629982.400096
SRR629974.344959
SRR629981.486096
SRR629981.399364
SRR629988.147495
SRR629984.358520
SRR629987.440122
SRR629989.488938
SRR629984.301402
SRR629971.127325
SRR629986.191986
SRR629984.648706
SRR629984.409594
SRR629984.202849
SRR629972.341993
SRR629972.208700
SRR629971.402792
SRR629986.416930
SRR629986.176082
SRR629974.628381
SRR629989.530277
SRR629989.75992
SRR629985.185603
SRR629981.518203
SRR629981.256135
SRR629977.558556
SRR629973.545748
SRR629973.209068
SRR629973.184769
SRR629987.151748
SRR629971.638574
SRR629971.590855
SRR629971.555074
SRR629971.422924
SRR629982.119130
SRR629974.556199
SRR629981.358613
SRR629971.429852
SRR629974.640878
SRR629972.679630
SRR629981.71402
SRR629987.569023
SRR629986.342356
SRR629986.331105
SRR629986.254287
SRR629986.71066
SRR629982.585575
SRR629982.345890
SRR629985.219872
SRR629985.155382
SRR629981.565851
SRR629981.528208
SRR629981.433522
SRR629981.285755
SRR629981.243396
SRR629973.615278
SRR629973.598886
SRR629973.582886
SRR629973.474512
SRR629973.422152
SRR629973.322364
SRR629973.308502
SRR629973.284860
SRR629973.250427
SRR629973.170525
SRR629973.170294
SRR629984.597915
SRR629984.495213
SRR629984.449759
SRR629984.411543
SRR629984.368900
SRR629984.280673
SRR629972.656753
SRR629972.354705
SRR629987.658064
SRR629987.475282
SRR629987.469813
SRR629987.408798
SRR629987.177334
SRR629983.531566
SRR629983.233569
SRR629983.90502
SRR629983.42687
SRR629975.220886
SRR629975.208281
SRR629971.655056
SRR629971.605177
SRR629971.573285
SRR629971.493574
SRR629971.152937
SRR629971.137965
SRR629971.108601
SRR629971.83547
SRR629971.46015
SRR629986.378737
SRR629986.214843
SRR629986.111790
SRR629982.192203
SRR629978.6323
SRR629974.569736
SRR629981.326237
SRR629984.585747
SRR629984.480920
SRR629974.593786
SRR629971.504837
SRR629981.366263
SRR629984.661426
SRR629971.333082
SRR629971.373293
SRR629979.242158
SRR629971.409581
SRR629986.433154
SRR629986.302394
SRR629986.212818
SRR629986.56124
SRR629986.14863
SRR629989.317837
SRR629989.315980
SRR629981.138840
SRR629973.479458
SRR629988.103497
SRR629984.559809
SRR629987.461663
SRR629971.401732
SRR629971.359749
SRR629982.215471
SRR629972.60716
SRR629987.528812
SRR629975.137790
SRR629972.714544
SRR629978.173199
SRR629982.480029
SRR629978.238528
SRR629989.568631
SRR629985.72097
SRR629985.18254
SRR629981.481576
SRR629973.581982
SRR629973.479564
SRR629973.178531
SRR629984.485077
SRR629972.616463
SRR629972.290427
SRR629987.387808
SRR629971.529006
SRR629971.525261
SRR629971.492527
SRR629971.436458
SRR629971.275598
SRR629971.166212
SRR629971.153871
SRR629984.711031
SRR629984.699843
SRR629972.446428
SRR629973.125922
SRR629986.488702
SRR629986.362196
SRR629986.231875
SRR629986.42962
SRR629982.575411
SRR629982.443251
SRR629982.383439
SRR629982.340444
SRR629982.286360
SRR629978.147434
SRR629974.673357
SRR629974.654068
SRR629974.57208
SRR629989.420293
SRR629989.312353
SRR629985.146932
SRR629985.57627
SRR629985.34985
SRR629981.292617
SRR629977.638479
SRR629973.491111
SRR629973.472043
SRR629973.398643
SRR629988.76686
SRR629988.42587
SRR629984.712980
SRR629984.658925
SRR629984.330043
SRR629984.271266
SRR629980.10701
SRR629976.603051
SRR629976.600408
SRR629976.554767
SRR629976.483854
SRR629976.396497
SRR629976.262088
SRR629976.236708
SRR629976.185165
SRR629976.133539
SRR629976.57019
SRR629972.630556
SRR629972.607085
SRR629972.584636
SRR629972.583182
SRR629972.369956
SRR629987.540837
SRR629987.500172
SRR629987.428374
SRR629987.291808
SRR629987.231559
SRR629987.160164
SRR629987.128923
SRR629987.54281
SRR629983.458640
SRR629983.220771
SRR629979.87870
SRR629979.65562
SRR629979.54866
SRR629979.51366
SRR629979.49241
SRR629971.661316
SRR629971.653949
SRR629971.635047
SRR629971.628703
SRR629971.604314
SRR629971.581672
SRR629971.517857
SRR629971.485797
SRR629971.358177
SRR629971.349599
SRR629971.226108
SRR629971.160425
SRR629971.5328
SRR629989.285650
SRR629989.13662
SRR629988.118093
SRR629975.131789
SRR629975.120316
SRR629981.519379
SRR629986.237963
SRR629981.553712
SRR629984.330325
SRR629972.531316
SRR629971.396553
SRR629986.194524
SRR629981.586697
SRR629973.385551
SRR629984.154952
SRR629987.270024
SRR629975.95448
SRR629975.73215
SRR629971.248665
SRR629971.203023
SRR629986.210589
SRR629985.195018
SRR629971.657616
SRR629986.249606
SRR629989.259658
SRR629985.164430
SRR629985.139221
SRR629985.60152
SRR629977.400202
SRR629977.348560
SRR629977.312372
SRR629977.241517
SRR629988.36559
SRR629976.335623
SRR629987.492294
SRR629987.429321
SRR629971.687669
SRR629971.437975
SRR629986.480501
SRR629986.391401
SRR629986.311732
SRR629986.186693
SRR629986.150400
SRR629986.138575
SRR629982.505723
SRR629982.354180
SRR629982.247507
SRR629982.198177
SRR629982.146559
SRR629982.12220
SRR629978.130461
SRR629974.599729
SRR629974.140639
SRR629974.36927
SRR629989.505770
SRR629989.474318
SRR629989.437291
SRR629989.212738
SRR629989.164488
SRR629989.109468
SRR629985.236941
SRR629985.167073
SRR629985.166286
SRR629985.165842
SRR629985.154162
SRR629985.110635
SRR629985.97782
SRR629981.512166
SRR629981.422425
SRR629981.318704
SRR629977.640782
SRR629977.578261
SRR629977.492910
SRR629977.254104
SRR629977.89222
SRR629973.404948
SRR629973.366129
SRR629973.273465
SRR629973.253804
SRR629973.139800
SRR629973.103737
SRR629988.2449
SRR629984.697554
SRR629984.691101
SRR629984.636258
SRR629984.622047
SRR629984.587827
SRR629984.500271
SRR629984.392122
SRR629984.385840
SRR629984.371268
SRR629984.233016
SRR629984.158604
SRR629984.148860
SRR629984.84626
SRR629984.36024
SRR629976.649135
SRR629976.485786
SRR629976.441196
SRR629976.351276
SRR629976.348295
SRR629976.302414
SRR629976.296939
SRR629976.286004
SRR629976.224196
SRR629976.102499
SRR629972.680824
SRR629972.467612
SRR629972.446483
SRR629972.172695
SRR629987.650320
SRR629987.522431
SRR629987.493474
SRR629987.462903
SRR629987.398132
SRR629987.378858
SRR629987.333594
SRR629987.315037
SRR629987.283562
SRR629987.65521
SRR629987.56417
SRR629983.422833
SRR629983.210251
SRR629983.34155
SRR629971.617062
SRR629971.582561
SRR629971.464068
SRR629971.458872
SRR629971.444022
SRR629971.442616
SRR629971.345346
SRR629971.316195
SRR629971.311077
SRR629971.293275
SRR629971.251075
SRR629971.221043
SRR629971.198162
SRR629971.181149
SRR629971.170044
SRR629971.163028
SRR629971.123196
SRR629971.118349
SRR629971.39304
SRR629971.37440
SRR629984.497024
SRR629980.235069
SRR629978.44685
SRR629989.301551
SRR629984.318361
SRR629983.432454
SRR629971.499943
SRR629971.321059
SRR629971.211439
SRR629973.500633
SRR629984.175837
SRR629977.583826
SRR629981.431608
SRR629980.216962
SRR629980.200918
SRR629976.565805
SRR629972.552322
SRR629972.384271
SRR629987.489220
SRR629987.354574
SRR629987.247212
SRR629987.184943
SRR629983.108181
SRR629971.673020
SRR629971.660101
SRR629971.364560
SRR629971.97411
SRR629971.54239
SRR629971.45155
SRR629987.567959
SRR629987.645935
SRR629976.40544
SRR629972.572962
SRR629982.86524
SRR629974.500551
SRR629977.441605
SRR629976.583732
SRR629976.527313
SRR629972.194548
SRR629983.382661
SRR629975.202563
SRR629971.560507
SRR629971.212678
SRR629971.324039
SRR629984.465613
SRR629971.290892
SRR629972.661010
SRR629986.306728
SRR629982.420972
SRR629982.352898
SRR629989.533520
SRR629977.482726
SRR629973.548663
SRR629973.483041
SRR629973.439082
SRR629973.302120
SRR629973.292056
SRR629973.241398
SRR629973.198418
SRR629973.116945
SRR629973.98586
SRR629973.12017
SRR629984.578037
SRR629984.560350
SRR629984.377068
SRR629984.341012
SRR629984.327678
SRR629976.337062
SRR629976.246579
SRR629976.75301
SRR629972.636977
SRR629972.608788
SRR629972.256990
SRR629987.516995
SRR629987.495231
SRR629987.400655
SRR629987.368438
SRR629987.367498
SRR629987.23137
SRR629983.218205
SRR629983.53342
SRR629983.15989
SRR629975.133828
SRR629975.62255
SRR629971.574471
SRR629971.389955
SRR629971.378952
SRR629971.309861
SRR629971.23086
SRR629982.281230
SRR629977.459491
SRR629989.241104
SRR629989.102574
SRR629976.413799
SRR629971.672460
SRR629986.523331
SRR629984.220957
SRR629983.32096
SRR629989.370351
SRR629973.493421
SRR629973.378883
SRR629984.395975
SRR629976.539671
SRR629976.377158
SRR629976.318862
SRR629972.703405
SRR629972.682443
SRR629972.602003
SRR629972.277327
SRR629987.610192
SRR629987.572155
SRR629983.487525
SRR629983.444372
SRR629971.653925
SRR629971.603915
SRR629971.581635
SRR629971.131956
SRR629971.42488
SRR629971.31315
SRR629971.22645
SRR629986.465240
SRR629989.451548
SRR629989.105195
SRR629977.334379
SRR629984.483702
SRR629971.560701
SRR629973.119675
SRR629971.491395
SRR629984.389587
SRR629972.210033
SRR629971.426829
SRR629976.216408
SRR629986.337892
SRR629982.308195
SRR629978.2693
SRR629977.347627
SRR629973.104541
SRR629976.357845
SRR629972.590923
SRR629983.380831
SRR629971.149430
SRR629971.108117
SRR629986.50652
SRR629984.246950
SRR629971.26408
SRR629976.442845
SRR629976.433418
SRR629976.402879
SRR629983.183459
SRR629983.115287
SRR629975.56386
SRR629986.382952
SRR629989.395585
SRR629984.691703
SRR629987.131969
SRR629979.118870
SRR629979.53047
SRR629979.29322
SRR629987.607366
SRR629986.288262
SRR629982.299485
SRR629985.136007
SRR629985.129191
SRR629981.319063
SRR629977.577582
SRR629973.615632
SRR629984.484191
SRR629976.659407
SRR629976.600461
SRR629976.564863
SRR629976.509535
SRR629976.297831
SRR629976.97114
SRR629987.531761
SRR629987.442944
SRR629987.175930
SRR629987.34652
SRR629983.485986
SRR629983.280545
SRR629979.107086
SRR629971.330819
SRR629971.229515
[truncated: 3,548 more rows]

## Sheet: NPSG_SAR11
SRR1253859_146710
SRR1253742_256517
SRR1253932_20791
SRR1253930_35764
SRR1253857_527173
SRR1253848_69921
SRR1240135_353101
SRR1253690_381403
SRR1253847_307916
SRR1253864_932090
SRR1253864_432533
SRR1253755_183103
SRR1253901_368327
SRR1240162_554575
SRR1253876_343445
SRR1253851_349154
SRR1253748_69060
SRR1253907_437513
SRR1253905_424217
SRR1253869_360602
SRR1253848_421995
SRR1253880_317849
SRR1253874_156209
SRR1253867_278758
SRR1253697_222550
SRR1253893_288203
SRR1253881_19712
SRR1253873_167058
SRR1253865_675656
SRR1253864_50806
SRR1253875_104600
SRR1253857_436735
SRR1253754_103161
SRR1253871_78560
SRR1253976_229331
SRR1253935_21795
SRR1253745_334450
SRR1253907_188992
SRR1253897_188688
SRR1253894_248522
SRR1253891_48431
SRR1253872_96206
SRR1253868_331565
SRR1253866_256301
SRR1253864_666685
SRR1253864_358768
SRR1253861_185590
SRR1253852_965879
SRR1253845_83939
SRR1253744_390006
SRR1253932_202654
SRR1253888_92390
SRR1253873_291463
SRR1253742_52724
SRR1253869_13506
SRR1253755_494977
SRR1240165_841000
SRR1253872_225567
SRR1253867_624078
SRR1253861_393925
SRR1253759_447731
SRR1253745_41925
SRR1253743_316665
SRR1253740_348
SRR1253764_73819
SRR1253763_181492
SRR1253858_317551
SRR1253932_596519
SRR1240166_152633
SRR1253761_14142
SRR1253744_467791
SRR1240162_335025
SRR1253871_118927
SRR1240161_596793
SRR1240137_145010
SRR1253896_202432
SRR1253756_129225
SRR1253750_231018
SRR1253747_241318
SRR1253741_154130
SRR1253740_45858
SRR1253699_282327
SRR1253699_166434
SRR1240167_373992
SRR1253897_733214
SRR1253895_206044
SRR1253888_80603
SRR1253883_282792
SRR1253881_283903
SRR1253876_346376
SRR1253873_191492
SRR1253873_181516
SRR1253871_110876
SRR1253861_160630
SRR1253860_101142
SRR1253858_184325
SRR1253858_15505
SRR1253851_304143
SRR1253850_307799
SRR1253975_253448
SRR1253974_26543
SRR1253935_360369
SRR1253691_132214
SRR1240172_40388
SRR1240171_251784
SRR1253862_34594
SRR1253858_141006
SRR1253975_105880
SRR1253758_535741
SRR1253690_716179
SRR1253890_160011
SRR1253888_102057
SRR1253854_487767
SRR1253847_32326
SRR1253762_124772
SRR1253974_9617
SRR1253935_568484
SRR1253935_248184
SRR1253755_493097
SRR1253754_136825
SRR1253745_410617
SRR1253744_281839
SRR1253742_180389
SRR1253698_161485
SRR1253691_85096
SRR1240169_26092
SRR1240167_147103
SRR1253902_506931
SRR1253894_236889
SRR1253891_57279
SRR1253890_17916
SRR1253889_372518
SRR1253882_48001
SRR1253882_209168
SRR1253881_476558
SRR1253881_329599
SRR1253881_471459
SRR1253881_84206
SRR1253880_58602
SRR1253877_80226
SRR1253876_273745
SRR1253875_229683
SRR1253875_101053
SRR1253873_426735
SRR1253873_389112
SRR1253873_388508
SRR1253872_217828
SRR1253872_310687
SRR1253871_135997
SRR1253868_14259
SRR1253865_613594
SRR1253861_72513
SRR1253860_168316
SRR1253859_282283
SRR1253854_277134
SRR1253851_14732
SRR1253848_504485
SRR1253847_259274
SRR1253845_573565
SRR1253761_226718
SRR1253760_102231
SRR1253759_9172
SRR1240135_491743
SRR1253974_535187
SRR1253935_93970
SRR1253743_34221
SRR1253695_506390
SRR1253934_35751
SRR1253896_364856
SRR1253896_25956
SRR1253894_595972
SRR1253894_422675
SRR1253894_591544
SRR1253893_111526
SRR1240166_817567
SRR1253888_109879
SRR1253883_301669
SRR1253882_36453
SRR1253878_192501
SRR1253874_63515
SRR1253865_799463
SRR1253865_365041
SRR1253861_62623
SRR1253861_11445
SRR1253861_272292
SRR1253860_85723
SRR1253857_41597
SRR1253851_159941
SRR1253849_62892
SRR1253764_50049
SRR1253764_285140
SRR1253764_169505
SRR1253762_356562
SRR1253761_222121
SRR1253759_427125
SRR1253759_320467
SRR1240137_290781
SRR1253974_537134
SRR1253974_193885
SRR1253974_181644
SRR1253974_33572
SRR1253935_585529
SRR1253935_154237
SRR1253758_370057
SRR1253758_227141
SRR1253758_414625
SRR1253757_175586
SRR1253756_92398
SRR1253755_451587
SRR1253755_177739
SRR1253754_471114
SRR1253754_325435
SRR1253754_303735
SRR1253754_104817
SRR1253752_104615
SRR1253749_167821
SRR1253748_307782
SRR1253748_87249
SRR1253747_49336
SRR1253746_495559
SRR1253746_461082
SRR1253746_130538
SRR1253746_644978
SRR1253746_23013
SRR1253745_378212
SRR1253745_194144
SRR1253745_136137
SRR1253744_223150
SRR1253744_105229
SRR1253744_161108
SRR1253743_468980
SRR1253743_430417
SRR1253743_241405
SRR1253743_47679
SRR1253743_310976
SRR1253742_332826
SRR1253742_294066
SRR1253742_644101
SRR1253742_405650
SRR1253695_17207
SRR1253693_420046
SRR1253692_154605
SRR1253692_123680
SRR1253692_255899
SRR1240170_547958
SRR1240170_437300
SRR1240168_506401
SRR1240168_19023
SRR1240168_49512
SRR1240167_247739
SRR1253933_380717
SRR1253905_47428
SRR1253904_148733
SRR1253896_7044
SRR1253895_12512
SRR1253895_290747
SRR1253894_615793
SRR1253894_450718
SRR1253894_420831
SRR1253893_504527
SRR1253893_402973
SRR1253893_193350
SRR1253893_123288
SRR1253893_550757
SRR1240166_115032
SRR1240165_285318
SRR1240164_333555
SRR1253892_310947
SRR1253889_505207
SRR1253888_102661
SRR1253888_312100
SRR1253888_276152
SRR1253883_94955
SRR1253882_125916
SRR1253881_312744
SRR1253881_117859
SRR1253880_321163
SRR1253880_440992
SRR1253880_10804
SRR1253878_256729
SRR1253878_27273
SRR1253877_298499
SRR1253877_286396
SRR1253876_409263
SRR1253876_372166
SRR1253876_517823
SRR1253876_15869
SRR1253875_120121
SRR1253874_266786
SRR1253872_96965
SRR1253872_89668
SRR1253870_192398
SRR1253869_283687
SRR1253868_22462
SRR1253867_424023
SRR1253863_206339
SRR1253862_62705
SRR1253862_130347
SRR1253861_214786
SRR1253861_164140
SRR1253860_81935
SRR1253860_27932
SRR1253860_313628
SRR1253860_106805
SRR1253860_59884
SRR1253859_289945
SRR1253859_115415
SRR1253858_159480
SRR1253858_60078
SRR1253857_69559
SRR1253856_250983
SRR1253856_83627
SRR1253856_157240
SRR1253856_137957
SRR1253851_210614
SRR1253850_31804
SRR1253849_131637
SRR1253849_41605
SRR1253849_13693
SRR1253849_301425
SRR1253849_223266
SRR1253848_314707
SRR1253848_270341
SRR1253848_87045
SRR1253847_133936
SRR1253845_198996
SRR1253845_199586
SRR1253764_344072
SRR1253764_151608
SRR1253763_330538
SRR1253763_415485
SRR1253762_603894
SRR1253762_414453
SRR1253762_402310
SRR1253762_285341
SRR1253762_240375
SRR1253760_195764
SRR1240137_40208
SRR1240135_495503
SRR1240135_437222
SRR1240163_248396
SRR1253976_372017
SRR1253974_328861
SRR1253974_472763
SRR1253935_349905
SRR1253935_299034
SRR1253756_266364
SRR1253754_103146
SRR1253751_195337
SRR1253749_166779
SRR1253748_113039
SRR1253747_272836
SRR1253746_640987
SRR1253745_360599
SRR1253699_144349
SRR1253698_289490
SRR1253697_20517
SRR1253696_122757
SRR1240172_60692
SRR1253896_352684
SRR1253896_313618
SRR1253893_714439
SRR1253893_340762
SRR1253893_313410
SRR1240166_563273
SRR1253891_198577
SRR1253891_37272
SRR1253891_265031
SRR1253890_331808
SRR1253888_254552
SRR1253883_124632
SRR1253882_43100
SRR1253882_32066
SRR1253880_210517
SRR1253880_204595
SRR1253877_559861
SRR1253876_414876
SRR1253876_182226
SRR1253876_110860
SRR1253874_62108
SRR1253873_134501
SRR1253873_169359
SRR1253872_221772
SRR1253871_207712
SRR1253870_188874
SRR1253865_196434
SRR1253861_149730
SRR1253860_38400
SRR1253859_418422
SRR1253859_186548
SRR1253859_34866
SRR1253857_138313
SRR1253855_332984
SRR1253854_195015
SRR1253847_110178
SRR1253845_253987
SRR1253845_115754
SRR1253764_339732
SRR1253760_218082
SRR1240161_176730
SRR1240161_176691
SRR1240136_105833
SRR1240135_596828
SRR1240136_341892
SRR1253754_101583
SRR1253748_263241
SRR1253896_111358
SRR1253894_393617
SRR1253891_137004
SRR1253871_130088
SRR1253864_541000
SRR1253855_260730
SRR1253761_80941
SRR1253748_64767
SRR1253747_512293
SRR1253746_505822
SRR1253745_88177
SRR1253743_442905
SRR1253743_106458
SRR1253742_88984
SRR1253693_285813
SRR1253693_181168
SRR1253692_10661
SRR1240171_112073
SRR1240170_234116
SRR1240170_4076
SRR1240168_481193
SRR1253896_266295
SRR1253896_168408
SRR1253894_266883
SRR1240166_567402
SRR1240162_570609
SRR1253890_389688
SRR1253889_602963
SRR1253888_197745
SRR1253882_150282
SRR1253863_127575
SRR1253859_161159
SRR1253855_470512
SRR1253850_300804
SRR1253848_90828
SRR1253847_107755
SRR1253762_253172
SRR1240161_42773
SRR1253846_42708
SRR1253976_353615
SRR1253974_73820
SRR1253757_270971
SRR1253754_90882
SRR1253750_173001
SRR1253745_92879
SRR1253744_146634
SRR1253743_52523
SRR1253694_12817
SRR1253690_603459
SRR1240172_160385
SRR1240172_87678
SRR1253934_68166
SRR1253896_169243
SRR1253894_499300
SRR1253893_343184
SRR1253893_802727
SRR1240165_633896
SRR1240165_340260
SRR1253892_294027
SRR1253891_344948
SRR1253890_251905
SRR1253877_250421
SRR1253877_176695
SRR1253877_448173
SRR1253872_160975
SRR1253868_159942
SRR1253857_143670
SRR1253849_415743
SRR1253847_273220
SRR1253845_161426
SRR1253762_96767
SRR1253760_308711
SRR1253759_359998
SRR1253974_220482
SRR1253974_678570
SRR1253974_381203
SRR1253935_637083
SRR1253754_445228
SRR1253754_278939
SRR1253750_362170
SRR1253750_268964
SRR1253749_95680
SRR1253749_79096
SRR1253745_260532
SRR1253744_351089
SRR1253741_56608
SRR1253694_492387
SRR1253693_437605
SRR1253692_376070
SRR1253691_553775
SRR1253691_436440
SRR1253690_629614
SRR1240170_168706
SRR1240168_395425
SRR1240167_185095
SRR1253902_330607
SRR1253896_73897
SRR1240166_253808
SRR1240165_876496
SRR1240164_56250
SRR1240163_109763
SRR1253892_34121
SRR1253883_198995
SRR1253881_241797
SRR1253874_45795
SRR1253872_279084
SRR1253869_120694
SRR1253863_114857
SRR1253862_2772
SRR1253858_310445
SRR1253856_571731
SRR1253856_545890
SRR1253851_121294
SRR1253761_213132
SRR1253760_160374
SRR1253759_223799
SRR1253974_691583
SRR1253935_582402
SRR1253935_294267
SRR1253889_171739
SRR1253864_4626
SRR1253759_503224
SRR1253762_166689
SRR1253873_498563
SRR1253976_115876
SRR1253933_51215
SRR1253931_391361
SRR1253890_307733
SRR1253881_125967
SRR1253871_31329
SRR1253864_727135
SRR1253882_35211
SRR1253974_406063
SRR1253974_70005
SRR1253757_221795
SRR1253757_67084
SRR1253756_284371
SRR1253755_171069
SRR1253745_420202
SRR1253743_237808
SRR1253742_132400
SRR1253742_8797
SRR1253697_266548
SRR1240170_61003
SRR1240169_8844
SRR1253934_244953
SRR1253934_244928
SRR1253933_409884
SRR1253931_532128
SRR1253893_716624
SRR1240166_400610
SRR1240166_344529
SRR1240162_536379
SRR1253883_300479
SRR1253883_134763
SRR1253882_90685
SRR1253881_509439
SRR1253881_100409
SRR1253881_382041
SRR1253879_80315
SRR1253878_230375
SRR1253877_205913
SRR1253876_382342
SRR1253875_228099
SRR1253874_159554
SRR1253874_15520
SRR1253873_427945
SRR1253873_491954
SRR1253872_189591
SRR1253872_315617
SRR1253870_131390
SRR1253870_93335
SRR1253864_337946
SRR1253863_114404
SRR1253861_109402
SRR1253860_41466
SRR1253859_450588
SRR1253858_26035
SRR1253857_366153
SRR1253856_52989
SRR1253851_117904
SRR1253850_221057
SRR1253850_60586
SRR1253849_165241
SRR1253845_466133
SRR1253764_34596
SRR1253763_515581
SRR1240161_325793
SRR1240161_222070
SRR1240137_189617
SRR1240137_189607
SRR1240137_99990
SRR1240135_444889
SRR1240134_258025
SRR1240134_339270
SRR1253934_182853
SRR1253933_414367
SRR1253905_98387
SRR1253877_187507
SRR1253875_192908
SRR1253870_31528
SRR1253762_631915
SRR1253883_64134
SRR1253855_517608
SRR1253756_17856
SRR1240169_310428
SRR1253893_290112
SRR1240166_764304
SRR1240162_341428
SRR1253881_251200
SRR1253759_312708
SRR1240161_591267
SRR1253907_161660
SRR1253758_443939
SRR1253742_555167
SRR1253697_28592
SRR1253894_469199
SRR1253753_139108
SRR1253743_462623
SRR1253691_184736
SRR1253881_118853
SRR1253875_199572
SRR1253861_191196
SRR1253849_197588
SRR1253762_233891
SRR1253750_555159
SRR1253754_400910
SRR1253974_398988
SRR1253974_207281
SRR1253935_562020
SRR1240171_233221
SRR1253931_362513
SRR1240162_614205
SRR1253881_354821
SRR1253878_198047
SRR1253856_208421
SRR1253851_340765
SRR1253764_283420
SRR1240135_185139
SRR1253975_124845
SRR1253691_338971
SRR1240170_587234
SRR1253872_97816
SRR1253754_403462
SRR1253754_354241
SRR1253750_77086
SRR1253690_222046
SRR1253877_207824
SRR1253873_204912
SRR1253846_205368
SRR1253763_529543
SRR1253976_259752
SRR1253935_70496
SRR1253753_114778
SRR1253751_400825
SRR1253751_181360
SRR1253750_604352
SRR1253750_392716
SRR1253745_338109
SRR1253745_21902
SRR1253742_687773
SRR1253742_266083
SRR1253691_292440
SRR1253690_618873
SRR1253690_4758
SRR1240171_296945
SRR1253906_676460
SRR1253895_346073
SRR1253893_221762
SRR1240162_470480
SRR1253882_197455
SRR1253872_363438
SRR1253869_228656
SRR1253869_256030
SRR1253861_183081
SRR1253861_127883
SRR1253858_317832
SRR1253858_24631
SRR1253857_79617
SRR1253855_89798
SRR1253854_89538
SRR1253852_882996
SRR1253849_140405
SRR1253849_75987
SRR1253848_496582
SRR1253761_207803
SRR1240136_136221
SRR1240136_134571
SRR1240135_648821
SRR1253976_373870
SRR1253975_26676
SRR1253974_73681
SRR1253935_325884
SRR1253935_426350
SRR1253756_328241
SRR1253756_327442
SRR1253756_325689
SRR1253756_299925
SRR1253756_248296
SRR1253756_86855
SRR1253754_321823
SRR1253754_600828
SRR1253754_454619
SRR1253750_369696
SRR1253750_316985
SRR1253747_433550
SRR1253747_394008
SRR1253747_392384
SRR1253746_15188
SRR1253745_402306
SRR1253745_355045
SRR1253745_311313
SRR1253744_353159
SRR1253743_363757
SRR1253743_79423
SRR1253742_725641
SRR1253742_500842
SRR1253699_393334
SRR1253698_267509
SRR1253697_29685
SRR1253693_182891
SRR1253693_168968
SRR1253693_109528
SRR1253692_41340
SRR1240170_150609
SRR1240170_304979
SRR1240169_600328
SRR1240169_173441
SRR1253898_218261
SRR1253895_8858
SRR1253894_541047
SRR1253894_529554
SRR1253894_282421
SRR1253894_484449
SRR1253894_220785
SRR1253894_143874
SRR1253893_395496
SRR1253893_367129
SRR1253893_589617
SRR1253893_142208
SRR1240165_603588
SRR1240165_502274
SRR1240164_91032
SRR1240163_135578
SRR1253891_261799
SRR1253891_232090
SRR1253890_393686
SRR1253890_6640
SRR1253889_551439
SRR1253888_281330
SRR1253883_263688
SRR1253883_23333
SRR1253882_188796
SRR1253881_30406
SRR1253880_353766
SRR1253879_165965
SRR1253877_477218
SRR1253875_313767
SRR1253874_209700
SRR1253873_164122
SRR1253873_462082
SRR1253872_410343
SRR1253872_317214
SRR1253870_174135
SRR1253869_407978
SRR1253866_39648
SRR1253864_762029
SRR1253864_66919
SRR1253861_387128
SRR1253861_224957
SRR1253860_346519
SRR1253860_291562
SRR1253857_621994
SRR1253857_197827
SRR1253857_197068
SRR1253857_3692
SRR1253856_376959
SRR1253853_241350
SRR1253852_761330
SRR1253850_32803
SRR1253848_251589
SRR1253847_350467
SRR1253847_162203
SRR1253845_558029
SRR1253845_555370
SRR1253764_49204
SRR1253763_448984
SRR1253763_355692
SRR1253763_316415
SRR1253762_383638
SRR1253762_179512
SRR1253760_250248
SRR1253760_61700
SRR1253759_191312
SRR1253759_494603
SRR1253759_173976
SRR1240161_464156
SRR1240161_236656
SRR1240161_199995
SRR1240135_157749
SRR1253935_71775
SRR1253861_53883
SRR1240135_196393
SRR1253935_270211
SRR1253758_22441
SRR1253756_51784
SRR1253742_318086
SRR1253895_246653
SRR1253894_641181
SRR1253894_275760
SRR1253893_388805
SRR1253893_365191
SRR1253891_346218
SRR1253880_141930
SRR1253865_488480
SRR1253861_375835
SRR1253860_118007
SRR1253851_339698
SRR1253845_339772
SRR1240134_148364
SRR1253873_511892
SRR1253866_139438
SRR1253975_229771
SRR1253758_341470
SRR1253757_287399
SRR1253755_258411
SRR1253746_599964
SRR1253745_200243
SRR1253745_172743
SRR1253740_235419
SRR1253691_330760
SRR1240171_71696
SRR1253931_196095
SRR1253895_407396
SRR1253893_681478
SRR1240162_530521
SRR1253892_298585
SRR1253890_512952
SRR1253890_508585
SRR1253882_130109
SRR1253881_321777
SRR1253865_182516
SRR1253859_42561
SRR1253857_70571
SRR1253856_374297
SRR1253852_28408
SRR1253849_54125
SRR1253759_275099
SRR1240137_448784
SRR1253975_7879
SRR1253974_511774
SRR1253974_129361
SRR1253935_599848
SRR1253758_554616
SRR1253758_297767
SRR1253757_94849
SRR1253757_3013
SRR1253756_324713
SRR1253756_318968
SRR1253755_482974
SRR1253755_312450
SRR1253755_280971
SRR1253755_239168
SRR1253755_177740
SRR1253755_467105
SRR1253755_96999
SRR1253755_46291
SRR1253754_584190
SRR1253754_503877
SRR1253754_478754
SRR1253754_303444
SRR1253754_290178
SRR1253754_319566
SRR1253753_19702
SRR1253753_4548
SRR1253751_546504
SRR1253751_202805
SRR1253750_372012
SRR1253750_195883
SRR1253749_120052
SRR1253749_92903
SRR1253748_167477
SRR1253747_322400
SRR1253747_405310
SRR1253746_361006
SRR1253746_231227
SRR1253746_176119
SRR1253746_240149
SRR1253745_406437
SRR1253745_388057
SRR1253745_219848
SRR1253744_212695
SRR1253743_179947
SRR1253743_544415
SRR1253743_443044
SRR1253742_458182
SRR1253742_376256
SRR1253741_144123
SRR1253741_99813
SRR1253740_158308
SRR1253699_4648
SRR1253698_279819
SRR1253694_123815
SRR1253693_499548
SRR1253693_292275
SRR1253693_47760
SRR1253693_491647
SRR1253691_435241
SRR1253691_277004
SRR1253691_88035
SRR1253690_786913
SRR1253690_527751
SRR1240172_239501
SRR1240171_76094
SRR1240169_340792
SRR1253934_242200
SRR1253934_166351
SRR1253933_39020
SRR1253932_164712
SRR1253932_122754
SRR1253932_13838
SRR1253931_396106
SRR1253931_139694
SRR1253931_156126
SRR1253907_163678
SRR1253906_204473
SRR1253905_175207
SRR1253904_69144
SRR1253903_97267
SRR1253900_201962
SRR1253897_776233
SRR1253896_349099
SRR1253896_194169
SRR1253895_216655
SRR1253895_176056
SRR1253894_641663
SRR1253894_600629
SRR1253894_367439
SRR1253894_125073
SRR1253894_462145
SRR1253893_624818
SRR1253893_455796
SRR1253893_530588
SRR1240165_180369
SRR1240164_77337
SRR1253892_248865
SRR1253891_318852
SRR1253891_244234
SRR1253890_421255
SRR1253890_262930
SRR1253890_133145
SRR1253889_636876
SRR1253889_612841
SRR1253889_122864
SRR1253889_77574
SRR1253889_543271
SRR1253889_476463
SRR1253889_249138
SRR1253888_166872
SRR1253888_242364
SRR1253883_34052
SRR1253883_75936
SRR1253883_515
SRR1253882_147641
SRR1253881_332275
SRR1253881_115610
SRR1253881_111585
SRR1253881_368910
SRR1253881_209911
SRR1253880_331071
SRR1253880_129346
SRR1253880_92731
SRR1253880_85583
SRR1253878_230114
SRR1253878_159836
SRR1253877_383374
SRR1253877_271813
SRR1253876_306263
SRR1253876_300853
SRR1253876_201051
SRR1253876_124106
SRR1253875_56587
SRR1253873_51048
SRR1253873_43711
SRR1253872_474943
SRR1253872_365514
SRR1253872_457685
SRR1253872_16728
SRR1253871_227926
SRR1253871_115193
SRR1253868_236944
SRR1253868_104883
SRR1253868_194584
SRR1253867_314130
SRR1253865_478229
SRR1253865_819075
SRR1253865_367307
SRR1253864_402378
SRR1253864_49228
SRR1253863_195066
SRR1253862_184429
SRR1253861_145523
SRR1253859_248200
SRR1253857_652657
SRR1253857_314943
SRR1253857_222122
SRR1253856_505938
SRR1253855_462990
SRR1253849_446466
SRR1253848_183083
SRR1253848_264927
SRR1253847_247727
SRR1253845_142333
SRR1253845_123845
SRR1253763_276325
SRR1253763_60017
SRR1253763_501753
SRR1253763_305951
SRR1253762_600003
SRR1253762_186933
SRR1253761_272810
SRR1253760_103400
SRR1253759_470978
SRR1253759_346056
SRR1253759_262070
SRR1253759_237327
SRR1253759_208076
SRR1253759_153097
SRR1240161_482994
SRR1240161_253308
SRR1240161_108206
SRR1240137_349629
SRR1240136_345369
SRR1240135_559415
SRR1240134_429846
SRR1253692_205266
SRR1253890_118610
SRR1253763_127253
SRR1253974_621030
SRR1253757_181741
SRR1253756_199563
SRR1253753_159813
SRR1253751_323520
SRR1253751_222444
SRR1253748_248027
SRR1253744_182932
SRR1253743_303868
SRR1253694_640018
SRR1253693_46392
SRR1253690_269524
SRR1240169_319292
SRR1240168_206828
SRR1240167_73066
SRR1253901_41621
SRR1253896_145029
SRR1253895_131032
SRR1253894_325671
SRR1240165_3602
SRR1253892_278687
SRR1253891_273807
SRR1253891_197827
SRR1253890_329062
SRR1253889_405212
SRR1253880_349883
SRR1253877_370172
SRR1253873_351953
SRR1253872_417342
SRR1253867_577359
SRR1253858_165533
SRR1253856_211813
SRR1253855_183879
SRR1253849_456640
SRR1253763_135665
SRR1253763_65973
SRR1253759_151813
SRR1253759_37126
SRR1240161_452180
SRR1253692_40880
SRR1253754_579495
SRR1253747_230729
SRR1240170_470489
SRR1240169_245020
SRR1253905_534826
SRR1253904_265702
SRR1253900_55080
SRR1253894_367384
SRR1240166_340144
SRR1253881_338305
SRR1253879_229303
SRR1253872_201409
SRR1253854_432630
SRR1253693_115506
SRR1253893_695508
SRR1253863_36389
SRR1253974_622274
SRR1253757_75623
SRR1253746_413549
SRR1253745_277873
SRR1253742_474208
SRR1253695_127356
SRR1253931_478365
SRR1240165_285020
SRR1240165_284989
SRR1253892_234483
SRR1253889_315069
SRR1253876_460205
SRR1253875_196502
SRR1253859_129319
SRR1253845_307323
SRR1253761_232011
SRR1253858_121546
SRR1253976_407635
SRR1253976_135315
SRR1253975_210944
SRR1253974_711351
SRR1253974_308389
SRR1253974_139751
SRR1253935_456180
SRR1253935_112901
SRR1253935_112886
SRR1253756_70292
SRR1253755_248732
SRR1253754_175423
SRR1253749_295637
SRR1253747_441321
SRR1253747_262477
SRR1253746_53163
SRR1253744_288077
SRR1253743_3985
SRR1253742_515057
SRR1253741_92455
SRR1253691_733635
SRR1240172_57082
SRR1240170_378560
SRR1240170_281154
SRR1240170_146883
SRR1240170_180338
SRR1240167_230337
SRR1253934_220927
SRR1253933_309996
SRR1253932_564764
SRR1253906_165413
SRR1253899_479657
SRR1253895_323609
SRR1253895_135636
SRR1253894_431058
SRR1253893_302891
SRR1240165_565737
SRR1240164_298965
SRR1240164_264752
SRR1240163_277344
SRR1253892_218232
SRR1253892_287999
SRR1253890_296478
SRR1253888_263649
SRR1253882_245344
SRR1253881_378054
SRR1253881_340946
SRR1253881_83850
SRR1253880_312606
SRR1253877_309814
SRR1253875_239045
SRR1253874_206882
SRR1253873_515974
SRR1253873_543028
SRR1253872_3030
SRR1253871_194274
SRR1253870_217142
SRR1253869_54173
SRR1253867_206886
SRR1253867_64950
SRR1253866_218760
SRR1253865_387714
SRR1253861_37106
SRR1253861_307891
SRR1253860_44371
SRR1253859_373652
SRR1253859_41695
SRR1253858_124380
SRR1253857_465697
SRR1253857_460831
SRR1253856_35132
SRR1253856_272562
SRR1253856_66505
SRR1253854_186574
SRR1253850_14386
SRR1253850_12203
SRR1253850_357332
SRR1253849_187165
SRR1253849_30095
SRR1253848_336025
SRR1253848_300979
SRR1253847_308777
SRR1253845_380345
SRR1253763_168609
SRR1253762_432471
SRR1253761_68932
SRR1253761_143696
SRR1253761_100963
SRR1253759_325006
SRR1253759_424078
SRR1253759_252597
SRR1240135_169076
SRR1253690_640002
SRR1253881_401730
SRR1253863_156076
SRR1253764_296361
SRR1253763_252263
SRR1253976_214984
SRR1253975_286489
SRR1253974_739522
SRR1253974_91000
SRR1253757_210678
SRR1253755_322271
SRR1253746_481405
SRR1253746_299750
SRR1253746_164947
SRR1253743_222171
SRR1253903_474180
SRR1253896_322380
SRR1253896_280315
SRR1253893_217457
SRR1253890_222795
SRR1253889_469135
SRR1253889_96537
SRR1253882_256080
SRR1253881_497315
SRR1253881_408121
SRR1253880_356224
SRR1253880_382220
SRR1253870_134574
SRR1253868_399570
SRR1253864_439571
SRR1253864_379881
SRR1253861_118535
SRR1253857_370356
SRR1253854_117987
SRR1253850_10277
SRR1253850_255034
SRR1253762_866
SRR1240137_125980
SRR1253976_185164
SRR1253974_663609
SRR1253974_648487
SRR1253756_268953
SRR1253749_296107
SRR1253749_286288
SRR1253749_242271
SRR1253698_485287
SRR1253693_266268
SRR1240171_343327
SRR1240168_28170
SRR1253932_214416
SRR1253931_84534
SRR1253906_156450
SRR1253893_757199
SRR1240166_246016
SRR1240166_936661
SRR1240165_2520
SRR1253890_383691
SRR1253883_158058
SRR1253881_37464
SRR1253879_268467
SRR1253876_397306
SRR1253876_329248
SRR1253873_472762
SRR1253873_104812
SRR1253860_175819
SRR1253859_149747
SRR1253854_425099
SRR1253849_324539
SRR1253848_527062
SRR1253845_321988
SRR1253845_449318
SRR1253763_382154
SRR1253763_531654
SRR1253762_408708
SRR1253762_53246
SRR1240135_415273
SRR1240134_64123
SRR1240134_7042
SRR1253692_316733
SRR1253974_522396
SRR1253935_242914
SRR1253755_13005
SRR1253754_264365
SRR1253754_202665
SRR1253753_321265
SRR1253751_25426
SRR1253745_307617
SRR1253743_257509
SRR1253697_138679
SRR1253693_23179
SRR1253693_475740
SRR1253692_74030
SRR1253934_268992
SRR1253905_620936
SRR1253904_418406
SRR1253895_224299
SRR1240166_318843
SRR1240163_224909
SRR1253890_391897
SRR1253889_311018
SRR1253883_66521
SRR1253881_535
SRR1253881_419591
SRR1253881_391654
SRR1253881_350145
SRR1253881_335627
SRR1253880_107829
SRR1253880_105068
SRR1253880_293592
SRR1253880_55401
SRR1253879_269981
SRR1253878_92805
SRR1253876_208085
SRR1253875_54043
SRR1253874_229797
SRR1253873_252068
SRR1253873_519262
SRR1253873_99935
SRR1253872_300562
SRR1253870_167212
SRR1253868_333972
SRR1253862_46704
SRR1253861_324430
SRR1253861_81901
SRR1253859_269411
SRR1253859_318416
SRR1253859_43288
SRR1253858_97283
SRR1253857_659740
SRR1253857_601629
SRR1253857_435634
SRR1253857_91173
SRR1253857_191690
SRR1253850_293643
SRR1253849_163945
SRR1253847_303330
SRR1253762_668741
SRR1253762_172517
SRR1253761_18119
SRR1253759_262620
SRR1240161_155861
SRR1240137_104626
SRR1240137_11294
SRR1253866_348487
SRR1253856_120110
SRR1240161_208350
SRR1240135_130187
SRR1240166_545539
SRR1253880_421790
SRR1253864_190631
SRR1253851_38013
SRR1253845_545701
SRR1253764_355475
SRR1253755_505377
SRR1253933_215048
SRR1253932_449089
SRR1253881_373732
SRR1253880_64043
SRR1253762_378812
SRR1240137_19724
SRR1253755_124132
SRR1253742_530627
SRR1253698_436128
SRR1253696_219084
SRR1240168_212074
SRR1253933_207526
SRR1253932_189995
SRR1253894_110006
SRR1240165_220138
SRR1240162_675161
SRR1253892_49993
SRR1240136_164663
SRR1240162_607528
SRR1240161_329786
SRR1253974_466385
SRR1253699_335943
SRR1253976_394077
SRR1253974_590936
SRR1253935_70554
SRR1253935_490243
SRR1253935_93226
SRR1253755_239933
SRR1253755_28445
SRR1253755_271249
SRR1253755_224549
SRR1253754_43092
SRR1253754_305474
SRR1253751_75781
SRR1253749_180247
SRR1253749_125403
SRR1253748_117488
SRR1253748_28238
SRR1253747_438095
SRR1253747_572940
SRR1253744_357439
SRR1253743_45776
SRR1253743_392555
SRR1253743_373694
SRR1253743_372696
SRR1253743_109084
SRR1253742_82093
SRR1253699_409020
SRR1253696_108584
SRR1253693_16762
SRR1253692_115335
SRR1253691_888963
SRR1253691_211689
SRR1253690_595531
SRR1253690_592722
SRR1253690_654522
SRR1240171_127223
SRR1240170_609194
SRR1240170_346001
SRR1240167_146267
SRR1253934_389442
SRR1253933_247797
SRR1253933_214203
SRR1253898_359888
SRR1253896_221611
SRR1253896_189161
SRR1253896_117945
SRR1253895_228491
SRR1253894_521980
SRR1253893_570581
SRR1240166_685620
SRR1240166_603797
SRR1240166_222600
SRR1240165_833899
SRR1240165_525377
SRR1240165_406289
SRR1240165_110134
SRR1240164_80008
SRR1253890_477989
SRR1253890_148315
SRR1253889_524358
SRR1253879_169780
SRR1253879_85086
SRR1253875_90820
SRR1253872_410008
SRR1253872_230527
SRR1253868_153757
SRR1253867_455461
SRR1253866_541085
SRR1253866_165965
SRR1253863_226320
SRR1253863_114406
SRR1253863_243233
SRR1253863_32165
SRR1253861_46886
SRR1253861_113607
SRR1253860_189067
SRR1253859_48301
SRR1253859_16738
SRR1253859_117564
SRR1253857_399267
SRR1253857_330928
SRR1253856_61515
SRR1253852_90060
SRR1253850_264867
SRR1253849_580786
SRR1253848_317417
SRR1253848_196702
SRR1253764_23234
SRR1253763_437565
SRR1253763_260935
SRR1253762_440256
SRR1253762_598301
SRR1253762_510028
SRR1253759_488152
SRR1240137_104410
SRR1240134_514754
SRR1240134_201537
SRR1253860_53841
SRR1253868_240243
SRR1253932_319548
SRR1240165_80694
SRR1253881_506339
SRR1253876_82037
SRR1253859_1829
SRR1253856_400510
SRR1253932_319556
SRR1253906_257073
SRR1253870_208839
SRR1240134_23137
SRR1253896_355482
SRR1253756_138860
SRR1240170_334064
SRR1253900_169301
SRR1253859_390547
SRR1253857_484102
SRR1253860_278778
SRR1253935_494688
SRR1253935_258060
SRR1253757_168115
SRR1253746_65421
SRR1253742_354118
SRR1253693_511855
SRR1253691_671228
SRR1253690_726754
SRR1240170_395872
SRR1240170_239101
SRR1240170_46712
SRR1240168_305983
SRR1240167_394234
SRR1240167_323627
SRR1240167_307145
SRR1253905_485044
SRR1240166_587401
SRR1240165_775243
SRR1253888_2050
SRR1253881_301671
SRR1253881_370842
SRR1253881_292979
SRR1253881_251413
SRR1253881_137399
SRR1253881_93511
SRR1253880_384776
SRR1253871_113175
SRR1253868_11210
SRR1253864_491813
SRR1253859_340086
SRR1253858_346139
SRR1253857_654454
SRR1253857_348105
SRR1253856_442198
SRR1253853_402378
SRR1253850_145269
SRR1253848_190487
SRR1253848_157176
SRR1253847_13018
SRR1240161_369393
SRR1240137_216517
SRR1240135_97208
SRR1253975_316480
SRR1253758_137880
SRR1253751_248835
SRR1253743_73683
SRR1253859_387831
SRR1253858_392101
SRR1240135_145498
SRR1253862_142318
SRR1253690_738750
SRR1240169_478305
SRR1253894_76131
SRR1253857_301808
SRR1253846_175769
SRR1253878_221320
SRR1253976_234156
SRR1253975_182644
SRR1253974_716067
SRR1253974_580108
SRR1253935_571970
SRR1253755_277797
SRR1253754_125727
SRR1253742_547155
SRR1253690_507575
SRR1240171_261041
SRR1240169_202841
SRR1240169_172322
SRR1240169_593170
SRR1253934_296108
SRR1253934_233334
SRR1253907_47020
SRR1240165_638332
SRR1240164_232062
SRR1253882_234
SRR1253881_108922
SRR1253881_363015
SRR1253881_337152
SRR1253880_61662
SRR1253880_58881
SRR1253876_485967
SRR1253873_307743
SRR1253868_253085
SRR1253866_228104
SRR1253865_929960
SRR1253864_516215
SRR1253859_90767
SRR1253857_452261
SRR1253857_78331
SRR1253856_323171
SRR1253856_32460
SRR1253854_289863
SRR1253847_82894
SRR1253764_11562
SRR1253760_198127
SRR1240137_195330
SRR1240137_281530
SRR1240134_450392
SRR1240134_295697
SRR1253899_137707
SRR1253858_191028
SRR1253881_134004
SRR1240136_325530
SRR1253974_564053
SRR1253974_471046
SRR1253895_289403
SRR1253880_356188
SRR1253875_69777
SRR1253873_536435
SRR1253858_175528
SRR1240135_425614
SRR1253690_511468
SRR1240165_571483
SRR1253881_463631
SRR1253880_238679
SRR1253858_388124
SRR1253975_248301
SRR1253974_69718
SRR1253974_647040
SRR1253974_259699
SRR1253935_48150
SRR1253757_27495
SRR1253756_3569
SRR1253754_354145
SRR1253752_69525
SRR1253747_291166
SRR1253745_361411
SRR1253745_67377
SRR1253693_505372
SRR1253692_340270
SRR1253691_611183
SRR1253691_378259
SRR1253691_37992
SRR1240169_443047
SRR1240168_447058
SRR1240168_79642
SRR1253934_245787
SRR1253904_348976
SRR1253904_157808
SRR1253900_499281
SRR1253896_29177
SRR1253894_126814
SRR1253894_636002
SRR1253893_83706
SRR1240166_482758
SRR1240165_170985
SRR1253891_238420
SRR1253891_344269
SRR1253890_288904
SRR1253889_392069
SRR1253889_384134
SRR1253883_132502
SRR1253881_516622
SRR1253881_243862
SRR1253878_93944
SRR1253874_5166
SRR1253873_323638
SRR1253871_19946
SRR1253870_128674
SRR1253869_44600
SRR1253868_330299
SRR1253864_125019
SRR1253863_160175
SRR1253860_148473
SRR1253859_109777
SRR1253856_144988
SRR1253856_19081
SRR1253850_41404
SRR1253849_486370
SRR1253849_324210
SRR1253845_373096
SRR1253764_186815
SRR1253764_104530
SRR1253763_538344
SRR1253763_264673
SRR1253762_173335
SRR1253762_330008
SRR1253760_119358
SRR1253759_51587
SRR1240137_4370
SRR1240136_301198
SRR1240135_440437
SRR1240135_234484
SRR1240135_138870
SRR1240134_54545
SRR1253975_108016
SRR1253882_78044
SRR1253976_261589
SRR1253975_324857
SRR1253975_308686
SRR1253975_93296
SRR1253975_61633
SRR1253974_571676
SRR1253974_397122
SRR1253974_259135
SRR1253974_458514
SRR1253935_558181
SRR1253935_448655
SRR1253935_159358
SRR1253758_340983
SRR1253757_139003
SRR1253757_170030
SRR1253756_334521
SRR1253756_308450
SRR1253756_92403
SRR1253755_209497
SRR1253754_610933
SRR1253754_523468
SRR1253754_222376
SRR1253754_82701
SRR1253754_53326
SRR1253752_323933
SRR1253749_192417
SRR1253748_180132
SRR1253747_312089
SRR1253747_277278
SRR1253747_355283
SRR1253746_95169
SRR1253745_224916
SRR1253745_139767
SRR1253744_138491
SRR1253744_88772
SRR1253744_162371
SRR1253743_541842
SRR1253743_472473
SRR1253743_47139
SRR1253743_25904
SRR1253743_359035
SRR1253742_255627
SRR1253698_418323
SRR1253697_93829
SRR1253696_312847
SRR1253694_272716
SRR1253694_35713
SRR1253693_296637
SRR1253692_144840
SRR1253691_706348
SRR1253691_705472
SRR1253691_504506
SRR1253691_466864
SRR1253691_328691
SRR1253690_655526
SRR1253690_650274
SRR1240171_334834
SRR1240170_84758
SRR1240169_517425
SRR1240168_37905
SRR1240167_426436
SRR1240167_132128
SRR1253934_264504
SRR1253934_133621
SRR1253934_113956
SRR1253932_433627
SRR1253932_119472
SRR1253931_488956
SRR1253931_290662
SRR1253931_272957
SRR1253931_82716
SRR1253931_545160
SRR1253930_106710
SRR1253906_716386
SRR1253898_340221
SRR1253896_265058
SRR1253896_235106
SRR1253895_400105
SRR1253894_486455
SRR1253894_163664
SRR1253894_219903
SRR1253894_163994
SRR1253893_578779
SRR1253893_393619
SRR1253893_107417
SRR1253893_718044
SRR1253893_666155
SRR1253893_288083
SRR1253893_109850
SRR1240166_526030
SRR1240166_441977
SRR1240166_772271
SRR1240165_846348
SRR1240165_146578
SRR1240163_140642
SRR1240162_536412
SRR1240162_346949
SRR1240162_126298
SRR1253891_200906
SRR1253891_311745
SRR1253891_173703
SRR1253891_196
SRR1253890_317677
SRR1253889_322615
SRR1253889_118241
SRR1253889_95112
SRR1253889_156896
SRR1253889_78741
SRR1253888_324283
SRR1253888_232647
SRR1253888_24243
SRR1253888_312192
SRR1253883_192929
SRR1253883_21608
SRR1253883_255506
SRR1253883_149380
SRR1253882_93305
SRR1253882_73516
SRR1253882_237992
SRR1253881_303158
SRR1253881_197624
SRR1253881_154007
SRR1253881_124756
SRR1253881_512862
SRR1253881_409860
SRR1253881_374535
SRR1253881_334251
SRR1253881_331413
SRR1253881_322101
SRR1253881_240671
SRR1253880_105528
SRR1253880_61861
SRR1253880_49340
SRR1253879_200282
SRR1253879_70950
SRR1253879_276499
SRR1253879_106799
SRR1253877_515271
SRR1253877_494692
SRR1253877_366569
SRR1253877_302091
SRR1253876_492773
SRR1253876_489346
SRR1253876_155568
SRR1253876_15778
SRR1253873_374894
SRR1253873_68560
SRR1253872_198702
SRR1253871_165496
SRR1253869_251547
SRR1253869_459731
SRR1253869_345948
SRR1253868_289607
SRR1253867_320455
SRR1253866_319864
SRR1253866_287631
SRR1253865_818465
SRR1253865_747201
SRR1253865_325215
SRR1253864_159787
SRR1253864_117313
SRR1253864_226899
SRR1253863_75584
SRR1253863_17357
SRR1253863_36829
SRR1253862_75817
SRR1253862_156831
SRR1253861_384022
SRR1253861_173498
SRR1253861_143264
SRR1253861_291312
SRR1253860_174063
SRR1253860_22373
SRR1253860_171789
SRR1253859_354426
SRR1253859_88519
SRR1253859_229397
SRR1253859_143150
SRR1253858_340619
SRR1253858_154501
SRR1253858_140784
SRR1253858_58570
SRR1253858_44953
SRR1253858_16396
SRR1253858_395787
SRR1253858_238549
SRR1253857_512815
SRR1253857_354176
SRR1253857_42718
SRR1253857_658561
SRR1253856_151324
SRR1253856_146120
SRR1253854_236331
SRR1253853_1049231
SRR1253853_729196
SRR1253853_340682
SRR1253852_616491
SRR1253851_251541
SRR1253850_216500
SRR1253849_467481
SRR1253849_425668
SRR1253849_296220
SRR1253849_569645
SRR1253848_184693
SRR1253847_317090
SRR1253764_36359
SRR1253763_294716
SRR1253763_479020
SRR1253763_43823
SRR1253762_205173
SRR1253762_155479
SRR1253762_637558
SRR1253761_229916
SRR1253760_27498
SRR1253759_446440
SRR1253759_103745
SRR1240137_417088
SRR1240137_55398
SRR1240136_366476
SRR1240136_262390
SRR1240136_176405
SRR1240135_537511
SRR1240135_292681
SRR1240135_69290
SRR1240134_430470
SRR1240134_408551
SRR1240134_370319
SRR1240134_4088
SRR1240134_351326
SRR1253975_334415
SRR1253758_492210
SRR1253755_165079
SRR1253755_420876
SRR1253755_335193
SRR1253755_141504
SRR1253746_239816
SRR1253743_309907
SRR1253699_24015
SRR1240172_263644
SRR1253932_405153
SRR1253932_202242
SRR1253894_88942
SRR1240166_893100
SRR1240166_303720
SRR1253892_161941
SRR1253890_306282
SRR1253883_79344
SRR1253882_57823
SRR1253881_302793
SRR1253877_309530
SRR1253874_13879
SRR1253869_247258
SRR1253865_235736
SRR1253860_126781
SRR1253859_177764
SRR1253852_999726
SRR1253851_274164
SRR1253849_466999
SRR1253760_188286
SRR1253759_26397
SRR1240136_200195
SRR1240135_51625
SRR1240134_77306
SRR1253693_29358
SRR1253692_306180
SRR1240172_402723
SRR1240169_8597
SRR1253933_427456
SRR1253930_400123
SRR1253903_119660
SRR1240165_395812
SRR1240165_253349
SRR1240165_161415
SRR1253892_127864
SRR1253889_441979
SRR1253888_18922
SRR1253881_283787
SRR1240161_149220
SRR1253882_91350
SRR1253870_77363
SRR1253862_77745
SRR1253975_132800
SRR1253975_42901
SRR1253974_49627
SRR1253974_564653
SRR1253935_284834
SRR1253758_516991
SRR1253758_162354
SRR1253757_269721
SRR1253757_214539
SRR1253757_205647
SRR1253757_123160
SRR1253757_86107
SRR1253756_6128
SRR1253755_106876
SRR1253755_43431
SRR1253754_381605
SRR1253754_367563
SRR1253754_118179
SRR1253754_245636
SRR1253753_193470
SRR1253753_143083
SRR1253753_49479
SRR1253752_3225
SRR1253751_537369
SRR1253751_536645
SRR1253751_348650
SRR1253751_236898
SRR1253751_28869
SRR1253750_709737
SRR1253750_398370
SRR1253750_247195
SRR1253749_160600
[truncated: 767 more rows]

## Sheet: NPSG_Pro
SRR1240171_49346
SRR1240170_3412
SRR1253893_135781
SRR1253892_179464
SRR1253862_8130
SRR1253861_101624
SRR1253860_335330
SRR1253848_450220
SRR1253848_511188
SRR1253762_673874
SRR1253762_15027
SRR1240136_228146
SRR1253976_112085
SRR1253975_243978
SRR1253758_500093
SRR1253756_304675
SRR1253755_236897
SRR1253755_217210
SRR1253743_33054
SRR1253696_242605
SRR1253696_26831
SRR1253695_441602
SRR1253695_391962
SRR1253694_158282
SRR1253694_516350
SRR1240170_418589
SRR1240168_82556
SRR1240167_367820
SRR1253933_403082
SRR1253932_602399
SRR1253932_176842
SRR1253931_145607
SRR1253905_206342
SRR1253904_333642
SRR1253894_546218
SRR1253894_487073
SRR1253894_142026
SRR1253893_688991
SRR1253893_118577
SRR1253893_238216
SRR1240166_599206
SRR1253891_313135
SRR1253891_146001
SRR1253890_176395
SRR1253890_14375
SRR1253890_173916
SRR1253888_293155
SRR1253883_112198
SRR1253882_187532
SRR1253876_162483
SRR1253870_227996
SRR1253869_42439
SRR1253869_208732
SRR1253868_71816
SRR1253866_59740
SRR1253865_984560
SRR1253865_1067814
SRR1253865_24664
SRR1253863_174412
SRR1253857_346503
SRR1253857_167822
SRR1253856_81007
SRR1253853_439736
SRR1253845_28057
SRR1253764_328430
SRR1253763_528028
SRR1253762_54230
SRR1253761_147925
SRR1253759_460722
SRR1253974_478335
SRR1253974_64361
SRR1253757_67043
SRR1253755_2690
SRR1253755_41941
SRR1253754_72032
SRR1253752_221225
SRR1253747_425376
SRR1253747_311345
SRR1253740_160205
SRR1253696_13500
SRR1253694_596638
SRR1253693_506103
SRR1253692_243675
SRR1253690_201861
SRR1240170_458403
SRR1240170_365628
SRR1240170_283388
SRR1253933_128477
SRR1253906_170116
SRR1253903_245316
SRR1253900_60157
SRR1253898_547936
SRR1253894_123701
SRR1240166_604814
SRR1240165_545212
SRR1240164_175579
SRR1240162_274233
SRR1253889_394856
SRR1253889_389855
SRR1253883_46150
SRR1253882_184059
SRR1253877_35908
SRR1253876_464925
SRR1253871_138699
SRR1253871_96097
SRR1253866_259062
SRR1253865_776792
SRR1253865_386873
SRR1253862_153702
SRR1253861_370603
SRR1253860_72637
SRR1253860_32003
SRR1253857_335357
SRR1253856_557
SRR1253856_386528
SRR1253852_989626
SRR1253851_347431
SRR1253848_298985
SRR1253847_33291
SRR1253764_138013
SRR1253764_31511
SRR1253763_144390
SRR1253763_564202
SRR1253763_401324
SRR1253760_155584
SRR1253759_486943
SRR1253759_324135
SRR1240135_623782
SRR1240134_505690
SRR1253757_76722
SRR1253755_499744
SRR1253754_268969
SRR1253894_259111
SRR1253894_43852
SRR1240166_36113
SRR1253891_45104
SRR1253881_405912
SRR1253876_428103
SRR1253876_330432
SRR1253852_283277
SRR1253850_240128
SRR1253763_294597
SRR1253762_567225
SRR1253762_557258
SRR1253760_305153
SRR1253863_27380
SRR1253742_203669
SRR1253695_318828
SRR1240171_212350
SRR1253906_324310
SRR1253894_163115
SRR1240165_789722
SRR1253892_134833
SRR1253879_142021
SRR1253878_107146
SRR1253877_358798
SRR1253877_99851
SRR1253870_219818
SRR1253865_158286
SRR1253860_77535
SRR1253859_29693
SRR1253853_800822
SRR1253845_598393
SRR1253762_672432
SRR1253760_262237
SRR1240135_183866
SRR1253692_98022
SRR1253881_170368
SRR1253849_10511
SRR1253762_440657
SRR1253935_59533
SRR1253758_199425
SRR1253756_209389
SRR1253756_45381
SRR1253756_333444
SRR1253754_471509
SRR1253754_595391
SRR1253754_560076
SRR1253754_462945
SRR1253754_435875
SRR1253754_192273
SRR1253746_632867
SRR1253745_341493
SRR1253745_282473
SRR1253744_102218
SRR1253742_227756
SRR1253695_246670
SRR1253695_295653
SRR1253693_233810
SRR1253693_232931
SRR1253691_449125
SRR1253690_710011
SRR1240172_339081
SRR1240171_209718
SRR1240169_321695
SRR1240169_497243
SRR1240168_501362
SRR1240167_349874
SRR1253934_180034
SRR1253932_32710
SRR1253930_358983
SRR1253905_612483
SRR1253904_42776
SRR1253900_294916
SRR1253897_231933
SRR1253893_468473
SRR1253893_701043
SRR1253893_350008
SRR1240166_710885
SRR1240166_881210
SRR1240165_761680
SRR1240165_152322
SRR1240162_196921
SRR1253890_287936
SRR1253889_300968
SRR1253889_208086
SRR1253889_338348
SRR1253888_140726
SRR1253881_283763
SRR1253881_99315
SRR1253881_74107
SRR1253881_468409
SRR1253879_160862
SRR1253877_49600
SRR1253870_3613
SRR1253869_426809
SRR1253868_345409
SRR1253865_2335
SRR1253865_749659
SRR1253863_84966
SRR1253863_46126
SRR1253862_34977
SRR1253861_347443
SRR1253859_193698
SRR1253857_115716
SRR1253857_394575
SRR1253856_540250
SRR1253851_139548
SRR1253847_279943
SRR1253764_334352
SRR1253764_301722
SRR1253764_180570
SRR1253764_302699
SRR1253763_471152
SRR1253763_504896
SRR1253763_198761
SRR1253760_75929
SRR1253759_234123
SRR1240134_462927
SRR1240134_175351
SRR1240134_125787
SRR1253974_112183
SRR1253740_41248
SRR1253692_249436
SRR1253889_350585
SRR1253878_71717
SRR1253849_38119
SRR1253849_219102
SRR1253763_396084
SRR1253758_610292
SRR1253758_400717
SRR1253758_231966
SRR1253754_441283
SRR1253747_368712
SRR1253698_105599
SRR1253695_472841
SRR1253693_440610
SRR1253693_85813
SRR1253897_291743
SRR1240166_653042
SRR1253889_331337
SRR1253889_88812
SRR1253860_295116
SRR1253860_248735
SRR1253859_271558
SRR1253856_530123
SRR1253851_197118
SRR1253763_215815
SRR1240134_108596
SRR1253758_579717
SRR1253747_416245
SRR1253743_326689
SRR1253742_610101
SRR1253698_2349
SRR1253903_433221
SRR1253900_20428
SRR1253899_197139
SRR1253898_601479
SRR1253895_187566
SRR1253891_317759
SRR1253876_218816
SRR1253871_120153
SRR1253855_272755
SRR1253845_77093
SRR1253763_245804
SRR1253760_328402
SRR1240135_325158
SRR1240134_95563
SRR1253895_76042
SRR1253894_561110
SRR1253975_266785
SRR1253755_399760
SRR1253755_348975
SRR1253754_599542
SRR1253754_463338
SRR1253752_327266
SRR1253748_337708
SRR1253747_523141
SRR1253746_558821
SRR1253746_441307
SRR1253743_195762
SRR1253743_257828
SRR1253740_222555
SRR1253740_131659
SRR1253699_271675
SRR1253699_75282
SRR1253697_46258
SRR1253695_271761
SRR1253694_41375
SRR1253693_23167
SRR1253691_760414
SRR1253691_705348
SRR1253691_563059
SRR1253690_631740
SRR1240170_298710
SRR1240169_437587
SRR1240169_360588
SRR1240169_647941
SRR1240168_103009
SRR1253932_318550
SRR1253905_596025
SRR1253904_175732
SRR1253901_132107
SRR1253900_252896
SRR1253899_493321
SRR1253898_610168
SRR1253898_328323
SRR1253897_576351
SRR1253897_388033
SRR1253897_160867
SRR1253896_227779
SRR1253894_452124
SRR1253894_661077
SRR1240166_359945
SRR1240166_475597
SRR1253890_251315
SRR1253889_436102
SRR1253883_304931
SRR1253882_220626
SRR1253881_36910
SRR1253876_481409
SRR1253876_419122
SRR1253875_284536
SRR1253866_321567
SRR1253865_61761
SRR1253865_576753
SRR1253864_596843
SRR1253864_565591
SRR1253864_82127
SRR1253864_81200
SRR1253861_169430
SRR1253859_311899
SRR1253859_73216
SRR1253858_221153
SRR1253854_34178
SRR1253852_431777
SRR1253849_106858
SRR1253847_83252
SRR1253764_346331
SRR1253759_314275
SRR1240135_436297
SRR1253974_740072
SRR1253755_608
SRR1253754_576773
SRR1253750_603150
SRR1253750_575875
SRR1253746_561070
SRR1253745_113593
SRR1253742_671040
SRR1253742_57064
SRR1253742_540014
SRR1253699_434341
SRR1253697_43896
SRR1253696_256959
SRR1253695_97911
SRR1253693_16842
SRR1253692_421108
SRR1253691_897412
SRR1253690_731365
SRR1253690_706326
SRR1253690_365799
SRR1253690_174171
SRR1240170_393726
SRR1253934_7944
SRR1253907_381151
SRR1253907_325304
SRR1253904_362178
SRR1253904_147770
SRR1253902_291479
SRR1253900_587380
SRR1253899_478401
SRR1253894_282498
SRR1253894_185981
SRR1253893_487816
SRR1240166_699291
SRR1240165_850664
SRR1240165_231439
SRR1240164_104767
SRR1240162_612558
SRR1240162_559431
SRR1253891_25493
SRR1253890_224214
SRR1253890_31809
SRR1253889_457737
SRR1253880_65057
SRR1253877_495769
SRR1253876_366178
SRR1253875_198171
SRR1253875_189745
SRR1253875_173111
SRR1253874_94059
SRR1253873_165596
SRR1253873_318000
SRR1253873_288310
SRR1253872_365239
SRR1253871_193094
SRR1253868_221853
SRR1253865_943654
SRR1253865_426469
SRR1253864_729782
SRR1253863_58360
SRR1253861_143658
SRR1253859_450855
SRR1253854_130994
SRR1253853_1070471
SRR1253853_935426
SRR1253851_169225
SRR1253851_20919
SRR1253849_541304
SRR1253848_299384
SRR1253846_95845
SRR1253845_48657
SRR1253764_252773
SRR1253762_263510
SRR1253760_118113
SRR1253759_436518
SRR1240137_248344
SRR1253975_206797
SRR1253974_161305
SRR1253935_35725
SRR1253758_439947
SRR1253757_104232
SRR1253757_183992
SRR1253755_124212
SRR1253755_366248
SRR1253754_153205
SRR1253753_196976
SRR1253747_205323
SRR1253747_134403
SRR1253746_43179
SRR1253744_268588
SRR1253743_446249
SRR1253742_362206
SRR1253698_62928
SRR1253698_11180
SRR1253698_301696
SRR1253696_176894
SRR1253695_84933
SRR1253694_452602
SRR1253693_241112
SRR1253692_58616
SRR1253691_427123
SRR1253691_561036
SRR1253691_63964
SRR1240170_478023
SRR1253934_214753
SRR1253904_247364
SRR1253901_310502
SRR1253901_101494
SRR1253900_320789
SRR1253894_471159
SRR1253894_37942
SRR1253893_715454
SRR1240166_580436
SRR1240166_355278
SRR1240166_244353
SRR1240166_609826
SRR1253890_74467
SRR1253890_464947
SRR1253880_42137
SRR1253878_200321
SRR1253876_327054
SRR1253873_122872
SRR1253873_225758
SRR1253872_193233
SRR1253872_71159
SRR1253871_256829
SRR1253871_30075
SRR1253869_55917
SRR1253864_9394
SRR1253861_263639
SRR1253857_126138
SRR1253857_145
SRR1253857_192181
SRR1253848_254178
SRR1253847_189383
SRR1253846_284933
SRR1253845_243116
SRR1253763_558222
SRR1253763_491879
SRR1253762_294473
SRR1253762_516796
SRR1253761_221915
SRR1240137_447783
SRR1240137_345813
SRR1240137_223137
SRR1240135_394080
SRR1240134_173477
SRR1240134_192501
SRR1253932_560532
SRR1253872_334216
SRR1253857_227888
SRR1253846_230179
SRR1253764_258355
SRR1253878_30031
SRR1253976_363784
SRR1253935_618540
SRR1253756_272631
SRR1253746_438055
SRR1253743_514972
SRR1253742_661332
SRR1253697_245201
SRR1240169_425662
SRR1240168_146196
SRR1253931_154806
SRR1253904_71085
SRR1253896_282792
SRR1253895_84926
SRR1253893_588578
SRR1253890_168571
SRR1253889_144566
SRR1253889_68817
SRR1253888_240196
SRR1253888_307085
SRR1253880_305073
SRR1253879_220204
SRR1253877_473221
SRR1253877_251208
SRR1253876_514428
SRR1253876_245056
SRR1253876_75253
SRR1253873_405003
SRR1253869_188962
SRR1253866_550991
SRR1253864_252689
SRR1253861_209025
SRR1253857_240613
SRR1253851_196420
SRR1253850_14323
SRR1253849_120618
SRR1253845_109088
SRR1253763_309730
SRR1253762_65147
SRR1253761_178338
SRR1253759_482736
SRR1240136_245389
SRR1253882_230069
SRR1253974_737012
SRR1253755_453880
SRR1253754_378384
SRR1253754_95442
SRR1253743_355752
SRR1253900_422191
SRR1253896_96400
SRR1253893_771673
SRR1253891_337300
SRR1253888_287474
SRR1253883_234073
SRR1253881_99311
SRR1253880_22678
SRR1253877_179308
SRR1253875_150241
SRR1253873_450343
SRR1253869_195070
SRR1253869_48429
SRR1253861_382566
SRR1253861_72584
SRR1253846_189478
SRR1253845_479265
SRR1253845_390485
SRR1253762_350393
SRR1253762_304202
SRR1253760_86527
SRR1240161_34514
SRR1253905_541393
SRR1253893_772789
SRR1253890_121052
SRR1253888_203490
SRR1240134_118531
SRR1253974_209067
SRR1253974_294614
SRR1253758_174398
SRR1253758_46097
SRR1253758_334225
SRR1253757_182886
SRR1253756_17887
SRR1253754_457077
SRR1253754_440550
SRR1253754_23863
SRR1253754_30990
SRR1253750_260237
SRR1253747_505636
SRR1253746_188363
SRR1253746_135015
SRR1253744_345826
SRR1253743_397902
SRR1253742_422462
SRR1253741_79745
SRR1253740_114837
SRR1253740_19459
SRR1253698_41743
SRR1253695_184915
SRR1253694_574407
SRR1253694_505657
SRR1253694_370031
SRR1253694_284861
SRR1253690_260694
SRR1240172_328244
SRR1240172_15317
SRR1240170_704101
SRR1240170_61853
SRR1240169_481945
SRR1240169_474063
SRR1253933_58170
SRR1253933_11370
SRR1253932_34765
SRR1253931_182756
SRR1253931_71381
SRR1253899_616283
SRR1253899_466445
SRR1253899_345787
SRR1253898_116498
SRR1253896_339547
SRR1253896_54002
SRR1253895_267372
SRR1253894_599490
SRR1253894_152256
SRR1253893_358945
SRR1253893_98080
SRR1253893_793873
SRR1253893_207505
SRR1240166_26575
SRR1240165_877315
SRR1240165_526279
SRR1240163_257912
SRR1253892_14937
SRR1253890_512381
SRR1253889_516277
SRR1253888_181671
SRR1253883_16616
SRR1253881_242214
SRR1253880_420808
SRR1253877_505141
SRR1253877_468217
SRR1253877_219340
SRR1253877_522484
SRR1253876_216288
SRR1253875_189846
SRR1253875_294164
SRR1253874_61895
SRR1253873_326488
SRR1253871_216678
SRR1253868_320930
SRR1253867_461367
SRR1253866_392844
SRR1253866_236997
SRR1253865_963219
SRR1253865_282744
SRR1253864_681314
SRR1253864_605120
SRR1253863_33638
SRR1253861_295254
SRR1253860_335389
SRR1253860_280557
SRR1253860_209090
SRR1253858_276187
SRR1253857_625742
SRR1253857_338733
SRR1253856_306339
SRR1253851_160416
SRR1253848_483563
SRR1253846_241190
SRR1253845_442806
SRR1253764_209099
SRR1253763_350932
SRR1253763_160301
SRR1253763_35505
SRR1253763_145508
SRR1253762_637140
SRR1253762_173044
SRR1253762_127213
SRR1253760_316623
SRR1253759_282766
SRR1253759_129508
SRR1253759_40848
SRR1240137_132364
SRR1240136_355128
SRR1240135_81918
SRR1240134_494329
SRR1253976_72527
SRR1253976_188648
SRR1253976_42387
SRR1253974_680029
SRR1253974_642478
SRR1253974_425193
SRR1253974_130761
SRR1253974_2412
SRR1253935_245258
SRR1253935_11524
SRR1253758_500121
SRR1253758_245867
SRR1253758_193262
SRR1253758_69243
SRR1253758_242014
SRR1253757_187215
SRR1253757_176834
SRR1253757_117615
SRR1253757_116707
SRR1253756_214191
SRR1253756_192498
SRR1253756_174443
SRR1253756_60690
SRR1253756_53929
SRR1253755_509068
SRR1253755_249566
SRR1253755_119291
SRR1253755_7488
SRR1253755_393390
SRR1253755_317083
SRR1253755_261539
SRR1253755_198970
SRR1253755_169245
SRR1253754_268308
SRR1253754_202656
SRR1253754_569013
SRR1253754_500518
SRR1253754_344835
SRR1253754_141272
SRR1253754_133817
SRR1253754_11378
SRR1253753_222185
SRR1253752_158887
SRR1253752_161482
SRR1253750_711723
SRR1253750_481660
SRR1253750_91742
SRR1253750_622169
SRR1253749_254123
SRR1253749_186310
SRR1253749_85019
SRR1253748_328089
SRR1253748_148404
SRR1253747_559654
SRR1253747_467229
SRR1253747_387267
SRR1253747_364906
SRR1253747_191935
SRR1253747_7648
SRR1253747_375156
SRR1253747_97679
SRR1253746_605991
SRR1253746_573666
SRR1253746_16824
SRR1253746_472816
SRR1253745_337461
SRR1253745_193881
SRR1253745_113320
SRR1253745_263418
SRR1253744_421612
SRR1253744_413948
SRR1253744_288376
SRR1253744_258489
SRR1253744_327103
SRR1253743_53579
SRR1253743_374563
SRR1253743_332428
SRR1253742_687145
SRR1253742_381865
SRR1253742_295195
SRR1253742_220794
SRR1253741_14952
SRR1253741_76188
SRR1253699_305811
SRR1253698_232174
SRR1253698_40176
SRR1253697_203996
SRR1253697_108620
SRR1253697_66442
SRR1253696_333411
SRR1253696_309257
SRR1253695_512889
SRR1253695_425186
SRR1253695_244611
SRR1253695_127990
SRR1253695_76230
SRR1253695_68556
SRR1253694_627314
SRR1253694_604594
SRR1253694_468587
SRR1253694_180773
SRR1253694_173199
SRR1253694_56894
SRR1253694_535805
SRR1253694_17943
SRR1253693_459952
SRR1253693_367449
SRR1253693_236054
SRR1253692_430668
SRR1253692_381479
SRR1253692_81513
SRR1253691_683424
SRR1253691_550084
SRR1253691_153974
SRR1253691_86304
SRR1253691_681754
SRR1253690_41162
SRR1240172_454026
SRR1240172_423834
SRR1240172_16331
SRR1240171_368416
SRR1240171_195138
SRR1240171_5121
SRR1240170_514684
SRR1240170_156346
SRR1240170_86125
SRR1240170_37221
SRR1240170_30981
SRR1240170_422347
SRR1240170_388462
SRR1240170_385886
SRR1240169_537562
SRR1240168_219846
SRR1240167_401784
SRR1240167_214263
SRR1240167_144210
SRR1253934_123711
SRR1253933_410256
SRR1253932_259034
SRR1253932_563546
SRR1253931_415031
SRR1253931_174670
SRR1253931_390265
SRR1253930_348719
SRR1253930_181929
SRR1253930_119749
SRR1253907_111075
SRR1253906_640466
SRR1253906_410229
SRR1253906_380620
SRR1253906_79160
SRR1253905_450767
SRR1253905_220295
SRR1253905_60024
SRR1253903_98065
SRR1253900_260522
SRR1253900_51118
SRR1253899_28344
SRR1253898_628005
SRR1253898_507864
SRR1253898_175594
SRR1253898_13442
SRR1253897_760688
SRR1253897_659668
SRR1253897_620847
SRR1253897_400487
SRR1253897_775625
SRR1253896_323025
SRR1253896_54839
SRR1253896_207478
SRR1253896_187864
SRR1253896_187747
SRR1253896_124575
SRR1253895_417168
SRR1253895_36152
SRR1253895_403626
SRR1253894_319486
SRR1253894_295069
SRR1253894_225151
SRR1253894_19761
SRR1253894_532687
SRR1253894_370520
SRR1253894_136010
SRR1253893_780326
SRR1253893_731286
SRR1253893_606486
SRR1253893_594923
SRR1253893_592349
SRR1253893_357435
SRR1253893_246221
SRR1253893_162464
SRR1253893_768545
SRR1253893_268393
SRR1253893_244525
SRR1240166_955288
SRR1240166_947626
SRR1240166_741961
SRR1240166_521557
SRR1240166_455649
SRR1240166_5180
SRR1240165_753545
SRR1240165_568259
SRR1240164_197248
SRR1240164_330649
SRR1240163_237103
SRR1240162_521619
SRR1240162_442486
SRR1240162_375800
SRR1240162_258805
SRR1240162_43930
SRR1253892_49926
SRR1253892_39100
SRR1253892_247954
SRR1253892_225694
SRR1253891_136780
SRR1253891_336532
SRR1253891_60607
SRR1253890_530892
SRR1253890_447063
SRR1253890_84770
SRR1253890_486772
SRR1253890_414795
SRR1253890_276503
SRR1253889_519437
SRR1253889_204628
SRR1253889_168096
SRR1253888_309121
SRR1253888_216888
SRR1253888_194541
SRR1253888_80593
SRR1253888_319604
SRR1253888_146390
SRR1253888_30191
SRR1253883_203801
SRR1253883_135929
SRR1253883_63935
SRR1253883_266560
SRR1253883_56424
SRR1253881_374033
SRR1253881_121993
SRR1253881_116061
SRR1253881_109366
SRR1253881_10125
SRR1253881_496083
SRR1253881_288782
SRR1253881_216696
SRR1253881_206284
SRR1253881_54085
SRR1253881_34900
SRR1253880_226102
SRR1253880_170724
SRR1253880_71060
SRR1253880_390574
SRR1253880_195367
SRR1253879_282761
SRR1253879_245230
SRR1253879_212754
SRR1253879_202867
SRR1253879_126626
SRR1253879_40677
SRR1253879_26059
SRR1253878_244012
SRR1253878_233007
SRR1253878_123442
SRR1253877_120658
SRR1253877_584122
SRR1253877_553230
SRR1253877_382934
SRR1253876_327517
SRR1253876_128251
SRR1253876_516456
SRR1253876_444532
SRR1253876_240944
SRR1253876_186839
SRR1253875_275364
SRR1253875_274244
SRR1253875_220551
SRR1253875_129922
SRR1253875_246978
SRR1253874_194487
SRR1253874_78234
SRR1253874_187154
SRR1253873_183706
SRR1253873_319456
SRR1253872_315159
SRR1253872_60558
SRR1253872_453827
SRR1253872_433080
SRR1253872_367627
SRR1253872_289244
SRR1253872_273159
SRR1253872_33128
SRR1253872_31819
SRR1253871_162325
SRR1253871_14201
SRR1253870_165957
SRR1253869_384664
SRR1253869_262077
SRR1253869_117694
SRR1253869_385546
SRR1253869_338736
SRR1253868_185078
SRR1253867_644770
SRR1253867_545542
SRR1253867_282426
SRR1253866_480734
SRR1253866_552199
SRR1253866_513827
SRR1253865_975707
SRR1253865_809591
SRR1253865_759401
SRR1253865_254098
SRR1253865_735621
SRR1253865_470766
SRR1253865_373715
SRR1253864_708730
SRR1253864_578692
SRR1253864_418548
SRR1253864_374333
SRR1253864_358680
SRR1253864_128409
SRR1253864_377037
SRR1253864_65227
SRR1253863_146178
SRR1253863_15284
SRR1253863_4774
SRR1253862_116867
SRR1253861_359620
SRR1253861_330859
SRR1253861_234249
SRR1253861_99257
SRR1253861_305275
SRR1253860_164017
SRR1253860_46790
SRR1253860_6704
SRR1253859_63973
SRR1253859_51947
SRR1253859_361645
SRR1253858_384887
SRR1253857_584790
SRR1253857_430518
SRR1253857_430431
SRR1253857_338936
SRR1253857_337604
SRR1253857_268007
SRR1253857_215180
SRR1253857_56521
SRR1253857_41796
SRR1253857_660198
SRR1253857_444136
SRR1253857_127915
SRR1253856_283164
SRR1253856_69998
SRR1253856_566138
SRR1253855_418691
SRR1253855_149611
SRR1253854_304323
SRR1253853_1024464
SRR1253853_869098
SRR1253852_367275
SRR1253851_371908
SRR1253851_234932
SRR1253851_160896
SRR1253851_102983
SRR1253851_84828
SRR1253851_39849
SRR1253851_23392
SRR1253850_383642
SRR1253850_242675
SRR1253850_217819
SRR1253850_67063
SRR1253849_508967
SRR1253849_480060
SRR1253849_462804
SRR1253849_347627
SRR1253849_541463
SRR1253849_537561
SRR1253849_80717
SRR1253848_404094
SRR1253848_331677
SRR1253848_319823
SRR1253848_272490
SRR1253848_148500
SRR1253848_143025
SRR1253848_225993
SRR1253847_222404
SRR1253847_153877
SRR1253847_14473
SRR1253847_241600
SRR1253846_161365
SRR1253846_150780
SRR1253846_34898
SRR1253845_634242
SRR1253845_521585
SRR1253845_471592
SRR1253845_370782
SRR1253845_343812
SRR1253845_212654
SRR1253845_154103
SRR1253845_37217
SRR1253845_33041
SRR1253845_448599
SRR1253845_327155
SRR1253764_327261
SRR1253764_25489
SRR1253764_305382
SRR1253764_290163
SRR1253764_147277
SRR1253764_102427
SRR1253763_462593
SRR1253763_70119
SRR1253763_70094
SRR1253763_40937
SRR1253763_473788
SRR1253763_284050
SRR1253762_666327
SRR1253762_659147
SRR1253762_566264
SRR1253762_511059
SRR1253762_328702
SRR1253762_233635
SRR1253762_136157
SRR1253762_61076
SRR1253762_47624
SRR1253762_40188
SRR1253762_32656
SRR1253762_17482
SRR1253762_568186
SRR1253762_381130
SRR1253762_222874
SRR1253761_228118
SRR1253761_190444
SRR1253761_86889
SRR1253761_79607
SRR1253761_145865
SRR1253760_307856
SRR1253760_115652
SRR1253760_5170
SRR1253760_148246
SRR1253760_57106
SRR1253759_501468
SRR1253759_431814
SRR1253759_387118
SRR1253759_294371
SRR1253759_155735
SRR1253759_152138
SRR1253759_88106
SRR1253759_372813
SRR1240161_334095
SRR1240137_352366
SRR1240136_5720
SRR1240136_235847
SRR1240135_318340
SRR1240135_184136
SRR1240135_172908
SRR1240135_59135
SRR1240134_520015
SRR1240134_410158
SRR1240134_208738
SRR1240134_81492
SRR1240134_30678
SRR1240134_26891
SRR1253858_60259
SRR1253976_402522
SRR1253976_149125
SRR1253976_148585
SRR1253976_47359
SRR1253975_343722
SRR1253974_308811
SRR1253974_302371
SRR1253974_189279
SRR1253974_144222
SRR1253974_121668
SRR1253974_92195
SRR1253974_24359
SRR1253974_149587
SRR1253974_101331
SRR1253974_51235
SRR1253974_34312
SRR1253935_622615
SRR1253935_484799
SRR1253935_102404
SRR1253935_73187
SRR1253935_373661
SRR1253935_234682
SRR1253935_232903
SRR1253758_583533
SRR1253758_532119
SRR1253758_446950
SRR1253758_434588
SRR1253758_413190
SRR1253758_341798
SRR1253758_276372
SRR1253758_216837
SRR1253758_101835
SRR1253758_101309
SRR1253758_41210
SRR1253758_599372
SRR1253758_463745
SRR1253758_350561
SRR1253758_298559
SRR1253758_239964
SRR1253758_228576
SRR1253758_199868
SRR1253758_193859
SRR1253758_122188
SRR1253758_101379
SRR1253757_241788
SRR1253757_235292
SRR1253757_206541
SRR1253757_43012
SRR1253757_36314
SRR1253757_15065
SRR1253757_2465
SRR1253757_255124
SRR1253757_254108
SRR1253757_93302
SRR1253757_60644
SRR1253756_310045
SRR1253756_299315
SRR1253756_296310
SRR1253756_274787
SRR1253756_180301
SRR1253756_150415
SRR1253756_148595
SRR1253756_128667
SRR1253756_102520
SRR1253756_96980
SRR1253756_12749
SRR1253755_497573
SRR1253755_474011
SRR1253755_421803
SRR1253755_402148
SRR1253755_373157
SRR1253755_309958
SRR1253755_278041
SRR1253755_263315
SRR1253755_262640
SRR1253755_36537
SRR1253755_499938
SRR1253755_250565
SRR1253755_196195
SRR1253755_61705
SRR1253754_604671
SRR1253754_589998
SRR1253754_553930
SRR1253754_533730
SRR1253754_521318
SRR1253754_470048
SRR1253754_428404
SRR1253754_316157
SRR1253754_221255
SRR1253754_155537
SRR1253754_96103
SRR1253754_40133
SRR1253754_414356
SRR1253754_393105
SRR1253754_387631
SRR1253754_101982
SRR1253753_47477
SRR1253753_48536
SRR1253753_6979
SRR1253752_343531
SRR1253751_575481
SRR1253751_549376
SRR1253751_522235
SRR1253751_487602
SRR1253751_13446
SRR1253751_179647
SRR1253750_692375
SRR1253750_486038
SRR1253750_483705
SRR1253749_296184
SRR1253749_161429
SRR1253749_157670
SRR1253749_104144
SRR1253749_80443
SRR1253749_15627
SRR1253748_276578
SRR1253748_77806
SRR1253748_75337
SRR1253748_70619
SRR1253748_3654
SRR1253748_232621
SRR1253747_478077
SRR1253747_419154
SRR1253747_388048
SRR1253747_149500
SRR1253747_535974
SRR1253747_235721
SRR1253746_497577
SRR1253746_189895
SRR1253746_166971
SRR1253746_150337
SRR1253746_118457
SRR1253746_68305
SRR1253746_442917
SRR1253745_344156
SRR1253745_292892
SRR1253745_390979
SRR1253745_267853
SRR1253745_38404
SRR1253744_367081
SRR1253744_180629
SRR1253744_99567
SRR1253744_670
SRR1253743_543642
SRR1253743_531636
SRR1253743_328388
SRR1253743_264775
SRR1253743_105496
SRR1253743_88693
SRR1253743_64188
SRR1253743_53692
SRR1253743_582981
SRR1253743_155526
SRR1253743_127677
SRR1253742_719107
SRR1253742_697837
SRR1253742_649338
SRR1253742_623018
SRR1253742_588635
SRR1253742_495959
SRR1253742_472921
SRR1253742_320676
SRR1253742_228825
SRR1253742_216526
SRR1253742_134712
SRR1253742_51469
SRR1253742_25606
SRR1253742_130820
SRR1253742_27323
SRR1253741_189140
SRR1253741_184392
SRR1253741_9078
SRR1253741_258198
SRR1253740_268764
SRR1253740_164190
SRR1253740_7761
SRR1253740_85552
SRR1253740_23289
SRR1253699_355792
SRR1253699_312250
SRR1253699_310101
SRR1253699_275825
SRR1253699_187205
SRR1253699_158643
SRR1253699_130678
SRR1253699_13118
SRR1253699_29734
SRR1253698_509804
SRR1253698_477648
SRR1253698_368225
SRR1253698_325856
SRR1253698_260020
SRR1253698_57690
SRR1253698_266351
SRR1253697_279532
SRR1253697_193318
SRR1253697_113675
SRR1253697_110090
SRR1253697_90583
SRR1253697_74451
SRR1253697_63631
SRR1253697_14397
SRR1253697_268663
SRR1253697_188771
SRR1253697_159177
SRR1253697_62844
SRR1253696_324993
SRR1253696_177495
SRR1253696_148382
SRR1253696_104750
SRR1253696_38615
SRR1253696_251837
SRR1253696_73726
SRR1253695_520593
SRR1253695_432333
SRR1253695_392362
SRR1253695_350396
SRR1253695_334971
SRR1253695_312566
SRR1253695_291840
SRR1253695_289217
SRR1253695_234907
SRR1253695_151684
SRR1253695_134014
SRR1253695_53961
SRR1253694_583096
SRR1253694_573896
SRR1253694_531163
SRR1253694_499509
SRR1253694_479971
SRR1253694_338135
SRR1253694_313655
SRR1253694_312872
SRR1253694_284475
SRR1253694_276538
SRR1253694_142010
SRR1253694_406884
SRR1253694_367712
SRR1253694_192280
SRR1253693_385431
SRR1253693_17013
SRR1253692_448361
SRR1253692_238917
SRR1253692_340864
SRR1253691_913708
SRR1253691_911338
SRR1253691_737188
SRR1253691_596386
SRR1253691_596002
SRR1253691_560418
SRR1253691_428756
SRR1253691_373476
SRR1253691_323960
SRR1253691_291483
SRR1253691_111385
SRR1253691_67506
SRR1253691_45311
SRR1253690_728301
SRR1253690_337531
SRR1253690_176123
SRR1240172_389209
SRR1240172_337754
SRR1240172_240431
SRR1240172_156542
SRR1240172_91041
SRR1240172_65494
SRR1240172_4880
SRR1240172_349784
SRR1240171_352950
SRR1240171_152048
SRR1240171_112594
SRR1240171_82952
SRR1240171_60764
SRR1240170_665523
SRR1240170_573569
SRR1240170_510262
SRR1240170_498079
SRR1240170_395501
SRR1240170_487140
SRR1240170_226743
SRR1240169_587695
SRR1240169_579995
SRR1240169_490767
SRR1240169_320972
SRR1240169_298891
SRR1240169_206529
SRR1240169_110484
SRR1240169_84168
SRR1240169_39935
SRR1240169_309574
SRR1240169_240047
SRR1240168_207244
SRR1240168_217799
SRR1240168_43044
SRR1240167_379800
SRR1240167_344354
SRR1240167_336026
SRR1240167_211288
SRR1240167_206863
SRR1240167_284298
SRR1253934_258743
SRR1253934_195832
SRR1253934_132729
SRR1253934_301387
SRR1253933_292295
SRR1253933_176220
SRR1253932_444531
SRR1253932_317138
SRR1253932_310488
SRR1253932_485955
SRR1253932_384532
SRR1253932_72804
SRR1253931_485766
SRR1253907_428662
SRR1253907_231607
SRR1253906_440807
SRR1253906_423126
SRR1253906_252660
SRR1253906_238247
SRR1253906_161815
SRR1253905_463730
SRR1253905_291526
SRR1253904_117233
SRR1253902_47899
SRR1253902_469559
SRR1253900_444358
SRR1253900_425744
SRR1253900_409847
SRR1253900_404483
SRR1253900_231007
SRR1253900_109957
SRR1253900_14341
SRR1253900_55409
SRR1253899_383907
SRR1253899_181269
SRR1253899_132865
SRR1253899_46966
SRR1253899_428500
SRR1253898_734576
SRR1253898_707292
SRR1253898_629584
SRR1253898_436085
SRR1253898_37569
SRR1253898_235658
SRR1253898_95971
SRR1253897_757127
SRR1253897_589205
SRR1253897_519258
SRR1253897_492284
SRR1253897_456608
SRR1253897_346155
SRR1253897_96786
SRR1253897_59872
SRR1253897_585618
SRR1253896_183024
SRR1253896_167753
SRR1253896_22338
SRR1253896_276975
SRR1253895_273955
SRR1253895_270512
SRR1253895_194005
SRR1253895_76139
SRR1253895_56062
SRR1253895_195840
SRR1253894_656662
SRR1253894_654656
SRR1253894_352068
SRR1253894_322860
SRR1253894_228182
SRR1253894_184577
SRR1253894_165358
SRR1253894_653167
SRR1253894_647988
SRR1253894_286949
SRR1253894_270637
SRR1253894_248283
SRR1253894_231690
SRR1253894_228372
SRR1253893_766106
SRR1253893_716064
SRR1253893_684179
SRR1253893_671838
SRR1253893_631733
SRR1253893_589676
SRR1253893_578507
SRR1253893_566165
SRR1253893_549190
SRR1253893_541004
SRR1253893_737556
SRR1253893_717977
SRR1253893_541973
SRR1253893_453986
SRR1253893_259900
SRR1253893_43475
SRR1240166_910650
SRR1240166_800260
SRR1240166_328836
SRR1240166_247845
SRR1240166_756701
SRR1240166_152388
SRR1240165_867105
SRR1240165_570562
SRR1240165_538615
SRR1240165_493472
SRR1240165_75512
SRR1240165_27515
SRR1240165_812301
SRR1240165_727142
SRR1240165_648649
SRR1240165_65515
SRR1240164_229913
SRR1240164_220818
SRR1240164_147195
SRR1240164_77857
SRR1240164_163437
SRR1240164_21925
SRR1240163_257719
SRR1240163_235970
SRR1240163_233292
SRR1240162_596914
SRR1240162_523685
SRR1240162_499154
SRR1240162_482282
SRR1240162_263658
SRR1240162_180772
SRR1240162_154636
SRR1240162_94150
SRR1240162_595714
SRR1240162_558733
SRR1240162_352295
SRR1240162_334259
SRR1253892_318885
SRR1253892_102902
SRR1253892_102797
SRR1253892_17759
SRR1253892_144048
SRR1253892_118713
SRR1253892_92526
SRR1253892_58271
SRR1253892_43393
SRR1253892_34546
SRR1253891_216719
SRR1253891_215058
SRR1253891_121462
SRR1253891_231809
SRR1253891_181652
SRR1253891_140056
SRR1253891_59337
SRR1253891_24219
SRR1253891_19001
SRR1253890_433258
SRR1253890_318289
SRR1253890_289774
SRR1253890_250713
SRR1253890_214659
SRR1253890_75469
SRR1253890_371140
SRR1253890_15119
SRR1253889_626591
SRR1253889_612610
SRR1253889_600930
SRR1253889_535764
SRR1253889_519060
SRR1253889_476293
SRR1253889_279217
SRR1253889_219894
SRR1253889_173410
SRR1253889_75620
SRR1253889_3537
SRR1253889_600001
SRR1253889_462468
SRR1253889_234266
SRR1253889_208669
SRR1253889_150771
SRR1253889_81467
SRR1253889_38993
SRR1253888_328805
SRR1253888_309275
SRR1253888_294388
SRR1253888_288326
SRR1253888_271872
SRR1253888_233539
SRR1253888_195929
SRR1253888_166485
SRR1253888_161427
SRR1253888_108122
SRR1253888_93500
SRR1253888_66986
SRR1253888_1970
SRR1253888_197053
SRR1253888_113440
SRR1253888_43760
SRR1253883_290318
SRR1253883_239645
SRR1253883_100548
SRR1253883_284209
SRR1253883_262304
SRR1253883_231638
SRR1253882_205205
SRR1253882_156005
SRR1253881_276378
SRR1253881_245946
SRR1253881_225965
SRR1253881_218566
SRR1253881_30829
SRR1253881_293398
SRR1253881_233938
SRR1253881_212590
SRR1253880_444686
SRR1253880_287329
SRR1253880_159218
SRR1253880_16994
SRR1253880_301922
SRR1253880_163877
SRR1253880_50350
SRR1253879_235357
SRR1253879_181687
SRR1253879_156380
SRR1253879_94491
SRR1253879_12456
SRR1253879_90854
SRR1253878_246336
SRR1253878_226875
SRR1253878_225387
SRR1253878_116200
SRR1253878_104370
SRR1253878_79657
SRR1253878_59664
SRR1253878_3158
SRR1253878_249845
SRR1253878_208810
SRR1253877_587660
SRR1253877_501420
SRR1253877_478833
SRR1253877_456083
SRR1253877_412570
SRR1253877_274763
SRR1253877_248168
SRR1253877_246926
SRR1253877_423603
SRR1253877_406598
SRR1253877_400858
SRR1253877_356945
SRR1253877_319367
SRR1253877_247370
SRR1253877_162199
SRR1253877_13103
SRR1253876_314767
SRR1253876_309148
SRR1253876_155735
SRR1253876_502830
SRR1253876_239136
SRR1253876_200931
SRR1253875_294441
SRR1253875_284815
SRR1253875_283708
SRR1253875_272939
SRR1253875_181961
SRR1253875_159616
SRR1253875_228004
SRR1253875_63327
SRR1253875_25212
SRR1253874_14233
SRR1253874_168758
SRR1253874_157506
SRR1253874_61478
SRR1253874_45845
SRR1253873_349599
SRR1253873_316248
SRR1253873_291110
SRR1253873_257666
SRR1253873_226926
SRR1253873_168449
SRR1253873_128814
SRR1253873_109789
SRR1253873_54859
SRR1253873_39084
SRR1253873_555903
SRR1253873_545240
SRR1253873_518594
SRR1253873_404276
SRR1253873_318480
SRR1253873_317339
SRR1253873_223770
SRR1253873_76938
SRR1253873_1759
SRR1253872_487699
SRR1253872_449488
SRR1253872_447418
SRR1253872_432081
SRR1253872_425834
SRR1253872_424467
SRR1253872_346359
SRR1253872_155499
SRR1253872_8632
SRR1253872_446625
SRR1253872_409031
SRR1253872_99913
SRR1253871_113330
SRR1253871_217158
SRR1253871_126646
SRR1253871_109857
SRR1253871_68128
SRR1253871_61513
SRR1253871_33880
SRR1253870_87021
SRR1253870_49128
SRR1253870_225444
SRR1253870_72502
SRR1253870_49718
SRR1253869_427727
SRR1253869_394391
SRR1253869_385903
SRR1253869_179108
SRR1253869_64920
SRR1253869_351439
SRR1253869_311786
SRR1253868_403941
SRR1253868_390298
SRR1253868_330522
SRR1253868_266384
SRR1253868_226621
SRR1253868_172658
SRR1253868_169512
SRR1253868_295782
SRR1253868_259136
SRR1253868_166761
SRR1253868_22761
SRR1253867_632931
SRR1253867_588325
SRR1253867_556216
SRR1253867_479102
SRR1253867_235537
SRR1253867_213066
SRR1253867_166135
SRR1253867_98508
SRR1253867_96225
SRR1253867_73150
SRR1253867_340696
SRR1253867_273416
SRR1253867_92700
SRR1253866_551340
SRR1253866_517568
SRR1253866_460932
SRR1253866_319938
SRR1253866_268627
SRR1253866_3751
SRR1253865_997161
SRR1253865_940534
SRR1253865_779804
SRR1253865_393515
SRR1253865_229399
SRR1253865_158935
SRR1253865_110972
SRR1253865_4106
SRR1253865_992984
SRR1253865_880397
SRR1253865_832942
SRR1253865_761995
SRR1253865_492053
SRR1253865_414039
SRR1253865_276168
SRR1253865_236437
SRR1253865_214708
SRR1253864_870274
SRR1253864_704323
SRR1253864_479661
SRR1253864_379606
SRR1253864_202749
SRR1253864_73654
SRR1253864_920033
SRR1253864_778664
SRR1253864_720340
SRR1253864_564530
SRR1253864_400157
SRR1253864_19123
SRR1253863_212138
SRR1253863_204032
SRR1253863_118064
SRR1253863_63867
SRR1253863_190547
SRR1253863_165175
SRR1253863_156407
SRR1253863_114064
SRR1253862_183041
SRR1253862_140407
SRR1253862_95030
SRR1253862_88308
SRR1253862_30628
SRR1253862_14473
SRR1253862_4994
SRR1253862_134097
SRR1253861_314495
SRR1253861_178679
SRR1253861_62866
SRR1253861_61720
SRR1253861_51296
SRR1253861_361101
SRR1253861_239338
SRR1253861_87668
SRR1253861_48006
SRR1253860_275623
SRR1253860_113577
SRR1253860_195994
SRR1253860_155201
SRR1253860_36744
SRR1253860_31043
SRR1253859_451305
SRR1253859_361963
SRR1253859_315054
SRR1253859_255342
SRR1253859_247939
SRR1253859_211013
SRR1253859_129709
SRR1253859_99510
SRR1253859_49523
SRR1253859_454430
SRR1253859_387942
SRR1253859_365624
SRR1253859_331042
SRR1253859_160539
SRR1253859_147709
SRR1253858_370698
SRR1253858_355733
SRR1253858_30109
SRR1253858_27026
SRR1253857_570201
SRR1253857_561597
SRR1253857_499417
SRR1253857_494558
SRR1253857_490029
SRR1253857_313127
SRR1253857_139699
SRR1253857_8170
SRR1253857_587421
SRR1253857_449471
SRR1253857_320857
SRR1253857_151652
SRR1253857_110029
SRR1253857_77180
SRR1253856_397839
SRR1253856_391278
SRR1253856_341801
SRR1253856_144661
SRR1253856_96991
SRR1253856_568176
SRR1253856_540327
SRR1253856_517178
SRR1253856_228398
SRR1253856_86533
SRR1253856_73651
SRR1253855_449720
SRR1253855_455839
SRR1253854_499907
SRR1253854_178730
SRR1253853_883640
SRR1253853_521212
SRR1253853_40586
SRR1253852_955342
SRR1253852_842873
SRR1253852_757866
SRR1253852_656727
SRR1253852_3272
SRR1253852_543223
SRR1253851_356317
SRR1253851_335047
SRR1253851_325789
SRR1253851_271874
SRR1253851_268372
SRR1253851_252555
SRR1253851_183784
SRR1253851_164049
SRR1253851_25269
SRR1253851_304685
SRR1253851_281155
SRR1253851_218833
SRR1253851_196710
SRR1253851_42289
SRR1253850_418548
SRR1253850_198510
SRR1253850_154578
SRR1253850_148752
SRR1253850_104600
SRR1253850_61015
SRR1253850_36660
SRR1253850_11629
SRR1253850_339651
SRR1253850_205395
SRR1253850_173121
SRR1253849_487976
SRR1253849_425998
SRR1253849_393023
SRR1253849_268482
SRR1253849_255853
SRR1253849_193016
SRR1253849_192895
SRR1253849_125123
SRR1253849_16305
SRR1253849_4332
SRR1253849_435316
SRR1253849_86354
SRR1253849_69051
SRR1253848_455545
SRR1253848_430716
SRR1253848_400223
SRR1253848_264810
SRR1253848_195231
SRR1253848_168369
SRR1253848_166388
SRR1253848_165930
SRR1253848_90010
SRR1253848_6830
SRR1253848_372415
SRR1253848_160489
SRR1253848_2780
SRR1253847_275383
SRR1253847_219762
SRR1253847_58878
SRR1253847_222914
SRR1253846_168784
SRR1253846_118525
SRR1253846_75411
SRR1253846_65390
SRR1253846_39747
SRR1253846_80654
SRR1253845_602978
SRR1253845_533521
SRR1253845_526602
[truncated: 235,436+ more rows]

## Sheet: Notes
Description	Project/Organism	Number of unique reads	Project/Organism	Number of unique reads
Read IDs that were identified with the MAGC approach from the metagenomic studies:	NPSG: SRP041215		CCS: SRP017469
Organisms:	Prochlorococcus	237436	Synechococcus	5548
	SAR11	2767	SAR11	1101
			Eukaryotic rbcL	11482
Each read ID consists of the sample ID (SRR) and read ID.
All read IDs for the selected organisms are shown including those that did not pass through the final filter with 3 probes (see Methods).
